# Supplementary material for: A structure-based approach towards the identification of novel antichagasic compounds: Trypanosoma cruzi carbonic anhydrase inhibitors
Source: PubMed Central journal article supplement (PMC6807911; doi:10.1080/14756366.2019.1677638), 2019-10-16
Supplement: IENZ_A_1677638_SM5177.pdf [file IENZ_A_1677638_SM5177.pdf]

Figure S1

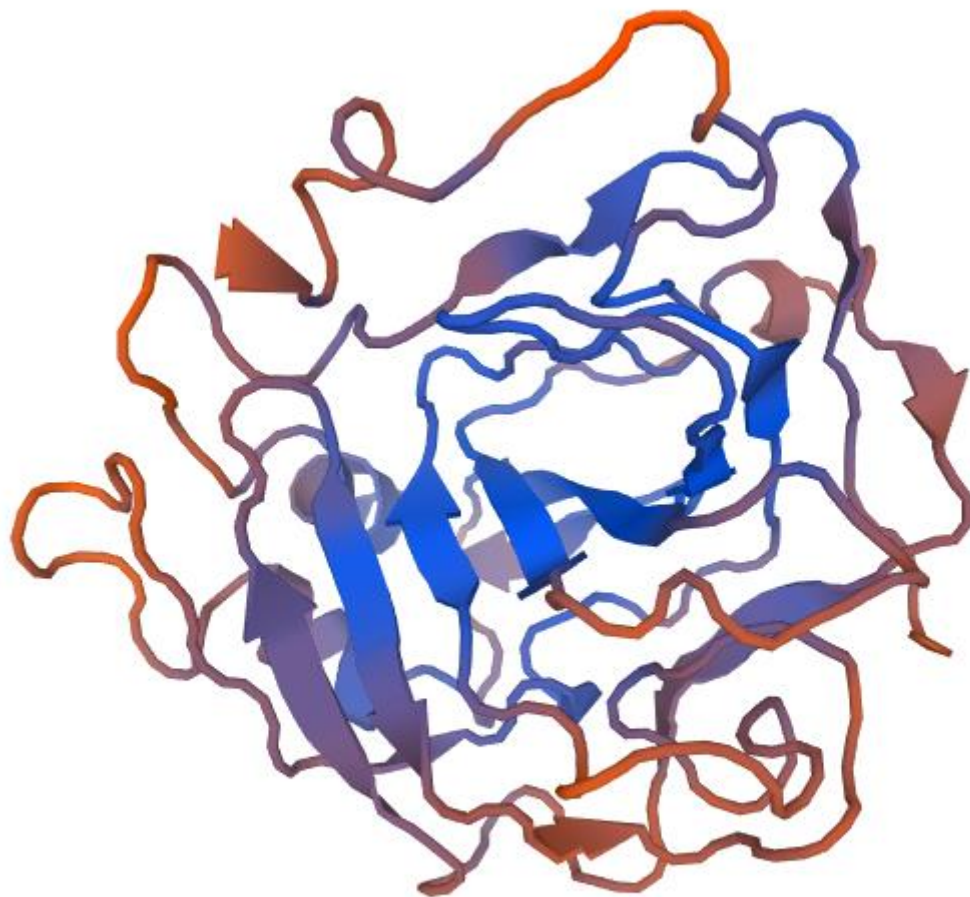

Table S1

| SMILES                                                                    | pKi  | Docking Score |
|---------------------------------------------------------------------------|------|---------------|
| <chem>COc1ccc(CC(=O)[N-]c2nnc(S([NH-])(=O)=O)s2)cc1</chem>                | 9.29 | -9.25         |
| <chem>[NH-]S(=O)(=O)c1nnc([N-]C(=O)Cc2ccccc2Br)s1</chem>                  | 9.08 | -10.49        |
| <chem>[NH-]S(=O)(=O)c1nnc([N-]C(=O)Cc2ccc(Cl)cc2)s1</chem>                | 9.02 | -13.41        |
| <chem>NS(=O)(=O)c1ccc(NC(=O)Cc2ccc(Cl)cc2)c(F)c1</chem>                   | 8.92 | -9.58         |
| <chem>NS(=O)(=O)c1ccc(NC(=O)Cc2ccccc2Br)c(F)c1</chem>                     | 8.80 | -10.47        |
| <chem>NS(=O)(=O)c1ccc(NC(=O)Cc2ccc(Cl)cc2)cc1</chem>                      | 8.57 | -9.63         |
| <chem>NS(=O)(=O)c1ccc(CCNC(=O)Cc2ccccc2Br)cc1</chem>                      | 8.48 | -10.98        |
| <chem>NS(=O)(=O)c1ccc(CNC(=O)Cc2ccc(F)cc2)cc1</chem>                      | 8.43 | -10.32        |
| <chem>COc1ccc(CC(=O)Nc2ccc(S(N)(=O)=O)cc2F)cc1</chem>                     | 8.39 | -9.83         |
| <chem>NS(=O)(=O)c1ccc(NC(=O)Cc2ccc(F)cc2)c(Cl)c1</chem>                   | 8.15 | -9.35         |
| <chem>NS(=O)(=O)c1ccc(NC(=O)Cc2ccc(Cl)cc2)c(Br)c1</chem>                  | 8.15 | -9.74         |
| <chem>COc1ccc(CC(=O)Nc2ccc(S(N)(=O)=O)cc2Br)cc1</chem>                    | 8.14 | -9.99         |
| <chem>COc1ccc(CC(=O)NCc2ccc(S(N)(=O)=O)cc2)cc1</chem>                     | 8.13 | -9.93         |
| <chem>COc1ccc(CC(=O)NCCc2ccc(S(N)(=O)=O)cc2)cc1</chem>                    | 8.12 | -9.57         |
| <chem>NS(=O)(=O)c1nnc(NC(=O)Cc2ccc(F)cc2)s1</chem>                        | 8.12 | -11.81        |
| <chem>NS(=O)(=O)c1ccc(NC(=O)Cc2ccc(Cl)cc2)c(Cl)c1</chem>                  | 8.11 | -10.68        |
| <chem>NS(=O)(=O)c1ccc(NC(=O)Cc2ccccc2Br)c(Cl)c1</chem>                    | 8.11 | -9.57         |
| <chem>COc1ccc(CC(=O)Nc2ccc(S(N)(=O)=O)cc2Cl)cc1</chem>                    | 8.10 | -10.06        |
| <chem>COc1ccc(CC(=O)Nc2ccc(S(N)(=O)=O)cc2)cc1</chem>                      | 8.10 | -9.97         |
| <chem>NS(=O)(=O)c1ccc(NC(=O)Cc2ccc(F)cc2)c(F)c1</chem>                    | 8.08 | -9.32         |
| <chem>NS(=O)(=O)c1ccc(NC(=O)Cc2ccc(F)cc2)cc1</chem>                       | 8.07 | -9.35         |
| <chem>NS(=O)(=O)c1ccc(NC(=O)Cc2ccccc2Br)cc1</chem>                        | 8.05 | -9.76         |
| <chem>NS(=O)(=O)c1ccc(NC(=O)Cc2ccc(F)cc2)c(Br)c1</chem>                   | 8.05 | -9.49         |
| <chem>NS(=O)(=O)c1ccc(CNC(=O)Cc2ccccc2Br)cc1</chem>                       | 8.05 | -10.81        |
| <chem>NS(=O)(=O)c1ccc(CCNC(=O)Cc2ccc(F)cc2)cc1</chem>                     | 8.04 | -10.36        |
| <chem>NS(=O)(=O)c1ccc(NC(=O)Cc2ccccc2Br)c(Br)c1</chem>                    | 7.96 | -9.64         |
| <chem>NS(=O)(=O)c1ccc(CCNC(=O)Cc2ccc(Cl)cc2)cc1</chem>                    | 7.93 | -10.29        |
| <chem>NS(=O)(=O)c1ccc(CNC(=O)Cc2ccc(Cl)cc2)cc1</chem>                     | 7.90 | -10.63        |
| <chem>O=C(N/N=C/c1ccccc1)Nc1n[n-]c(=S)s1</chem>                           | 7.68 | -9.96         |
| <chem>COc1cccc(/C=N/NC(=O)Nc2n[n-]c(=S)s2)c1</chem>                       | 7.46 | -9.99         |
| <chem>O=C(NO)[C@H]1CC(c2ccc(OCc3ccccc3)cc2)=NO1</chem>                    | 7.40 | -11.43        |
| <chem>O=C(N/N=C/c1ccc(Br)c1)Nc1n[n-]c(=S)s1</chem>                        | 7.37 | -10.48        |
| <chem>CC(C)C/C=N\NC(=O)Nc1n[n-]c(=S)s1</chem>                             | 7.28 | -8.6          |
| <chem>CC(=O)Nc1nnc(S(N)(=O)=O)s1</chem>                                   | 7.21 | -9.41         |
| <chem>O=C(N/N=C/c1ccc(Cl)cc1)Nc1n[n-]c(=S)s1</chem>                       | 7.19 | -8.99         |
| <chem>CCOc1ccc(C2=NO[C@@H](C(=O)NO)C2)cc1</chem>                          | 7.15 | -9.5          |
| <chem>NS(=O)(=O)c1ccc(N2CCCCS2(=O)=O)cc1</chem>                           | 7.14 | -9.08         |
| <chem>O=C(N/N=C1/C(=O)Nc2ccc(Br)cc21)Nc1n[n-]c(=S)s1</chem>               | 7.14 | -9.94         |
| <chem>CC(=O)/N=c1\sc(S(N)(=O)=O)nn1C</chem>                               | 7.13 | -7.8          |
| <chem>O=C(N/N=C1/C(=O)Nc2ccccc21)Nc1n[n-]c(=S)s1</chem>                   | 7.10 | -9.97         |
| <chem>Cc1onc(-c2ccccc2)c1-c1ccc(S(N)(=O)=O)cc1</chem>                     | 7.08 | -10.16        |
| <chem>NS(=O)(=O)c1ccc(S(=O)(=O)Nc2ccc3c(Cl)c[nH]c23)cc1</chem>            | 7.07 | -11.22        |
| <chem>CC1(C)O[C@@H]2CO[C@@]3(COS(N)(=O)=O)OC(C)(C)O[C@H]3[C@@H]2O1</chem> | 7.07 | -8.76         |

|                                                          |      |        |
|----------------------------------------------------------|------|--------|
| CCN[C@H]1CN(CCCOC)S(=O)(=O)c2sc(S(N)(=O)=O)cc21          | 7.06 | -8.82  |
| CCN1CCC[C@H]1CNC(=O)c1cc(S(N)(=O)=O)ccc1OC               | 7.06 | -10.26 |
| CCOc1ccc2nc(S(N)(=O)=O)sc2c1                             | 7.05 | -8.94  |
| Nc1ccc(S(=O)(=O)Nc2nnc(S(N)(=O)=O)s2)cc1                 | 7.05 | -10.47 |
| Cc1ccc(-c2cc(C(F)(F)F)nn2-c2ccc(S(N)(=O)=O)cc2)cc1       | 7.04 | -10.03 |
| CCN[C@H]1C[C@H](C)S(=O)(=O)c2sc(S(N)(=O)=O)cc21          | 7.03 | -10.19 |
| NS(=O)(=O)Cc1nnc(NS(=O)(=O)c2ccccc2)s1                   | 7.03 | -11.63 |
| CCOc1ccccc1C1=NO[C@@H](C(=O)NO)C1                        | 7.03 | -8.96  |
| C/C(=N\NC(=O)Nc1n[n-]c(=S)s1)c1ccc(Cl)cc1                | 7.02 | -9.54  |
| NNC(=O)Nc1n[n-]c(=S)s1                                   | 6.90 | -6.93  |
| NS(=O)(=O)c1cc(Cl)c(Cl)c(S(N)(=O)=O)c1                   | 6.89 | -9.18  |
| NS(=O)(=O)c1ccc(CCNS(=O)(=O)c2ccc([N+](=O)[O-])cc2CO)cc1 | 6.87 | -10.66 |
| NS(=O)(=O)c1cc2c(cc1Cl)NCNS2(=O)=O                       | 6.87 | -9.19  |
| C[C@@]1(C(=O)NO)CC(c2ccccc2F)=NO1                        | 6.85 | -7.97  |
| C[C@@]1(C(=O)NO)CC(c2ccccc(F)c2)=NO1                     | 6.74 | -7.92  |
| O=C(NO)[C@H]1CC(c2ccc(Cl)cc2)=NO1                        | 6.72 | -9.66  |
| Nc1ccc(S(=O)(=O)NCCc2ccc(S(N)(=O)=O)cc2)cc1              | 6.72 | -11.65 |
| Nc1ccc(S(=O)(=O)NCc2ccc(S(N)(=O)=O)cc2)cc1               | 6.61 | -10.11 |
| O=C(NO)[C@H]1CC(c2ccccc2Cl)=NO1                          | 6.58 | -9.39  |
| O=C(NO)[C@H]1CC(c2ccccc(Cl)c2)=NO1                       | 6.57 | -9.36  |
| Nc1ccc(S(=O)(=O)Nc2ccc(S(N)(=O)=O)cc2)cc1                | 6.44 | -10.01 |
| C[C@@]1(C(=O)NO)CC(c2ccccc(Cl)c2)=NO1                    | 6.44 | -8.17  |
| O=C(NO)[C@H]1CC(c2ccccc2)=NO1                            | 6.37 | -9.17  |
| Nc1nnc(S(N)(=O)=O)s1                                     | 6.27 | -8.77  |
| C[C@@]1(C(=O)NO)CC(c2ccccc(Br)c2)=NO1                    | 6.21 | -8.29  |
| Cn1nc(S(N)(=O)=O)sc1=N                                   | 6.19 | -7.93  |
| Nc1nccc(Nc2ccc(S(N)(=O)=O)cc2)n1                         | 6.09 | -8.79  |
| Nc1cc(Cl)c(S(N)(=O)=O)cc1S(N)(=O)=O                      | 6.09 | -8.9   |
| Nc1cc(C(F)(F)F)c(S(N)(=O)=O)cc1S(N)(=O)=O                | 6.07 | -8.52  |
| NS(=O)(=O)Cc1noc2ccccc12                                 | 6.06 | -9.89  |
| Nc1ccc(S(N)(=O)=O)cc1Cl                                  | 5.16 | -8.18  |
| NCc1ccc(S(N)(=O)=O)cc1                                   | 5.14 | -8.46  |
| Nc1ccc(S(N)(=O)=O)cc1F                                   | 5.09 | -8     |
| Nc1ccc(S(N)(=O)=O)cc1Br                                  | 5.07 | -8.27  |
| NCCc1ccc(S(N)(=O)=O)cc1                                  | 5.03 | -8.51  |
| NS(=O)(=O)c1cc(Cl)cc(Cl)c1O                              | 5.03 | -8.53  |
| Nc1ccccc(S(N)(=O)=O)c1                                   | 4.59 | -8.22  |
| Cc1ccc(S(N)(=O)=O)cc1                                    | 4.35 | -8.14  |
| Nc1ccc(S(N)(=O)=O)cc1                                    | 4.24 | -8.12  |
| NS(=O)(=O)c1ccccc(S(N)(=O)=O)c1                          | 4.20 | -8.77  |
| NS(=O)(=O)c1ccc(CCO)cc1                                  | 4.18 | -8.02  |
| NS(=O)(=O)c1ccc(CO)cc1                                   | 4.14 | -8.16  |
| NS(=O)(=O)c1ccc(O)cc1                                    | 4.13 | -8.01  |
| NS(=O)(=O)c1ccc(C(=O)O)cc1                               | 4.08 | -8.19  |

Table S2

| SMILES                                                                                                                             | Docking Score |
|------------------------------------------------------------------------------------------------------------------------------------|---------------|
| <chem>O=C(Nc1ccc(S(=O)(=O)[N-]c2nccs2)cc1)c1ccccc1C(=O)c1ccccc1</chem>                                                             | -11.1         |
| <chem>C(=Cc1ccccc1)C[N@H+]1CC[N@@H+](C(c2ccccc2)c2ccccc2)CC1</chem>                                                                | -11.01        |
| <chem>Cc1cn(-c2cc(NC(=O)c3ccc(C)c(Nc4ncccc(-c5cccn5)n4)c3)cc(C(F)(F)F)c2)cn1</chem>                                                | -10.81        |
| <chem>c1ccc(-c2ccc([C@H](c3ccccc3)n3ccnc3)cc2)cc1</chem>                                                                           | -10.76        |
| <chem>CCCc1nn(C)c2c(=O)nc(-c3cc(S(=O)(=O)N4CC[NH+](C)CC4)ccc3OCC)[nH]c12</chem>                                                    | -10.43        |
| <chem>O=C(Nc1ccc(S(=O)(=O)[N-]c2ncccn2)cc1)C(c1ccccc1)c1ccccc1</chem>                                                              | -10.41        |
| <chem>O=C([O-])c1cc(/N=N/c2ccc(S(=O)(=O)Nc3cccn3)cc2)ccc1O</chem>                                                                  | -10.32        |
| <chem>Cc1ccc(C)c(OCCCC(C)(C)C(=O)Nc2ccc(S(=O)(=O)[N-]c3ncccn3)cc2)c1</chem>                                                        | -10.29        |
| <chem>O=C(Nc1ccc(S(=O)(=O)[N-]c2ncccn2)cc1)c1ccccc1C(=O)c1ccccc1</chem>                                                            | -10.29        |
| <chem>Cc1ccc(-c2cc(C(F)(F)F)nn2-c2ccc(S(N)(=O)=O)cc2)cc1</chem>                                                                    | -10.18        |
| <chem>CC(C)(O)c1ccccc1CC[C@H](SCC1(CC(=O)[O-])CC1)c1ccc(/C=C/c2ccc3ccc(Cl)cc3n2)c1</chem>                                          | -9.94         |
| <chem>Clc1ccc(CO[C@H](Cn2ccnc2)c2ccc(Cl)cc2Cl)cc1</chem>                                                                           | -9.86         |
| <chem>C#C[C@]1(O)CC[C@H]2[C@@H]3CCC4=Cc5oncc5C[C@]4(C)[C@H]3CC[C@@]21C</chem>                                                      | -9.83         |
| <chem>Clc1ccc(CO[C@H](Cn2ccnc2)c2ccc(Cl)cc2Cl)c(Cl)c1</chem>                                                                       | -9.83         |
| <chem>CC[C@@H](C)n1ncn(-c2ccc(N3CCN(c4ccc(OC[C@H]5CO[C@](Cn6cncn6)(c6ccc(Cl)cc6Cl)O5)cc4)CC3)cc2)c1=O</chem>                       | -9.81         |
| <chem>Nc1ccccc1C(=O)Nc1ccc(S(=O)(=O)[N-]c2nccs2)cc1</chem>                                                                         | -9.69         |
| <chem>O=C(NC1CCCCC1)c1cccn1</chem>                                                                                                 | -9.65         |
| <chem>O=S(=O)(NCCc1ccccc1)NCCc1ccccc1</chem>                                                                                       | -9.64         |
| <chem>O=C(Nc1ccc(S(=O)(=O)[N-]c2nccs2)cc1)c1cccc([N+](=O)[O-])c1</chem>                                                            | -9.64         |
| <chem>CC(C)C[C@H]1C(=O)N2CCC[C@H]2[C@]2(O)O[C@](NC(=O)[C@@H]3C=C4c5ccccc6[nH]c(Br)c(c56)C[C@H]4[N@@H+](C)C3)(C(C)C)C(=O)N12</chem> | -9.59         |
| <chem>COc1ccc(CC[N@@H+](C)CCC[C@](C#N)(c2ccc(OC)c(OC)c2)C(C)C)c1OC</chem>                                                          | -9.57         |
| <chem>Clc1ccccc1C(c1ccccc1)(c1ccccc1)n1ccn1</chem>                                                                                 | -9.56         |
| <chem>O=C(Nc1ccc(S(=O)(=O)[N-]c2ncccn2)cc1)c1ccccc1Cl</chem>                                                                       | -9.54         |
| <chem>Nc1ccc(S(=O)(=O)Nc2ncccn2)cc1</chem>                                                                                         | -9.53         |
| <chem>Nc1ccccc1C(=O)Nc1ccc(S(=O)(=O)[N-]c2ncccn2)cc1</chem>                                                                        | -9.53         |
| <chem>Nc1ccc(C(=O)Nc2ccc(S(=O)(=O)[N-]c3nccs3)cc2)c1</chem>                                                                        | -9.51         |
| <chem>CSelnc2cc(Oc3ccccc(Cl)c3Cl)c(Cl)cc2[nH]1</chem>                                                                              | -9.49         |
| <chem>O=S(=O)(NC1CCCCC1)NC1CCCCC1</chem>                                                                                           | -9.47         |
| <chem>CC(C)(C)C(=O)Nc1ccc(S(=O)(=O)[N-]c2ncccn2)cc1</chem>                                                                         | -9.45         |
| <chem>O=C(Nc1ccc(S(=O)(=O)[N-]c2nccs2)cc1)C(c1ccccc1)c1ccccc1</chem>                                                               | -9.43         |
| <chem>CC(=O)N1CCN(c2ccc(OC[C@H]3CO[C@](Cn4ccnc4)(c4ccc(Cl)cc4Cl)O3)cc2)CC1</chem>                                                  | -9.41         |
| <chem>O=C(Nc1ccc(S(=O)(=O)[N-]c2nccs2)cc1)c1ccccc1</chem>                                                                          | -9.38         |
| <chem>NS(=O)(=O)c1cc2c(cc1Cl)NCNS2(=O)=O</chem>                                                                                    | -9.31         |

|                                                                                        |       |
|----------------------------------------------------------------------------------------|-------|
| <chem>O=C(Nc1ccc(S(=O)(=O)[N-]c2ncccn2)cc1)c1cccc1</chem>                              | -9.3  |
| <chem>O=C(Nc1ccc(S(=O)(=O)[N-]c2nccs2)cc1)c1cccc1Cl</chem>                             | -9.29 |
| <chem>O=C(Nc1ccc(S(=O)(=O)[N-]c2ncccn2)cc1)c1cccc([N+](=O)[O-])c1</chem>               | -9.28 |
| <chem>O=C(Nc1ccc(S(=O)(=O)[N-]c2nccs2)cc1)c1ccc(Cl)cc1</chem>                          | -9.22 |
| <chem>CCCC(=O)Nc1ccc(S(=O)(=O)[N-]c2ncccn2)cc1</chem>                                  | -9.2  |
| <chem>Nc1cccc(C(=O)Nc2ccc(S(=O)(=O)[N-]c3ncccn3)cc2)c1</chem>                          | -9.18 |
| <chem>CC(C)C(=O)Nc1ccc(S(=O)(=O)[N-]c2ncccn2)cc1</chem>                                | -9.16 |
| <chem>CC(C)(C)C(=O)Nc1ccc(S(=O)(=O)[N-]c2nccs2)cc1</chem>                              | -9.14 |
| <chem>COC(=O)CCCNS(=O)(=O)NCCc1cccc1</chem>                                            | -9.12 |
| <chem>O=S(=O)(NCCc1cccc1)Oc1cccc1O</chem>                                              | -9.1  |
| <chem>COC(=O)CCNS(=O)(=O)NCCc1cccc1</chem>                                             | -9.1  |
| <chem>CCCSc1ccc2nc(NC(=O)OC)[nH]c2c1</chem>                                            | -9.09 |
| <chem>CCC(=O)Nc1ccc(S(=O)(=O)[N-]c2nccs2)cc1</chem>                                    | -9.07 |
| <chem>Cc1ccc(C)c(OCCCC(C)(C)C(=O)Nc2ccc(S(=O)(=O)[N-]c3nccs3)cc2)c1</chem>             | -9.07 |
| <chem>CCCC(CCC)C(=O)Nc1ccc(S(=O)(=O)[N-]c2nccs2)cc1</chem>                             | -9.07 |
| <chem>O=[N+](O)c1nccn1CC(O)=NCCc1cccc1</chem>                                          | -9.02 |
| <chem>CCC(=O)Nc1ccc(S(=O)(=O)[N-]c2ncccn2)cc1</chem>                                   | -9.01 |
| <chem>CCCC(=O)Nc1ccc(S(=O)(=O)[N-]c2ncccn2)cc1</chem>                                  | -9    |
| <chem>CC(=O)Nc1ccc(S(=O)(=O)[N-]c2nccs2)cc1</chem>                                     | -8.99 |
| <chem>COC(=O)CCNS(=O)(=O)NCC12C[C@H]3C[C@@H](C1)C[C@@H](C2)C3</chem>                   | -8.97 |
| <chem>CC(=O)Nc1ccc(S(=O)(=O)[N-]c2ncccn2)cc1</chem>                                    | -8.91 |
| <chem>CCCC(=O)Nc1ccc(S(=O)(=O)[N-]c2nccs2)cc1</chem>                                   | -8.86 |
| <chem>O=C(Nc1ccc(S(=O)(=O)[N-]c2ncccn2)cc1)c1ccc(Cl)cc1</chem>                         | -8.85 |
| <chem>CCCCC(=O)Nc1ccc(S(=O)(=O)[N-]c2nccs2)cc1</chem>                                  | -8.84 |
| <chem>CCCCc1ncc(/C=C\Cc2ccs2)C(=O)[O-]n1Cc1ccc(C(=O)[O-])cc1</chem>                    | -8.81 |
| <chem>O=C(Nc1ccc(S(=O)(=O)[N-]c2ncccn2)cc1)c1cc([N+](=O)[O-])cc([N+](=O)[O-])c1</chem> | -8.81 |
| <chem>O=C(Nc1ccc(S(=O)(=O)[N-]c2nccs2)cc1)c1cc([N+](=O)[O-])cc([N+](=O)[O-])c1</chem>  | -8.8  |
| <chem>CCCC(=O)Nc1ccc(S(=O)(=O)[N-]c2nccs2)cc1</chem>                                   | -8.75 |
| <chem>CCCC(CCC)C(=O)Nc1ccc(S(=O)(=O)[N-]c2ncccn2)cc1</chem>                            | -8.68 |
| <chem>Nc1ccc(S(=O)(=O)[N-]c2nccs2)cc1</chem>                                           | -8.68 |
| <chem>O=C(Nc1ccc(S(=O)(=O)[N-]c2ncccn2)cc1)c1ccc([N+](=O)[O-])cc1</chem>               | -8.6  |
| <chem>Fc1ccc([C@@H]2CC[NH2+]C[C@H]2COc2ccc3c(c2)OCO3)cc1</chem>                        | -8.56 |
| <chem>COc1ccc(C(=O)Nc2ccc(S(=O)(=O)[N-]c3nccs3)cc2)cc1</chem>                          | -8.56 |
| <chem>COC(=O)CCCNS(=O)(=O)N[C@@H](C)c1cccc1</chem>                                     | -8.54 |
| <chem>C[C@H](NC(=O)C(C)(C)OC(C)(C)C(=O)N[C@@H](C)c1cccc1)c1cccc1</chem>                | -8.53 |
| <chem>COC(=O)CC[C@H](NS(=O)(=O)NCCc1cccc1)C(=O)OC</chem>                               | -8.5  |
| <chem>C=C1[C@@H](n2nc3c(=O)nc(N)[nH]c32)C[C@H](O)[C@H]1CO</chem>                       | -8.46 |
| <chem>CC(C)CNS(=O)(=O)NCC(C)C</chem>                                                   | -8.45 |
| <chem>O=C(Nc1ccc(S(=O)(=O)[N-]c2ncccn2)cc1)c1ccc(O)cc1</chem>                          | -8.43 |
| <chem>CCCCCNS(=O)(=O)NCCCCC</chem>                                                     | -8.41 |
| <chem>COC(=O)CCCNS(=O)(=O)NCCc1cccc1</chem>                                            | -8.39 |
| <chem>O=S(=O)(NCc1ccc(F)cc1)Oc1cccc1O</chem>                                           | -8.36 |
| <chem>Cc1ccc(C)c(OCCCC(C)(C)C(=O)Nc2c(C)cccc2C)c1</chem>                               | -8.33 |

|                                                                                           |       |
|-------------------------------------------------------------------------------------------|-------|
| C#C[C@]1(O)CC[C@H]2[C@@H]3CCc4cc(OC5CCCC5)ccc4[C@H]3C<br>C[C@@]21C                        | -8.32 |
| COc1ccc(C(=O)Nc2ccc(S(=O)(=O)[N-]c3nccn3)cc2)cc1                                          | -8.24 |
| COC(=O)[C@H](Cc1ccccc1)NS(=O)(=O)NCC(C)C                                                  | -8.23 |
| COC(=O)CCNS(=O)(=O)NCc1ccc(F)cc1                                                          | -8.23 |
| CCCCc1oc2ccccc2c1C(=O)c1cc(I)c(OCC[NH+](CC)CC)c(I)c1                                      | -8.2  |
| O=C(Nc1ccc(S(=O)(=O)[N-]c2nccs2)cc1)c1ccc(O)cc1                                           | -8.19 |
| CCOC(=O)[C@H](CCc1ccccc1)[NH2+][C@@H](C)C(=O)N1CCC[C@<br>H]1C(=O)[O-]                     | -8.18 |
| Cc1ccc(C)c1OC[C@H](C)NC(=O)[C@@H]1CCCN1C(=O)[C@H](C)[<br>NH2+][C@@H](CCc1ccccc1)C(=O)[O-] | -8.18 |
| Nc1ccc(S(N)(=O)=O)cc1                                                                     | -8.17 |
| O=C(/C=C/c1ccc(O)c(O)c1)Nc1ccc(S(=O)(=O)[N-]c2nccn2)cc1                                   | -8.14 |
| COC(=O)CCCNS(=O)(=O)NC(=O)[C@H]([NH3+])CC(C)C                                             | -8.13 |
| Cn1cc(NC(=O)C(O)(c2ccccc2)c2ccccc2)c(=O)n1-c1ccccc1                                       | -8.12 |
| CCCN(C(=O)c1ccccc1)                                                                       | -8.08 |
| COC(=O)CC[C@@H](NS(=O)(=O)NCc1ccccc1)C(=O)OC                                              | -8.07 |
| CCOC(=O)[C@H](CCc1ccccc1)[NH2+][C@H]1CCc2ccccc2N(CC(=O)[<br>O-])C1=O                      | -8.07 |
| COC(=O)CCNS(=O)(=O)N[C@@H](C)c1ccccc1                                                     | -8.07 |
| COC(=O)CCCNS(=O)(=O)N[C@H](C(=O)OC)C(C)C                                                  | -8.05 |
| Cc1ccccc1-<br>c1cc(N2CC[NH+](C)CC2)ncc1N(C)C(=O)C(C)(C)c1cc(C(F)(F)F)cc(C(F)<br>(F)F)c1   | -8.05 |
| C[C@@H](NC(=O)C(C)(C)OC(C)(C)C(=O)N[C@H](C)c1ccccc1)c1cccc<br>c1                          | -8.04 |
| Cc1ccc(C)c1NC(=O)[C@@H]1CCCN1C(=O)[C@H](C)[NH2+][C@@<br>H](CCc1ccccc1)C(=O)[O-]           | -8.03 |
| CCCN(CCC)C(=O)c1ccccc1                                                                    | -8.03 |
| CC(C)NS(=O)(=O)NC(C)C                                                                     | -8.02 |
| CCCCNS(=O)(=O)NCCCC                                                                       | -8.01 |
| C[C@H](NC(=O)C(C)(C)OC(C)(C)C(=O)N[C@H](C)c1ccccc1)c1ccccc1                               | -8    |
| COC(=O)[C@H](NS(=O)(=O)NCC(C)C)C(C)C                                                      | -7.97 |
| O=C(Nc1ccc(S(=O)(=O)[N-]c2nccs2)cc1)c1ccc([N+](=O)[O-])cc1                                | -7.96 |
| O=C(Nc1ccc(S(=O)(=O)[N-]c2nccs2)cc1)c1cc(O)c(O)c(O)c1                                     | -7.93 |
| CCCNS(=O)(=O)NCCC                                                                         | -7.92 |
| O=C(Nc1ccc(S(=O)(=O)[N-]c2nccn2)cc1)c1cc(O)c(O)c(O)c1                                     | -7.91 |
| CCCCCNS(=O)(=O)NCCCC(=O)OC                                                                | -7.9  |
| CCCCCNS(=O)(=O)NCCC(=O)OC                                                                 | -7.85 |
| Cc1ccc(C)c(OCCCC(C)(C)C(=O)NCC2CCCC2)c1                                                   | -7.81 |
| CC(C)N=c1cc2n(-c3ccc(Cl)cc3)c3ccccc3nc-2cc1Nc1ccc(Cl)cc1                                  | -7.74 |
| COC(=O)[C@H](Cc1ccccc1)NS(=O)(=O)NCc1ccc(F)cc1                                            | -7.74 |
| CCCCNS(=O)(=O)NCCCC(=O)OC                                                                 | -7.69 |
| COC(=O)CCCNS(=O)(=O)N[C@@H](Cc1ccccc1)C(=O)OC                                             | -7.67 |
| OC(Cn1cnen1)(Cn1cnen1)c1ccc(F)cc1F                                                        | -7.66 |
| COC(=O)[C@@H](NS(=O)(=O)NCc1ccc(F)cc1)C(C)C                                               | -7.64 |
| COC(=O)CCCNS(=O)(=O)NCC(C)C                                                               | -7.63 |
| Cc1ccc(C)c(OCCCC(C)(C)C(=O)N[C@@H](C)COc2c(C)cccc2C)c1                                    | -7.63 |

|                                                                                 |       |
|---------------------------------------------------------------------------------|-------|
| <chem>C[C@H](NC(=O)COCC(=O)N[C@H](C)c1ccccc1)c1ccccc1</chem>                    | -7.59 |
| <chem>Cc1ccccc1CNC(=O)C(C)(C)OC(C)(C)C(=O)NCc1ccccc1C</chem>                    | -7.58 |
| <chem>Cc1ccc(C)c(OCCCC(C)(C)C(=O)NCc2ccccc2)c1</chem>                           | -7.58 |
| <chem>COC(=O)CCNS(=O)(=O)NCC(C)C</chem>                                         | -7.57 |
| <chem>COC(=O)CCCNS(=O)(=O)NCC(N)=O</chem>                                       | -7.55 |
| <chem>COC(=O)CC[C@@H](NS(=O)(=O)NCC(C)C)C(=O)OC</chem>                          | -7.55 |
| <chem>CC(C)(OC(C)(C)C(=O)NCc1ccccc1)C(=O)NCc1ccccc1</chem>                      | -7.52 |
| <chem>CC(C)(OC(C)(C)C(=O)NCCc1ccccc1)C(=O)NCCc1ccccc1</chem>                    | -7.46 |
| <chem>C[NH2+][C@@]1(c2ccccc2C1)CCCC1=O</chem>                                   | -7.45 |
| <chem>CCCC(CCC)C(=O)OC(C)(C)C(=O)Nc1c(C)cccc1C</chem>                           | -7.44 |
| <chem>Cc1ccccc1CNC(=O)COCC(=O)NCc1ccccc1C</chem>                                | -7.4  |
| <chem>C[C@H]([NH2+][C@@H](CCc1ccccc1)C(=O)[O-])C(=O)N1CCC[C@H]1C(=O)[O-]</chem> | -7.36 |
| <chem>CC(=O)NCCc1c[nH]cn1</chem>                                                | -7.36 |
| <chem>C[C@H](NC(=O)C(C)(C)OC(=O)c1ccc(O)cc1)c1ccccc1</chem>                     | -7.29 |
| <chem>C[C@@H](NC(=O)/C=C/c1ccc(O)c(O)c1)c1ccccc1</chem>                         | -7.27 |
| <chem>C[C@H](NC(=O)/C=C/c1ccc(O)c(O)c1)c1ccccc1</chem>                          | -7.27 |
| <chem>COc1cc(N)c(Cl)cc1C(=O)N[C@@H]1CC[N@H+](CCCOc2ccc(F)cc2)C[C@@H]1OC</chem>  | -7.26 |
| <chem>COC(=O)CC[C@@H](NS(=O)(=O)NCC(N)=O)C(=O)OC</chem>                         | -7.25 |
| <chem>Cc1ccc(C)c(OCCCC(C)(C)C(=O)NCCc2ccccc2)c1</chem>                          | -7.25 |
| <chem>C[C@H](NC(=O)C(C)(C)OC(=O)c1ccc(O)cc1)c1ccccc1</chem>                     | -7.25 |
| <chem>CCCC(CCC)C(=O)OC(C)(C)C(=O)N[C@H](C)c1ccccc1</chem>                       | -7.24 |
| <chem>CC[NH+](CC)CCOC(=O)C1(C2CCCCC2)CCCCC1</chem>                              | -7.22 |
| <chem>CCCC(CCC)C(=O)OC(C)(C)C(=O)NCC1CCCCC1</chem>                              | -7.21 |
| <chem>CCCCCCNS(=O)(=O)N[C@H](CCC(=O)OC)C(=O)OC</chem>                           | -7.19 |
| <chem>COc1ccc2c(c1)c(CC(=O)[O-])c(C)n2C(=O)c1ccc(Cl)cc1</chem>                  | -7.17 |
| <chem>Nc1nc(=O)c2nnc(COCCO)c2[nH]1</chem>                                       | -7.16 |
| <chem>COC(=O)CC[C@@H](NS(=O)(=O)N[C@H](C)c1ccccc1)C(=O)OC</chem>                | -7.15 |
| <chem>CN1C(=O)[C@]2(NC(=O)c3ccccc3N2)c2ccccc21</chem>                           | -7.15 |
| <chem>COC(=O)CCCNS(=O)(=O)NCC(N)=O</chem>                                       | -7.14 |
| <chem>Cc1cccc(C)c1OC[C@H](C)NC(=O)/C=C/c1ccc(O)c(O)c1</chem>                    | -7.14 |
| <chem>CC[NH+](CC)CC(=O)Nc1c(C)cccc1C</chem>                                     | -7.13 |
| <chem>C[C@@H](NC(=O)c1ccccc1)c1ccccc1</chem>                                    | -7.11 |
| <chem>O=C(NCCc1ccccc1)c1ccc(F)cc1</chem>                                        | -7.09 |
| <chem>CC(C)[NH2+][C[C@H](O)COc1ccc2ccccc12</chem>                               | -7.09 |
| <chem>C[C@H](NC(=O)c1ccc(F)cc1)c1ccccc1</chem>                                  | -7.07 |
| <chem>O=C(/C=C/c1ccc(O)c(O)c1)NCCc1ccccc1</chem>                                | -7.05 |
| <chem>O=C(COCC(=O)NCc1ccccc1)NCc1ccccc1</chem>                                  | -7.04 |
| <chem>CC(C)(OC(=O)c1ccc(O)cc1)C(=O)NCc1ccccc1</chem>                            | -7.04 |
| <chem>O=C(NCCc1ccccc1)c1ccccc1</chem>                                           | -7.03 |
| <chem>CCCC(CCC)C(=O)OC(C)(C)C(=O)NCc1ccccc1</chem>                              | -7.03 |
| <chem>COCCOC(=O)C1=C(C)NC(C)=C(C(=O)OC(C)C)[C@H]1c1cccc([N+](=O)[O-])c1</chem>  | -7.02 |
| <chem>COC(=O)CCCNS(=O)(=O)Oc1ccccc1O</chem>                                     | -7.01 |
| <chem>COC(=O)CCCNS(=O)(=O)N[C@@H](C)C(=O)OC</chem>                              | -6.98 |
| <chem>O=C(COCC(=O)NCCc1ccccc1)NCCc1ccccc1</chem>                                | -6.98 |

|                                                                         |       |
|-------------------------------------------------------------------------|-------|
| <chem>CCCC(CCC)C(=O)OC(C)(C)C(=O)NCCc1ccccc1</chem>                     | -6.94 |
| <chem>CCCCNC(=O)NS(=O)(=O)c1ccc(C)cc1</chem>                            | -6.92 |
| <chem>CN1C(=O)CN=C(c2ccccc2)c2cc(Cl)ccc21</chem>                        | -6.91 |
| <chem>CC(C)(OC(C)(C)C(=O)NCc1ccc(F)cc1)C(=O)NCc1ccc(F)cc1</chem>        | -6.9  |
| <chem>COC(=O)CCCNS(=O)(=O)NCC(=O)OC</chem>                              | -6.9  |
| <chem>COC(=O)CC[C@H](NS(=O)(=O)NC(=O)[C@H]([NH3+])CC(C)C)C(=O)OC</chem> | -6.89 |
| <chem>COC(=O)CC[C@@H](NS(=O)(=O)NCC(N)=O)C(=O)OC</chem>                 | -6.88 |
| <chem>CCCNC(=O)NS(=O)(=O)c1ccc(Cl)cc1</chem>                            | -6.88 |
| <chem>O=C1NC(=O)C(c2ccccc2)(c2ccccc2)N1</chem>                          | -6.88 |
| <chem>O=C(COCC(=O)NCc1ccc(F)cc1)NCc1ccc(F)cc1</chem>                    | -6.86 |
| <chem>O=S(=O)(Nc1ccccc1)Nc1ccccc1</chem>                                | -6.84 |
| <chem>CCCCNS(=O)(=O)N[C@@H](CCC(=O)OC)C(=O)OC</chem>                    | -6.83 |
| <chem>CC(C)(OC(=O)c1ccc(O)cc1)C(=O)NCCc1ccccc1</chem>                   | -6.82 |
| <chem>CCCC(CCC)C(=O)OC(C)(C)C(=O)N[C@@H](C)c1ccccc1</chem>              | -6.8  |
| <chem>CCCC(CCC)C(=O)N[C@@H](C)COc1c(C)cccc1C</chem>                     | -6.79 |
| <chem>O=C(/C=C/c1ccc(O)c(O)c1)NCC1CCCCC1</chem>                         | -6.77 |
| <chem>O=C(NC1ccccc1)c1ccc(F)cc1</chem>                                  | -6.76 |
| <chem>O=C(NC1ccccc1)c1ccccc1</chem>                                     | -6.74 |
| <chem>COC(=O)CC[C@@H](NS(=O)(=O)N[C@H](C(=O)OC)C(C)C)C(=O)OC</chem>     | -6.66 |
| <chem>CCC1(c2ccccc2)C(=O)NC(=O)NC1=O</chem>                             | -6.6  |
| <chem>COc1cc2nc(N3CCN(C(=O)[C@@H]4COc5ccccc5O4)CC3)nc(N)c2cc1O</chem>   | -6.57 |
| <chem>O=C(NC1CCCCC1)c1ccccc1</chem>                                     | -6.55 |
| <chem>C[C@@H](c1ccccc1)N1C(=O)C(C)(C)OS1(=O)=O</chem>                   | -6.54 |
| <chem>NC(=O)N1c2ccccc2CC(=O)c2ccccc21</chem>                            | -6.52 |
| <chem>CC1(C)OS(=O)(=O)N(c2ccccc2)C1=O</chem>                            | -6.51 |
| <chem>CCCC(CCC)C(=O)N(c1ccccc1)c1ccccc1</chem>                          | -6.48 |
| <chem>CCCC(CCC)C(=O)NCCc1ccccc1</chem>                                  | -6.44 |
| <chem>O=C(NC1CCCCC1)c1ccc(F)cc1</chem>                                  | -6.36 |
| <chem>Cc1cccc(C)c1NC(=O)/C=C/c1ccc(O)c(O)c1</chem>                      | -6.35 |
| <chem>Cn1cc(NC(=O)C(C)(C)O)c(=O)n1-c1ccccc1</chem>                      | -6.34 |
| <chem>CCCC(CCC)C(=O)NC1CCCCC1</chem>                                    | -6.32 |
| <chem>CCCCCCNC(=O)c1ccccc1</chem>                                       | -6.29 |
| <chem>CCCCCCNC(=O)c1ccccc1</chem>                                       | -6.27 |
| <chem>C[NH2+][C@H](Cc1c[nH]c2ccccc12)C(=O)[O-]</chem>                   | -6.27 |
| <chem>O=C([O-])c1ccccc1[C@H]1COc2ccccc2C1</chem>                        | -6.26 |
| <chem>COC(=O)CC[C@H](NS(=O)(=O)N[C@@H](Cc1ccccc1)C(=O)OC)C(=O)OC</chem> | -6.24 |
| <chem>O=C(NC1CCCCC1)c1ccccc1</chem>                                     | -6.19 |
| <chem>O=C(NC1CCCCC1)c1ccc(F)cc1</chem>                                  | -6.19 |
| <chem>COC(=O)CC[C@H](NS(=O)(=O)NCC(=O)OC)C(=O)OC</chem>                 | -6.18 |
| <chem>CCCCCCNC(=O)c1ccc(F)cc1</chem>                                    | -6.18 |
| <chem>Cc1ccc(C)c(OCCCC(C)(C)C(=O)[O-])c1</chem>                         | -6.17 |
| <chem>CC1(C)CC2(C(N)=O)CCC1CC2</chem>                                   | -6.17 |
| <chem>CCCCCCNC(=O)c1ccc(F)cc1</chem>                                    | -6.13 |



|                                                                                                                  |       |
|------------------------------------------------------------------------------------------------------------------|-------|
| <chem>O=C(/C=C/c1ccc(O)c(O)c1)Oc1ccccc1</chem>                                                                   | -6.1  |
| <chem>CCC[C@H](C)C1(CC)C(=O)NC(=O)NC1=O</chem>                                                                   | -6.01 |
| <chem>CC(C)Cc1ccc([C@@H](C)C(=O)[O-])cc1</chem>                                                                  | -6    |
| <chem>COC(=O)CC[C@H](NS(=O)(=O)N[C@H](C)C(=O)OC)C(=O)OC</chem>                                                   | -5.98 |
| <chem>CCCCNc1ccc(C(=O)OCC[NH+](C)C)cc1</chem>                                                                    | -5.94 |
| <chem>Cc1cccc(C)c1OC[C@H](C)[NH3+]</chem>                                                                        | -5.92 |
| <chem>CCCC(CCC)C(=O)Nc1ccccc1</chem>                                                                             | -5.89 |
| <chem>O=C(Nc1ccccc1)c1ccccc1</chem>                                                                              | -5.81 |
| <chem>O=C(Nc1ccccc1)c1ccc(F)cc1</chem>                                                                           | -5.8  |
| <chem>CC(C)(C)OC(=O)/C=C/c1ccc(O)c(O)c1</chem>                                                                   | -5.73 |
| <chem>CC(C)CNC(=O)c1ccccc1</chem>                                                                                | -5.71 |
| <chem>COC(=O)C1=C(C)NC(C)=C(C(=O)OC)C1c1ccccc1[N+](=O)[O-]</chem>                                                | -5.69 |
| <chem>CCCCNIC(=O)C(C)(C)OS1(=O)=O</chem>                                                                         | -5.66 |
| <chem>CCCCNC(=O)c1ccccc1</chem>                                                                                  | -5.65 |
| <chem>CCCCNC(=O)c1ccccc1</chem>                                                                                  | -5.64 |
| <chem>CC(C)CNC(=O)c1ccc(F)cc1</chem>                                                                             | -5.61 |
| <chem>COc1cc2c(c(OC)c1OC)-c1ccc(OC)c(=O)cc1[C@H](NC(C)=O)CC2</chem>                                              | -5.58 |
| <chem>CCC1(CC)C(=O)NC(=O)NC1=O</chem>                                                                            | -5.55 |
| <chem>NC(=O)NCCC[C@H]([NH3+])C(=O)[O-]</chem>                                                                    | -5.54 |
| <chem>CCCCNC(=O)c1ccc(F)cc1</chem>                                                                               | -5.51 |
| <chem>CCCCNC(=O)c1ccc(F)cc1</chem>                                                                               | -5.51 |
| <chem>Cc1ccc1C(=O)N[C@H](C)C(C)(C)C</chem>                                                                       | -5.49 |
| <chem>CC(C)NC(=O)c1ccccc1</chem>                                                                                 | -5.45 |
| <chem>CC(C)(O)[C@H]1[C@@H]2C(=O)O[C@H]1[C@H]1OC(=O)[C@@]34O[C@@H]3C[C@]2(O)[C@@]14C</chem>                       | -5.41 |
| <chem>CC(C)NC(=O)c1ccc(F)cc1</chem>                                                                              | -5.39 |
| <chem>C1C[NH2+]CC[NH2+]1</chem>                                                                                  | -5.23 |
| <chem>CC(C)OC(=O)/C=C/c1ccc(O)c(O)c1</chem>                                                                      | -5.19 |
| <chem>CCCC(CCC)C(=O)NCC(C)C</chem>                                                                               | -5.17 |
| <chem>CCCCOC(=O)/C=C/c1ccc(O)c(O)c1</chem>                                                                       | -5.14 |
| <chem>CC[C@H](C(=O)[O-])c1ccccc1</chem>                                                                          | -5.09 |
| <chem>O=C([O-])/C=C/c1ccc(O)cc1</chem>                                                                           | -5.06 |
| <chem>O=C([O-])CCCC[C@H]1CCSS1</chem>                                                                            | -5.01 |
| <chem>CC[C@@H](C(N)=O)N1CCCC1=O</chem>                                                                           | -5    |
| <chem>CCCC(CCC)C(=O)NC(C)C</chem>                                                                                | -4.96 |
| <chem>COC(=O)CC[C@H](N[S@](=O)Oc1ccccc1O)C(=O)OC</chem>                                                          | -4.93 |
| <chem>CCCCNC(=O)C(CCC)CCC</chem>                                                                                 | -4.9  |
| <chem>CC(C)=C[C@H]1[C@@H](C(=O)[O-])C1(C)C</chem>                                                                | -4.87 |
| <chem>CCCCN(CCCC)S(=O)(=O)N(CCCC)CCCC</chem>                                                                     | -4.86 |
| <chem>O=C([O-])/C=C/c1ccc(O)c(O)c1</chem>                                                                        | -4.85 |
| <chem>CC(=O)NCCCS(=O)(=O)[O-]</chem>                                                                             | -4.76 |
| <chem>COC(=O)/C=C/c1ccc(O)c(O)c1</chem>                                                                          | -4.76 |
| <chem>CCCOC(=O)/C=C/c1ccc(O)c(O)c1</chem>                                                                        | -4.76 |
| <chem>O=C([O-])CCCCCCCC(=O)[O-]</chem>                                                                           | -4.75 |
| <chem>CO[C@@H]1[C@@H](OC(N)=O)[C@@H](O)[C@H](Oc2ccc3c(O)c(NC(=O)c4ccc(O)c(CC=C(C)C)c4)c(=O)oc3c2C)OC1(C)C</chem> | -4.68 |
| <chem>CC[C@H](C)[C@H](NC(=O)OC(C)(C)C)C(=O)[O-]</chem>                                                           | -4.66 |

|                                                                                                                                |       |
|--------------------------------------------------------------------------------------------------------------------------------|-------|
| <chem>COC(=O)c1ccc(O)cc1</chem>                                                                                                | -4.66 |
| <chem>CCCNC(=O)C(CCC)CCC</chem>                                                                                                | -4.65 |
| <chem>O=C([O-])C1(O)CCCCC1</chem>                                                                                              | -4.57 |
| <chem>CCCOC(=O)c1ccc(O)cc1</chem>                                                                                              | -4.26 |
| <chem>OC[C@@H](O)[C@@H](O)[C@H](O)[C@H](O)CO</chem>                                                                            | -4.04 |
| <chem>OC[C@H](O)[C@@H](O)[C@H](O)[C@H](O)CO</chem>                                                                             | -3.88 |
| <chem>CC[C@@H]([C@H](C)O)n1ncn(-<br/>c2ccc(N3CCN(c4ccc(OC[C@@H]5CO[C@@](Cn6cncn6)(c6ccc(F)cc6F)<br/>C5)cc4)CC3)cc2)c1=O</chem> | -2.96 |

Table S3

| Snap           | Pearson's R  |              | Kendall's Tau B |              | Spearman's Rho |              |
|----------------|--------------|--------------|-----------------|--------------|----------------|--------------|
|                | Mean         | STD          | Mean            | STD          | Mean           | STD          |
| 10595_r        | 0.492        | 0.061        | 0.300           | 0.053        | 0.476          | 0.072        |
| 12684_r        | 0.441        | 0.057        | 0.295           | 0.050        | 0.469          | 0.071        |
| 1554_r         | 0.588        | 0.067        | 0.350           | 0.063        | 0.516          | 0.081        |
| 15589_r        | 0.214        | 0.058        | 0.244           | 0.056        | 0.401          | 0.081        |
| <b>17423_r</b> | <b>0.615</b> | <b>0.053</b> | <b>0.417</b>    | <b>0.058</b> | <b>0.607</b>   | <b>0.070</b> |
| 18985_r        | 0.472        | 0.065        | 0.325           | 0.054        | 0.502          | 0.072        |
| 22514_r        | 0.458        | 0.066        | 0.341           | 0.054        | 0.519          | 0.070        |
| 307_r          | 0.583        | 0.062        | 0.384           | 0.056        | 0.567          | 0.071        |
| 3513_r         | 0.365        | 0.066        | 0.243           | 0.056        | 0.386          | 0.080        |
| 5747_r         | 0.255        | 0.058        | 0.214           | 0.047        | 0.375          | 0.074        |

Coordinates of the TcCA model

|      |    |      |     |   |        |        |        |      |      |   |
|------|----|------|-----|---|--------|--------|--------|------|------|---|
| ATOM | 1  | N    | GLN | 1 | 49.783 | 17.833 | 36.038 | 1.00 | 0.00 | N |
| ATOM | 2  | H1   | GLN | 1 | 50.699 | 17.943 | 36.450 | 1.00 | 0.00 | H |
| ATOM | 3  | H2   | GLN | 1 | 49.258 | 17.157 | 36.576 | 1.00 | 0.00 | H |
| ATOM | 4  | H3   | GLN | 1 | 49.880 | 17.506 | 35.087 | 1.00 | 0.00 | H |
| ATOM | 5  | CA   | GLN | 1 | 49.092 | 19.093 | 36.052 | 1.00 | 0.00 | C |
| ATOM | 6  | HA   | GLN | 1 | 49.676 | 19.837 | 35.509 | 1.00 | 0.00 | H |
| ATOM | 7  | CB   | GLN | 1 | 47.694 | 18.999 | 35.435 | 1.00 | 0.00 | C |
| ATOM | 8  | HB2  | GLN | 1 | 47.787 | 18.753 | 34.376 | 1.00 | 0.00 | H |
| ATOM | 9  | HB3  | GLN | 1 | 47.158 | 18.179 | 35.916 | 1.00 | 0.00 | H |
| ATOM | 10 | CG   | GLN | 1 | 46.856 | 20.255 | 35.598 | 1.00 | 0.00 | C |
| ATOM | 11 | HG2  | GLN | 1 | 45.858 | 20.047 | 35.210 | 1.00 | 0.00 | H |
| ATOM | 12 | HG3  | GLN | 1 | 46.750 | 20.512 | 36.652 | 1.00 | 0.00 | H |
| ATOM | 13 | CD   | GLN | 1 | 47.422 | 21.433 | 34.829 | 1.00 | 0.00 | C |
| ATOM | 14 | OE1  | GLN | 1 | 47.697 | 22.523 | 35.537 | 1.00 | 0.00 | O |
| ATOM | 15 | NE2  | GLN | 1 | 47.611 | 21.365 | 33.612 | 1.00 | 0.00 | N |
| ATOM | 16 | HE21 | GLN | 1 | 47.353 | 20.539 | 33.095 | 1.00 | 0.00 | H |
| ATOM | 17 | HE22 | GLN | 1 | 47.970 | 22.178 | 33.132 | 1.00 | 0.00 | H |
| ATOM | 18 | C    | GLN | 1 | 49.031 | 19.471 | 37.501 | 1.00 | 0.00 | C |
| ATOM | 19 | O    | GLN | 1 | 48.649 | 18.721 | 38.402 | 1.00 | 0.00 | O |
| ATOM | 20 | N    | TRP | 2 | 49.531 | 20.660 | 37.830 | 1.00 | 0.00 | N |
| ATOM | 21 | H    | TRP | 2 | 49.876 | 21.295 | 37.123 | 1.00 | 0.00 | H |
| ATOM | 22 | CA   | TRP | 2 | 49.423 | 21.151 | 39.219 | 1.00 | 0.00 | C |
| ATOM | 23 | HA   | TRP | 2 | 49.552 | 20.322 | 39.911 | 1.00 | 0.00 | H |
| ATOM | 24 | CB   | TRP | 2 | 50.545 | 22.155 | 39.488 | 1.00 | 0.00 | C |
| ATOM | 25 | HB2  | TRP | 2 | 50.584 | 22.883 | 38.676 | 1.00 | 0.00 | H |
| ATOM | 26 | HB3  | TRP | 2 | 50.321 | 22.697 | 40.406 | 1.00 | 0.00 | H |
| ATOM | 27 | CG   | TRP | 2 | 51.891 | 21.517 | 39.658 | 1.00 | 0.00 | C |
| ATOM | 28 | CD1  | TRP | 2 | 52.147 | 20.275 | 40.156 | 1.00 | 0.00 | C |

|      |    |         |   |        |        |        |      |      |   |
|------|----|---------|---|--------|--------|--------|------|------|---|
| ATOM | 29 | HD1 TRP | 2 | 51.410 | 19.583 | 40.531 | 1.00 | 0.00 | H |
| ATOM | 30 | NE1 TRP | 2 | 53.499 | 20.036 | 40.160 | 1.00 | 0.00 | N |
| ATOM | 31 | HE1 TRP | 2 | 53.927 | 19.180 | 40.484 | 1.00 | 0.00 | H |
| ATOM | 32 | CE2 TRP | 2 | 54.146 | 21.135 | 39.654 | 1.00 | 0.00 | C |
| ATOM | 33 | CZ2 TRP | 2 | 55.499 | 21.366 | 39.462 | 1.00 | 0.00 | C |
| ATOM | 34 | HZ2 TRP | 2 | 56.237 | 20.627 | 39.735 | 1.00 | 0.00 | H |
| ATOM | 35 | CH2 TRP | 2 | 55.872 | 22.597 | 38.921 | 1.00 | 0.00 | C |
| ATOM | 36 | HH2 TRP | 2 | 56.918 | 22.802 | 38.746 | 1.00 | 0.00 | H |
| ATOM | 37 | CZ3 TRP | 2 | 54.939 | 23.548 | 38.593 | 1.00 | 0.00 | C |
| ATOM | 38 | HZ3 TRP | 2 | 55.263 | 24.488 | 38.170 | 1.00 | 0.00 | H |
| ATOM | 39 | CE3 TRP | 2 | 53.583 | 23.317 | 38.786 | 1.00 | 0.00 | C |
| ATOM | 40 | HE3 TRP | 2 | 52.857 | 24.079 | 38.544 | 1.00 | 0.00 | H |
| ATOM | 41 | CD2 TRP | 2 | 53.179 | 22.090 | 39.327 | 1.00 | 0.00 | C |
| ATOM | 42 | C TRP   | 2 | 48.091 | 21.808 | 39.594 | 1.00 | 0.00 | C |
| ATOM | 43 | O TRP   | 2 | 47.510 | 22.554 | 38.785 | 1.00 | 0.00 | O |
| ATOM | 44 | N GLY   | 3 | 47.627 | 21.732 | 40.796 | 1.00 | 0.00 | N |
| ATOM | 45 | H GLY   | 3 | 48.176 | 21.176 | 41.436 | 1.00 | 0.00 | H |
| ATOM | 46 | CA GLY  | 3 | 46.456 | 22.309 | 41.396 | 1.00 | 0.00 | C |
| ATOM | 47 | HA2 GLY | 3 | 46.584 | 23.384 | 41.514 | 1.00 | 0.00 | H |
| ATOM | 48 | HA3 GLY | 3 | 45.612 | 22.076 | 40.756 | 1.00 | 0.00 | H |
| ATOM | 49 | C GLY   | 3 | 46.200 | 21.645 | 42.806 | 1.00 | 0.00 | C |
| ATOM | 50 | O GLY   | 3 | 46.960 | 20.825 | 43.316 | 1.00 | 0.00 | O |
| ATOM | 51 | N TYR   | 4 | 45.075 | 22.045 | 43.429 | 1.00 | 0.00 | N |
| ATOM | 52 | H TYR   | 4 | 44.488 | 22.737 | 42.989 | 1.00 | 0.00 | H |
| ATOM | 53 | CA TYR  | 4 | 44.689 | 21.571 | 44.754 | 1.00 | 0.00 | C |
| ATOM | 54 | HA TYR  | 4 | 45.579 | 21.538 | 45.383 | 1.00 | 0.00 | H |
| ATOM | 55 | CB TYR  | 4 | 43.720 | 22.571 | 45.390 | 1.00 | 0.00 | C |
| ATOM | 56 | HB2 TYR | 4 | 42.942 | 22.829 | 44.669 | 1.00 | 0.00 | H |
| ATOM | 57 | HB3 TYR | 4 | 43.213 | 22.128 | 46.247 | 1.00 | 0.00 | H |
| ATOM | 58 | CG TYR  | 4 | 44.389 | 23.829 | 45.899 | 1.00 | 0.00 | C |

|      |    |      |     |   |        |        |        |      |      |   |
|------|----|------|-----|---|--------|--------|--------|------|------|---|
| ATOM | 59 | CD1  | TYR | 4 | 44.299 | 25.006 | 45.170 | 1.00 | 0.00 | C |
| ATOM | 60 | HD1  | TYR | 4 | 43.765 | 25.019 | 44.236 | 1.00 | 0.00 | H |
| ATOM | 61 | CE1  | TYR | 4 | 44.910 | 26.155 | 45.635 | 1.00 | 0.00 | C |
| ATOM | 62 | HE1  | TYR | 4 | 44.848 | 27.072 | 45.069 | 1.00 | 0.00 | H |
| ATOM | 63 | CZ   | TYR | 4 | 45.612 | 26.125 | 46.834 | 1.00 | 0.00 | C |
| ATOM | 64 | OH   | TYR | 4 | 46.220 | 27.269 | 47.298 | 1.00 | 0.00 | O |
| ATOM | 65 | HH   | TYR | 4 | 46.621 | 27.163 | 48.170 | 1.00 | 0.00 | H |
| ATOM | 66 | CE2  | TYR | 4 | 45.701 | 24.954 | 47.560 | 1.00 | 0.00 | C |
| ATOM | 67 | HE2  | TYR | 4 | 46.244 | 24.942 | 48.492 | 1.00 | 0.00 | H |
| ATOM | 68 | CD2  | TYR | 4 | 45.091 | 23.806 | 47.095 | 1.00 | 0.00 | C |
| ATOM | 69 | HD2  | TYR | 4 | 45.170 | 22.894 | 47.667 | 1.00 | 0.00 | H |
| ATOM | 70 | C    | TYR | 4 | 44.068 | 20.185 | 44.786 | 1.00 | 0.00 | C |
| ATOM | 71 | O    | TYR | 4 | 43.948 | 19.512 | 43.767 | 1.00 | 0.00 | O |
| ATOM | 72 | N    | THR | 5 | 43.786 | 19.685 | 46.036 | 1.00 | 0.00 | N |
| ATOM | 73 | H    | THR | 5 | 43.944 | 20.292 | 46.828 | 1.00 | 0.00 | H |
| ATOM | 74 | CA   | THR | 5 | 43.350 | 18.370 | 46.342 | 1.00 | 0.00 | C |
| ATOM | 75 | HA   | THR | 5 | 43.095 | 18.353 | 47.402 | 1.00 | 0.00 | H |
| ATOM | 76 | CB   | THR | 5 | 42.070 | 18.057 | 45.545 | 1.00 | 0.00 | C |
| ATOM | 77 | HB   | THR | 5 | 42.232 | 18.122 | 44.472 | 1.00 | 0.00 | H |
| ATOM | 78 | CG2  | THR | 5 | 41.596 | 16.641 | 45.832 | 1.00 | 0.00 | C |
| ATOM | 79 | HG21 | THR | 5 | 40.592 | 16.509 | 45.425 | 1.00 | 0.00 | H |
| ATOM | 80 | HG22 | THR | 5 | 42.244 | 15.907 | 45.353 | 1.00 | 0.00 | H |
| ATOM | 81 | HG23 | THR | 5 | 41.566 | 16.460 | 46.907 | 1.00 | 0.00 | H |
| ATOM | 82 | OG1  | THR | 5 | 41.039 | 18.985 | 45.908 | 1.00 | 0.00 | O |
| ATOM | 83 | HG1  | THR | 5 | 40.839 | 18.861 | 46.840 | 1.00 | 0.00 | H |
| ATOM | 84 | C    | THR | 5 | 44.325 | 17.272 | 46.110 | 1.00 | 0.00 | C |
| ATOM | 85 | O    | THR | 5 | 44.674 | 16.477 | 47.017 | 1.00 | 0.00 | O |
| ATOM | 86 | N    | ASN | 6 | 44.965 | 17.202 | 44.972 | 1.00 | 0.00 | N |
| ATOM | 87 | H    | ASN | 6 | 44.705 | 17.861 | 44.253 | 1.00 | 0.00 | H |
| ATOM | 88 | CA   | ASN | 6 | 46.079 | 16.325 | 44.647 | 1.00 | 0.00 | C |

|      |     |      |     |   |        |        |        |      |      |   |
|------|-----|------|-----|---|--------|--------|--------|------|------|---|
| ATOM | 89  | HA   | ASN | 6 | 46.011 | 15.423 | 45.257 | 1.00 | 0.00 | H |
| ATOM | 90  | CB   | ASN | 6 | 46.008 | 15.914 | 43.188 | 1.00 | 0.00 | C |
| ATOM | 91  | HB2  | ASN | 6 | 46.022 | 16.802 | 42.552 | 1.00 | 0.00 | H |
| ATOM | 92  | HB3  | ASN | 6 | 46.873 | 15.294 | 42.946 | 1.00 | 0.00 | H |
| ATOM | 93  | CG   | ASN | 6 | 44.787 | 15.094 | 42.877 | 1.00 | 0.00 | C |
| ATOM | 94  | OD1  | ASN | 6 | 44.187 | 15.348 | 41.742 | 1.00 | 0.00 | O |
| ATOM | 95  | ND2  | ASN | 6 | 44.387 | 14.230 | 43.666 | 1.00 | 0.00 | N |
| ATOM | 96  | HD21 | ASN | 6 | 43.523 | 13.750 | 43.464 | 1.00 | 0.00 | H |
| ATOM | 97  | HD22 | ASN | 6 | 44.919 | 13.997 | 44.489 | 1.00 | 0.00 | H |
| ATOM | 98  | C    | ASN | 6 | 47.430 | 16.927 | 44.943 | 1.00 | 0.00 | C |
| ATOM | 99  | O    | ASN | 6 | 48.213 | 17.123 | 44.035 | 1.00 | 0.00 | O |
| ATOM | 100 | N    | LEU | 7 | 47.712 | 17.314 | 46.190 | 1.00 | 0.00 | N |
| ATOM | 101 | H    | LEU | 7 | 47.036 | 17.156 | 46.925 | 1.00 | 0.00 | H |
| ATOM | 102 | CA   | LEU | 7 | 48.945 | 18.093 | 46.521 | 1.00 | 0.00 | C |
| ATOM | 103 | HA   | LEU | 7 | 49.001 | 18.955 | 45.855 | 1.00 | 0.00 | H |
| ATOM | 104 | CB   | LEU | 7 | 48.874 | 18.598 | 47.967 | 1.00 | 0.00 | C |
| ATOM | 105 | HB2  | LEU | 7 | 48.368 | 17.850 | 48.581 | 1.00 | 0.00 | H |
| ATOM | 106 | HB3  | LEU | 7 | 49.887 | 18.694 | 48.361 | 1.00 | 0.00 | H |
| ATOM | 107 | CG   | LEU | 7 | 48.208 | 19.966 | 48.162 | 1.00 | 0.00 | C |
| ATOM | 108 | HG   | LEU | 7 | 48.807 | 20.725 | 47.664 | 1.00 | 0.00 | H |
| ATOM | 109 | CD1  | LEU | 7 | 46.817 | 19.947 | 47.543 | 1.00 | 0.00 | C |
| ATOM | 110 | HD11 | LEU | 7 | 46.306 | 20.877 | 47.786 | 1.00 | 0.00 | H |
| ATOM | 111 | HD12 | LEU | 7 | 46.884 | 19.876 | 46.458 | 1.00 | 0.00 | H |
| ATOM | 112 | HD13 | LEU | 7 | 46.235 | 19.114 | 47.939 | 1.00 | 0.00 | H |
| ATOM | 113 | CD2  | LEU | 7 | 48.142 | 20.292 | 49.647 | 1.00 | 0.00 | C |
| ATOM | 114 | HD21 | LEU | 7 | 47.699 | 21.279 | 49.786 | 1.00 | 0.00 | H |
| ATOM | 115 | HD22 | LEU | 7 | 47.540 | 19.552 | 50.175 | 1.00 | 0.00 | H |
| ATOM | 116 | HD23 | LEU | 7 | 49.149 | 20.301 | 50.064 | 1.00 | 0.00 | H |
| ATOM | 117 | C    | LEU | 7 | 50.239 | 17.337 | 46.357 | 1.00 | 0.00 | C |
| ATOM | 118 | O    | LEU | 7 | 51.377 | 17.756 | 46.376 | 1.00 | 0.00 | O |

|      |     |      |     |    |        |        |        |      |      |   |
|------|-----|------|-----|----|--------|--------|--------|------|------|---|
| ATOM | 119 | N    | THR | 8  | 50.173 | 15.981 | 46.318 | 1.00 | 0.00 | N |
| ATOM | 120 | H    | THR | 8  | 49.276 | 15.518 | 46.351 | 1.00 | 0.00 | H |
| ATOM | 121 | CA   | THR | 8  | 51.402 | 15.121 | 46.126 | 1.00 | 0.00 | C |
| ATOM | 122 | HA   | THR | 8  | 52.128 | 15.387 | 46.896 | 1.00 | 0.00 | H |
| ATOM | 123 | CB   | THR | 8  | 51.043 | 13.635 | 46.310 | 1.00 | 0.00 | C |
| ATOM | 124 | HB   | THR | 8  | 51.939 | 13.031 | 46.167 | 1.00 | 0.00 | H |
| ATOM | 125 | CG2  | THR | 8  | 50.497 | 13.387 | 47.708 | 1.00 | 0.00 | C |
| ATOM | 126 | HG21 | THR | 8  | 50.362 | 12.316 | 47.859 | 1.00 | 0.00 | H |
| ATOM | 127 | HG22 | THR | 8  | 51.202 | 13.759 | 48.453 | 1.00 | 0.00 | H |
| ATOM | 128 | HG23 | THR | 8  | 49.535 | 13.883 | 47.843 | 1.00 | 0.00 | H |
| ATOM | 129 | OG1  | THR | 8  | 50.056 | 13.255 | 45.342 | 1.00 | 0.00 | O |
| ATOM | 130 | HG1  | THR | 8  | 50.189 | 12.329 | 45.123 | 1.00 | 0.00 | H |
| ATOM | 131 | C    | THR | 8  | 52.112 | 15.312 | 44.717 | 1.00 | 0.00 | C |
| ATOM | 132 | O    | THR | 8  | 53.220 | 14.838 | 44.612 | 1.00 | 0.00 | O |
| ATOM | 133 | N    | ALA | 9  | 51.457 | 15.975 | 43.768 | 1.00 | 0.00 | N |
| ATOM | 134 | H    | ALA | 9  | 50.524 | 16.323 | 43.936 | 1.00 | 0.00 | H |
| ATOM | 135 | CA   | ALA | 9  | 52.088 | 16.252 | 42.515 | 1.00 | 0.00 | C |
| ATOM | 136 | HA   | ALA | 9  | 52.722 | 15.413 | 42.225 | 1.00 | 0.00 | H |
| ATOM | 137 | CB   | ALA | 9  | 50.929 | 16.362 | 41.488 | 1.00 | 0.00 | C |
| ATOM | 138 | HB1  | ALA | 9  | 51.340 | 16.546 | 40.495 | 1.00 | 0.00 | H |
| ATOM | 139 | HB2  | ALA | 9  | 50.359 | 15.432 | 41.468 | 1.00 | 0.00 | H |
| ATOM | 140 | HB3  | ALA | 9  | 50.267 | 17.187 | 41.758 | 1.00 | 0.00 | H |
| ATOM | 141 | C    | ALA | 9  | 52.973 | 17.522 | 42.638 | 1.00 | 0.00 | C |
| ATOM | 142 | O    | ALA | 9  | 53.651 | 17.771 | 41.637 | 1.00 | 0.00 | O |
| ATOM | 143 | N    | TRP | 10 | 52.945 | 18.231 | 43.759 | 1.00 | 0.00 | N |
| ATOM | 144 | H    | TRP | 10 | 52.379 | 17.912 | 44.532 | 1.00 | 0.00 | H |
| ATOM | 145 | CA   | TRP | 10 | 53.644 | 19.508 | 43.923 | 1.00 | 0.00 | C |
| ATOM | 146 | HA   | TRP | 10 | 53.509 | 20.083 | 43.009 | 1.00 | 0.00 | H |
| ATOM | 147 | CB   | TRP | 10 | 53.010 | 20.292 | 45.074 | 1.00 | 0.00 | C |
| ATOM | 148 | HB2  | TRP | 10 | 53.038 | 19.697 | 45.986 | 1.00 | 0.00 | H |



|      |     |         |    |        |        |        |      |      |   |
|------|-----|---------|----|--------|--------|--------|------|------|---|
| ATOM | 149 | HB3 TRP | 10 | 53.601 | 21.191 | 45.253 | 1.00 | 0.00 | H |
| ATOM | 150 | CG TRP  | 10 | 51.602 | 20.726 | 44.798 | 1.00 | 0.00 | C |
| ATOM | 151 | CD1 TRP | 10 | 50.807 | 20.309 | 43.773 | 1.00 | 0.00 | C |
| ATOM | 152 | HD1 TRP | 10 | 51.080 | 19.624 | 42.988 | 1.00 | 0.00 | H |
| ATOM | 153 | NE1 TRP | 10 | 49.582 | 20.925 | 43.844 | 1.00 | 0.00 | N |
| ATOM | 154 | HE1 TRP | 10 | 48.817 | 20.742 | 43.213 | 1.00 | 0.00 | H |
| ATOM | 155 | CE2 TRP | 10 | 49.566 | 21.759 | 44.933 | 1.00 | 0.00 | C |
| ATOM | 156 | CZ2 TRP | 10 | 48.561 | 22.585 | 45.412 | 1.00 | 0.00 | C |
| ATOM | 157 | HZ2 TRP | 10 | 47.609 | 22.676 | 44.918 | 1.00 | 0.00 | H |
| ATOM | 158 | CH2 TRP | 10 | 48.833 | 23.332 | 46.558 | 1.00 | 0.00 | C |
| ATOM | 159 | HH2 TRP | 10 | 48.076 | 23.988 | 46.954 | 1.00 | 0.00 | H |
| ATOM | 160 | CZ3 TRP | 10 | 50.048 | 23.258 | 47.191 | 1.00 | 0.00 | C |
| ATOM | 161 | HZ3 TRP | 10 | 50.206 | 23.851 | 48.071 | 1.00 | 0.00 | H |
| ATOM | 162 | CE3 TRP | 10 | 51.056 | 22.431 | 46.710 | 1.00 | 0.00 | C |
| ATOM | 163 | HE3 TRP | 10 | 52.014 | 22.384 | 47.208 | 1.00 | 0.00 | H |
| ATOM | 164 | CD2 TRP | 10 | 50.811 | 21.669 | 45.561 | 1.00 | 0.00 | C |
| ATOM | 165 | C TRP   | 10 | 55.180 | 19.327 | 44.187 | 1.00 | 0.00 | C |
| ATOM | 166 | O TRP   | 10 | 55.529 | 18.263 | 44.699 | 1.00 | 0.00 | O |
| ATOM | 167 | N PRO   | 11 | 56.015 | 20.309 | 43.829 | 1.00 | 0.00 | N |
| ATOM | 168 | CD PRO  | 11 | 55.669 | 21.565 | 43.138 | 1.00 | 0.00 | C |
| ATOM | 169 | HD2 PRO | 11 | 55.264 | 22.282 | 43.853 | 1.00 | 0.00 | H |
| ATOM | 170 | HD3 PRO | 11 | 54.987 | 21.411 | 42.304 | 1.00 | 0.00 | H |
| ATOM | 171 | CG PRO  | 11 | 57.011 | 22.031 | 42.640 | 1.00 | 0.00 | C |
| ATOM | 172 | HG2 PRO | 11 | 57.027 | 23.108 | 42.493 | 1.00 | 0.00 | H |
| ATOM | 173 | HG3 PRO | 11 | 57.252 | 21.526 | 41.705 | 1.00 | 0.00 | H |
| ATOM | 174 | CB PRO  | 11 | 57.971 | 21.589 | 43.691 | 1.00 | 0.00 | C |
| ATOM | 175 | HB2 PRO | 11 | 57.925 | 22.284 | 44.532 | 1.00 | 0.00 | H |
| ATOM | 176 | HB3 PRO | 11 | 58.990 | 21.534 | 43.306 | 1.00 | 0.00 | H |
| ATOM | 177 | CA PRO  | 11 | 57.456 | 20.209 | 44.114 | 1.00 | 0.00 | C |
| ATOM | 178 | HA PRO  | 11 | 57.896 | 19.438 | 43.480 | 1.00 | 0.00 | H |

|      |     |     |     |    |        |        |        |      |      |   |
|------|-----|-----|-----|----|--------|--------|--------|------|------|---|
| ATOM | 179 | C   | PRO | 11 | 57.767 | 19.928 | 45.596 | 1.00 | 0.00 | C |
| ATOM | 180 | O   | PRO | 11 | 57.009 | 20.400 | 46.449 | 1.00 | 0.00 | O |
| ATOM | 181 | N   | LYS | 12 | 58.788 | 19.020 | 45.934 | 1.00 | 0.00 | N |
| ATOM | 182 | H   | LYS | 12 | 59.321 | 18.631 | 45.170 | 1.00 | 0.00 | H |
| ATOM | 183 | CA  | LYS | 12 | 59.241 | 18.641 | 47.279 | 1.00 | 0.00 | C |
| ATOM | 184 | HA  | LYS | 12 | 58.982 | 19.456 | 47.957 | 1.00 | 0.00 | H |
| ATOM | 185 | CB  | LYS | 12 | 58.497 | 17.389 | 47.747 | 1.00 | 0.00 | C |
| ATOM | 186 | HB2 | LYS | 12 | 58.772 | 17.183 | 48.783 | 1.00 | 0.00 | H |
| ATOM | 187 | HB3 | LYS | 12 | 57.426 | 17.601 | 47.727 | 1.00 | 0.00 | H |
| ATOM | 188 | CG  | LYS | 12 | 58.765 | 16.147 | 46.908 | 1.00 | 0.00 | C |
| ATOM | 189 | HG2 | LYS | 12 | 58.513 | 16.343 | 45.865 | 1.00 | 0.00 | H |
| ATOM | 190 | HG3 | LYS | 12 | 59.821 | 15.882 | 46.972 | 1.00 | 0.00 | H |
| ATOM | 191 | CD  | LYS | 12 | 57.941 | 14.964 | 47.393 | 1.00 | 0.00 | C |
| ATOM | 192 | HD2 | LYS | 12 | 58.163 | 14.779 | 48.445 | 1.00 | 0.00 | H |
| ATOM | 193 | HD3 | LYS | 12 | 56.880 | 15.201 | 47.291 | 1.00 | 0.00 | H |
| ATOM | 194 | CE  | LYS | 12 | 58.251 | 13.708 | 46.593 | 1.00 | 0.00 | C |
| ATOM | 195 | HE2 | LYS | 12 | 58.021 | 13.915 | 45.546 | 1.00 | 0.00 | H |
| ATOM | 196 | HE3 | LYS | 12 | 59.312 | 13.467 | 46.674 | 1.00 | 0.00 | H |
| ATOM | 197 | NZ  | LYS | 12 | 57.434 | 12.547 | 47.040 | 1.00 | 0.00 | N |
| ATOM | 198 | HZ1 | LYS | 12 | 57.375 | 11.865 | 46.298 | 1.00 | 0.00 | H |
| ATOM | 199 | HZ2 | LYS | 12 | 57.858 | 12.126 | 47.853 | 1.00 | 0.00 | H |
| ATOM | 200 | HZ3 | LYS | 12 | 56.504 | 12.861 | 47.274 | 1.00 | 0.00 | H |
| ATOM | 201 | C   | LYS | 12 | 60.721 | 18.397 | 47.398 | 1.00 | 0.00 | C |
| ATOM | 202 | O   | LYS | 12 | 61.318 | 18.087 | 46.352 | 1.00 | 0.00 | O |
| ATOM | 203 | N   | LEU | 13 | 61.299 | 18.649 | 48.603 | 1.00 | 0.00 | N |
| ATOM | 204 | H   | LEU | 13 | 60.718 | 18.975 | 49.362 | 1.00 | 0.00 | H |
| ATOM | 205 | CA  | LEU | 13 | 62.724 | 18.399 | 48.908 | 1.00 | 0.00 | C |
| ATOM | 206 | HA  | LEU | 13 | 63.002 | 17.458 | 48.433 | 1.00 | 0.00 | H |
| ATOM | 207 | CB  | LEU | 13 | 63.578 | 19.521 | 48.304 | 1.00 | 0.00 | C |
| ATOM | 208 | HB2 | LEU | 13 | 63.440 | 19.521 | 47.222 | 1.00 | 0.00 | H |

|      |     |      |     |    |        |        |        |      |      |   |
|------|-----|------|-----|----|--------|--------|--------|------|------|---|
| ATOM | 209 | HB3  | LEU | 13 | 63.192 | 20.471 | 48.669 | 1.00 | 0.00 | H |
| ATOM | 210 | CG   | LEU | 13 | 65.081 | 19.447 | 48.601 | 1.00 | 0.00 | C |
| ATOM | 211 | HG   | LEU | 13 | 65.247 | 19.433 | 49.671 | 1.00 | 0.00 | H |
| ATOM | 212 | CD1  | LEU | 13 | 65.659 | 18.181 | 47.984 | 1.00 | 0.00 | C |
| ATOM | 213 | HD11 | LEU | 13 | 66.739 | 18.165 | 48.135 | 1.00 | 0.00 | H |
| ATOM | 214 | HD12 | LEU | 13 | 65.244 | 17.294 | 48.461 | 1.00 | 0.00 | H |
| ATOM | 215 | HD13 | LEU | 13 | 65.452 | 18.149 | 46.913 | 1.00 | 0.00 | H |
| ATOM | 216 | CD2  | LEU | 13 | 65.769 | 20.687 | 48.051 | 1.00 | 0.00 | C |
| ATOM | 217 | HD21 | LEU | 13 | 66.838 | 20.636 | 48.250 | 1.00 | 0.00 | H |
| ATOM | 218 | HD22 | LEU | 13 | 65.616 | 20.753 | 46.973 | 1.00 | 0.00 | H |
| ATOM | 219 | HD23 | LEU | 13 | 65.369 | 21.585 | 48.520 | 1.00 | 0.00 | H |
| ATOM | 220 | C    | LEU | 13 | 63.019 | 18.288 | 50.438 | 1.00 | 0.00 | C |
| ATOM | 221 | O    | LEU | 13 | 62.753 | 19.255 | 51.160 | 1.00 | 0.00 | O |
| ATOM | 222 | N    | CYS | 14 | 63.668 | 17.230 | 50.850 | 1.00 | 0.00 | N |
| ATOM | 223 | H    | CYS | 14 | 63.927 | 16.525 | 50.175 | 1.00 | 0.00 | H |
| ATOM | 224 | CA   | CYS | 14 | 63.957 | 16.936 | 52.270 | 1.00 | 0.00 | C |
| ATOM | 225 | HA   | CYS | 14 | 63.010 | 16.856 | 52.805 | 1.00 | 0.00 | H |
| ATOM | 226 | CB   | CYS | 14 | 64.719 | 15.619 | 52.421 | 1.00 | 0.00 | C |
| ATOM | 227 | HB2  | CYS | 14 | 64.814 | 15.380 | 53.481 | 1.00 | 0.00 | H |
| ATOM | 228 | HB3  | CYS | 14 | 64.138 | 14.826 | 51.950 | 1.00 | 0.00 | H |
| ATOM | 229 | SG   | CYS | 14 | 66.371 | 15.634 | 51.686 | 1.00 | 0.00 | S |
| ATOM | 230 | HG   | CYS | 14 | 66.527 | 14.307 | 51.635 | 1.00 | 0.00 | H |
| ATOM | 231 | C    | CYS | 14 | 64.759 | 18.009 | 52.906 | 1.00 | 0.00 | C |
| ATOM | 232 | O    | CYS | 14 | 64.927 | 18.017 | 54.148 | 1.00 | 0.00 | O |
| ATOM | 233 | N    | GLN | 15 | 65.539 | 18.819 | 52.159 | 1.00 | 0.00 | N |
| ATOM | 234 | H    | GLN | 15 | 65.509 | 18.705 | 51.158 | 1.00 | 0.00 | H |
| ATOM | 235 | CA   | GLN | 15 | 66.403 | 19.911 | 52.672 | 1.00 | 0.00 | C |
| ATOM | 236 | HA   | GLN | 15 | 66.855 | 19.587 | 53.610 | 1.00 | 0.00 | H |
| ATOM | 237 | CB   | GLN | 15 | 67.529 | 20.194 | 51.674 | 1.00 | 0.00 | C |
| ATOM | 238 | HB2  | GLN | 15 | 67.066 | 20.472 | 50.728 | 1.00 | 0.00 | H |

|      |     |      |     |    |        |        |        |      |      |   |
|------|-----|------|-----|----|--------|--------|--------|------|------|---|
| ATOM | 239 | HB3  | GLN | 15 | 68.118 | 21.042 | 52.026 | 1.00 | 0.00 | H |
| ATOM | 240 | CG   | GLN | 15 | 68.488 | 19.033 | 51.472 | 1.00 | 0.00 | C |
| ATOM | 241 | HG2  | GLN | 15 | 68.990 | 18.813 | 52.415 | 1.00 | 0.00 | H |
| ATOM | 242 | HG3  | GLN | 15 | 67.928 | 18.154 | 51.157 | 1.00 | 0.00 | H |
| ATOM | 243 | CD   | GLN | 15 | 69.526 | 19.319 | 50.404 | 1.00 | 0.00 | C |
| ATOM | 244 | OE1  | GLN | 15 | 70.642 | 18.601 | 50.457 | 1.00 | 0.00 | O |
| ATOM | 245 | NE2  | GLN | 15 | 69.328 | 20.177 | 49.539 | 1.00 | 0.00 | N |
| ATOM | 246 | HE21 | GLN | 15 | 68.488 | 20.734 | 49.554 | 1.00 | 0.00 | H |
| ATOM | 247 | HE22 | GLN | 15 | 70.029 | 20.322 | 48.828 | 1.00 | 0.00 | H |
| ATOM | 248 | C    | GLN | 15 | 65.605 | 21.229 | 52.962 | 1.00 | 0.00 | C |
| ATOM | 249 | O    | GLN | 15 | 66.271 | 22.240 | 53.239 | 1.00 | 0.00 | O |
| ATOM | 250 | N    | THR | 16 | 64.312 | 21.241 | 52.760 | 1.00 | 0.00 | N |
| ATOM | 251 | H    | THR | 16 | 63.825 | 20.406 | 52.468 | 1.00 | 0.00 | H |
| ATOM | 252 | CA   | THR | 16 | 63.555 | 22.469 | 52.961 | 1.00 | 0.00 | C |
| ATOM | 253 | HA   | THR | 16 | 64.226 | 23.328 | 52.941 | 1.00 | 0.00 | H |
| ATOM | 254 | CB   | THR | 16 | 62.581 | 22.669 | 51.784 | 1.00 | 0.00 | C |
| ATOM | 255 | HB   | THR | 16 | 62.021 | 23.594 | 51.926 | 1.00 | 0.00 | H |
| ATOM | 256 | CG2  | THR | 16 | 63.343 | 22.760 | 50.471 | 1.00 | 0.00 | C |
| ATOM | 257 | HG21 | THR | 16 | 62.650 | 22.960 | 49.654 | 1.00 | 0.00 | H |
| ATOM | 258 | HG22 | THR | 16 | 64.069 | 23.570 | 50.524 | 1.00 | 0.00 | H |
| ATOM | 259 | HG23 | THR | 16 | 63.876 | 21.834 | 50.275 | 1.00 | 0.00 | H |
| ATOM | 260 | OG1  | THR | 16 | 61.665 | 21.568 | 51.726 | 1.00 | 0.00 | O |
| ATOM | 261 | HG1  | THR | 16 | 62.156 | 20.774 | 51.488 | 1.00 | 0.00 | H |
| ATOM | 262 | C    | THR | 16 | 62.764 | 22.585 | 54.258 | 1.00 | 0.00 | C |
| ATOM | 263 | O    | THR | 16 | 62.101 | 23.564 | 54.525 | 1.00 | 0.00 | O |
| ATOM | 264 | N    | GLY | 17 | 62.974 | 21.736 | 55.294 | 1.00 | 0.00 | N |
| ATOM | 265 | H    | GLY | 17 | 63.617 | 20.971 | 55.149 | 1.00 | 0.00 | H |
| ATOM | 266 | CA   | GLY | 17 | 62.228 | 21.727 | 56.548 | 1.00 | 0.00 | C |
| ATOM | 267 | HA2  | GLY | 17 | 61.250 | 21.274 | 56.387 | 1.00 | 0.00 | H |
| ATOM | 268 | HA3  | GLY | 17 | 62.775 | 21.135 | 57.282 | 1.00 | 0.00 | H |

|      |     |     |     |    |        |        |        |      |      |   |
|------|-----|-----|-----|----|--------|--------|--------|------|------|---|
| ATOM | 269 | C   | GLY | 17 | 62.049 | 23.166 | 57.097 | 1.00 | 0.00 | C |
| ATOM | 270 | O   | GLY | 17 | 60.959 | 23.719 | 57.191 | 1.00 | 0.00 | O |
| ATOM | 271 | N   | LYS | 18 | 63.102 | 23.982 | 57.252 | 1.00 | 0.00 | N |
| ATOM | 272 | H   | LYS | 18 | 64.000 | 23.577 | 57.031 | 1.00 | 0.00 | H |
| ATOM | 273 | CA  | LYS | 18 | 63.173 | 25.320 | 57.776 | 1.00 | 0.00 | C |
| ATOM | 274 | HA  | LYS | 18 | 62.762 | 25.300 | 58.787 | 1.00 | 0.00 | H |
| ATOM | 275 | CB  | LYS | 18 | 64.645 | 25.726 | 57.875 | 1.00 | 0.00 | C |
| ATOM | 276 | HB2 | LYS | 18 | 65.122 | 25.580 | 56.904 | 1.00 | 0.00 | H |
| ATOM | 277 | HB3 | LYS | 18 | 64.696 | 26.791 | 58.112 | 1.00 | 0.00 | H |
| ATOM | 278 | CG  | LYS | 18 | 65.432 | 24.982 | 58.945 | 1.00 | 0.00 | C |
| ATOM | 279 | HG2 | LYS | 18 | 64.973 | 25.173 | 59.916 | 1.00 | 0.00 | H |
| ATOM | 280 | HG3 | LYS | 18 | 65.405 | 23.910 | 58.745 | 1.00 | 0.00 | H |
| ATOM | 281 | CD  | LYS | 18 | 66.881 | 25.443 | 58.985 | 1.00 | 0.00 | C |
| ATOM | 282 | HD2 | LYS | 18 | 67.346 | 25.245 | 58.018 | 1.00 | 0.00 | H |
| ATOM | 283 | HD3 | LYS | 18 | 66.913 | 26.517 | 59.178 | 1.00 | 0.00 | H |
| ATOM | 284 | CE  | LYS | 18 | 67.663 | 24.720 | 60.072 | 1.00 | 0.00 | C |
| ATOM | 285 | HE2 | LYS | 18 | 67.203 | 24.933 | 61.039 | 1.00 | 0.00 | H |
| ATOM | 286 | HE3 | LYS | 18 | 67.608 | 23.646 | 59.890 | 1.00 | 0.00 | H |
| ATOM | 287 | NZ  | LYS | 18 | 69.091 | 25.139 | 60.103 | 1.00 | 0.00 | N |
| ATOM | 288 | HZ1 | LYS | 18 | 69.148 | 26.133 | 60.275 | 1.00 | 0.00 | H |
| ATOM | 289 | HZ2 | LYS | 18 | 69.581 | 24.644 | 60.836 | 1.00 | 0.00 | H |
| ATOM | 290 | HZ3 | LYS | 18 | 69.525 | 24.937 | 59.213 | 1.00 | 0.00 | H |
| ATOM | 291 | C   | LYS | 18 | 62.427 | 26.399 | 57.038 | 1.00 | 0.00 | C |
| ATOM | 292 | O   | LYS | 18 | 62.096 | 27.475 | 57.567 | 1.00 | 0.00 | O |
| ATOM | 293 | N   | GLN | 19 | 62.142 | 26.087 | 55.795 | 1.00 | 0.00 | N |
| ATOM | 294 | H   | GLN | 19 | 62.445 | 25.178 | 55.477 | 1.00 | 0.00 | H |
| ATOM | 295 | CA  | GLN | 19 | 61.471 | 26.901 | 54.776 | 1.00 | 0.00 | C |
| ATOM | 296 | HA  | GLN | 19 | 61.377 | 27.919 | 55.157 | 1.00 | 0.00 | H |
| ATOM | 297 | CB  | GLN | 19 | 62.347 | 26.943 | 53.521 | 1.00 | 0.00 | C |
| ATOM | 298 | HB2 | GLN | 19 | 62.498 | 25.921 | 53.170 | 1.00 | 0.00 | H |

|      |     |      |     |    |        |        |        |      |      |   |
|------|-----|------|-----|----|--------|--------|--------|------|------|---|
| ATOM | 299 | HB3  | GLN | 19 | 61.833 | 27.484 | 52.727 | 1.00 | 0.00 | H |
| ATOM | 300 | CG   | GLN | 19 | 63.709 | 27.582 | 53.734 | 1.00 | 0.00 | C |
| ATOM | 301 | HG2  | GLN | 19 | 64.240 | 27.089 | 54.549 | 1.00 | 0.00 | H |
| ATOM | 302 | HG3  | GLN | 19 | 64.299 | 27.442 | 52.829 | 1.00 | 0.00 | H |
| ATOM | 303 | CD   | GLN | 19 | 63.613 | 29.072 | 54.001 | 1.00 | 0.00 | C |
| ATOM | 304 | OE1  | GLN | 19 | 64.141 | 29.503 | 55.141 | 1.00 | 0.00 | O |
| ATOM | 305 | NE2  | GLN | 19 | 63.071 | 29.829 | 53.191 | 1.00 | 0.00 | N |
| ATOM | 306 | HE21 | GLN | 19 | 62.746 | 29.463 | 52.309 | 1.00 | 0.00 | H |
| ATOM | 307 | HE22 | GLN | 19 | 63.013 | 30.813 | 53.403 | 1.00 | 0.00 | H |
| ATOM | 308 | C    | GLN | 19 | 60.028 | 26.431 | 54.390 | 1.00 | 0.00 | C |
| ATOM | 309 | O    | GLN | 19 | 59.466 | 27.031 | 53.461 | 1.00 | 0.00 | O |
| ATOM | 310 | N    | GLN | 20 | 59.461 | 25.438 | 55.072 | 1.00 | 0.00 | N |
| ATOM | 311 | H    | GLN | 20 | 59.963 | 24.971 | 55.814 | 1.00 | 0.00 | H |
| ATOM | 312 | CA   | GLN | 20 | 58.146 | 24.881 | 54.612 | 1.00 | 0.00 | C |
| ATOM | 313 | HA   | GLN | 20 | 58.249 | 24.548 | 53.578 | 1.00 | 0.00 | H |
| ATOM | 314 | CB   | GLN | 20 | 57.709 | 23.689 | 55.468 | 1.00 | 0.00 | C |
| ATOM | 315 | HB2  | GLN | 20 | 57.782 | 23.957 | 56.524 | 1.00 | 0.00 | H |
| ATOM | 316 | HB3  | GLN | 20 | 56.666 | 23.485 | 55.240 | 1.00 | 0.00 | H |
| ATOM | 317 | CG   | GLN | 20 | 58.491 | 22.414 | 55.205 | 1.00 | 0.00 | C |
| ATOM | 318 | HG2  | GLN | 20 | 58.450 | 22.191 | 54.138 | 1.00 | 0.00 | H |
| ATOM | 319 | HG3  | GLN | 20 | 59.533 | 22.563 | 55.472 | 1.00 | 0.00 | H |
| ATOM | 320 | CD   | GLN | 20 | 57.941 | 21.228 | 55.975 | 1.00 | 0.00 | C |
| ATOM | 321 | OE1  | GLN | 20 | 57.485 | 20.213 | 55.249 | 1.00 | 0.00 | O |
| ATOM | 322 | NE2  | GLN | 20 | 57.925 | 21.224 | 57.209 | 1.00 | 0.00 | N |
| ATOM | 323 | HE21 | GLN | 20 | 58.328 | 21.995 | 57.725 | 1.00 | 0.00 | H |
| ATOM | 324 | HE22 | GLN | 20 | 57.592 | 20.409 | 57.699 | 1.00 | 0.00 | H |
| ATOM | 325 | C    | GLN | 20 | 57.078 | 25.941 | 54.657 | 1.00 | 0.00 | C |
| ATOM | 326 | O    | GLN | 20 | 57.198 | 26.807 | 55.534 | 1.00 | 0.00 | O |
| ATOM | 327 | N    | SER | 21 | 56.038 | 25.902 | 53.804 | 1.00 | 0.00 | N |
| ATOM | 328 | H    | SER | 21 | 55.951 | 25.193 | 53.091 | 1.00 | 0.00 | H |

|      |     |     |     |    |        |        |        |      |      |   |
|------|-----|-----|-----|----|--------|--------|--------|------|------|---|
| ATOM | 329 | CA  | SER | 21 | 55.013 | 26.999 | 53.899 | 1.00 | 0.00 | C |
| ATOM | 330 | HA  | SER | 21 | 54.951 | 27.350 | 54.926 | 1.00 | 0.00 | H |
| ATOM | 331 | CB  | SER | 21 | 55.534 | 28.122 | 53.051 | 1.00 | 0.00 | C |
| ATOM | 332 | HB2 | SER | 21 | 56.545 | 28.382 | 53.368 | 1.00 | 0.00 | H |
| ATOM | 333 | HB3 | SER | 21 | 55.574 | 27.749 | 52.029 | 1.00 | 0.00 | H |
| ATOM | 334 | OG  | SER | 21 | 54.780 | 29.280 | 53.033 | 1.00 | 0.00 | O |
| ATOM | 335 | HG  | SER | 21 | 55.104 | 29.816 | 52.299 | 1.00 | 0.00 | H |
| ATOM | 336 | C   | SER | 21 | 53.588 | 26.464 | 53.480 | 1.00 | 0.00 | C |
| ATOM | 337 | O   | SER | 21 | 53.592 | 25.522 | 52.591 | 1.00 | 0.00 | O |
| ATOM | 338 | N   | PRO | 22 | 52.447 | 26.925 | 54.001 | 1.00 | 0.00 | N |
| ATOM | 339 | CD  | PRO | 22 | 51.151 | 26.416 | 53.567 | 1.00 | 0.00 | C |
| ATOM | 340 | HD2 | PRO | 22 | 51.115 | 25.328 | 53.611 | 1.00 | 0.00 | H |
| ATOM | 341 | HD3 | PRO | 22 | 50.919 | 26.775 | 52.565 | 1.00 | 0.00 | H |
| ATOM | 342 | CG  | PRO | 22 | 50.206 | 27.013 | 54.575 | 1.00 | 0.00 | C |
| ATOM | 343 | HG2 | PRO | 22 | 50.150 | 26.374 | 55.452 | 1.00 | 0.00 | H |
| ATOM | 344 | HG3 | PRO | 22 | 49.218 | 27.148 | 54.155 | 1.00 | 0.00 | H |
| ATOM | 345 | CB  | PRO | 22 | 50.828 | 28.317 | 54.939 | 1.00 | 0.00 | C |
| ATOM | 346 | HB2 | PRO | 22 | 50.454 | 28.697 | 55.889 | 1.00 | 0.00 | H |
| ATOM | 347 | HB3 | PRO | 22 | 50.618 | 29.044 | 54.155 | 1.00 | 0.00 | H |
| ATOM | 348 | CA  | PRO | 22 | 52.330 | 28.019 | 54.979 | 1.00 | 0.00 | C |
| ATOM | 349 | HA  | PRO | 22 | 52.870 | 28.896 | 54.633 | 1.00 | 0.00 | H |
| ATOM | 350 | C   | PRO | 22 | 52.803 | 27.627 | 56.424 | 1.00 | 0.00 | C |
| ATOM | 351 | O   | PRO | 22 | 52.990 | 26.469 | 56.810 | 1.00 | 0.00 | O |
| ATOM | 352 | N   | VAL | 23 | 53.140 | 28.730 | 57.121 | 1.00 | 0.00 | N |
| ATOM | 353 | H   | VAL | 23 | 53.013 | 29.652 | 56.728 | 1.00 | 0.00 | H |
| ATOM | 354 | CA  | VAL | 23 | 53.531 | 28.600 | 58.495 | 1.00 | 0.00 | C |
| ATOM | 355 | HA  | VAL | 23 | 53.619 | 27.549 | 58.772 | 1.00 | 0.00 | H |
| ATOM | 356 | CB  | VAL | 23 | 54.920 | 29.236 | 58.690 | 1.00 | 0.00 | C |
| ATOM | 357 | HB  | VAL | 23 | 54.866 | 30.293 | 58.463 | 1.00 | 0.00 | H |
| ATOM | 358 | CG1 | VAL | 23 | 55.364 | 29.111 | 60.140 | 1.00 | 0.00 | C |

|      |     |      |     |    |        |        |        |      |      |   |
|------|-----|------|-----|----|--------|--------|--------|------|------|---|
| ATOM | 359 | HG11 | VAL | 23 | 56.358 | 29.538 | 60.255 | 1.00 | 0.00 | H |
| ATOM | 360 | HG12 | VAL | 23 | 54.710 | 29.687 | 60.792 | 1.00 | 0.00 | H |
| ATOM | 361 | HG13 | VAL | 23 | 55.369 | 28.067 | 60.456 | 1.00 | 0.00 | H |
| ATOM | 362 | CG2  | VAL | 23 | 55.926 | 28.579 | 57.759 | 1.00 | 0.00 | C |
| ATOM | 363 | HG21 | VAL | 23 | 56.911 | 29.009 | 57.917 | 1.00 | 0.00 | H |
| ATOM | 364 | HG22 | VAL | 23 | 55.945 | 27.503 | 57.921 | 1.00 | 0.00 | H |
| ATOM | 365 | HG23 | VAL | 23 | 55.664 | 28.763 | 56.719 | 1.00 | 0.00 | H |
| ATOM | 366 | C    | VAL | 23 | 52.538 | 29.240 | 59.468 | 1.00 | 0.00 | C |
| ATOM | 367 | O    | VAL | 23 | 51.986 | 30.310 | 59.192 | 1.00 | 0.00 | O |
| ATOM | 368 | N    | SER | 24 | 52.162 | 28.558 | 60.559 | 1.00 | 0.00 | N |
| ATOM | 369 | H    | SER | 24 | 52.590 | 27.652 | 60.676 | 1.00 | 0.00 | H |
| ATOM | 370 | CA   | SER | 24 | 51.347 | 28.981 | 61.698 | 1.00 | 0.00 | C |
| ATOM | 371 | HA   | SER | 24 | 50.463 | 29.480 | 61.298 | 1.00 | 0.00 | H |
| ATOM | 372 | CB   | SER | 24 | 50.879 | 27.738 | 62.430 | 1.00 | 0.00 | C |
| ATOM | 373 | HB2  | SER | 24 | 50.224 | 27.157 | 61.779 | 1.00 | 0.00 | H |
| ATOM | 374 | HB3  | SER | 24 | 51.742 | 27.128 | 62.701 | 1.00 | 0.00 | H |
| ATOM | 375 | OG   | SER | 24 | 50.184 | 28.076 | 63.599 | 1.00 | 0.00 | O |
| ATOM | 376 | HG   | SER | 24 | 50.710 | 27.800 | 64.358 | 1.00 | 0.00 | H |
| ATOM | 377 | C    | SER | 24 | 52.032 | 29.947 | 62.717 | 1.00 | 0.00 | C |
| ATOM | 378 | O    | SER | 24 | 53.250 | 29.789 | 63.013 | 1.00 | 0.00 | O |
| ATOM | 379 | N    | PHE | 25 | 51.206 | 30.885 | 63.168 | 1.00 | 0.00 | N |
| ATOM | 380 | H    | PHE | 25 | 50.255 | 30.910 | 62.828 | 1.00 | 0.00 | H |
| ATOM | 381 | CA   | PHE | 25 | 51.591 | 31.887 | 64.224 | 1.00 | 0.00 | C |
| ATOM | 382 | HA   | PHE | 25 | 52.662 | 31.831 | 64.420 | 1.00 | 0.00 | H |
| ATOM | 383 | CB   | PHE | 25 | 51.217 | 33.320 | 63.840 | 1.00 | 0.00 | C |
| ATOM | 384 | HB2  | PHE | 25 | 50.161 | 33.366 | 63.580 | 1.00 | 0.00 | H |
| ATOM | 385 | HB3  | PHE | 25 | 51.363 | 33.988 | 64.683 | 1.00 | 0.00 | H |
| ATOM | 386 | CG   | PHE | 25 | 52.035 | 33.877 | 62.709 | 1.00 | 0.00 | C |
| ATOM | 387 | CD1  | PHE | 25 | 51.561 | 33.838 | 61.406 | 1.00 | 0.00 | C |
| ATOM | 388 | HD1  | PHE | 25 | 50.596 | 33.401 | 61.196 | 1.00 | 0.00 | H |



|      |     |     |     |    |        |        |        |      |      |   |
|------|-----|-----|-----|----|--------|--------|--------|------|------|---|
| ATOM | 389 | CE1 | PHE | 25 | 52.313 | 34.350 | 60.366 | 1.00 | 0.00 | C |
| ATOM | 390 | HE1 | PHE | 25 | 51.944 | 34.297 | 59.353 | 1.00 | 0.00 | H |
| ATOM | 391 | CZ  | PHE | 25 | 53.548 | 34.909 | 60.617 | 1.00 | 0.00 | C |
| ATOM | 392 | HZ  | PHE | 25 | 54.110 | 35.350 | 59.812 | 1.00 | 0.00 | H |
| ATOM | 393 | CE2 | PHE | 25 | 54.033 | 34.955 | 61.909 | 1.00 | 0.00 | C |
| ATOM | 394 | HE2 | PHE | 25 | 54.980 | 35.427 | 62.108 | 1.00 | 0.00 | H |
| ATOM | 395 | CD2 | PHE | 25 | 53.280 | 34.441 | 62.946 | 1.00 | 0.00 | C |
| ATOM | 396 | HD2 | PHE | 25 | 53.663 | 34.497 | 63.952 | 1.00 | 0.00 | H |
| ATOM | 397 | C   | PHE | 25 | 50.850 | 31.469 | 65.481 | 1.00 | 0.00 | C |
| ATOM | 398 | O   | PHE | 25 | 50.692 | 32.378 | 66.348 | 1.00 | 0.00 | O |
| ATOM | 399 | N   | SER | 26 | 50.413 | 30.247 | 65.679 | 1.00 | 0.00 | N |
| ATOM | 400 | H   | SER | 26 | 50.572 | 29.549 | 64.967 | 1.00 | 0.00 | H |
| ATOM | 401 | CA  | SER | 26 | 49.737 | 29.799 | 66.953 | 1.00 | 0.00 | C |
| ATOM | 402 | HA  | SER | 26 | 48.839 | 30.404 | 67.084 | 1.00 | 0.00 | H |
| ATOM | 403 | CB  | SER | 26 | 49.308 | 28.351 | 66.815 | 1.00 | 0.00 | C |
| ATOM | 404 | HB2 | SER | 26 | 48.728 | 28.064 | 67.693 | 1.00 | 0.00 | H |
| ATOM | 405 | HB3 | SER | 26 | 48.680 | 28.238 | 65.931 | 1.00 | 0.00 | H |
| ATOM | 406 | OG  | SER | 26 | 50.420 | 27.505 | 66.709 | 1.00 | 0.00 | O |
| ATOM | 407 | HG  | SER | 26 | 51.025 | 27.672 | 67.438 | 1.00 | 0.00 | H |
| ATOM | 408 | C   | SER | 26 | 50.581 | 29.929 | 68.232 | 1.00 | 0.00 | C |
| ATOM | 409 | O   | SER | 26 | 50.002 | 29.996 | 69.357 | 1.00 | 0.00 | O |
| ATOM | 410 | N   | GLU | 27 | 51.900 | 30.044 | 68.081 | 1.00 | 0.00 | N |
| ATOM | 411 | H   | GLU | 27 | 52.269 | 30.073 | 67.143 | 1.00 | 0.00 | H |
| ATOM | 412 | CA  | GLU | 27 | 52.877 | 30.283 | 69.227 | 1.00 | 0.00 | C |
| ATOM | 413 | HA  | GLU | 27 | 52.608 | 29.617 | 70.048 | 1.00 | 0.00 | H |
| ATOM | 414 | CB  | GLU | 27 | 54.298 | 29.937 | 68.779 | 1.00 | 0.00 | C |
| ATOM | 415 | HB2 | GLU | 27 | 54.543 | 30.477 | 67.863 | 1.00 | 0.00 | H |
| ATOM | 416 | HB3 | GLU | 27 | 54.999 | 30.267 | 69.546 | 1.00 | 0.00 | H |
| ATOM | 417 | CG  | GLU | 27 | 54.552 | 28.448 | 68.588 | 1.00 | 0.00 | C |
| ATOM | 418 | HG2 | GLU | 27 | 55.627 | 28.295 | 68.483 | 1.00 | 0.00 | H |

|      |     |      |     |    |        |        |        |      |      |   |
|------|-----|------|-----|----|--------|--------|--------|------|------|---|
| ATOM | 419 | HG3  | GLU | 27 | 54.217 | 27.906 | 69.474 | 1.00 | 0.00 | H |
| ATOM | 420 | CD   | GLU | 27 | 53.871 | 27.891 | 67.369 | 1.00 | 0.00 | C |
| ATOM | 421 | OE1  | GLU | 27 | 53.067 | 28.583 | 66.792 | 1.00 | 0.00 | O |
| ATOM | 422 | OE2  | GLU | 27 | 54.156 | 26.771 | 67.014 | 1.00 | 0.00 | O |
| ATOM | 423 | C    | GLU | 27 | 52.887 | 31.726 | 69.799 | 1.00 | 0.00 | C |
| ATOM | 424 | O    | GLU | 27 | 53.545 | 31.929 | 70.770 | 1.00 | 0.00 | O |
| ATOM | 425 | N    | LEU | 28 | 52.238 | 32.650 | 69.112 | 1.00 | 0.00 | N |
| ATOM | 426 | H    | LEU | 28 | 51.742 | 32.401 | 68.267 | 1.00 | 0.00 | H |
| ATOM | 427 | CA   | LEU | 28 | 52.219 | 34.051 | 69.572 | 1.00 | 0.00 | C |
| ATOM | 428 | HA   | LEU | 28 | 53.233 | 34.351 | 69.841 | 1.00 | 0.00 | H |
| ATOM | 429 | CB   | LEU | 28 | 51.726 | 34.963 | 68.442 | 1.00 | 0.00 | C |
| ATOM | 430 | HB2  | LEU | 28 | 50.971 | 34.435 | 67.863 | 1.00 | 0.00 | H |
| ATOM | 431 | HB3  | LEU | 28 | 51.237 | 35.829 | 68.892 | 1.00 | 0.00 | H |
| ATOM | 432 | CG   | LEU | 28 | 52.812 | 35.508 | 67.505 | 1.00 | 0.00 | C |
| ATOM | 433 | HG   | LEU | 28 | 53.517 | 36.102 | 68.085 | 1.00 | 0.00 | H |
| ATOM | 434 | CD1  | LEU | 28 | 53.554 | 34.347 | 66.858 | 1.00 | 0.00 | C |
| ATOM | 435 | HD11 | LEU | 28 | 54.279 | 34.750 | 66.154 | 1.00 | 0.00 | H |
| ATOM | 436 | HD12 | LEU | 28 | 54.098 | 33.765 | 67.600 | 1.00 | 0.00 | H |
| ATOM | 437 | HD13 | LEU | 28 | 52.869 | 33.694 | 66.327 | 1.00 | 0.00 | H |
| ATOM | 438 | CD2  | LEU | 28 | 52.173 | 36.403 | 66.454 | 1.00 | 0.00 | C |
| ATOM | 439 | HD21 | LEU | 28 | 51.438 | 35.853 | 65.870 | 1.00 | 0.00 | H |
| ATOM | 440 | HD22 | LEU | 28 | 51.671 | 37.238 | 66.941 | 1.00 | 0.00 | H |
| ATOM | 441 | HD23 | LEU | 28 | 52.943 | 36.797 | 65.791 | 1.00 | 0.00 | H |
| ATOM | 442 | C    | LEU | 28 | 51.340 | 34.264 | 70.808 | 1.00 | 0.00 | C |
| ATOM | 443 | O    | LEU | 28 | 51.630 | 35.007 | 71.755 | 1.00 | 0.00 | O |
| ATOM | 444 | N    | GLN | 29 | 50.230 | 33.487 | 70.790 | 1.00 | 0.00 | N |
| ATOM | 445 | H    | GLN | 29 | 50.115 | 32.874 | 69.996 | 1.00 | 0.00 | H |
| ATOM | 446 | CA   | GLN | 29 | 49.174 | 33.451 | 71.759 | 1.00 | 0.00 | C |
| ATOM | 447 | HA   | GLN | 29 | 48.683 | 34.426 | 71.754 | 1.00 | 0.00 | H |
| ATOM | 448 | CB   | GLN | 29 | 48.143 | 32.405 | 71.328 | 1.00 | 0.00 | C |

|      |     |      |     |    |        |        |        |      |      |   |
|------|-----|------|-----|----|--------|--------|--------|------|------|---|
| ATOM | 449 | HB2  | GLN | 29 | 47.679 | 32.764 | 70.412 | 1.00 | 0.00 | H |
| ATOM | 450 | HB3  | GLN | 29 | 48.625 | 31.461 | 71.088 | 1.00 | 0.00 | H |
| ATOM | 451 | CG   | GLN | 29 | 47.050 | 32.149 | 72.352 | 1.00 | 0.00 | C |
| ATOM | 452 | HG2  | GLN | 29 | 47.484 | 31.648 | 73.219 | 1.00 | 0.00 | H |
| ATOM | 453 | HG3  | GLN | 29 | 46.634 | 33.098 | 72.689 | 1.00 | 0.00 | H |
| ATOM | 454 | CD   | GLN | 29 | 45.928 | 31.292 | 71.799 | 1.00 | 0.00 | C |
| ATOM | 455 | OE1  | GLN | 29 | 45.475 | 31.491 | 70.668 | 1.00 | 0.00 | O |
| ATOM | 456 | NE2  | GLN | 29 | 45.472 | 30.331 | 72.594 | 1.00 | 0.00 | N |
| ATOM | 457 | HE21 | GLN | 29 | 44.762 | 29.705 | 72.248 | 1.00 | 0.00 | H |
| ATOM | 458 | HE22 | GLN | 29 | 45.859 | 30.212 | 73.517 | 1.00 | 0.00 | H |
| ATOM | 459 | C    | GLN | 29 | 49.646 | 33.164 | 73.204 | 1.00 | 0.00 | C |
| ATOM | 460 | O    | GLN | 29 | 49.299 | 33.987 | 74.039 | 1.00 | 0.00 | O |
| ATOM | 461 | N    | PRO | 30 | 50.445 | 32.090 | 73.551 | 1.00 | 0.00 | N |
| ATOM | 462 | CD   | PRO | 30 | 50.807 | 30.986 | 72.622 | 1.00 | 0.00 | C |
| ATOM | 463 | HD2  | PRO | 30 | 51.278 | 31.341 | 71.715 | 1.00 | 0.00 | H |
| ATOM | 464 | HD3  | PRO | 30 | 49.926 | 30.386 | 72.400 | 1.00 | 0.00 | H |
| ATOM | 465 | CG   | PRO | 30 | 51.762 | 30.158 | 73.441 | 1.00 | 0.00 | C |
| ATOM | 466 | HG2  | PRO | 30 | 52.786 | 30.470 | 73.229 | 1.00 | 0.00 | H |
| ATOM | 467 | HG3  | PRO | 30 | 51.645 | 29.093 | 73.237 | 1.00 | 0.00 | H |
| ATOM | 468 | CB   | PRO | 30 | 51.421 | 30.489 | 74.854 | 1.00 | 0.00 | C |
| ATOM | 469 | HB2  | PRO | 30 | 52.238 | 30.232 | 75.530 | 1.00 | 0.00 | H |
| ATOM | 470 | HB3  | PRO | 30 | 50.524 | 29.939 | 75.145 | 1.00 | 0.00 | H |
| ATOM | 471 | CA   | PRO | 30 | 51.105 | 31.987 | 74.823 | 1.00 | 0.00 | C |
| ATOM | 472 | HA   | PRO | 30 | 50.389 | 32.205 | 75.617 | 1.00 | 0.00 | H |
| ATOM | 473 | C    | PRO | 30 | 52.348 | 32.770 | 75.107 | 1.00 | 0.00 | C |
| ATOM | 474 | O    | PRO | 30 | 52.934 | 32.576 | 76.199 | 1.00 | 0.00 | O |
| ATOM | 475 | N    | ASN | 31 | 52.697 | 33.687 | 74.247 | 1.00 | 0.00 | N |
| ATOM | 476 | H    | ASN | 31 | 52.125 | 33.824 | 73.426 | 1.00 | 0.00 | H |
| ATOM | 477 | CA   | ASN | 31 | 53.959 | 34.420 | 74.310 | 1.00 | 0.00 | C |
| ATOM | 478 | HA   | ASN | 31 | 53.938 | 35.094 | 73.454 | 1.00 | 0.00 | H |

|      |     |      |     |    |        |        |        |      |      |   |
|------|-----|------|-----|----|--------|--------|--------|------|------|---|
| ATOM | 479 | CB   | ASN | 31 | 53.980 | 35.226 | 75.596 | 1.00 | 0.00 | C |
| ATOM | 480 | HB2  | ASN | 31 | 53.003 | 35.690 | 75.742 | 1.00 | 0.00 | H |
| ATOM | 481 | HB3  | ASN | 31 | 54.196 | 34.596 | 76.458 | 1.00 | 0.00 | H |
| ATOM | 482 | CG   | ASN | 31 | 54.999 | 36.331 | 75.568 | 1.00 | 0.00 | C |
| ATOM | 483 | OD1  | ASN | 31 | 55.550 | 36.646 | 76.713 | 1.00 | 0.00 | O |
| ATOM | 484 | ND2  | ASN | 31 | 55.288 | 36.900 | 74.509 | 1.00 | 0.00 | N |
| ATOM | 485 | HD21 | ASN | 31 | 54.845 | 36.635 | 73.644 | 1.00 | 0.00 | H |
| ATOM | 486 | HD22 | ASN | 31 | 55.995 | 37.617 | 74.529 | 1.00 | 0.00 | H |
| ATOM | 487 | C    | ASN | 31 | 55.266 | 33.555 | 74.192 | 1.00 | 0.00 | C |
| ATOM | 488 | O    | ASN | 31 | 56.145 | 33.554 | 75.044 | 1.00 | 0.00 | O |
| ATOM | 489 | N    | GLU | 32 | 55.393 | 32.711 | 73.166 | 1.00 | 0.00 | N |
| ATOM | 490 | H    | GLU | 32 | 54.625 | 32.684 | 72.509 | 1.00 | 0.00 | H |
| ATOM | 491 | CA   | GLU | 32 | 56.529 | 31.861 | 72.785 | 1.00 | 0.00 | C |
| ATOM | 492 | HA   | GLU | 32 | 57.354 | 32.049 | 73.473 | 1.00 | 0.00 | H |
| ATOM | 493 | CB   | GLU | 32 | 56.144 | 30.386 | 72.915 | 1.00 | 0.00 | C |
| ATOM | 494 | HB2  | GLU | 32 | 55.297 | 30.181 | 72.259 | 1.00 | 0.00 | H |
| ATOM | 495 | HB3  | GLU | 32 | 56.990 | 29.786 | 72.580 | 1.00 | 0.00 | H |
| ATOM | 496 | CG   | GLU | 32 | 55.795 | 29.950 | 74.331 | 1.00 | 0.00 | C |
| ATOM | 497 | HG2  | GLU | 32 | 56.634 | 30.185 | 74.988 | 1.00 | 0.00 | H |
| ATOM | 498 | HG3  | GLU | 32 | 54.922 | 30.506 | 74.677 | 1.00 | 0.00 | H |
| ATOM | 499 | CD   | GLU | 32 | 55.497 | 28.480 | 74.434 | 1.00 | 0.00 | C |
| ATOM | 500 | OE1  | GLU | 32 | 55.583 | 27.804 | 73.436 | 1.00 | 0.00 | O |
| ATOM | 501 | OE2  | GLU | 32 | 55.184 | 28.031 | 75.511 | 1.00 | 0.00 | O |
| ATOM | 502 | C    | GLU | 32 | 57.036 | 32.116 | 71.379 | 1.00 | 0.00 | C |
| ATOM | 503 | O    | GLU | 32 | 56.320 | 32.685 | 70.622 | 1.00 | 0.00 | O |
| ATOM | 504 | N    | VAL | 33 | 58.329 | 31.838 | 71.153 | 1.00 | 0.00 | N |
| ATOM | 505 | H    | VAL | 33 | 58.841 | 31.452 | 71.932 | 1.00 | 0.00 | H |
| ATOM | 506 | CA   | VAL | 33 | 59.070 | 31.841 | 69.859 | 1.00 | 0.00 | C |
| ATOM | 507 | HA   | VAL | 33 | 60.086 | 31.496 | 70.054 | 1.00 | 0.00 | H |
| ATOM | 508 | CB   | VAL | 33 | 58.410 | 30.872 | 68.860 | 1.00 | 0.00 | C |

|      |     |      |     |    |        |        |        |      |      |   |
|------|-----|------|-----|----|--------|--------|--------|------|------|---|
| ATOM | 509 | HB   | VAL | 33 | 57.360 | 31.134 | 68.724 | 1.00 | 0.00 | H |
| ATOM | 510 | CG1  | VAL | 33 | 59.083 | 30.970 | 67.499 | 1.00 | 0.00 | C |
| ATOM | 511 | HG11 | VAL | 33 | 58.683 | 30.199 | 66.840 | 1.00 | 0.00 | H |
| ATOM | 512 | HG12 | VAL | 33 | 58.893 | 31.928 | 67.020 | 1.00 | 0.00 | H |
| ATOM | 513 | HG13 | VAL | 33 | 60.158 | 30.817 | 67.601 | 1.00 | 0.00 | H |
| ATOM | 514 | CG2  | VAL | 33 | 58.479 | 29.450 | 69.394 | 1.00 | 0.00 | C |
| ATOM | 515 | HG21 | VAL | 33 | 58.060 | 28.763 | 68.659 | 1.00 | 0.00 | H |
| ATOM | 516 | HG22 | VAL | 33 | 59.514 | 29.168 | 69.590 | 1.00 | 0.00 | H |
| ATOM | 517 | HG23 | VAL | 33 | 57.896 | 29.353 | 70.309 | 1.00 | 0.00 | H |
| ATOM | 518 | C    | VAL | 33 | 59.163 | 33.163 | 69.194 | 1.00 | 0.00 | C |
| ATOM | 519 | O    | VAL | 33 | 60.230 | 33.623 | 68.791 | 1.00 | 0.00 | O |
| ATOM | 520 | N    | VAL | 34 | 58.096 | 33.922 | 69.046 | 1.00 | 0.00 | N |
| ATOM | 521 | H    | VAL | 34 | 57.212 | 33.589 | 69.395 | 1.00 | 0.00 | H |
| ATOM | 522 | CA   | VAL | 34 | 58.058 | 35.160 | 68.259 | 1.00 | 0.00 | C |
| ATOM | 523 | HA   | VAL | 34 | 58.299 | 34.900 | 67.237 | 1.00 | 0.00 | H |
| ATOM | 524 | CB   | VAL | 34 | 56.647 | 35.776 | 68.302 | 1.00 | 0.00 | C |
| ATOM | 525 | HB   | VAL | 34 | 55.939 | 35.007 | 68.008 | 1.00 | 0.00 | H |
| ATOM | 526 | CG1  | VAL | 34 | 56.311 | 36.240 | 69.711 | 1.00 | 0.00 | C |
| ATOM | 527 | HG11 | VAL | 34 | 55.238 | 36.421 | 69.769 | 1.00 | 0.00 | H |
| ATOM | 528 | HG12 | VAL | 34 | 56.554 | 35.481 | 70.455 | 1.00 | 0.00 | H |
| ATOM | 529 | HG13 | VAL | 34 | 56.807 | 37.179 | 69.956 | 1.00 | 0.00 | H |
| ATOM | 530 | CG2  | VAL | 34 | 56.557 | 36.932 | 67.317 | 1.00 | 0.00 | C |
| ATOM | 531 | HG21 | VAL | 34 | 55.532 | 37.295 | 67.279 | 1.00 | 0.00 | H |
| ATOM | 532 | HG22 | VAL | 34 | 57.213 | 37.751 | 67.610 | 1.00 | 0.00 | H |
| ATOM | 533 | HG23 | VAL | 34 | 56.821 | 36.590 | 66.321 | 1.00 | 0.00 | H |
| ATOM | 534 | C    | VAL | 34 | 59.099 | 36.178 | 68.810 | 1.00 | 0.00 | C |
| ATOM | 535 | O    | VAL | 34 | 59.126 | 36.385 | 69.975 | 1.00 | 0.00 | O |
| ATOM | 536 | N    | HIE | 35 | 59.896 | 36.854 | 67.965 | 1.00 | 0.00 | N |
| ATOM | 537 | H    | HIE | 35 | 59.858 | 36.662 | 66.973 | 1.00 | 0.00 | H |
| ATOM | 538 | CA   | HIE | 35 | 60.834 | 37.850 | 68.450 | 1.00 | 0.00 | C |

|      |     |     |     |    |        |        |        |      |      |   |
|------|-----|-----|-----|----|--------|--------|--------|------|------|---|
| ATOM | 539 | HA  | HIE | 35 | 60.893 | 37.847 | 69.539 | 1.00 | 0.00 | H |
| ATOM | 540 | CB  | HIE | 35 | 62.245 | 37.595 | 67.910 | 1.00 | 0.00 | C |
| ATOM | 541 | HB2 | HIE | 35 | 62.200 | 37.476 | 66.826 | 1.00 | 0.00 | H |
| ATOM | 542 | HB3 | HIE | 35 | 62.876 | 38.457 | 68.128 | 1.00 | 0.00 | H |
| ATOM | 543 | CG  | HIE | 35 | 62.910 | 36.394 | 68.507 | 1.00 | 0.00 | C |
| ATOM | 544 | ND1 | HIE | 35 | 64.133 | 35.927 | 68.071 | 1.00 | 0.00 | N |
| ATOM | 545 | CE1 | HIE | 35 | 64.469 | 34.861 | 68.777 | 1.00 | 0.00 | C |
| ATOM | 546 | HE1 | HIE | 35 | 65.366 | 34.273 | 68.642 | 1.00 | 0.00 | H |
| ATOM | 547 | NE2 | HIE | 35 | 63.510 | 34.620 | 69.651 | 1.00 | 0.00 | N |
| ATOM | 548 | HE2 | HIE | 35 | 63.490 | 33.846 | 70.299 | 1.00 | 0.00 | H |
| ATOM | 549 | CD2 | HIE | 35 | 62.523 | 35.564 | 69.504 | 1.00 | 0.00 | C |
| ATOM | 550 | HD2 | HIE | 35 | 61.610 | 35.620 | 70.076 | 1.00 | 0.00 | H |
| ATOM | 551 | C   | HIE | 35 | 60.348 | 39.224 | 68.028 | 1.00 | 0.00 | C |
| ATOM | 552 | O   | HIE | 35 | 59.618 | 39.383 | 67.061 | 1.00 | 0.00 | O |
| ATOM | 553 | N   | ARG | 36 | 60.921 | 40.282 | 68.636 | 1.00 | 0.00 | N |
| ATOM | 554 | H   | ARG | 36 | 61.587 | 40.131 | 69.380 | 1.00 | 0.00 | H |
| ATOM | 555 | CA  | ARG | 36 | 60.634 | 41.721 | 68.203 | 1.00 | 0.00 | C |
| ATOM | 556 | HA  | ARG | 36 | 59.659 | 41.770 | 67.714 | 1.00 | 0.00 | H |
| ATOM | 557 | CB  | ARG | 36 | 60.623 | 42.689 | 69.376 | 1.00 | 0.00 | C |
| ATOM | 558 | HB2 | ARG | 36 | 59.847 | 42.363 | 70.071 | 1.00 | 0.00 | H |
| ATOM | 559 | HB3 | ARG | 36 | 61.580 | 42.627 | 69.897 | 1.00 | 0.00 | H |
| ATOM | 560 | CG  | ARG | 36 | 60.357 | 44.140 | 69.007 | 1.00 | 0.00 | C |
| ATOM | 561 | HG2 | ARG | 36 | 61.141 | 44.495 | 68.337 | 1.00 | 0.00 | H |
| ATOM | 562 | HG3 | ARG | 36 | 59.398 | 44.207 | 68.490 | 1.00 | 0.00 | H |
| ATOM | 563 | CD  | ARG | 36 | 60.328 | 45.016 | 70.206 | 1.00 | 0.00 | C |
| ATOM | 564 | HD2 | ARG | 36 | 59.502 | 44.708 | 70.850 | 1.00 | 0.00 | H |
| ATOM | 565 | HD3 | ARG | 36 | 61.265 | 44.898 | 70.752 | 1.00 | 0.00 | H |
| ATOM | 566 | NE  | ARG | 36 | 60.164 | 46.416 | 69.851 | 1.00 | 0.00 | N |
| ATOM | 567 | HE  | ARG | 36 | 60.108 | 46.637 | 68.867 | 1.00 | 0.00 | H |
| ATOM | 568 | CZ  | ARG | 36 | 60.079 | 47.426 | 70.739 | 1.00 | 0.00 | C |

|      |     |      |     |    |        |        |        |      |      |   |
|------|-----|------|-----|----|--------|--------|--------|------|------|---|
| ATOM | 569 | NH1  | ARG | 36 | 60.145 | 47.175 | 72.027 | 1.00 | 0.00 | N |
| ATOM | 570 | HH11 | ARG | 36 | 60.289 | 46.228 | 72.343 | 1.00 | 0.00 | H |
| ATOM | 571 | HH12 | ARG | 36 | 60.036 | 47.923 | 72.694 | 1.00 | 0.00 | H |
| ATOM | 572 | NH2  | ARG | 36 | 59.931 | 48.668 | 70.314 | 1.00 | 0.00 | N |
| ATOM | 573 | HH21 | ARG | 36 | 59.849 | 49.425 | 70.975 | 1.00 | 0.00 | H |
| ATOM | 574 | HH22 | ARG | 36 | 59.877 | 48.861 | 69.325 | 1.00 | 0.00 | H |
| ATOM | 575 | C    | ARG | 36 | 61.722 | 42.140 | 67.212 | 1.00 | 0.00 | C |
| ATOM | 576 | O    | ARG | 36 | 62.878 | 42.231 | 67.584 | 1.00 | 0.00 | O |
| ATOM | 577 | N    | LYS | 37 | 61.305 | 42.329 | 65.953 | 1.00 | 0.00 | N |
| ATOM | 578 | H    | LYS | 37 | 60.321 | 42.218 | 65.746 | 1.00 | 0.00 | H |
| ATOM | 579 | CA   | LYS | 37 | 62.207 | 42.669 | 64.796 | 1.00 | 0.00 | C |
| ATOM | 580 | HA   | LYS | 37 | 63.236 | 42.542 | 65.130 | 1.00 | 0.00 | H |
| ATOM | 581 | CB   | LYS | 37 | 61.957 | 41.736 | 63.611 | 1.00 | 0.00 | C |
| ATOM | 582 | HB2  | LYS | 37 | 61.929 | 40.705 | 63.965 | 1.00 | 0.00 | H |
| ATOM | 583 | HB3  | LYS | 37 | 60.982 | 41.980 | 63.192 | 1.00 | 0.00 | H |
| ATOM | 584 | CG   | LYS | 37 | 62.991 | 41.843 | 62.497 | 1.00 | 0.00 | C |
| ATOM | 585 | HG2  | LYS | 37 | 62.628 | 41.265 | 61.645 | 1.00 | 0.00 | H |
| ATOM | 586 | HG3  | LYS | 37 | 63.102 | 42.876 | 62.178 | 1.00 | 0.00 | H |
| ATOM | 587 | CD   | LYS | 37 | 64.332 | 41.270 | 62.931 | 1.00 | 0.00 | C |
| ATOM | 588 | HD2  | LYS | 37 | 64.750 | 41.850 | 63.754 | 1.00 | 0.00 | H |
| ATOM | 589 | HD3  | LYS | 37 | 64.190 | 40.242 | 63.266 | 1.00 | 0.00 | H |
| ATOM | 590 | CE   | LYS | 37 | 65.330 | 41.264 | 61.783 | 1.00 | 0.00 | C |
| ATOM | 591 | HE2  | LYS | 37 | 66.228 | 40.720 | 62.078 | 1.00 | 0.00 | H |
| ATOM | 592 | HE3  | LYS | 37 | 64.871 | 40.747 | 60.939 | 1.00 | 0.00 | H |
| ATOM | 593 | NZ   | LYS | 37 | 65.703 | 42.642 | 61.362 | 1.00 | 0.00 | N |
| ATOM | 594 | HZ1  | LYS | 37 | 66.050 | 42.644 | 60.416 | 1.00 | 0.00 | H |
| ATOM | 595 | HZ2  | LYS | 37 | 64.901 | 43.252 | 61.426 | 1.00 | 0.00 | H |
| ATOM | 596 | HZ3  | LYS | 37 | 66.407 | 43.017 | 61.983 | 1.00 | 0.00 | H |
| ATOM | 597 | C    | LYS | 37 | 62.021 | 44.114 | 64.348 | 1.00 | 0.00 | C |
| ATOM | 598 | O    | LYS | 37 | 60.901 | 44.537 | 64.173 | 1.00 | 0.00 | O |

|      |     |     |     |    |        |        |        |      |      |   |
|------|-----|-----|-----|----|--------|--------|--------|------|------|---|
| ATOM | 599 | N   | ASP | 38 | 63.101 | 44.761 | 64.021 | 1.00 | 0.00 | N |
| ATOM | 600 | H   | ASP | 38 | 63.978 | 44.274 | 64.134 | 1.00 | 0.00 | H |
| ATOM | 601 | CA  | ASP | 38 | 63.225 | 46.142 | 63.527 | 1.00 | 0.00 | C |
| ATOM | 602 | HA  | ASP | 38 | 62.572 | 46.769 | 64.132 | 1.00 | 0.00 | H |
| ATOM | 603 | CB  | ASP | 38 | 64.659 | 46.631 | 63.745 | 1.00 | 0.00 | C |
| ATOM | 604 | HB2 | ASP | 38 | 64.760 | 47.661 | 63.400 | 1.00 | 0.00 | H |
| ATOM | 605 | HB3 | ASP | 38 | 64.864 | 46.627 | 64.816 | 1.00 | 0.00 | H |
| ATOM | 606 | CG  | ASP | 38 | 65.696 | 45.749 | 63.062 | 1.00 | 0.00 | C |
| ATOM | 607 | OD1 | ASP | 38 | 65.494 | 44.559 | 63.011 | 1.00 | 0.00 | O |
| ATOM | 608 | OD2 | ASP | 38 | 66.680 | 46.274 | 62.598 | 1.00 | 0.00 | O |
| ATOM | 609 | C   | ASP | 38 | 62.871 | 46.390 | 62.082 | 1.00 | 0.00 | C |
| ATOM | 610 | O   | ASP | 38 | 63.684 | 46.684 | 61.216 | 1.00 | 0.00 | O |
| ATOM | 611 | N   | MET | 39 | 61.625 | 46.079 | 61.721 | 1.00 | 0.00 | N |
| ATOM | 612 | H   | MET | 39 | 61.000 | 45.764 | 62.450 | 1.00 | 0.00 | H |
| ATOM | 613 | CA  | MET | 39 | 61.028 | 46.261 | 60.452 | 1.00 | 0.00 | C |
| ATOM | 614 | HA  | MET | 39 | 61.691 | 46.840 | 59.808 | 1.00 | 0.00 | H |
| ATOM | 615 | CB  | MET | 39 | 60.761 | 44.914 | 59.783 | 1.00 | 0.00 | C |
| ATOM | 616 | HB2 | MET | 39 | 60.161 | 44.298 | 60.455 | 1.00 | 0.00 | H |
| ATOM | 617 | HB3 | MET | 39 | 60.175 | 45.090 | 58.883 | 1.00 | 0.00 | H |
| ATOM | 618 | CG  | MET | 39 | 62.015 | 44.137 | 59.408 | 1.00 | 0.00 | C |
| ATOM | 619 | HG2 | MET | 39 | 62.626 | 44.738 | 58.735 | 1.00 | 0.00 | H |
| ATOM | 620 | HG3 | MET | 39 | 62.593 | 43.944 | 60.309 | 1.00 | 0.00 | H |
| ATOM | 621 | SD  | MET | 39 | 61.645 | 42.559 | 58.618 | 1.00 | 0.00 | S |
| ATOM | 622 | CE  | MET | 39 | 61.044 | 43.111 | 57.024 | 1.00 | 0.00 | C |
| ATOM | 623 | HE1 | MET | 39 | 60.936 | 42.250 | 56.366 | 1.00 | 0.00 | H |
| ATOM | 624 | HE2 | MET | 39 | 60.077 | 43.597 | 57.135 | 1.00 | 0.00 | H |
| ATOM | 625 | HE3 | MET | 39 | 61.756 | 43.811 | 56.585 | 1.00 | 0.00 | H |
| ATOM | 626 | C   | MET | 39 | 59.766 | 47.041 | 60.619 | 1.00 | 0.00 | C |
| ATOM | 627 | O   | MET | 39 | 59.122 | 46.960 | 61.679 | 1.00 | 0.00 | O |
| ATOM | 628 | N   | GLY | 40 | 59.303 | 47.836 | 59.644 | 1.00 | 0.00 | N |



|      |     |     |     |    |        |        |        |      |      |   |
|------|-----|-----|-----|----|--------|--------|--------|------|------|---|
| ATOM | 629 | H   | GLY | 40 | 59.836 | 47.914 | 58.790 | 1.00 | 0.00 | H |
| ATOM | 630 | CA  | GLY | 40 | 58.037 | 48.572 | 59.689 | 1.00 | 0.00 | C |
| ATOM | 631 | HA2 | GLY | 40 | 57.891 | 48.931 | 60.707 | 1.00 | 0.00 | H |
| ATOM | 632 | HA3 | GLY | 40 | 58.123 | 49.444 | 59.042 | 1.00 | 0.00 | H |
| ATOM | 633 | C   | GLY | 40 | 56.838 | 47.756 | 59.217 | 1.00 | 0.00 | C |
| ATOM | 634 | O   | GLY | 40 | 56.865 | 46.805 | 58.458 | 1.00 | 0.00 | O |
| ATOM | 635 | N   | PRO | 41 | 55.658 | 48.145 | 59.741 | 1.00 | 0.00 | N |
| ATOM | 636 | CD  | PRO | 41 | 55.411 | 49.220 | 60.742 | 1.00 | 0.00 | C |
| ATOM | 637 | HD2 | PRO | 41 | 55.836 | 50.176 | 60.435 | 1.00 | 0.00 | H |
| ATOM | 638 | HD3 | PRO | 41 | 55.797 | 48.900 | 61.705 | 1.00 | 0.00 | H |
| ATOM | 639 | CG  | PRO | 41 | 53.909 | 49.289 | 60.815 | 1.00 | 0.00 | C |
| ATOM | 640 | HG2 | PRO | 41 | 53.547 | 49.992 | 60.064 | 1.00 | 0.00 | H |
| ATOM | 641 | HG3 | PRO | 41 | 53.570 | 49.592 | 61.807 | 1.00 | 0.00 | H |
| ATOM | 642 | CB  | PRO | 41 | 53.457 | 47.910 | 60.476 | 1.00 | 0.00 | C |
| ATOM | 643 | HB2 | PRO | 41 | 52.425 | 47.911 | 60.126 | 1.00 | 0.00 | H |
| ATOM | 644 | HB3 | PRO | 41 | 53.560 | 47.268 | 61.352 | 1.00 | 0.00 | H |
| ATOM | 645 | CA  | PRO | 41 | 54.435 | 47.450 | 59.389 | 1.00 | 0.00 | C |
| ATOM | 646 | HA  | PRO | 41 | 54.559 | 46.367 | 59.443 | 1.00 | 0.00 | H |
| ATOM | 647 | C   | PRO | 41 | 53.965 | 47.856 | 57.986 | 1.00 | 0.00 | C |
| ATOM | 648 | O   | PRO | 41 | 54.496 | 48.791 | 57.364 | 1.00 | 0.00 | O |
| ATOM | 649 | N   | LEU | 42 | 52.909 | 47.192 | 57.469 | 1.00 | 0.00 | N |
| ATOM | 650 | H   | LEU | 42 | 52.530 | 46.454 | 58.045 | 1.00 | 0.00 | H |
| ATOM | 651 | CA  | LEU | 42 | 52.200 | 47.408 | 56.205 | 1.00 | 0.00 | C |
| ATOM | 652 | HA  | LEU | 42 | 52.739 | 48.145 | 55.608 | 1.00 | 0.00 | H |
| ATOM | 653 | CB  | LEU | 42 | 52.101 | 46.098 | 55.413 | 1.00 | 0.00 | C |
| ATOM | 654 | HB2 | LEU | 42 | 51.475 | 45.404 | 55.976 | 1.00 | 0.00 | H |
| ATOM | 655 | HB3 | LEU | 42 | 51.598 | 46.304 | 54.466 | 1.00 | 0.00 | H |
| ATOM | 656 | CG  | LEU | 42 | 53.431 | 45.389 | 55.129 | 1.00 | 0.00 | C |
| ATOM | 657 | HG  | LEU | 42 | 53.933 | 45.156 | 56.068 | 1.00 | 0.00 | H |
| ATOM | 658 | CD1 | LEU | 42 | 53.164 | 44.079 | 54.401 | 1.00 | 0.00 | C |

|      |     |      |     |    |        |        |        |      |      |   |
|------|-----|------|-----|----|--------|--------|--------|------|------|---|
| ATOM | 659 | HD11 | LEU | 42 | 54.103 | 43.547 | 54.255 | 1.00 | 0.00 | H |
| ATOM | 660 | HD12 | LEU | 42 | 52.481 | 43.461 | 54.980 | 1.00 | 0.00 | H |
| ATOM | 661 | HD13 | LEU | 42 | 52.714 | 44.291 | 53.433 | 1.00 | 0.00 | H |
| ATOM | 662 | CD2  | LEU | 42 | 54.326 | 46.301 | 54.303 | 1.00 | 0.00 | C |
| ATOM | 663 | HD21 | LEU | 42 | 55.236 | 45.767 | 54.026 | 1.00 | 0.00 | H |
| ATOM | 664 | HD22 | LEU | 42 | 53.797 | 46.595 | 53.401 | 1.00 | 0.00 | H |
| ATOM | 665 | HD23 | LEU | 42 | 54.613 | 47.185 | 54.872 | 1.00 | 0.00 | H |
| ATOM | 666 | C    | LEU | 42 | 50.795 | 47.965 | 56.486 | 1.00 | 0.00 | C |
| ATOM | 667 | O    | LEU | 42 | 49.770 | 47.331 | 56.314 | 1.00 | 0.00 | O |
| ATOM | 668 | N    | VAL | 43 | 50.749 | 49.284 | 56.828 | 1.00 | 0.00 | N |
| ATOM | 669 | H    | VAL | 43 | 51.616 | 49.796 | 56.912 | 1.00 | 0.00 | H |
| ATOM | 670 | CA   | VAL | 43 | 49.496 | 49.994 | 57.166 | 1.00 | 0.00 | C |
| ATOM | 671 | HA   | VAL | 43 | 48.831 | 49.349 | 57.724 | 1.00 | 0.00 | H |
| ATOM | 672 | CB   | VAL | 43 | 49.787 | 51.229 | 58.038 | 1.00 | 0.00 | C |
| ATOM | 673 | HB   | VAL | 43 | 50.474 | 51.888 | 57.505 | 1.00 | 0.00 | H |
| ATOM | 674 | CG1  | VAL | 43 | 48.505 | 52.000 | 58.315 | 1.00 | 0.00 | C |
| ATOM | 675 | HG11 | VAL | 43 | 48.722 | 52.823 | 58.997 | 1.00 | 0.00 | H |
| ATOM | 676 | HG12 | VAL | 43 | 48.097 | 52.429 | 57.399 | 1.00 | 0.00 | H |
| ATOM | 677 | HG13 | VAL | 43 | 47.763 | 51.349 | 58.779 | 1.00 | 0.00 | H |
| ATOM | 678 | CG2  | VAL | 43 | 50.449 | 50.800 | 59.339 | 1.00 | 0.00 | C |
| ATOM | 679 | HG21 | VAL | 43 | 49.804 | 50.107 | 59.880 | 1.00 | 0.00 | H |
| ATOM | 680 | HG22 | VAL | 43 | 51.408 | 50.322 | 59.142 | 1.00 | 0.00 | H |
| ATOM | 681 | HG23 | VAL | 43 | 50.631 | 51.675 | 59.963 | 1.00 | 0.00 | H |
| ATOM | 682 | C    | VAL | 43 | 48.778 | 50.429 | 55.873 | 1.00 | 0.00 | C |
| ATOM | 683 | O    | VAL | 43 | 49.404 | 50.876 | 54.892 | 1.00 | 0.00 | O |
| ATOM | 684 | N    | PHE | 44 | 47.515 | 50.051 | 55.716 | 1.00 | 0.00 | N |
| ATOM | 685 | H    | PHE | 44 | 47.041 | 49.583 | 56.475 | 1.00 | 0.00 | H |
| ATOM | 686 | CA   | PHE | 44 | 46.744 | 50.353 | 54.535 | 1.00 | 0.00 | C |
| ATOM | 687 | HA   | PHE | 44 | 47.420 | 50.457 | 53.692 | 1.00 | 0.00 | H |
| ATOM | 688 | CB   | PHE | 44 | 45.913 | 49.106 | 54.230 | 1.00 | 0.00 | C |

|      |     |     |     |    |        |        |        |      |      |   |
|------|-----|-----|-----|----|--------|--------|--------|------|------|---|
| ATOM | 689 | HB2 | PHE | 44 | 45.380 | 48.783 | 55.127 | 1.00 | 0.00 | H |
| ATOM | 690 | HB3 | PHE | 44 | 45.157 | 49.362 | 53.487 | 1.00 | 0.00 | H |
| ATOM | 691 | CG  | PHE | 44 | 46.716 | 47.963 | 53.677 | 1.00 | 0.00 | C |
| ATOM | 692 | CD1 | PHE | 44 | 47.341 | 47.061 | 54.526 | 1.00 | 0.00 | C |
| ATOM | 693 | HD1 | PHE | 44 | 47.257 | 47.183 | 55.595 | 1.00 | 0.00 | H |
| ATOM | 694 | CE1 | PHE | 44 | 48.081 | 46.010 | 54.018 | 1.00 | 0.00 | C |
| ATOM | 695 | HE1 | PHE | 44 | 48.553 | 45.308 | 54.689 | 1.00 | 0.00 | H |
| ATOM | 696 | CZ  | PHE | 44 | 48.203 | 45.847 | 52.655 | 1.00 | 0.00 | C |
| ATOM | 697 | HZ  | PHE | 44 | 48.809 | 45.055 | 52.256 | 1.00 | 0.00 | H |
| ATOM | 698 | CE2 | PHE | 44 | 47.586 | 46.736 | 51.798 | 1.00 | 0.00 | C |
| ATOM | 699 | HE2 | PHE | 44 | 47.685 | 46.617 | 50.729 | 1.00 | 0.00 | H |
| ATOM | 700 | CD2 | PHE | 44 | 46.849 | 47.787 | 52.308 | 1.00 | 0.00 | C |
| ATOM | 701 | HD2 | PHE | 44 | 46.369 | 48.474 | 51.634 | 1.00 | 0.00 | H |
| ATOM | 702 | C   | PHE | 44 | 45.798 | 51.583 | 54.459 | 1.00 | 0.00 | C |
| ATOM | 703 | O   | PHE | 44 | 44.692 | 51.610 | 55.053 | 1.00 | 0.00 | O |
| ATOM | 704 | N   | SER | 45 | 46.179 | 52.591 | 53.700 | 1.00 | 0.00 | N |
| ATOM | 705 | H   | SER | 45 | 47.067 | 52.491 | 53.229 | 1.00 | 0.00 | H |
| ATOM | 706 | CA  | SER | 45 | 45.510 | 53.879 | 53.485 | 1.00 | 0.00 | C |
| ATOM | 707 | HA  | SER | 45 | 44.441 | 53.712 | 53.364 | 1.00 | 0.00 | H |
| ATOM | 708 | CB  | SER | 45 | 45.727 | 54.808 | 54.664 | 1.00 | 0.00 | C |
| ATOM | 709 | HB2 | SER | 45 | 45.318 | 54.346 | 55.563 | 1.00 | 0.00 | H |
| ATOM | 710 | HB3 | SER | 45 | 46.795 | 54.977 | 54.808 | 1.00 | 0.00 | H |
| ATOM | 711 | OG  | SER | 45 | 45.089 | 56.039 | 54.458 | 1.00 | 0.00 | O |
| ATOM | 712 | HG  | SER | 45 | 45.544 | 56.511 | 53.756 | 1.00 | 0.00 | H |
| ATOM | 713 | C   | SER | 45 | 46.060 | 54.505 | 52.210 | 1.00 | 0.00 | C |
| ATOM | 714 | O   | SER | 45 | 47.258 | 54.432 | 51.989 | 1.00 | 0.00 | O |
| ATOM | 715 | N   | ARG | 46 | 45.333 | 55.274 | 51.427 | 1.00 | 0.00 | N |
| ATOM | 716 | H   | ARG | 46 | 44.359 | 55.428 | 51.647 | 1.00 | 0.00 | H |
| ATOM | 717 | CA  | ARG | 46 | 45.862 | 55.902 | 50.187 | 1.00 | 0.00 | C |
| ATOM | 718 | HA  | ARG | 46 | 46.949 | 55.976 | 50.218 | 1.00 | 0.00 | H |

|      |     |      |     |    |        |        |        |      |      |   |
|------|-----|------|-----|----|--------|--------|--------|------|------|---|
| ATOM | 719 | CB   | ARG | 46 | 45.482 | 55.102 | 48.950 | 1.00 | 0.00 | C |
| ATOM | 720 | HB2  | ARG | 46 | 46.046 | 55.474 | 48.100 | 1.00 | 0.00 | H |
| ATOM | 721 | HB3  | ARG | 46 | 45.784 | 54.065 | 49.105 | 1.00 | 0.00 | H |
| ATOM | 722 | CG   | ARG | 46 | 44.005 | 55.139 | 48.593 | 1.00 | 0.00 | C |
| ATOM | 723 | HG2  | ARG | 46 | 43.392 | 54.797 | 49.423 | 1.00 | 0.00 | H |
| ATOM | 724 | HG3  | ARG | 46 | 43.772 | 56.169 | 48.369 | 1.00 | 0.00 | H |
| ATOM | 725 | CD   | ARG | 46 | 43.715 | 54.350 | 47.368 | 1.00 | 0.00 | C |
| ATOM | 726 | HD2  | ARG | 46 | 44.410 | 54.651 | 46.582 | 1.00 | 0.00 | H |
| ATOM | 727 | HD3  | ARG | 46 | 43.865 | 53.291 | 47.583 | 1.00 | 0.00 | H |
| ATOM | 728 | NE   | ARG | 46 | 42.357 | 54.562 | 46.894 | 1.00 | 0.00 | N |
| ATOM | 729 | HE   | ARG | 46 | 41.770 | 55.176 | 47.440 | 1.00 | 0.00 | H |
| ATOM | 730 | CZ   | ARG | 46 | 41.844 | 54.016 | 45.775 | 1.00 | 0.00 | C |
| ATOM | 731 | NH1  | ARG | 46 | 42.586 | 53.230 | 45.026 | 1.00 | 0.00 | N |
| ATOM | 732 | HH11 | ARG | 46 | 43.546 | 53.049 | 45.281 | 1.00 | 0.00 | H |
| ATOM | 733 | HH12 | ARG | 46 | 42.195 | 52.822 | 44.192 | 1.00 | 0.00 | H |
| ATOM | 734 | NH2  | ARG | 46 | 40.594 | 54.272 | 45.428 | 1.00 | 0.00 | N |
| ATOM | 735 | HH21 | ARG | 46 | 40.194 | 53.839 | 44.607 | 1.00 | 0.00 | H |
| ATOM | 736 | HH22 | ARG | 46 | 40.037 | 54.909 | 45.980 | 1.00 | 0.00 | H |
| ATOM | 737 | C    | ARG | 46 | 45.298 | 57.329 | 50.076 | 1.00 | 0.00 | C |
| ATOM | 738 | O    | ARG | 46 | 44.210 | 57.573 | 50.519 | 1.00 | 0.00 | O |
| ATOM | 739 | N    | ASP | 47 | 45.939 | 58.169 | 49.267 | 1.00 | 0.00 | N |
| ATOM | 740 | H    | ASP | 47 | 46.803 | 57.884 | 48.822 | 1.00 | 0.00 | H |
| ATOM | 741 | CA   | ASP | 47 | 45.462 | 59.532 | 49.024 | 1.00 | 0.00 | C |
| ATOM | 742 | HA   | ASP | 47 | 45.367 | 60.044 | 49.982 | 1.00 | 0.00 | H |
| ATOM | 743 | CB   | ASP | 47 | 46.497 | 60.271 | 48.173 | 1.00 | 0.00 | C |
| ATOM | 744 | HB2  | ASP | 47 | 46.768 | 59.665 | 47.307 | 1.00 | 0.00 | H |
| ATOM | 745 | HB3  | ASP | 47 | 46.048 | 61.195 | 47.807 | 1.00 | 0.00 | H |
| ATOM | 746 | CG   | ASP | 47 | 47.747 | 60.650 | 48.957 | 1.00 | 0.00 | C |
| ATOM | 747 | OD1  | ASP | 47 | 47.722 | 60.551 | 50.161 | 1.00 | 0.00 | O |
| ATOM | 748 | OD2  | ASP | 47 | 48.714 | 61.033 | 48.344 | 1.00 | 0.00 | O |

|      |     |     |     |    |        |        |        |      |      |   |
|------|-----|-----|-----|----|--------|--------|--------|------|------|---|
| ATOM | 749 | C   | ASP | 47 | 44.039 | 59.613 | 48.328 | 1.00 | 0.00 | C |
| ATOM | 750 | O   | ASP | 47 | 43.191 | 60.458 | 48.652 | 1.00 | 0.00 | O |
| ATOM | 751 | N   | CYS | 48 | 43.737 | 58.639 | 47.423 | 1.00 | 0.00 | N |
| ATOM | 752 | H   | CYS | 48 | 44.426 | 57.936 | 47.197 | 1.00 | 0.00 | H |
| ATOM | 753 | CA  | CYS | 48 | 42.460 | 58.615 | 46.745 | 1.00 | 0.00 | C |
| ATOM | 754 | HA  | CYS | 48 | 42.189 | 59.638 | 46.479 | 1.00 | 0.00 | H |
| ATOM | 755 | CB  | CYS | 48 | 42.585 | 57.826 | 45.441 | 1.00 | 0.00 | C |
| ATOM | 756 | HB2 | CYS | 48 | 43.313 | 58.327 | 44.802 | 1.00 | 0.00 | H |
| ATOM | 757 | HB3 | CYS | 48 | 42.967 | 56.830 | 45.661 | 1.00 | 0.00 | H |
| ATOM | 758 | SG  | CYS | 48 | 41.033 | 57.661 | 44.526 | 1.00 | 0.00 | S |
| ATOM | 759 | HG  | CYS | 48 | 41.535 | 56.930 | 43.521 | 1.00 | 0.00 | H |
| ATOM | 760 | C   | CYS | 48 | 41.333 | 58.019 | 47.565 | 1.00 | 0.00 | C |
| ATOM | 761 | O   | CYS | 48 | 41.586 | 56.940 | 48.061 | 1.00 | 0.00 | O |
| ATOM | 762 | N   | LYS | 49 | 40.211 | 58.728 | 47.762 | 1.00 | 0.00 | N |
| ATOM | 763 | H   | LYS | 49 | 40.104 | 59.638 | 47.338 | 1.00 | 0.00 | H |
| ATOM | 764 | CA  | LYS | 49 | 39.131 | 58.189 | 48.585 | 1.00 | 0.00 | C |
| ATOM | 765 | HA  | LYS | 49 | 39.446 | 58.241 | 49.628 | 1.00 | 0.00 | H |
| ATOM | 766 | CB  | LYS | 49 | 37.858 | 59.019 | 48.414 | 1.00 | 0.00 | C |
| ATOM | 767 | HB2 | LYS | 49 | 38.111 | 60.064 | 48.599 | 1.00 | 0.00 | H |
| ATOM | 768 | HB3 | LYS | 49 | 37.513 | 58.934 | 47.382 | 1.00 | 0.00 | H |
| ATOM | 769 | CG  | LYS | 49 | 36.722 | 58.629 | 49.351 | 1.00 | 0.00 | C |
| ATOM | 770 | HG2 | LYS | 49 | 36.396 | 57.612 | 49.133 | 1.00 | 0.00 | H |
| ATOM | 771 | HG3 | LYS | 49 | 37.083 | 58.671 | 50.380 | 1.00 | 0.00 | H |
| ATOM | 772 | CD  | LYS | 49 | 35.535 | 59.569 | 49.202 | 1.00 | 0.00 | C |
| ATOM | 773 | HD2 | LYS | 49 | 35.869 | 60.598 | 49.348 | 1.00 | 0.00 | H |
| ATOM | 774 | HD3 | LYS | 49 | 35.125 | 59.470 | 48.195 | 1.00 | 0.00 | H |
| ATOM | 775 | CE  | LYS | 49 | 34.449 | 59.257 | 50.221 | 1.00 | 0.00 | C |
| ATOM | 776 | HE2 | LYS | 49 | 34.112 | 58.227 | 50.097 | 1.00 | 0.00 | H |
| ATOM | 777 | HE3 | LYS | 49 | 34.881 | 59.365 | 51.217 | 1.00 | 0.00 | H |
| ATOM | 778 | NZ  | LYS | 49 | 33.290 | 60.182 | 50.100 | 1.00 | 0.00 | N |

|      |     |     |     |    |        |        |        |      |      |   |
|------|-----|-----|-----|----|--------|--------|--------|------|------|---|
| ATOM | 779 | HZ1 | LYS | 49 | 33.619 | 61.120 | 49.929 | 1.00 | 0.00 | H |
| ATOM | 780 | HZ2 | LYS | 49 | 32.702 | 59.889 | 49.333 | 1.00 | 0.00 | H |
| ATOM | 781 | HZ3 | LYS | 49 | 32.756 | 60.172 | 50.957 | 1.00 | 0.00 | H |
| ATOM | 782 | C   | LYS | 49 | 38.877 | 56.709 | 48.208 | 1.00 | 0.00 | C |
| ATOM | 783 | O   | LYS | 49 | 38.830 | 56.334 | 47.031 | 1.00 | 0.00 | O |
| ATOM | 784 | N   | PHE | 50 | 38.707 | 55.830 | 49.241 | 1.00 | 0.00 | N |
| ATOM | 785 | H   | PHE | 50 | 38.794 | 56.169 | 50.188 | 1.00 | 0.00 | H |
| ATOM | 786 | CA  | PHE | 50 | 38.405 | 54.413 | 49.060 | 1.00 | 0.00 | C |
| ATOM | 787 | HA  | PHE | 50 | 39.199 | 53.941 | 48.511 | 1.00 | 0.00 | H |
| ATOM | 788 | CB  | PHE | 50 | 38.160 | 53.759 | 50.421 | 1.00 | 0.00 | C |
| ATOM | 789 | HB2 | PHE | 50 | 37.528 | 54.402 | 51.037 | 1.00 | 0.00 | H |
| ATOM | 790 | HB3 | PHE | 50 | 37.631 | 52.819 | 50.261 | 1.00 | 0.00 | H |
| ATOM | 791 | CG  | PHE | 50 | 39.420 | 53.415 | 51.164 | 1.00 | 0.00 | C |
| ATOM | 792 | CD1 | PHE | 50 | 40.648 | 53.432 | 50.520 | 1.00 | 0.00 | C |
| ATOM | 793 | HD1 | PHE | 50 | 40.806 | 53.706 | 49.511 | 1.00 | 0.00 | H |
| ATOM | 794 | CE1 | PHE | 50 | 41.808 | 53.115 | 51.202 | 1.00 | 0.00 | C |
| ATOM | 795 | HE1 | PHE | 50 | 42.759 | 53.122 | 50.695 | 1.00 | 0.00 | H |
| ATOM | 796 | CZ  | PHE | 50 | 41.752 | 52.778 | 52.538 | 1.00 | 0.00 | C |
| ATOM | 797 | HZ  | PHE | 50 | 42.649 | 52.501 | 53.071 | 1.00 | 0.00 | H |
| ATOM | 798 | CE2 | PHE | 50 | 40.537 | 52.757 | 53.191 | 1.00 | 0.00 | C |
| ATOM | 799 | HE2 | PHE | 50 | 40.496 | 52.499 | 54.240 | 1.00 | 0.00 | H |
| ATOM | 800 | CD2 | PHE | 50 | 39.379 | 53.073 | 52.507 | 1.00 | 0.00 | C |
| ATOM | 801 | HD2 | PHE | 50 | 38.435 | 53.049 | 53.031 | 1.00 | 0.00 | H |
| ATOM | 802 | C   | PHE | 50 | 37.224 | 54.125 | 48.177 | 1.00 | 0.00 | C |
| ATOM | 803 | O   | PHE | 50 | 37.277 | 53.183 | 47.315 | 1.00 | 0.00 | O |
| ATOM | 804 | N   | ALA | 51 | 36.163 | 54.903 | 48.386 | 1.00 | 0.00 | N |
| ATOM | 805 | H   | ALA | 51 | 36.255 | 55.598 | 49.111 | 1.00 | 0.00 | H |
| ATOM | 806 | CA  | ALA | 51 | 34.891 | 54.941 | 47.654 | 1.00 | 0.00 | C |
| ATOM | 807 | HA  | ALA | 51 | 34.707 | 53.931 | 47.283 | 1.00 | 0.00 | H |
| ATOM | 808 | CB  | ALA | 51 | 33.865 | 55.173 | 48.744 | 1.00 | 0.00 | C |

|      |     |     |     |    |        |        |        |      |      |   |
|------|-----|-----|-----|----|--------|--------|--------|------|------|---|
| ATOM | 809 | HB1 | ALA | 51 | 32.865 | 55.148 | 48.309 | 1.00 | 0.00 | H |
| ATOM | 810 | HB2 | ALA | 51 | 33.934 | 54.391 | 49.502 | 1.00 | 0.00 | H |
| ATOM | 811 | HB3 | ALA | 51 | 34.023 | 56.146 | 49.210 | 1.00 | 0.00 | H |
| ATOM | 812 | C   | ALA | 51 | 34.886 | 55.835 | 46.434 | 1.00 | 0.00 | C |
| ATOM | 813 | O   | ALA | 51 | 34.383 | 56.938 | 46.510 | 1.00 | 0.00 | O |
| ATOM | 814 | N   | ALA | 52 | 35.517 | 55.390 | 45.344 | 1.00 | 0.00 | N |
| ATOM | 815 | H   | ALA | 52 | 35.910 | 54.459 | 45.347 | 1.00 | 0.00 | H |
| ATOM | 816 | CA  | ALA | 52 | 35.772 | 56.217 | 44.155 | 1.00 | 0.00 | C |
| ATOM | 817 | HA  | ALA | 52 | 35.001 | 56.988 | 44.116 | 1.00 | 0.00 | H |
| ATOM | 818 | CB  | ALA | 52 | 37.171 | 56.976 | 44.263 | 1.00 | 0.00 | C |
| ATOM | 819 | HB1 | ALA | 52 | 37.304 | 57.640 | 43.408 | 1.00 | 0.00 | H |
| ATOM | 820 | HB2 | ALA | 52 | 37.197 | 57.571 | 45.176 | 1.00 | 0.00 | H |
| ATOM | 821 | HB3 | ALA | 52 | 37.982 | 56.247 | 44.281 | 1.00 | 0.00 | H |
| ATOM | 822 | C   | ALA | 52 | 35.678 | 55.474 | 42.855 | 1.00 | 0.00 | C |
| ATOM | 823 | O   | ALA | 52 | 35.882 | 54.260 | 42.791 | 1.00 | 0.00 | O |
| ATOM | 824 | N   | GLU | 53 | 35.545 | 56.251 | 41.746 | 1.00 | 0.00 | N |
| ATOM | 825 | H   | GLU | 53 | 35.368 | 57.229 | 41.844 | 1.00 | 0.00 | H |
| ATOM | 826 | CA  | GLU | 53 | 35.503 | 55.564 | 40.403 | 1.00 | 0.00 | C |
| ATOM | 827 | HA  | GLU | 53 | 34.784 | 54.744 | 40.445 | 1.00 | 0.00 | H |
| ATOM | 828 | CB  | GLU | 53 | 35.070 | 56.533 | 39.301 | 1.00 | 0.00 | C |
| ATOM | 829 | HB2 | GLU | 53 | 34.980 | 55.955 | 38.380 | 1.00 | 0.00 | H |
| ATOM | 830 | HB3 | GLU | 53 | 34.081 | 56.935 | 39.522 | 1.00 | 0.00 | H |
| ATOM | 831 | CG  | GLU | 53 | 36.052 | 57.667 | 39.039 | 1.00 | 0.00 | C |
| ATOM | 832 | HG2 | GLU | 53 | 37.083 | 57.319 | 39.054 | 1.00 | 0.00 | H |
| ATOM | 833 | HG3 | GLU | 53 | 35.857 | 58.039 | 38.032 | 1.00 | 0.00 | H |
| ATOM | 834 | CD  | GLU | 53 | 35.881 | 58.819 | 39.989 | 1.00 | 0.00 | C |
| ATOM | 835 | OE1 | GLU | 53 | 35.255 | 58.638 | 41.006 | 1.00 | 0.00 | O |
| ATOM | 836 | OE2 | GLU | 53 | 36.377 | 59.882 | 39.698 | 1.00 | 0.00 | O |
| ATOM | 837 | C   | GLU | 53 | 36.930 | 54.976 | 40.088 | 1.00 | 0.00 | C |
| ATOM | 838 | O   | GLU | 53 | 36.930 | 54.058 | 39.279 | 1.00 | 0.00 | O |

|      |     |      |     |    |        |        |        |      |      |   |
|------|-----|------|-----|----|--------|--------|--------|------|------|---|
| ATOM | 839 | N    | LYS | 54 | 38.002 | 55.315 | 40.840 | 1.00 | 0.00 | N |
| ATOM | 840 | H    | LYS | 54 | 37.865 | 56.004 | 41.566 | 1.00 | 0.00 | H |
| ATOM | 841 | CA   | LYS | 54 | 39.312 | 54.851 | 40.642 | 1.00 | 0.00 | C |
| ATOM | 842 | HA   | LYS | 54 | 39.442 | 54.609 | 39.591 | 1.00 | 0.00 | H |
| ATOM | 843 | CB   | LYS | 54 | 40.292 | 55.983 | 40.952 | 1.00 | 0.00 | C |
| ATOM | 844 | HB2  | LYS | 54 | 40.123 | 56.326 | 41.974 | 1.00 | 0.00 | H |
| ATOM | 845 | HB3  | LYS | 54 | 41.304 | 55.579 | 40.897 | 1.00 | 0.00 | H |
| ATOM | 846 | CG   | LYS | 54 | 40.199 | 57.172 | 40.005 | 1.00 | 0.00 | C |
| ATOM | 847 | HG2  | LYS | 54 | 40.384 | 56.835 | 38.984 | 1.00 | 0.00 | H |
| ATOM | 848 | HG3  | LYS | 54 | 39.199 | 57.603 | 40.059 | 1.00 | 0.00 | H |
| ATOM | 849 | CD   | LYS | 54 | 41.208 | 58.251 | 40.371 | 1.00 | 0.00 | C |
| ATOM | 850 | HD2  | LYS | 54 | 41.028 | 58.576 | 41.397 | 1.00 | 0.00 | H |
| ATOM | 851 | HD3  | LYS | 54 | 42.216 | 57.839 | 40.303 | 1.00 | 0.00 | H |
| ATOM | 852 | CE   | LYS | 54 | 41.095 | 59.453 | 39.446 | 1.00 | 0.00 | C |
| ATOM | 853 | HE2  | LYS | 54 | 41.273 | 59.131 | 38.419 | 1.00 | 0.00 | H |
| ATOM | 854 | HE3  | LYS | 54 | 40.080 | 59.850 | 39.512 | 1.00 | 0.00 | H |
| ATOM | 855 | NZ   | LYS | 54 | 42.063 | 60.525 | 39.804 | 1.00 | 0.00 | N |
| ATOM | 856 | HZ1  | LYS | 54 | 42.578 | 60.259 | 40.632 | 1.00 | 0.00 | H |
| ATOM | 857 | HZ2  | LYS | 54 | 42.709 | 60.671 | 39.041 | 1.00 | 0.00 | H |
| ATOM | 858 | HZ3  | LYS | 54 | 41.563 | 61.384 | 39.988 | 1.00 | 0.00 | H |
| ATOM | 859 | C    | LYS | 54 | 39.589 | 53.570 | 41.529 | 1.00 | 0.00 | C |
| ATOM | 860 | O    | LYS | 54 | 39.680 | 53.655 | 42.723 | 1.00 | 0.00 | O |
| ATOM | 861 | N    | THR | 55 | 39.668 | 52.345 | 40.982 | 1.00 | 0.00 | N |
| ATOM | 862 | H    | THR | 55 | 39.828 | 51.587 | 41.629 | 1.00 | 0.00 | H |
| ATOM | 863 | CA   | THR | 55 | 39.484 | 51.934 | 39.624 | 1.00 | 0.00 | C |
| ATOM | 864 | HA   | THR | 55 | 39.032 | 52.733 | 39.044 | 1.00 | 0.00 | H |
| ATOM | 865 | CB   | THR | 55 | 40.842 | 51.609 | 38.975 | 1.00 | 0.00 | C |
| ATOM | 866 | HB   | THR | 55 | 40.699 | 51.429 | 37.909 | 1.00 | 0.00 | H |
| ATOM | 867 | CG2  | THR | 55 | 41.809 | 52.769 | 39.153 | 1.00 | 0.00 | C |
| ATOM | 868 | HG21 | THR | 55 | 42.715 | 52.569 | 38.582 | 1.00 | 0.00 | H |



|      |     |      |     |    |        |        |        |      |      |   |
|------|-----|------|-----|----|--------|--------|--------|------|------|---|
| ATOM | 869 | HG22 | THR | 55 | 41.367 | 53.688 | 38.772 | 1.00 | 0.00 | H |
| ATOM | 870 | HG23 | THR | 55 | 42.087 | 52.893 | 40.199 | 1.00 | 0.00 | H |
| ATOM | 871 | OG1  | THR | 55 | 41.395 | 50.433 | 39.580 | 1.00 | 0.00 | O |
| ATOM | 872 | HG1  | THR | 55 | 40.832 | 49.685 | 39.361 | 1.00 | 0.00 | H |
| ATOM | 873 | C    | THR | 55 | 38.565 | 50.743 | 39.485 | 1.00 | 0.00 | C |
| ATOM | 874 | O    | THR | 55 | 38.000 | 50.227 | 40.476 | 1.00 | 0.00 | O |
| ATOM | 875 | N    | SER | 56 | 38.199 | 50.364 | 38.236 | 1.00 | 0.00 | N |
| ATOM | 876 | H    | SER | 56 | 38.563 | 50.909 | 37.469 | 1.00 | 0.00 | H |
| ATOM | 877 | CA   | SER | 56 | 37.524 | 49.102 | 37.840 | 1.00 | 0.00 | C |
| ATOM | 878 | HA   | SER | 56 | 36.647 | 48.965 | 38.475 | 1.00 | 0.00 | H |
| ATOM | 879 | CB   | SER | 56 | 37.059 | 49.176 | 36.398 | 1.00 | 0.00 | C |
| ATOM | 880 | HB2  | SER | 56 | 36.451 | 48.301 | 36.166 | 1.00 | 0.00 | H |
| ATOM | 881 | HB3  | SER | 56 | 36.448 | 50.069 | 36.261 | 1.00 | 0.00 | H |
| ATOM | 882 | OG   | SER | 56 | 38.150 | 49.221 | 35.520 | 1.00 | 0.00 | O |
| ATOM | 883 | HG   | SER | 56 | 38.594 | 48.370 | 35.542 | 1.00 | 0.00 | H |
| ATOM | 884 | C    | SER | 56 | 38.450 | 47.907 | 38.011 | 1.00 | 0.00 | C |
| ATOM | 885 | O    | SER | 56 | 39.710 | 48.080 | 38.049 | 1.00 | 0.00 | O |
| ATOM | 886 | N    | LEU | 57 | 37.817 | 46.717 | 38.083 | 1.00 | 0.00 | N |
| ATOM | 887 | H    | LEU | 57 | 36.809 | 46.649 | 38.036 | 1.00 | 0.00 | H |
| ATOM | 888 | CA   | LEU | 57 | 38.620 | 45.497 | 38.313 | 1.00 | 0.00 | C |
| ATOM | 889 | HA   | LEU | 57 | 39.683 | 45.699 | 38.181 | 1.00 | 0.00 | H |
| ATOM | 890 | CB   | LEU | 57 | 38.407 | 44.968 | 39.737 | 1.00 | 0.00 | C |
| ATOM | 891 | HB2  | LEU | 57 | 37.342 | 44.795 | 39.901 | 1.00 | 0.00 | H |
| ATOM | 892 | HB3  | LEU | 57 | 38.890 | 43.991 | 39.786 | 1.00 | 0.00 | H |
| ATOM | 893 | CG   | LEU | 57 | 38.984 | 45.837 | 40.862 | 1.00 | 0.00 | C |
| ATOM | 894 | HG   | LEU | 57 | 39.838 | 46.400 | 40.491 | 1.00 | 0.00 | H |
| ATOM | 895 | CD1  | LEU | 57 | 37.927 | 46.827 | 41.333 | 1.00 | 0.00 | C |
| ATOM | 896 | HD11 | LEU | 57 | 38.309 | 47.386 | 42.184 | 1.00 | 0.00 | H |
| ATOM | 897 | HD12 | LEU | 57 | 37.683 | 47.535 | 40.549 | 1.00 | 0.00 | H |
| ATOM | 898 | HD13 | LEU | 57 | 37.024 | 46.292 | 41.624 | 1.00 | 0.00 | H |

|      |     |      |     |    |        |        |        |      |      |   |
|------|-----|------|-----|----|--------|--------|--------|------|------|---|
| ATOM | 899 | CD2  | LEU | 57 | 39.447 | 44.947 | 42.005 | 1.00 | 0.00 | C |
| ATOM | 900 | HD21 | LEU | 57 | 39.805 | 45.564 | 42.830 | 1.00 | 0.00 | H |
| ATOM | 901 | HD22 | LEU | 57 | 38.625 | 44.320 | 42.350 | 1.00 | 0.00 | H |
| ATOM | 902 | HD23 | LEU | 57 | 40.269 | 44.319 | 41.668 | 1.00 | 0.00 | H |
| ATOM | 903 | C    | LEU | 57 | 38.224 | 44.417 | 37.281 | 1.00 | 0.00 | C |
| ATOM | 904 | O    | LEU | 57 | 37.162 | 44.505 | 36.674 | 1.00 | 0.00 | O |
| ATOM | 905 | N    | LYS | 58 | 39.054 | 43.424 | 37.124 | 1.00 | 0.00 | N |
| ATOM | 906 | H    | LYS | 58 | 39.889 | 43.419 | 37.691 | 1.00 | 0.00 | H |
| ATOM | 907 | CA   | LYS | 58 | 38.842 | 42.247 | 36.268 | 1.00 | 0.00 | C |
| ATOM | 908 | HA   | LYS | 58 | 37.847 | 42.293 | 35.821 | 1.00 | 0.00 | H |
| ATOM | 909 | CB   | LYS | 58 | 39.873 | 42.228 | 35.139 | 1.00 | 0.00 | C |
| ATOM | 910 | HB2  | LYS | 58 | 40.872 | 42.231 | 35.575 | 1.00 | 0.00 | H |
| ATOM | 911 | HB3  | LYS | 58 | 39.753 | 41.300 | 34.578 | 1.00 | 0.00 | H |
| ATOM | 912 | CG   | LYS | 58 | 39.758 | 43.391 | 34.162 | 1.00 | 0.00 | C |
| ATOM | 913 | HG2  | LYS | 58 | 38.755 | 43.399 | 33.733 | 1.00 | 0.00 | H |
| ATOM | 914 | HG3  | LYS | 58 | 39.920 | 44.331 | 34.692 | 1.00 | 0.00 | H |
| ATOM | 915 | CD   | LYS | 58 | 40.781 | 43.275 | 33.042 | 1.00 | 0.00 | C |
| ATOM | 916 | HD2  | LYS | 58 | 41.784 | 43.265 | 33.472 | 1.00 | 0.00 | H |
| ATOM | 917 | HD3  | LYS | 58 | 40.619 | 42.340 | 32.503 | 1.00 | 0.00 | H |
| ATOM | 918 | CE   | LYS | 58 | 40.668 | 44.437 | 32.066 | 1.00 | 0.00 | C |
| ATOM | 919 | HE2  | LYS | 58 | 39.661 | 44.447 | 31.644 | 1.00 | 0.00 | H |
| ATOM | 920 | HE3  | LYS | 58 | 40.826 | 45.371 | 32.608 | 1.00 | 0.00 | H |
| ATOM | 921 | NZ   | LYS | 58 | 41.661 | 44.335 | 30.962 | 1.00 | 0.00 | N |
| ATOM | 922 | HZ1  | LYS | 58 | 41.514 | 43.475 | 30.452 | 1.00 | 0.00 | H |
| ATOM | 923 | HZ2  | LYS | 58 | 41.551 | 45.117 | 30.331 | 1.00 | 0.00 | H |
| ATOM | 924 | HZ3  | LYS | 58 | 42.597 | 44.340 | 31.342 | 1.00 | 0.00 | H |
| ATOM | 925 | C    | LYS | 58 | 38.915 | 40.920 | 37.115 | 1.00 | 0.00 | C |
| ATOM | 926 | O    | LYS | 58 | 39.540 | 40.900 | 38.174 | 1.00 | 0.00 | O |
| ATOM | 927 | N    | ILE | 59 | 38.457 | 39.804 | 36.543 | 1.00 | 0.00 | N |
| ATOM | 928 | H    | ILE | 59 | 38.022 | 39.852 | 35.634 | 1.00 | 0.00 | H |

|      |     |      |     |    |        |        |        |      |      |   |
|------|-----|------|-----|----|--------|--------|--------|------|------|---|
| ATOM | 929 | CA   | ILE | 59 | 38.451 | 38.500 | 37.227 | 1.00 | 0.00 | C |
| ATOM | 930 | HA   | ILE | 59 | 39.100 | 38.558 | 38.101 | 1.00 | 0.00 | H |
| ATOM | 931 | CB   | ILE | 59 | 37.035 | 38.157 | 37.727 | 1.00 | 0.00 | C |
| ATOM | 932 | HB   | ILE | 59 | 36.715 | 38.962 | 38.387 | 1.00 | 0.00 | H |
| ATOM | 933 | CG2  | ILE | 59 | 36.070 | 38.047 | 36.557 | 1.00 | 0.00 | C |
| ATOM | 934 | HG21 | ILE | 59 | 35.070 | 37.928 | 36.963 | 1.00 | 0.00 | H |
| ATOM | 935 | HG22 | ILE | 59 | 36.089 | 38.944 | 35.942 | 1.00 | 0.00 | H |
| ATOM | 936 | HG23 | ILE | 59 | 36.263 | 37.188 | 35.931 | 1.00 | 0.00 | H |
| ATOM | 937 | CG1  | ILE | 59 | 37.055 | 36.856 | 38.534 | 1.00 | 0.00 | C |
| ATOM | 938 | HG12 | ILE | 59 | 37.221 | 35.988 | 37.900 | 1.00 | 0.00 | H |
| ATOM | 939 | HG13 | ILE | 59 | 37.863 | 36.917 | 39.256 | 1.00 | 0.00 | H |
| ATOM | 940 | CD1  | ILE | 59 | 35.798 | 36.619 | 39.340 | 1.00 | 0.00 | C |
| ATOM | 941 | HD11 | ILE | 59 | 34.976 | 36.302 | 38.703 | 1.00 | 0.00 | H |
| ATOM | 942 | HD12 | ILE | 59 | 35.983 | 35.846 | 40.084 | 1.00 | 0.00 | H |
| ATOM | 943 | HD13 | ILE | 59 | 35.511 | 37.535 | 39.844 | 1.00 | 0.00 | H |
| ATOM | 944 | C    | ILE | 59 | 38.936 | 37.358 | 36.385 | 1.00 | 0.00 | C |
| ATOM | 945 | O    | ILE | 59 | 38.544 | 37.229 | 35.215 | 1.00 | 0.00 | O |
| ATOM | 946 | N    | GLU | 60 | 39.684 | 36.419 | 37.047 | 1.00 | 0.00 | N |
| ATOM | 947 | H    | GLU | 60 | 39.880 | 36.570 | 38.026 | 1.00 | 0.00 | H |
| ATOM | 948 | CA   | GLU | 60 | 40.232 | 35.223 | 36.466 | 1.00 | 0.00 | C |
| ATOM | 949 | HA   | GLU | 60 | 39.823 | 35.102 | 35.462 | 1.00 | 0.00 | H |
| ATOM | 950 | CB   | GLU | 60 | 41.748 | 35.378 | 36.328 | 1.00 | 0.00 | C |
| ATOM | 951 | HB2  | GLU | 60 | 41.942 | 36.284 | 35.750 | 1.00 | 0.00 | H |
| ATOM | 952 | HB3  | GLU | 60 | 42.183 | 35.507 | 37.321 | 1.00 | 0.00 | H |
| ATOM | 953 | CG   | GLU | 60 | 42.438 | 34.212 | 35.634 | 1.00 | 0.00 | C |
| ATOM | 954 | HG2  | GLU | 60 | 42.296 | 33.303 | 36.219 | 1.00 | 0.00 | H |
| ATOM | 955 | HG3  | GLU | 60 | 41.980 | 34.066 | 34.654 | 1.00 | 0.00 | H |
| ATOM | 956 | CD   | GLU | 60 | 43.915 | 34.431 | 35.452 | 1.00 | 0.00 | C |
| ATOM | 957 | OE1  | GLU | 60 | 44.396 | 35.465 | 35.848 | 1.00 | 0.00 | O |
| ATOM | 958 | OE2  | GLU | 60 | 44.562 | 33.563 | 34.915 | 1.00 | 0.00 | O |

|      |     |      |     |    |        |        |        |      |      |   |
|------|-----|------|-----|----|--------|--------|--------|------|------|---|
| ATOM | 959 | C    | GLU | 60 | 39.916 | 33.954 | 37.255 | 1.00 | 0.00 | C |
| ATOM | 960 | O    | GLU | 60 | 40.229 | 33.766 | 38.434 | 1.00 | 0.00 | O |
| ATOM | 961 | N    | ASN | 61 | 39.412 | 32.898 | 36.570 | 1.00 | 0.00 | N |
| ATOM | 962 | H    | ASN | 61 | 39.224 | 33.034 | 35.588 | 1.00 | 0.00 | H |
| ATOM | 963 | CA   | ASN | 61 | 39.053 | 31.617 | 37.092 | 1.00 | 0.00 | C |
| ATOM | 964 | HA   | ASN | 61 | 38.948 | 31.679 | 38.176 | 1.00 | 0.00 | H |
| ATOM | 965 | CB   | ASN | 61 | 37.743 | 31.113 | 36.516 | 1.00 | 0.00 | C |
| ATOM | 966 | HB2  | ASN | 61 | 36.972 | 31.855 | 36.729 | 1.00 | 0.00 | H |
| ATOM | 967 | HB3  | ASN | 61 | 37.820 | 31.010 | 35.433 | 1.00 | 0.00 | H |
| ATOM | 968 | CG   | ASN | 61 | 37.321 | 29.796 | 37.104 | 1.00 | 0.00 | C |
| ATOM | 969 | OD1  | ASN | 61 | 38.161 | 28.938 | 37.403 | 1.00 | 0.00 | O |
| ATOM | 970 | ND2  | ASN | 61 | 36.037 | 29.618 | 37.278 | 1.00 | 0.00 | N |
| ATOM | 971 | HD21 | ASN | 61 | 35.704 | 28.764 | 37.697 | 1.00 | 0.00 | H |
| ATOM | 972 | HD22 | ASN | 61 | 35.389 | 30.354 | 37.030 | 1.00 | 0.00 | H |
| ATOM | 973 | C    | ASN | 61 | 40.235 | 30.716 | 36.745 | 1.00 | 0.00 | C |
| ATOM | 974 | O    | ASN | 61 | 40.371 | 30.072 | 35.688 | 1.00 | 0.00 | O |
| ATOM | 975 | N    | GLU | 62 | 41.013 | 30.385 | 37.718 | 1.00 | 0.00 | N |
| ATOM | 976 | H    | GLU | 62 | 40.852 | 30.807 | 38.622 | 1.00 | 0.00 | H |
| ATOM | 977 | CA   | GLU | 62 | 42.250 | 29.540 | 37.596 | 1.00 | 0.00 | C |
| ATOM | 978 | HA   | GLU | 62 | 42.668 | 29.684 | 36.598 | 1.00 | 0.00 | H |
| ATOM | 979 | CB   | GLU | 62 | 43.291 | 30.030 | 38.605 | 1.00 | 0.00 | C |
| ATOM | 980 | HB2  | GLU | 62 | 42.925 | 29.915 | 39.620 | 1.00 | 0.00 | H |
| ATOM | 981 | HB3  | GLU | 62 | 44.170 | 29.395 | 38.500 | 1.00 | 0.00 | H |
| ATOM | 982 | CG   | GLU | 62 | 43.753 | 31.464 | 38.385 | 1.00 | 0.00 | C |
| ATOM | 983 | HG2  | GLU | 62 | 44.071 | 31.579 | 37.348 | 1.00 | 0.00 | H |
| ATOM | 984 | HG3  | GLU | 62 | 42.915 | 32.141 | 38.565 | 1.00 | 0.00 | H |
| ATOM | 985 | CD   | GLU | 62 | 44.896 | 31.853 | 39.281 | 1.00 | 0.00 | C |
| ATOM | 986 | OE1  | GLU | 62 | 45.605 | 30.981 | 39.721 | 1.00 | 0.00 | O |
| ATOM | 987 | OE2  | GLU | 62 | 45.060 | 33.026 | 39.525 | 1.00 | 0.00 | O |
| ATOM | 988 | C    | GLU | 62 | 42.051 | 27.998 | 37.792 | 1.00 | 0.00 | C |

|      |      |      |     |    |        |        |        |      |      |   |
|------|------|------|-----|----|--------|--------|--------|------|------|---|
| ATOM | 989  | O    | GLU | 62 | 43.028 | 27.236 | 37.989 | 1.00 | 0.00 | O |
| ATOM | 990  | N    | VAL | 63 | 40.822 | 27.530 | 37.786 | 1.00 | 0.00 | N |
| ATOM | 991  | H    | VAL | 63 | 40.055 | 28.170 | 37.625 | 1.00 | 0.00 | H |
| ATOM | 992  | CA   | VAL | 63 | 40.479 | 26.067 | 38.060 | 1.00 | 0.00 | C |
| ATOM | 993  | HA   | VAL | 63 | 39.417 | 25.936 | 37.850 | 1.00 | 0.00 | H |
| ATOM | 994  | CB   | VAL | 63 | 41.282 | 25.143 | 37.125 | 1.00 | 0.00 | C |
| ATOM | 995  | HB   | VAL | 63 | 42.356 | 25.237 | 37.221 | 1.00 | 0.00 | H |
| ATOM | 996  | CG1  | VAL | 63 | 41.024 | 23.683 | 37.469 | 1.00 | 0.00 | C |
| ATOM | 997  | HG11 | VAL | 63 | 41.526 | 23.060 | 36.728 | 1.00 | 0.00 | H |
| ATOM | 998  | HG12 | VAL | 63 | 41.436 | 23.400 | 38.436 | 1.00 | 0.00 | H |
| ATOM | 999  | HG13 | VAL | 63 | 39.965 | 23.460 | 37.410 | 1.00 | 0.00 | H |
| ATOM | 1000 | CG2  | VAL | 63 | 40.917 | 25.428 | 35.676 | 1.00 | 0.00 | C |
| ATOM | 1001 | HG21 | VAL | 63 | 39.891 | 25.119 | 35.483 | 1.00 | 0.00 | H |
| ATOM | 1002 | HG22 | VAL | 63 | 41.025 | 26.485 | 35.436 | 1.00 | 0.00 | H |
| ATOM | 1003 | HG23 | VAL | 63 | 41.582 | 24.867 | 35.020 | 1.00 | 0.00 | H |
| ATOM | 1004 | C    | VAL | 63 | 40.725 | 25.580 | 39.454 | 1.00 | 0.00 | C |
| ATOM | 1005 | O    | VAL | 63 | 40.015 | 24.779 | 40.062 | 1.00 | 0.00 | O |
| ATOM | 1006 | N    | ASN | 64 | 41.858 | 25.973 | 39.973 | 1.00 | 0.00 | N |
| ATOM | 1007 | H    | ASN | 64 | 42.394 | 26.605 | 39.413 | 1.00 | 0.00 | H |
| ATOM | 1008 | CA   | ASN | 64 | 42.469 | 25.745 | 41.310 | 1.00 | 0.00 | C |
| ATOM | 1009 | HA   | ASN | 64 | 42.209 | 24.735 | 41.626 | 1.00 | 0.00 | H |
| ATOM | 1010 | CB   | ASN | 64 | 43.978 | 25.840 | 41.170 | 1.00 | 0.00 | C |
| ATOM | 1011 | HB2  | ASN | 64 | 44.245 | 26.811 | 40.748 | 1.00 | 0.00 | H |
| ATOM | 1012 | HB3  | ASN | 64 | 44.436 | 25.758 | 42.155 | 1.00 | 0.00 | H |
| ATOM | 1013 | CG   | ASN | 64 | 44.547 | 24.749 | 40.306 | 1.00 | 0.00 | C |
| ATOM | 1014 | OD1  | ASN | 64 | 45.704 | 24.993 | 39.744 | 1.00 | 0.00 | O |
| ATOM | 1015 | ND2  | ASN | 64 | 43.939 | 23.684 | 40.148 | 1.00 | 0.00 | N |
| ATOM | 1016 | HD21 | ASN | 64 | 43.025 | 23.559 | 40.550 | 1.00 | 0.00 | H |
| ATOM | 1017 | HD22 | ASN | 64 | 44.339 | 22.998 | 39.527 | 1.00 | 0.00 | H |
| ATOM | 1018 | C    | ASN | 64 | 41.998 | 26.672 | 42.489 | 1.00 | 0.00 | C |

|      |      |      |     |    |        |        |        |      |      |   |
|------|------|------|-----|----|--------|--------|--------|------|------|---|
| ATOM | 1019 | O    | ASN | 64 | 41.729 | 26.246 | 43.609 | 1.00 | 0.00 | O |
| ATOM | 1020 | N    | THR | 65 | 41.830 | 27.937 | 42.150 | 1.00 | 0.00 | N |
| ATOM | 1021 | H    | THR | 65 | 42.016 | 28.160 | 41.182 | 1.00 | 0.00 | H |
| ATOM | 1022 | CA   | THR | 65 | 41.510 | 29.115 | 42.972 | 1.00 | 0.00 | C |
| ATOM | 1023 | HA   | THR | 65 | 40.820 | 28.815 | 43.761 | 1.00 | 0.00 | H |
| ATOM | 1024 | CB   | THR | 65 | 42.777 | 29.694 | 43.630 | 1.00 | 0.00 | C |
| ATOM | 1025 | HB   | THR | 65 | 43.298 | 28.897 | 44.161 | 1.00 | 0.00 | H |
| ATOM | 1026 | CG2  | THR | 65 | 43.698 | 30.292 | 42.579 | 1.00 | 0.00 | C |
| ATOM | 1027 | HG21 | THR | 65 | 44.618 | 30.626 | 43.060 | 1.00 | 0.00 | H |
| ATOM | 1028 | HG22 | THR | 65 | 43.964 | 29.545 | 41.831 | 1.00 | 0.00 | H |
| ATOM | 1029 | HG23 | THR | 65 | 43.242 | 31.153 | 42.089 | 1.00 | 0.00 | H |
| ATOM | 1030 | OG1  | THR | 65 | 42.407 | 30.710 | 44.571 | 1.00 | 0.00 | O |
| ATOM | 1031 | HG1  | THR | 65 | 42.284 | 31.535 | 44.094 | 1.00 | 0.00 | H |
| ATOM | 1032 | C    | THR | 65 | 40.811 | 30.200 | 42.085 | 1.00 | 0.00 | C |
| ATOM | 1033 | O    | THR | 65 | 40.825 | 30.152 | 40.835 | 1.00 | 0.00 | O |
| ATOM | 1034 | N    | ILE | 66 | 40.143 | 31.206 | 42.709 | 1.00 | 0.00 | N |
| ATOM | 1035 | H    | ILE | 66 | 40.112 | 31.262 | 43.717 | 1.00 | 0.00 | H |
| ATOM | 1036 | CA   | ILE | 66 | 39.615 | 32.368 | 41.898 | 1.00 | 0.00 | C |
| ATOM | 1037 | HA   | ILE | 66 | 39.749 | 32.189 | 40.833 | 1.00 | 0.00 | H |
| ATOM | 1038 | CB   | ILE | 66 | 38.112 | 32.577 | 42.158 | 1.00 | 0.00 | C |
| ATOM | 1039 | HB   | ILE | 66 | 37.969 | 32.859 | 43.203 | 1.00 | 0.00 | H |
| ATOM | 1040 | CG2  | ILE | 66 | 37.571 | 33.694 | 41.279 | 1.00 | 0.00 | C |
| ATOM | 1041 | HG21 | ILE | 66 | 36.482 | 33.725 | 41.343 | 1.00 | 0.00 | H |
| ATOM | 1042 | HG22 | ILE | 66 | 37.956 | 34.657 | 41.617 | 1.00 | 0.00 | H |
| ATOM | 1043 | HG23 | ILE | 66 | 37.865 | 33.552 | 40.238 | 1.00 | 0.00 | H |
| ATOM | 1044 | CG1  | ILE | 66 | 37.342 | 31.276 | 41.913 | 1.00 | 0.00 | C |
| ATOM | 1045 | HG12 | ILE | 66 | 37.699 | 30.486 | 42.573 | 1.00 | 0.00 | H |
| ATOM | 1046 | HG13 | ILE | 66 | 36.296 | 31.443 | 42.170 | 1.00 | 0.00 | H |
| ATOM | 1047 | CD1  | ILE | 66 | 37.402 | 30.791 | 40.483 | 1.00 | 0.00 | C |
| ATOM | 1048 | HD11 | ILE | 66 | 36.830 | 29.867 | 40.407 | 1.00 | 0.00 | H |

|      |      |      |     |    |        |        |        |      |      |   |
|------|------|------|-----|----|--------|--------|--------|------|------|---|
| ATOM | 1049 | HD12 | ILE | 66 | 36.952 | 31.513 | 39.803 | 1.00 | 0.00 | H |
| ATOM | 1050 | HD13 | ILE | 66 | 38.420 | 30.576 | 40.174 | 1.00 | 0.00 | H |
| ATOM | 1051 | C    | ILE | 66 | 40.411 | 33.706 | 42.235 | 1.00 | 0.00 | C |
| ATOM | 1052 | O    | ILE | 66 | 40.574 | 34.120 | 43.389 | 1.00 | 0.00 | O |
| ATOM | 1053 | N    | SER | 67 | 40.941 | 34.407 | 41.221 | 1.00 | 0.00 | N |
| ATOM | 1054 | H    | SER | 67 | 40.814 | 34.060 | 40.280 | 1.00 | 0.00 | H |
| ATOM | 1055 | CA   | SER | 67 | 41.680 | 35.677 | 41.360 | 1.00 | 0.00 | C |
| ATOM | 1056 | HA   | SER | 67 | 41.857 | 35.869 | 42.417 | 1.00 | 0.00 | H |
| ATOM | 1057 | CB   | SER | 67 | 43.042 | 35.514 | 40.715 | 1.00 | 0.00 | C |
| ATOM | 1058 | HB2  | SER | 67 | 42.917 | 35.217 | 39.674 | 1.00 | 0.00 | H |
| ATOM | 1059 | HB3  | SER | 67 | 43.583 | 36.460 | 40.748 | 1.00 | 0.00 | H |
| ATOM | 1060 | OG   | SER | 67 | 43.802 | 34.545 | 41.383 | 1.00 | 0.00 | O |
| ATOM | 1061 | HG   | SER | 67 | 44.306 | 34.042 | 40.727 | 1.00 | 0.00 | H |
| ATOM | 1062 | C    | SER | 67 | 41.032 | 36.940 | 40.788 | 1.00 | 0.00 | C |
| ATOM | 1063 | O    | SER | 67 | 40.245 | 36.860 | 39.816 | 1.00 | 0.00 | O |
| ATOM | 1064 | N    | VAL | 68 | 41.380 | 38.060 | 41.439 | 1.00 | 0.00 | N |
| ATOM | 1065 | H    | VAL | 68 | 42.028 | 37.984 | 42.208 | 1.00 | 0.00 | H |
| ATOM | 1066 | CA   | VAL | 68 | 40.884 | 39.393 | 41.114 | 1.00 | 0.00 | C |
| ATOM | 1067 | HA   | VAL | 68 | 40.146 | 39.330 | 40.313 | 1.00 | 0.00 | H |
| ATOM | 1068 | CB   | VAL | 68 | 40.235 | 40.067 | 42.337 | 1.00 | 0.00 | C |
| ATOM | 1069 | HB   | VAL | 68 | 40.957 | 40.129 | 43.149 | 1.00 | 0.00 | H |
| ATOM | 1070 | CG1  | VAL | 68 | 39.803 | 41.486 | 41.997 | 1.00 | 0.00 | C |
| ATOM | 1071 | HG11 | VAL | 68 | 39.271 | 41.923 | 42.842 | 1.00 | 0.00 | H |
| ATOM | 1072 | HG12 | VAL | 68 | 40.679 | 42.100 | 41.794 | 1.00 | 0.00 | H |
| ATOM | 1073 | HG13 | VAL | 68 | 39.150 | 41.484 | 41.124 | 1.00 | 0.00 | H |
| ATOM | 1074 | CG2  | VAL | 68 | 39.050 | 39.243 | 42.815 | 1.00 | 0.00 | C |
| ATOM | 1075 | HG21 | VAL | 68 | 38.556 | 39.754 | 43.641 | 1.00 | 0.00 | H |
| ATOM | 1076 | HG22 | VAL | 68 | 38.335 | 39.113 | 42.001 | 1.00 | 0.00 | H |
| ATOM | 1077 | HG23 | VAL | 68 | 39.381 | 38.263 | 43.157 | 1.00 | 0.00 | H |
| ATOM | 1078 | C    | VAL | 68 | 42.083 | 40.204 | 40.630 | 1.00 | 0.00 | C |

|      |      |      |     |    |        |        |        |      |      |   |
|------|------|------|-----|----|--------|--------|--------|------|------|---|
| ATOM | 1079 | O    | VAL | 68 | 43.084 | 40.360 | 41.290 | 1.00 | 0.00 | O |
| ATOM | 1080 | N    | ARG | 69 | 41.962 | 40.912 | 39.509 | 1.00 | 0.00 | N |
| ATOM | 1081 | H    | ARG | 69 | 41.102 | 40.811 | 38.995 | 1.00 | 0.00 | H |
| ATOM | 1082 | CA   | ARG | 69 | 42.946 | 41.874 | 38.951 | 1.00 | 0.00 | C |
| ATOM | 1083 | HA   | ARG | 69 | 43.826 | 41.843 | 39.586 | 1.00 | 0.00 | H |
| ATOM | 1084 | CB   | ARG | 69 | 43.375 | 41.384 | 37.576 | 1.00 | 0.00 | C |
| ATOM | 1085 | HB2  | ARG | 69 | 42.488 | 41.287 | 36.950 | 1.00 | 0.00 | H |
| ATOM | 1086 | HB3  | ARG | 69 | 44.027 | 42.132 | 37.120 | 1.00 | 0.00 | H |
| ATOM | 1087 | CG   | ARG | 69 | 44.125 | 40.062 | 37.573 | 1.00 | 0.00 | C |
| ATOM | 1088 | HG2  | ARG | 69 | 45.037 | 40.168 | 38.163 | 1.00 | 0.00 | H |
| ATOM | 1089 | HG3  | ARG | 69 | 43.503 | 39.291 | 38.030 | 1.00 | 0.00 | H |
| ATOM | 1090 | CD   | ARG | 69 | 44.473 | 39.630 | 36.195 | 1.00 | 0.00 | C |
| ATOM | 1091 | HD2  | ARG | 69 | 43.555 | 39.561 | 35.610 | 1.00 | 0.00 | H |
| ATOM | 1092 | HD3  | ARG | 69 | 45.114 | 40.376 | 35.724 | 1.00 | 0.00 | H |
| ATOM | 1093 | NE   | ARG | 69 | 45.110 | 38.323 | 36.180 | 1.00 | 0.00 | N |
| ATOM | 1094 | HE   | ARG | 69 | 44.516 | 37.507 | 36.085 | 1.00 | 0.00 | H |
| ATOM | 1095 | CZ   | ARG | 69 | 46.436 | 38.117 | 36.294 | 1.00 | 0.00 | C |
| ATOM | 1096 | NH1  | ARG | 69 | 47.251 | 39.140 | 36.430 | 1.00 | 0.00 | N |
| ATOM | 1097 | HH11 | ARG | 69 | 48.243 | 38.980 | 36.513 | 1.00 | 0.00 | H |
| ATOM | 1098 | HH12 | ARG | 69 | 46.873 | 40.071 | 36.493 | 1.00 | 0.00 | H |
| ATOM | 1099 | NH2  | ARG | 69 | 46.919 | 36.887 | 36.269 | 1.00 | 0.00 | N |
| ATOM | 1100 | HH21 | ARG | 69 | 47.904 | 36.713 | 36.374 | 1.00 | 0.00 | H |
| ATOM | 1101 | HH22 | ARG | 69 | 46.276 | 36.107 | 36.164 | 1.00 | 0.00 | H |
| ATOM | 1102 | C    | ARG | 69 | 42.574 | 43.341 | 38.794 | 1.00 | 0.00 | C |
| ATOM | 1103 | O    | ARG | 69 | 41.412 | 43.674 | 38.700 | 1.00 | 0.00 | O |
| ATOM | 1104 | N    | PHE | 70 | 43.554 | 44.201 | 38.996 | 1.00 | 0.00 | N |
| ATOM | 1105 | H    | PHE | 70 | 44.495 | 43.876 | 39.171 | 1.00 | 0.00 | H |
| ATOM | 1106 | CA   | PHE | 70 | 43.304 | 45.618 | 38.999 | 1.00 | 0.00 | C |
| ATOM | 1107 | HA   | PHE | 70 | 42.488 | 45.844 | 38.310 | 1.00 | 0.00 | H |
| ATOM | 1108 | CB   | PHE | 70 | 42.857 | 46.034 | 40.401 | 1.00 | 0.00 | C |



|      |      |          |    |        |        |        |      |      |   |
|------|------|----------|----|--------|--------|--------|------|------|---|
| ATOM | 1109 | HB2 PHE  | 70 | 42.739 | 47.117 | 40.454 | 1.00 | 0.00 | H |
| ATOM | 1110 | HB3 PHE  | 70 | 41.880 | 45.600 | 40.583 | 1.00 | 0.00 | H |
| ATOM | 1111 | CG PHE   | 70 | 43.773 | 45.564 | 41.494 | 1.00 | 0.00 | C |
| ATOM | 1112 | CD1 PHE  | 70 | 44.768 | 46.393 | 41.990 | 1.00 | 0.00 | C |
| ATOM | 1113 | HD1 PHE  | 70 | 44.887 | 47.392 | 41.596 | 1.00 | 0.00 | H |
| ATOM | 1114 | CE1 PHE  | 70 | 45.612 | 45.961 | 42.996 | 1.00 | 0.00 | C |
| ATOM | 1115 | HE1 PHE  | 70 | 46.360 | 46.629 | 43.398 | 1.00 | 0.00 | H |
| ATOM | 1116 | CZ PHE   | 70 | 45.470 | 44.694 | 43.519 | 1.00 | 0.00 | C |
| ATOM | 1117 | HZ PHE   | 70 | 46.116 | 44.351 | 44.310 | 1.00 | 0.00 | H |
| ATOM | 1118 | CE2 PHE  | 70 | 44.484 | 43.857 | 43.035 | 1.00 | 0.00 | C |
| ATOM | 1119 | HE2 PHE  | 70 | 44.367 | 42.867 | 43.441 | 1.00 | 0.00 | H |
| ATOM | 1120 | CD2 PHE  | 70 | 43.643 | 44.291 | 42.029 | 1.00 | 0.00 | C |
| ATOM | 1121 | HD2 PHE  | 70 | 42.870 | 43.626 | 41.673 | 1.00 | 0.00 | H |
| ATOM | 1122 | C PHE    | 70 | 44.493 | 46.494 | 38.564 | 1.00 | 0.00 | C |
| ATOM | 1123 | O PHE    | 70 | 45.627 | 46.000 | 38.481 | 1.00 | 0.00 | O |
| ATOM | 1124 | N ILE    | 71 | 44.263 | 47.812 | 38.302 | 1.00 | 0.00 | N |
| ATOM | 1125 | H ILE    | 71 | 43.318 | 48.122 | 38.478 | 1.00 | 0.00 | H |
| ATOM | 1126 | CA ILE   | 71 | 45.110 | 48.849 | 37.740 | 1.00 | 0.00 | C |
| ATOM | 1127 | HA ILE   | 71 | 45.464 | 48.493 | 36.777 | 1.00 | 0.00 | H |
| ATOM | 1128 | CB ILE   | 71 | 44.311 | 50.151 | 37.548 | 1.00 | 0.00 | C |
| ATOM | 1129 | HB ILE   | 71 | 43.904 | 50.459 | 38.512 | 1.00 | 0.00 | H |
| ATOM | 1130 | CG2 ILE  | 71 | 45.219 | 51.263 | 37.045 | 1.00 | 0.00 | C |
| ATOM | 1131 | HG21 ILE | 71 | 44.625 | 52.151 | 36.827 | 1.00 | 0.00 | H |
| ATOM | 1132 | HG22 ILE | 71 | 45.957 | 51.533 | 37.795 | 1.00 | 0.00 | H |
| ATOM | 1133 | HG23 ILE | 71 | 45.746 | 50.969 | 36.141 | 1.00 | 0.00 | H |
| ATOM | 1134 | CG1 ILE  | 71 | 43.148 | 49.925 | 36.578 | 1.00 | 0.00 | C |
| ATOM | 1135 | HG12 ILE | 71 | 42.449 | 49.198 | 36.992 | 1.00 | 0.00 | H |
| ATOM | 1136 | HG13 ILE | 71 | 42.603 | 50.863 | 36.467 | 1.00 | 0.00 | H |
| ATOM | 1137 | CD1 ILE  | 71 | 43.579 | 49.467 | 35.203 | 1.00 | 0.00 | C |
| ATOM | 1138 | HD11 ILE | 71 | 42.696 | 49.409 | 34.565 | 1.00 | 0.00 | H |

|      |      |      |     |    |        |        |        |      |      |   |
|------|------|------|-----|----|--------|--------|--------|------|------|---|
| ATOM | 1139 | HD12 | ILE | 71 | 44.268 | 50.173 | 34.742 | 1.00 | 0.00 | H |
| ATOM | 1140 | HD13 | ILE | 71 | 44.026 | 48.475 | 35.236 | 1.00 | 0.00 | H |
| ATOM | 1141 | C    | ILE | 71 | 46.332 | 49.126 | 38.615 | 1.00 | 0.00 | C |
| ATOM | 1142 | O    | ILE | 71 | 46.051 | 49.211 | 39.814 | 1.00 | 0.00 | O |
| ATOM | 1143 | N    | PRO | 72 | 47.598 | 49.124 | 38.159 | 1.00 | 0.00 | N |
| ATOM | 1144 | CD   | PRO | 72 | 47.969 | 48.931 | 36.725 | 1.00 | 0.00 | C |
| ATOM | 1145 | HD2  | PRO | 72 | 47.391 | 49.565 | 36.056 | 1.00 | 0.00 | H |
| ATOM | 1146 | HD3  | PRO | 72 | 47.850 | 47.880 | 36.458 | 1.00 | 0.00 | H |
| ATOM | 1147 | CG   | PRO | 72 | 49.424 | 49.314 | 36.680 | 1.00 | 0.00 | C |
| ATOM | 1148 | HG2  | PRO | 72 | 49.514 | 50.387 | 36.504 | 1.00 | 0.00 | H |
| ATOM | 1149 | HG3  | PRO | 72 | 49.955 | 48.763 | 35.902 | 1.00 | 0.00 | H |
| ATOM | 1150 | CB   | PRO | 72 | 49.940 | 48.973 | 38.036 | 1.00 | 0.00 | C |
| ATOM | 1151 | HB2  | PRO | 72 | 50.871 | 49.494 | 38.255 | 1.00 | 0.00 | H |
| ATOM | 1152 | HB3  | PRO | 72 | 50.101 | 47.898 | 38.075 | 1.00 | 0.00 | H |
| ATOM | 1153 | CA   | PRO | 72 | 48.799 | 49.363 | 38.981 | 1.00 | 0.00 | C |
| ATOM | 1154 | HA   | PRO | 72 | 48.799 | 48.719 | 39.861 | 1.00 | 0.00 | H |
| ATOM | 1155 | C    | PRO | 72 | 48.892 | 50.856 | 39.418 | 1.00 | 0.00 | C |
| ATOM | 1156 | O    | PRO | 72 | 49.640 | 51.683 | 38.846 | 1.00 | 0.00 | O |
| ATOM | 1157 | N    | LEU | 73 | 48.053 | 51.209 | 40.342 | 1.00 | 0.00 | N |
| ATOM | 1158 | H    | LEU | 73 | 47.459 | 50.495 | 40.742 | 1.00 | 0.00 | H |
| ATOM | 1159 | CA   | LEU | 73 | 47.859 | 52.561 | 40.832 | 1.00 | 0.00 | C |
| ATOM | 1160 | HA   | LEU | 73 | 48.548 | 53.228 | 40.316 | 1.00 | 0.00 | H |
| ATOM | 1161 | CB   | LEU | 73 | 46.425 | 52.995 | 40.503 | 1.00 | 0.00 | C |
| ATOM | 1162 | HB2  | LEU | 73 | 46.289 | 52.921 | 39.427 | 1.00 | 0.00 | H |
| ATOM | 1163 | HB3  | LEU | 73 | 45.729 | 52.293 | 40.967 | 1.00 | 0.00 | H |
| ATOM | 1164 | CG   | LEU | 73 | 46.049 | 54.422 | 40.923 | 1.00 | 0.00 | C |
| ATOM | 1165 | HG   | LEU | 73 | 46.187 | 54.590 | 41.987 | 1.00 | 0.00 | H |
| ATOM | 1166 | CD1  | LEU | 73 | 46.926 | 55.418 | 40.177 | 1.00 | 0.00 | C |
| ATOM | 1167 | HD11 | LEU | 73 | 46.595 | 56.433 | 40.397 | 1.00 | 0.00 | H |
| ATOM | 1168 | HD12 | LEU | 73 | 47.962 | 55.333 | 40.505 | 1.00 | 0.00 | H |

|      |      |      |     |    |        |        |        |      |      |   |
|------|------|------|-----|----|--------|--------|--------|------|------|---|
| ATOM | 1169 | HD13 | LEU | 73 | 46.867 | 55.248 | 39.101 | 1.00 | 0.00 | H |
| ATOM | 1170 | CD2  | LEU | 73 | 44.575 | 54.665 | 40.633 | 1.00 | 0.00 | C |
| ATOM | 1171 | HD21 | LEU | 73 | 44.307 | 55.682 | 40.922 | 1.00 | 0.00 | H |
| ATOM | 1172 | HD22 | LEU | 73 | 44.372 | 54.528 | 39.570 | 1.00 | 0.00 | H |
| ATOM | 1173 | HD23 | LEU | 73 | 43.969 | 53.969 | 41.213 | 1.00 | 0.00 | H |
| ATOM | 1174 | C    | LEU | 73 | 48.138 | 52.715 | 42.389 | 1.00 | 0.00 | C |
| ATOM | 1175 | O    | LEU | 73 | 47.165 | 52.719 | 43.078 | 1.00 | 0.00 | O |
| ATOM | 1176 | N    | ASP | 74 | 49.372 | 52.721 | 42.923 | 1.00 | 0.00 | N |
| ATOM | 1177 | H    | ASP | 74 | 50.148 | 52.639 | 42.291 | 1.00 | 0.00 | H |
| ATOM | 1178 | CA   | ASP | 74 | 49.724 | 52.942 | 44.337 | 1.00 | 0.00 | C |
| ATOM | 1179 | HA   | ASP | 74 | 48.824 | 52.913 | 44.952 | 1.00 | 0.00 | H |
| ATOM | 1180 | CB   | ASP | 74 | 50.687 | 51.864 | 44.840 | 1.00 | 0.00 | C |
| ATOM | 1181 | HB2  | ASP | 74 | 51.654 | 51.966 | 44.354 | 1.00 | 0.00 | H |
| ATOM | 1182 | HB3  | ASP | 74 | 50.838 | 52.009 | 45.910 | 1.00 | 0.00 | H |
| ATOM | 1183 | CG   | ASP | 74 | 50.154 | 50.452 | 44.637 | 1.00 | 0.00 | C |
| ATOM | 1184 | OD1  | ASP | 74 | 48.964 | 50.302 | 44.489 | 1.00 | 0.00 | O |
| ATOM | 1185 | OD2  | ASP | 74 | 50.942 | 49.536 | 44.631 | 1.00 | 0.00 | O |
| ATOM | 1186 | C    | ASP | 74 | 50.366 | 54.362 | 44.458 | 1.00 | 0.00 | C |
| ATOM | 1187 | O    | ASP | 74 | 50.715 | 54.951 | 43.448 | 1.00 | 0.00 | O |
| ATOM | 1188 | N    | ASP | 75 | 50.392 | 54.926 | 45.638 | 1.00 | 0.00 | N |
| ATOM | 1189 | H    | ASP | 75 | 50.050 | 54.428 | 46.448 | 1.00 | 0.00 | H |
| ATOM | 1190 | CA   | ASP | 75 | 50.863 | 56.355 | 45.817 | 1.00 | 0.00 | C |
| ATOM | 1191 | HA   | ASP | 75 | 50.722 | 56.897 | 44.882 | 1.00 | 0.00 | H |
| ATOM | 1192 | CB   | ASP | 75 | 49.994 | 57.048 | 46.869 | 1.00 | 0.00 | C |
| ATOM | 1193 | HB2  | ASP | 75 | 50.032 | 56.462 | 47.782 | 1.00 | 0.00 | H |
| ATOM | 1194 | HB3  | ASP | 75 | 50.397 | 58.040 | 47.078 | 1.00 | 0.00 | H |
| ATOM | 1195 | CG   | ASP | 75 | 48.546 | 57.211 | 46.427 | 1.00 | 0.00 | C |
| ATOM | 1196 | OD1  | ASP | 75 | 48.325 | 57.460 | 45.265 | 1.00 | 0.00 | O |
| ATOM | 1197 | OD2  | ASP | 75 | 47.675 | 57.086 | 47.254 | 1.00 | 0.00 | O |
| ATOM | 1198 | C    | ASP | 75 | 52.348 | 56.564 | 46.220 | 1.00 | 0.00 | C |

|      |      |      |     |    |        |        |        |      |      |   |
|------|------|------|-----|----|--------|--------|--------|------|------|---|
| ATOM | 1199 | O    | ASP | 75 | 52.967 | 57.596 | 45.919 | 1.00 | 0.00 | O |
| ATOM | 1200 | N    | PRO | 76 | 53.090 | 55.627 | 46.875 | 1.00 | 0.00 | N |
| ATOM | 1201 | CD   | PRO | 76 | 52.558 | 54.330 | 47.390 | 1.00 | 0.00 | C |
| ATOM | 1202 | HD2  | PRO | 76 | 52.164 | 53.690 | 46.607 | 1.00 | 0.00 | H |
| ATOM | 1203 | HD3  | PRO | 76 | 51.841 | 54.532 | 48.178 | 1.00 | 0.00 | H |
| ATOM | 1204 | CG   | PRO | 76 | 53.771 | 53.645 | 47.960 | 1.00 | 0.00 | C |
| ATOM | 1205 | HG2  | PRO | 76 | 54.273 | 53.102 | 47.161 | 1.00 | 0.00 | H |
| ATOM | 1206 | HG3  | PRO | 76 | 53.503 | 52.964 | 48.766 | 1.00 | 0.00 | H |
| ATOM | 1207 | CB   | PRO | 76 | 54.635 | 54.760 | 48.441 | 1.00 | 0.00 | C |
| ATOM | 1208 | HB2  | PRO | 76 | 55.677 | 54.468 | 48.528 | 1.00 | 0.00 | H |
| ATOM | 1209 | HB3  | PRO | 76 | 54.284 | 55.113 | 49.403 | 1.00 | 0.00 | H |
| ATOM | 1210 | CA   | PRO | 76 | 54.484 | 55.842 | 47.367 | 1.00 | 0.00 | C |
| ATOM | 1211 | HA   | PRO | 76 | 54.575 | 56.824 | 47.832 | 1.00 | 0.00 | H |
| ATOM | 1212 | C    | PRO | 76 | 55.555 | 55.687 | 46.300 | 1.00 | 0.00 | C |
| ATOM | 1213 | O    | PRO | 76 | 55.340 | 55.118 | 45.268 | 1.00 | 0.00 | O |
| ATOM | 1214 | N    | THR | 77 | 56.743 | 56.182 | 46.522 | 1.00 | 0.00 | N |
| ATOM | 1215 | H    | THR | 77 | 56.867 | 56.718 | 47.368 | 1.00 | 0.00 | H |
| ATOM | 1216 | CA   | THR | 77 | 57.980 | 55.816 | 45.820 | 1.00 | 0.00 | C |
| ATOM | 1217 | HA   | THR | 77 | 57.922 | 54.767 | 45.523 | 1.00 | 0.00 | H |
| ATOM | 1218 | CB   | THR | 77 | 58.168 | 56.679 | 44.559 | 1.00 | 0.00 | C |
| ATOM | 1219 | HB   | THR | 77 | 58.259 | 57.728 | 44.843 | 1.00 | 0.00 | H |
| ATOM | 1220 | CG2  | THR | 77 | 59.422 | 56.259 | 43.807 | 1.00 | 0.00 | C |
| ATOM | 1221 | HG21 | THR | 77 | 59.468 | 56.780 | 42.850 | 1.00 | 0.00 | H |
| ATOM | 1222 | HG22 | THR | 77 | 60.312 | 56.521 | 44.378 | 1.00 | 0.00 | H |
| ATOM | 1223 | HG23 | THR | 77 | 59.411 | 55.183 | 43.625 | 1.00 | 0.00 | H |
| ATOM | 1224 | OG1  | THR | 77 | 57.029 | 56.532 | 43.701 | 1.00 | 0.00 | O |
| ATOM | 1225 | HG1  | THR | 77 | 56.766 | 55.608 | 43.710 | 1.00 | 0.00 | H |
| ATOM | 1226 | C    | THR | 77 | 59.216 | 55.985 | 46.831 | 1.00 | 0.00 | C |
| ATOM | 1227 | O    | THR | 77 | 59.250 | 56.793 | 47.736 | 1.00 | 0.00 | O |
| ATOM | 1228 | N    | ASN | 78 | 60.188 | 55.004 | 46.781 | 1.00 | 0.00 | N |

|      |      |      |     |    |        |        |        |      |      |   |
|------|------|------|-----|----|--------|--------|--------|------|------|---|
| ATOM | 1229 | H    | ASN | 78 | 60.111 | 54.256 | 46.106 | 1.00 | 0.00 | H |
| ATOM | 1230 | CA   | ASN | 78 | 61.392 | 55.088 | 47.588 | 1.00 | 0.00 | C |
| ATOM | 1231 | HA   | ASN | 78 | 61.964 | 54.197 | 47.332 | 1.00 | 0.00 | H |
| ATOM | 1232 | CB   | ASN | 78 | 62.176 | 56.324 | 47.187 | 1.00 | 0.00 | C |
| ATOM | 1233 | HB2  | ASN | 78 | 62.197 | 56.381 | 46.098 | 1.00 | 0.00 | H |
| ATOM | 1234 | HB3  | ASN | 78 | 61.710 | 57.237 | 47.559 | 1.00 | 0.00 | H |
| ATOM | 1235 | CG   | ASN | 78 | 63.608 | 56.274 | 47.642 | 1.00 | 0.00 | C |
| ATOM | 1236 | OD1  | ASN | 78 | 64.168 | 57.419 | 47.935 | 1.00 | 0.00 | O |
| ATOM | 1237 | ND2  | ASN | 78 | 64.207 | 55.195 | 47.728 | 1.00 | 0.00 | N |
| ATOM | 1238 | HD21 | ASN | 78 | 63.722 | 54.354 | 47.453 | 1.00 | 0.00 | H |
| ATOM | 1239 | HD22 | ASN | 78 | 65.178 | 55.165 | 47.998 | 1.00 | 0.00 | H |
| ATOM | 1240 | C    | ASN | 78 | 61.197 | 55.090 | 49.084 | 1.00 | 0.00 | C |
| ATOM | 1241 | O    | ASN | 78 | 61.779 | 55.898 | 49.731 | 1.00 | 0.00 | O |
| ATOM | 1242 | N    | LYS | 79 | 60.442 | 54.126 | 49.549 | 1.00 | 0.00 | N |
| ATOM | 1243 | H    | LYS | 79 | 60.066 | 53.499 | 48.853 | 1.00 | 0.00 | H |
| ATOM | 1244 | CA   | LYS | 79 | 59.974 | 53.853 | 50.902 | 1.00 | 0.00 | C |
| ATOM | 1245 | HA   | LYS | 79 | 60.407 | 54.578 | 51.590 | 1.00 | 0.00 | H |
| ATOM | 1246 | CB   | LYS | 79 | 58.449 | 53.943 | 50.980 | 1.00 | 0.00 | C |
| ATOM | 1247 | HB2  | LYS | 79 | 58.057 | 53.162 | 50.342 | 1.00 | 0.00 | H |
| ATOM | 1248 | HB3  | LYS | 79 | 58.133 | 53.740 | 52.003 | 1.00 | 0.00 | H |
| ATOM | 1249 | CG   | LYS | 79 | 57.874 | 55.279 | 50.529 | 1.00 | 0.00 | C |
| ATOM | 1250 | HG2  | LYS | 79 | 58.251 | 55.525 | 49.544 | 1.00 | 0.00 | H |
| ATOM | 1251 | HG3  | LYS | 79 | 56.797 | 55.216 | 50.421 | 1.00 | 0.00 | H |
| ATOM | 1252 | CD   | LYS | 79 | 58.224 | 56.390 | 51.507 | 1.00 | 0.00 | C |
| ATOM | 1253 | HD2  | LYS | 79 | 57.895 | 56.107 | 52.508 | 1.00 | 0.00 | H |
| ATOM | 1254 | HD3  | LYS | 79 | 59.304 | 56.541 | 51.515 | 1.00 | 0.00 | H |
| ATOM | 1255 | CE   | LYS | 79 | 57.553 | 57.700 | 51.122 | 1.00 | 0.00 | C |
| ATOM | 1256 | HE2  | LYS | 79 | 57.846 | 57.968 | 50.105 | 1.00 | 0.00 | H |
| ATOM | 1257 | HE3  | LYS | 79 | 56.471 | 57.555 | 51.144 | 1.00 | 0.00 | H |
| ATOM | 1258 | NZ   | LYS | 79 | 57.914 | 58.805 | 52.052 | 1.00 | 0.00 | N |

|      |      |     |     |    |        |        |        |      |      |   |
|------|------|-----|-----|----|--------|--------|--------|------|------|---|
| ATOM | 1259 | HZ1 | LYS | 79 | 57.727 | 58.520 | 53.002 | 1.00 | 0.00 | H |
| ATOM | 1260 | HZ2 | LYS | 79 | 58.892 | 59.033 | 51.947 | 1.00 | 0.00 | H |
| ATOM | 1261 | HZ3 | LYS | 79 | 57.349 | 59.614 | 51.835 | 1.00 | 0.00 | H |
| ATOM | 1262 | C   | LYS | 79 | 60.471 | 52.450 | 51.324 | 1.00 | 0.00 | C |
| ATOM | 1263 | O   | LYS | 79 | 61.504 | 52.030 | 50.730 | 1.00 | 0.00 | O |
| ATOM | 1264 | N   | PHE | 80 | 60.032 | 51.923 | 52.473 | 1.00 | 0.00 | N |
| ATOM | 1265 | H   | PHE | 80 | 59.272 | 52.404 | 52.931 | 1.00 | 0.00 | H |
| ATOM | 1266 | CA  | PHE | 80 | 60.427 | 50.633 | 53.091 | 1.00 | 0.00 | C |
| ATOM | 1267 | HA  | PHE | 80 | 61.462 | 50.737 | 53.411 | 1.00 | 0.00 | H |
| ATOM | 1268 | CB  | PHE | 80 | 59.568 | 50.356 | 54.327 | 1.00 | 0.00 | C |
| ATOM | 1269 | HB2 | PHE | 80 | 59.505 | 51.253 | 54.945 | 1.00 | 0.00 | H |
| ATOM | 1270 | HB3 | PHE | 80 | 58.577 | 50.085 | 53.996 | 1.00 | 0.00 | H |
| ATOM | 1271 | CG  | PHE | 80 | 60.064 | 49.213 | 55.166 | 1.00 | 0.00 | C |
| ATOM | 1272 | CD1 | PHE | 80 | 61.087 | 49.400 | 56.083 | 1.00 | 0.00 | C |
| ATOM | 1273 | HD1 | PHE | 80 | 61.513 | 50.383 | 56.220 | 1.00 | 0.00 | H |
| ATOM | 1274 | CE1 | PHE | 80 | 61.545 | 48.349 | 56.856 | 1.00 | 0.00 | C |
| ATOM | 1275 | HE1 | PHE | 80 | 62.361 | 48.501 | 57.547 | 1.00 | 0.00 | H |
| ATOM | 1276 | CZ  | PHE | 80 | 60.983 | 47.097 | 56.719 | 1.00 | 0.00 | C |
| ATOM | 1277 | HZ  | PHE | 80 | 61.332 | 46.281 | 57.328 | 1.00 | 0.00 | H |
| ATOM | 1278 | CE2 | PHE | 80 | 59.964 | 46.896 | 55.809 | 1.00 | 0.00 | C |
| ATOM | 1279 | HE2 | PHE | 80 | 59.517 | 45.918 | 55.703 | 1.00 | 0.00 | H |
| ATOM | 1280 | CD2 | PHE | 80 | 59.510 | 47.948 | 55.038 | 1.00 | 0.00 | C |
| ATOM | 1281 | HD2 | PHE | 80 | 58.702 | 47.785 | 54.343 | 1.00 | 0.00 | H |
| ATOM | 1282 | C   | PHE | 80 | 60.307 | 49.446 | 52.110 | 1.00 | 0.00 | C |
| ATOM | 1283 | O   | PHE | 80 | 59.392 | 49.449 | 51.281 | 1.00 | 0.00 | O |
| ATOM | 1284 | N   | PRO | 81 | 61.216 | 48.392 | 52.131 | 1.00 | 0.00 | N |
| ATOM | 1285 | CD  | PRO | 81 | 62.398 | 48.278 | 52.991 | 1.00 | 0.00 | C |
| ATOM | 1286 | HD2 | PRO | 81 | 62.116 | 47.907 | 53.974 | 1.00 | 0.00 | H |
| ATOM | 1287 | HD3 | PRO | 81 | 62.951 | 49.214 | 53.062 | 1.00 | 0.00 | H |
| ATOM | 1288 | CG  | PRO | 81 | 63.211 | 47.235 | 52.272 | 1.00 | 0.00 | C |

|      |      |     |     |    |        |        |        |      |      |   |
|------|------|-----|-----|----|--------|--------|--------|------|------|---|
| ATOM | 1289 | HG2 | PRO | 81 | 63.829 | 46.674 | 52.972 | 1.00 | 0.00 | H |
| ATOM | 1290 | HG3 | PRO | 81 | 63.825 | 47.717 | 51.510 | 1.00 | 0.00 | H |
| ATOM | 1291 | CB  | PRO | 81 | 62.197 | 46.361 | 51.616 | 1.00 | 0.00 | C |
| ATOM | 1292 | HB2 | PRO | 81 | 61.813 | 45.653 | 52.352 | 1.00 | 0.00 | H |
| ATOM | 1293 | HB3 | PRO | 81 | 62.627 | 45.834 | 50.766 | 1.00 | 0.00 | H |
| ATOM | 1294 | CA  | PRO | 81 | 61.092 | 47.329 | 51.181 | 1.00 | 0.00 | C |
| ATOM | 1295 | HA  | PRO | 81 | 61.310 | 47.721 | 50.193 | 1.00 | 0.00 | H |
| ATOM | 1296 | C   | PRO | 81 | 59.752 | 46.673 | 51.219 | 1.00 | 0.00 | C |
| ATOM | 1297 | O   | PRO | 81 | 59.067 | 46.661 | 52.172 | 1.00 | 0.00 | O |
| ATOM | 1298 | N   | SER | 82 | 59.470 | 46.089 | 50.049 | 1.00 | 0.00 | N |
| ATOM | 1299 | H   | SER | 82 | 60.168 | 46.118 | 49.319 | 1.00 | 0.00 | H |
| ATOM | 1300 | CA  | SER | 82 | 58.164 | 45.519 | 49.688 | 1.00 | 0.00 | C |
| ATOM | 1301 | HA  | SER | 82 | 58.345 | 44.657 | 49.045 | 1.00 | 0.00 | H |
| ATOM | 1302 | CB  | SER | 82 | 57.477 | 45.023 | 50.945 | 1.00 | 0.00 | C |
| ATOM | 1303 | HB2 | SER | 82 | 56.662 | 44.368 | 50.648 | 1.00 | 0.00 | H |
| ATOM | 1304 | HB3 | SER | 82 | 58.156 | 44.434 | 51.560 | 1.00 | 0.00 | H |
| ATOM | 1305 | OG  | SER | 82 | 56.937 | 46.090 | 51.676 | 1.00 | 0.00 | O |
| ATOM | 1306 | HG  | SER | 82 | 57.683 | 46.551 | 52.085 | 1.00 | 0.00 | H |
| ATOM | 1307 | C   | SER | 82 | 57.217 | 46.471 | 48.951 | 1.00 | 0.00 | C |
| ATOM | 1308 | O   | SER | 82 | 57.542 | 47.614 | 48.705 | 1.00 | 0.00 | O |
| ATOM | 1309 | N   | LEU | 83 | 56.080 | 45.964 | 48.501 | 1.00 | 0.00 | N |
| ATOM | 1310 | H   | LEU | 83 | 55.893 | 44.999 | 48.731 | 1.00 | 0.00 | H |
| ATOM | 1311 | CA  | LEU | 83 | 55.009 | 46.625 | 47.678 | 1.00 | 0.00 | C |
| ATOM | 1312 | HA  | LEU | 83 | 55.027 | 47.699 | 47.857 | 1.00 | 0.00 | H |
| ATOM | 1313 | CB  | LEU | 83 | 55.181 | 46.358 | 46.177 | 1.00 | 0.00 | C |
| ATOM | 1314 | HB2 | LEU | 83 | 56.154 | 46.743 | 45.866 | 1.00 | 0.00 | H |
| ATOM | 1315 | HB3 | LEU | 83 | 55.202 | 45.276 | 46.034 | 1.00 | 0.00 | H |
| ATOM | 1316 | CG  | LEU | 83 | 54.094 | 46.945 | 45.268 | 1.00 | 0.00 | C |
| ATOM | 1317 | HG  | LEU | 83 | 53.107 | 46.659 | 45.632 | 1.00 | 0.00 | H |
| ATOM | 1318 | CD1 | LEU | 83 | 54.200 | 48.464 | 45.264 | 1.00 | 0.00 | C |

|      |      |      |     |    |        |        |        |      |      |   |
|------|------|------|-----|----|--------|--------|--------|------|------|---|
| ATOM | 1319 | HD11 | LEU | 83 | 53.474 | 48.885 | 44.569 | 1.00 | 0.00 | H |
| ATOM | 1320 | HD12 | LEU | 83 | 53.990 | 48.864 | 46.256 | 1.00 | 0.00 | H |
| ATOM | 1321 | HD13 | LEU | 83 | 55.200 | 48.776 | 44.958 | 1.00 | 0.00 | H |
| ATOM | 1322 | CD2  | LEU | 83 | 54.249 | 46.382 | 43.863 | 1.00 | 0.00 | C |
| ATOM | 1323 | HD21 | LEU | 83 | 53.508 | 46.819 | 43.204 | 1.00 | 0.00 | H |
| ATOM | 1324 | HD22 | LEU | 83 | 55.242 | 46.612 | 43.475 | 1.00 | 0.00 | H |
| ATOM | 1325 | HD23 | LEU | 83 | 54.096 | 45.303 | 43.886 | 1.00 | 0.00 | H |
| ATOM | 1326 | C    | LEU | 83 | 53.679 | 46.020 | 48.204 | 1.00 | 0.00 | C |
| ATOM | 1327 | O    | LEU | 83 | 53.604 | 44.764 | 48.289 | 1.00 | 0.00 | O |
| ATOM | 1328 | N    | CYS | 84 | 52.689 | 46.904 | 48.424 | 1.00 | 0.00 | N |
| ATOM | 1329 | H    | CYS | 84 | 52.934 | 47.879 | 48.327 | 1.00 | 0.00 | H |
| ATOM | 1330 | CA   | CYS | 84 | 51.264 | 46.663 | 48.476 | 1.00 | 0.00 | C |
| ATOM | 1331 | HA   | CYS | 84 | 51.000 | 45.978 | 47.671 | 1.00 | 0.00 | H |
| ATOM | 1332 | CB   | CYS | 84 | 50.876 | 46.029 | 49.812 | 1.00 | 0.00 | C |
| ATOM | 1333 | HB2  | CYS | 84 | 49.807 | 45.815 | 49.803 | 1.00 | 0.00 | H |
| ATOM | 1334 | HB3  | CYS | 84 | 51.405 | 45.082 | 49.919 | 1.00 | 0.00 | H |
| ATOM | 1335 | SG   | CYS | 84 | 51.241 | 47.061 | 51.252 | 1.00 | 0.00 | S |
| ATOM | 1336 | HG   | CYS | 84 | 52.569 | 47.000 | 51.133 | 1.00 | 0.00 | H |
| ATOM | 1337 | C    | CYS | 84 | 50.497 | 47.979 | 48.279 | 1.00 | 0.00 | C |
| ATOM | 1338 | O    | CYS | 84 | 51.101 | 49.048 | 48.376 | 1.00 | 0.00 | O |
| ATOM | 1339 | N    | THR | 85 | 49.176 | 47.961 | 48.070 | 1.00 | 0.00 | N |
| ATOM | 1340 | H    | THR | 85 | 48.667 | 47.093 | 48.004 | 1.00 | 0.00 | H |
| ATOM | 1341 | CA   | THR | 85 | 48.484 | 49.225 | 47.770 | 1.00 | 0.00 | C |
| ATOM | 1342 | HA   | THR | 85 | 49.106 | 49.809 | 47.089 | 1.00 | 0.00 | H |
| ATOM | 1343 | CB   | THR | 85 | 47.158 | 48.946 | 47.039 | 1.00 | 0.00 | C |
| ATOM | 1344 | HB   | THR | 85 | 46.533 | 48.297 | 47.654 | 1.00 | 0.00 | H |
| ATOM | 1345 | CG2  | THR | 85 | 46.412 | 50.244 | 46.774 | 1.00 | 0.00 | C |
| ATOM | 1346 | HG21 | THR | 85 | 46.136 | 50.758 | 47.688 | 1.00 | 0.00 | H |
| ATOM | 1347 | HG22 | THR | 85 | 47.030 | 50.916 | 46.178 | 1.00 | 0.00 | H |
| ATOM | 1348 | HG23 | THR | 85 | 45.499 | 50.026 | 46.220 | 1.00 | 0.00 | H |



|      |      |      |     |    |        |        |        |      |      |   |
|------|------|------|-----|----|--------|--------|--------|------|------|---|
| ATOM | 1349 | OG1  | THR | 85 | 47.426 | 48.290 | 45.793 | 1.00 | 0.00 | O |
| ATOM | 1350 | HG1  | THR | 85 | 47.945 | 48.891 | 45.243 | 1.00 | 0.00 | H |
| ATOM | 1351 | C    | THR | 85 | 48.198 | 50.094 | 49.006 | 1.00 | 0.00 | C |
| ATOM | 1352 | O    | THR | 85 | 47.337 | 49.826 | 49.839 | 1.00 | 0.00 | O |
| ATOM | 1353 | N    | VAL | 86 | 49.137 | 51.024 | 49.315 | 1.00 | 0.00 | N |
| ATOM | 1354 | H    | VAL | 86 | 49.889 | 51.088 | 48.642 | 1.00 | 0.00 | H |
| ATOM | 1355 | CA   | VAL | 86 | 49.270 | 52.006 | 50.409 | 1.00 | 0.00 | C |
| ATOM | 1356 | HA   | VAL | 86 | 48.315 | 52.074 | 50.931 | 1.00 | 0.00 | H |
| ATOM | 1357 | CB   | VAL | 86 | 50.342 | 51.552 | 51.417 | 1.00 | 0.00 | C |
| ATOM | 1358 | HB   | VAL | 86 | 50.336 | 52.220 | 52.273 | 1.00 | 0.00 | H |
| ATOM | 1359 | CG1  | VAL | 86 | 50.012 | 50.169 | 51.958 | 1.00 | 0.00 | C |
| ATOM | 1360 | HG11 | VAL | 86 | 50.728 | 49.885 | 52.730 | 1.00 | 0.00 | H |
| ATOM | 1361 | HG12 | VAL | 86 | 49.009 | 50.157 | 52.373 | 1.00 | 0.00 | H |
| ATOM | 1362 | HG13 | VAL | 86 | 50.050 | 49.445 | 51.151 | 1.00 | 0.00 | H |
| ATOM | 1363 | CG2  | VAL | 86 | 51.712 | 51.559 | 50.755 | 1.00 | 0.00 | C |
| ATOM | 1364 | HG21 | VAL | 86 | 52.425 | 51.051 | 51.398 | 1.00 | 0.00 | H |
| ATOM | 1365 | HG22 | VAL | 86 | 51.696 | 51.051 | 49.795 | 1.00 | 0.00 | H |
| ATOM | 1366 | HG23 | VAL | 86 | 52.066 | 52.580 | 50.612 | 1.00 | 0.00 | H |
| ATOM | 1367 | C    | VAL | 86 | 49.634 | 53.366 | 49.937 | 1.00 | 0.00 | C |
| ATOM | 1368 | O    | VAL | 86 | 49.787 | 53.578 | 48.745 | 1.00 | 0.00 | O |
| ATOM | 1369 | N    | ARG | 87 | 49.736 | 54.310 | 50.867 | 1.00 | 0.00 | N |
| ATOM | 1370 | H    | ARG | 87 | 49.476 | 54.042 | 51.804 | 1.00 | 0.00 | H |
| ATOM | 1371 | CA   | ARG | 87 | 50.301 | 55.676 | 50.738 | 1.00 | 0.00 | C |
| ATOM | 1372 | HA   | ARG | 87 | 49.956 | 56.068 | 49.786 | 1.00 | 0.00 | H |
| ATOM | 1373 | CB   | ARG | 87 | 49.669 | 56.545 | 51.815 | 1.00 | 0.00 | C |
| ATOM | 1374 | HB2  | ARG | 87 | 48.588 | 56.466 | 51.731 | 1.00 | 0.00 | H |
| ATOM | 1375 | HB3  | ARG | 87 | 49.953 | 56.171 | 52.800 | 1.00 | 0.00 | H |
| ATOM | 1376 | CG   | ARG | 87 | 49.994 | 58.027 | 51.714 | 1.00 | 0.00 | C |
| ATOM | 1377 | HG2  | ARG | 87 | 51.069 | 58.204 | 51.755 | 1.00 | 0.00 | H |
| ATOM | 1378 | HG3  | ARG | 87 | 49.626 | 58.396 | 50.755 | 1.00 | 0.00 | H |

|      |      |      |     |    |        |        |        |      |      |   |
|------|------|------|-----|----|--------|--------|--------|------|------|---|
| ATOM | 1379 | CD   | ARG | 87 | 49.347 | 58.807 | 52.800 | 1.00 | 0.00 | C |
| ATOM | 1380 | HD2  | ARG | 87 | 49.412 | 59.866 | 52.545 | 1.00 | 0.00 | H |
| ATOM | 1381 | HD3  | ARG | 87 | 48.293 | 58.531 | 52.849 | 1.00 | 0.00 | H |
| ATOM | 1382 | NE   | ARG | 87 | 50.008 | 58.605 | 54.080 | 1.00 | 0.00 | N |
| ATOM | 1383 | HE   | ARG | 87 | 51.001 | 58.415 | 54.056 | 1.00 | 0.00 | H |
| ATOM | 1384 | CZ   | ARG | 87 | 49.403 | 58.715 | 55.279 | 1.00 | 0.00 | C |
| ATOM | 1385 | NH1  | ARG | 87 | 48.127 | 59.025 | 55.345 | 1.00 | 0.00 | N |
| ATOM | 1386 | HH11 | ARG | 87 | 47.668 | 59.116 | 56.237 | 1.00 | 0.00 | H |
| ATOM | 1387 | HH12 | ARG | 87 | 47.619 | 59.214 | 54.493 | 1.00 | 0.00 | H |
| ATOM | 1388 | NH2  | ARG | 87 | 50.092 | 58.512 | 56.388 | 1.00 | 0.00 | N |
| ATOM | 1389 | HH21 | ARG | 87 | 51.072 | 58.276 | 56.322 | 1.00 | 0.00 | H |
| ATOM | 1390 | HH22 | ARG | 87 | 49.655 | 58.630 | 57.288 | 1.00 | 0.00 | H |
| ATOM | 1391 | C    | ARG | 87 | 51.812 | 55.933 | 50.805 | 1.00 | 0.00 | C |
| ATOM | 1392 | O    | ARG | 87 | 52.371 | 56.533 | 49.895 | 1.00 | 0.00 | O |
| ATOM | 1393 | N    | ASP | 88 | 52.416 | 55.579 | 51.932 | 1.00 | 0.00 | N |
| ATOM | 1394 | H    | ASP | 88 | 51.829 | 55.192 | 52.651 | 1.00 | 0.00 | H |
| ATOM | 1395 | CA   | ASP | 88 | 53.861 | 55.665 | 52.250 | 1.00 | 0.00 | C |
| ATOM | 1396 | HA   | ASP | 88 | 54.384 | 56.095 | 51.396 | 1.00 | 0.00 | H |
| ATOM | 1397 | CB   | ASP | 88 | 54.088 | 56.597 | 53.443 | 1.00 | 0.00 | C |
| ATOM | 1398 | HB2  | ASP | 88 | 53.586 | 56.230 | 54.336 | 1.00 | 0.00 | H |
| ATOM | 1399 | HB3  | ASP | 88 | 55.157 | 56.621 | 53.663 | 1.00 | 0.00 | H |
| ATOM | 1400 | CG   | ASP | 88 | 53.642 | 58.027 | 53.170 | 1.00 | 0.00 | C |
| ATOM | 1401 | OD1  | ASP | 88 | 54.094 | 58.596 | 52.205 | 1.00 | 0.00 | O |
| ATOM | 1402 | OD2  | ASP | 88 | 52.854 | 58.537 | 53.930 | 1.00 | 0.00 | O |
| ATOM | 1403 | C    | ASP | 88 | 54.500 | 54.329 | 52.558 | 1.00 | 0.00 | C |
| ATOM | 1404 | O    | ASP | 88 | 55.691 | 54.187 | 52.222 | 1.00 | 0.00 | O |
| ATOM | 1405 | N    | PRO | 89 | 53.870 | 53.418 | 53.335 | 1.00 | 0.00 | N |
| ATOM | 1406 | CD   | PRO | 89 | 52.494 | 53.653 | 53.782 | 1.00 | 0.00 | C |
| ATOM | 1407 | HD2  | PRO | 89 | 51.794 | 53.472 | 52.974 | 1.00 | 0.00 | H |
| ATOM | 1408 | HD3  | PRO | 89 | 52.327 | 54.608 | 54.273 | 1.00 | 0.00 | H |

|      |      |      |     |    |        |        |        |      |      |   |
|------|------|------|-----|----|--------|--------|--------|------|------|---|
| ATOM | 1409 | CG   | PRO | 89 | 52.366 | 52.557 | 54.806 | 1.00 | 0.00 | C |
| ATOM | 1410 | HG2  | PRO | 89 | 51.362 | 52.163 | 54.828 | 1.00 | 0.00 | H |
| ATOM | 1411 | HG3  | PRO | 89 | 52.638 | 52.944 | 55.790 | 1.00 | 0.00 | H |
| ATOM | 1412 | CB   | PRO | 89 | 53.364 | 51.535 | 54.382 | 1.00 | 0.00 | C |
| ATOM | 1413 | HB2  | PRO | 89 | 52.955 | 50.933 | 53.571 | 1.00 | 0.00 | H |
| ATOM | 1414 | HB3  | PRO | 89 | 53.642 | 50.887 | 55.214 | 1.00 | 0.00 | H |
| ATOM | 1415 | CA   | PRO | 89 | 54.563 | 52.358 | 53.898 | 1.00 | 0.00 | C |
| ATOM | 1416 | HA   | PRO | 89 | 55.113 | 52.727 | 54.765 | 1.00 | 0.00 | H |
| ATOM | 1417 | C    | PRO | 89 | 55.537 | 51.499 | 53.012 | 1.00 | 0.00 | C |
| ATOM | 1418 | O    | PRO | 89 | 56.584 | 51.089 | 53.486 | 1.00 | 0.00 | O |
| ATOM | 1419 | N    | THR | 90 | 55.246 | 51.254 | 51.706 | 1.00 | 0.00 | N |
| ATOM | 1420 | H    | THR | 90 | 54.414 | 51.690 | 51.337 | 1.00 | 0.00 | H |
| ATOM | 1421 | CA   | THR | 90 | 55.936 | 50.355 | 50.756 | 1.00 | 0.00 | C |
| ATOM | 1422 | HA   | THR | 90 | 56.831 | 49.959 | 51.235 | 1.00 | 0.00 | H |
| ATOM | 1423 | CB   | THR | 90 | 55.041 | 49.159 | 50.384 | 1.00 | 0.00 | C |
| ATOM | 1424 | HB   | THR | 90 | 55.610 | 48.432 | 49.823 | 1.00 | 0.00 | H |
| ATOM | 1425 | CG2  | THR | 90 | 54.515 | 48.476 | 51.637 | 1.00 | 0.00 | C |
| ATOM | 1426 | HG21 | THR | 90 | 54.166 | 47.484 | 51.359 | 1.00 | 0.00 | H |
| ATOM | 1427 | HG22 | THR | 90 | 55.322 | 48.364 | 52.363 | 1.00 | 0.00 | H |
| ATOM | 1428 | HG23 | THR | 90 | 53.698 | 49.043 | 52.085 | 1.00 | 0.00 | H |
| ATOM | 1429 | OG1  | THR | 90 | 53.935 | 49.614 | 49.593 | 1.00 | 0.00 | O |
| ATOM | 1430 | HG1  | THR | 90 | 53.230 | 48.965 | 49.646 | 1.00 | 0.00 | H |
| ATOM | 1431 | C    | THR | 90 | 56.373 | 51.060 | 49.476 | 1.00 | 0.00 | C |
| ATOM | 1432 | O    | THR | 90 | 56.119 | 52.255 | 49.329 | 1.00 | 0.00 | O |
| ATOM | 1433 | N    | ASP | 91 | 56.967 | 50.299 | 48.605 | 1.00 | 0.00 | N |
| ATOM | 1434 | H    | ASP | 91 | 57.097 | 49.328 | 48.837 | 1.00 | 0.00 | H |
| ATOM | 1435 | CA   | ASP | 91 | 57.613 | 50.783 | 47.364 | 1.00 | 0.00 | C |
| ATOM | 1436 | HA   | ASP | 91 | 57.748 | 49.932 | 46.702 | 1.00 | 0.00 | H |
| ATOM | 1437 | CB   | ASP | 91 | 56.659 | 51.711 | 46.609 | 1.00 | 0.00 | C |
| ATOM | 1438 | HB2  | ASP | 91 | 55.673 | 51.244 | 46.568 | 1.00 | 0.00 | H |

|      |      |     |     |    |        |        |        |      |      |   |
|------|------|-----|-----|----|--------|--------|--------|------|------|---|
| ATOM | 1439 | HB3 | ASP | 91 | 56.570 | 52.686 | 47.081 | 1.00 | 0.00 | H |
| ATOM | 1440 | CG  | ASP | 91 | 57.111 | 51.994 | 45.183 | 1.00 | 0.00 | C |
| ATOM | 1441 | OD1 | ASP | 91 | 58.277 | 51.834 | 44.907 | 1.00 | 0.00 | O |
| ATOM | 1442 | OD2 | ASP | 91 | 56.287 | 52.367 | 44.382 | 1.00 | 0.00 | O |
| ATOM | 1443 | C   | ASP | 91 | 58.949 | 51.523 | 47.611 | 1.00 | 0.00 | C |
| ATOM | 1444 | O   | ASP | 91 | 59.018 | 52.740 | 47.566 | 1.00 | 0.00 | O |
| ATOM | 1445 | N   | PRO | 92 | 60.045 | 50.712 | 47.551 | 1.00 | 0.00 | N |
| ATOM | 1446 | CD  | PRO | 92 | 59.914 | 49.225 | 47.654 | 1.00 | 0.00 | C |
| ATOM | 1447 | HD2 | PRO | 92 | 59.353 | 48.773 | 46.837 | 1.00 | 0.00 | H |
| ATOM | 1448 | HD3 | PRO | 92 | 59.515 | 48.966 | 48.632 | 1.00 | 0.00 | H |
| ATOM | 1449 | CG  | PRO | 92 | 61.353 | 48.790 | 47.573 | 1.00 | 0.00 | C |
| ATOM | 1450 | HG2 | PRO | 92 | 61.617 | 48.631 | 46.526 | 1.00 | 0.00 | H |
| ATOM | 1451 | HG3 | PRO | 92 | 61.542 | 47.875 | 48.130 | 1.00 | 0.00 | H |
| ATOM | 1452 | CB  | PRO | 92 | 62.123 | 49.954 | 48.095 | 1.00 | 0.00 | C |
| ATOM | 1453 | HB2 | PRO | 92 | 63.174 | 49.902 | 47.811 | 1.00 | 0.00 | H |
| ATOM | 1454 | HB3 | PRO | 92 | 62.053 | 49.959 | 49.183 | 1.00 | 0.00 | H |
| ATOM | 1455 | CA  | PRO | 92 | 61.386 | 51.174 | 47.532 | 1.00 | 0.00 | C |
| ATOM | 1456 | HA  | PRO | 92 | 61.499 | 52.011 | 48.216 | 1.00 | 0.00 | H |
| ATOM | 1457 | C   | PRO | 92 | 61.970 | 51.578 | 46.213 | 1.00 | 0.00 | C |
| ATOM | 1458 | O   | PRO | 92 | 63.160 | 51.507 | 45.937 | 1.00 | 0.00 | O |
| ATOM | 1459 | N   | ASP | 93 | 61.202 | 51.851 | 45.187 | 1.00 | 0.00 | N |
| ATOM | 1460 | H   | ASP | 93 | 60.204 | 51.828 | 45.355 | 1.00 | 0.00 | H |
| ATOM | 1461 | CA  | ASP | 93 | 61.572 | 52.232 | 43.829 | 1.00 | 0.00 | C |
| ATOM | 1462 | HA  | ASP | 93 | 60.638 | 52.419 | 43.300 | 1.00 | 0.00 | H |
| ATOM | 1463 | CB  | ASP | 93 | 62.382 | 53.529 | 43.885 | 1.00 | 0.00 | C |
| ATOM | 1464 | HB2 | ASP | 93 | 61.916 | 54.201 | 44.607 | 1.00 | 0.00 | H |
| ATOM | 1465 | HB3 | ASP | 93 | 63.403 | 53.346 | 44.224 | 1.00 | 0.00 | H |
| ATOM | 1466 | CG  | ASP | 93 | 62.411 | 54.268 | 42.553 | 1.00 | 0.00 | C |
| ATOM | 1467 | OD1 | ASP | 93 | 61.485 | 54.116 | 41.792 | 1.00 | 0.00 | O |
| ATOM | 1468 | OD2 | ASP | 93 | 63.358 | 54.977 | 42.310 | 1.00 | 0.00 | O |

|      |      |     |     |    |        |        |        |      |      |   |
|------|------|-----|-----|----|--------|--------|--------|------|------|---|
| ATOM | 1469 | C   | ASP | 93 | 62.370 | 51.172 | 43.025 | 1.00 | 0.00 | C |
| ATOM | 1470 | O   | ASP | 93 | 63.387 | 51.523 | 42.439 | 1.00 | 0.00 | O |
| ATOM | 1471 | N   | SER | 94 | 62.048 | 49.927 | 42.953 | 1.00 | 0.00 | N |
| ATOM | 1472 | H   | SER | 94 | 61.265 | 49.628 | 43.512 | 1.00 | 0.00 | H |
| ATOM | 1473 | CA  | SER | 94 | 62.644 | 48.915 | 42.114 | 1.00 | 0.00 | C |
| ATOM | 1474 | HA  | SER | 94 | 63.164 | 49.417 | 41.298 | 1.00 | 0.00 | H |
| ATOM | 1475 | CB  | SER | 94 | 63.684 | 48.175 | 42.894 | 1.00 | 0.00 | C |
| ATOM | 1476 | HB2 | SER | 94 | 64.207 | 47.480 | 42.237 | 1.00 | 0.00 | H |
| ATOM | 1477 | HB3 | SER | 94 | 64.409 | 48.887 | 43.290 | 1.00 | 0.00 | H |
| ATOM | 1478 | OG  | SER | 94 | 63.101 | 47.444 | 43.990 | 1.00 | 0.00 | O |
| ATOM | 1479 | HG  | SER | 94 | 62.886 | 46.561 | 43.677 | 1.00 | 0.00 | H |
| ATOM | 1480 | C   | SER | 94 | 61.566 | 47.980 | 41.402 | 1.00 | 0.00 | C |
| ATOM | 1481 | O   | SER | 94 | 61.947 | 46.979 | 40.774 | 1.00 | 0.00 | O |
| ATOM | 1482 | N   | PRO | 95 | 60.238 | 48.177 | 41.498 | 1.00 | 0.00 | N |
| ATOM | 1483 | CD  | PRO | 95 | 59.533 | 49.265 | 42.260 | 1.00 | 0.00 | C |
| ATOM | 1484 | HD2 | PRO | 95 | 59.836 | 50.260 | 41.932 | 1.00 | 0.00 | H |
| ATOM | 1485 | HD3 | PRO | 95 | 59.662 | 49.124 | 43.334 | 1.00 | 0.00 | H |
| ATOM | 1486 | CG  | PRO | 95 | 58.082 | 49.067 | 41.910 | 1.00 | 0.00 | C |
| ATOM | 1487 | HG2 | PRO | 95 | 57.836 | 49.649 | 41.020 | 1.00 | 0.00 | H |
| ATOM | 1488 | HG3 | PRO | 95 | 57.431 | 49.356 | 42.736 | 1.00 | 0.00 | H |
| ATOM | 1489 | CB  | PRO | 95 | 57.968 | 47.613 | 41.606 | 1.00 | 0.00 | C |
| ATOM | 1490 | HB2 | PRO | 95 | 57.079 | 47.402 | 41.014 | 1.00 | 0.00 | H |
| ATOM | 1491 | HB3 | PRO | 95 | 57.941 | 47.046 | 42.538 | 1.00 | 0.00 | H |
| ATOM | 1492 | CA  | PRO | 95 | 59.257 | 47.286 | 40.845 | 1.00 | 0.00 | C |
| ATOM | 1493 | HA  | PRO | 95 | 59.516 | 46.240 | 41.013 | 1.00 | 0.00 | H |
| ATOM | 1494 | C   | PRO | 95 | 59.087 | 47.535 | 39.327 | 1.00 | 0.00 | C |
| ATOM | 1495 | O   | PRO | 95 | 59.433 | 48.609 | 38.860 | 1.00 | 0.00 | O |
| ATOM | 1496 | N   | GLU | 96 | 58.490 | 46.603 | 38.624 | 1.00 | 0.00 | N |
| ATOM | 1497 | H   | GLU | 96 | 58.266 | 45.719 | 39.055 | 1.00 | 0.00 | H |
| ATOM | 1498 | CA  | GLU | 96 | 58.096 | 46.825 | 37.189 | 1.00 | 0.00 | C |

|      |      |     |     |    |        |        |        |      |      |   |
|------|------|-----|-----|----|--------|--------|--------|------|------|---|
| ATOM | 1499 | HA  | GLU | 96 | 58.767 | 47.559 | 36.742 | 1.00 | 0.00 | H |
| ATOM | 1500 | CB  | GLU | 96 | 58.246 | 45.526 | 36.395 | 1.00 | 0.00 | C |
| ATOM | 1501 | HB2 | GLU | 96 | 57.621 | 44.760 | 36.855 | 1.00 | 0.00 | H |
| ATOM | 1502 | HB3 | GLU | 96 | 57.884 | 45.698 | 35.380 | 1.00 | 0.00 | H |
| ATOM | 1503 | CG  | GLU | 96 | 59.674 | 45.008 | 36.300 | 1.00 | 0.00 | C |
| ATOM | 1504 | HG2 | GLU | 96 | 60.293 | 45.767 | 35.819 | 1.00 | 0.00 | H |
| ATOM | 1505 | HG3 | GLU | 96 | 60.062 | 44.834 | 37.305 | 1.00 | 0.00 | H |
| ATOM | 1506 | CD  | GLU | 96 | 59.781 | 43.726 | 35.523 | 1.00 | 0.00 | C |
| ATOM | 1507 | OE1 | GLU | 96 | 58.773 | 43.247 | 35.062 | 1.00 | 0.00 | O |
| ATOM | 1508 | OE2 | GLU | 96 | 60.873 | 43.224 | 35.390 | 1.00 | 0.00 | O |
| ATOM | 1509 | C   | GLU | 96 | 56.658 | 47.350 | 37.012 | 1.00 | 0.00 | C |
| ATOM | 1510 | O   | GLU | 96 | 56.316 | 47.838 | 35.947 | 1.00 | 0.00 | O |
| ATOM | 1511 | N   | TYR | 97 | 55.863 | 47.322 | 38.017 | 1.00 | 0.00 | N |
| ATOM | 1512 | H   | TYR | 97 | 56.215 | 46.960 | 38.892 | 1.00 | 0.00 | H |
| ATOM | 1513 | CA  | TYR | 97 | 54.440 | 47.775 | 38.008 | 1.00 | 0.00 | C |
| ATOM | 1514 | HA  | TYR | 97 | 54.376 | 48.756 | 37.536 | 1.00 | 0.00 | H |
| ATOM | 1515 | CB  | TYR | 97 | 53.525 | 46.801 | 37.261 | 1.00 | 0.00 | C |
| ATOM | 1516 | HB2 | TYR | 97 | 52.492 | 47.135 | 37.366 | 1.00 | 0.00 | H |
| ATOM | 1517 | HB3 | TYR | 97 | 53.766 | 46.838 | 36.198 | 1.00 | 0.00 | H |
| ATOM | 1518 | CG  | TYR | 97 | 53.633 | 45.372 | 37.743 | 1.00 | 0.00 | C |
| ATOM | 1519 | CD1 | TYR | 97 | 52.916 | 44.959 | 38.856 | 1.00 | 0.00 | C |
| ATOM | 1520 | HD1 | TYR | 97 | 52.319 | 45.650 | 39.395 | 1.00 | 0.00 | H |
| ATOM | 1521 | CE1 | TYR | 97 | 53.014 | 43.653 | 39.297 | 1.00 | 0.00 | C |
| ATOM | 1522 | HE1 | TYR | 97 | 52.442 | 43.326 | 40.151 | 1.00 | 0.00 | H |
| ATOM | 1523 | CZ  | TYR | 97 | 53.834 | 42.757 | 38.620 | 1.00 | 0.00 | C |
| ATOM | 1524 | OH  | TYR | 97 | 53.932 | 41.457 | 39.058 | 1.00 | 0.00 | O |
| ATOM | 1525 | HH  | TYR | 97 | 54.456 | 40.914 | 38.464 | 1.00 | 0.00 | H |
| ATOM | 1526 | CE2 | TYR | 97 | 54.547 | 43.168 | 37.512 | 1.00 | 0.00 | C |
| ATOM | 1527 | HE2 | TYR | 97 | 55.193 | 42.476 | 36.991 | 1.00 | 0.00 | H |
| ATOM | 1528 | CD2 | TYR | 97 | 54.449 | 44.473 | 37.072 | 1.00 | 0.00 | C |

|      |      |     |     |    |        |        |        |      |      |   |
|------|------|-----|-----|----|--------|--------|--------|------|------|---|
| ATOM | 1529 | HD2 | TYR | 97 | 55.010 | 44.788 | 36.203 | 1.00 | 0.00 | H |
| ATOM | 1530 | C   | TYR | 97 | 54.031 | 47.906 | 39.485 | 1.00 | 0.00 | C |
| ATOM | 1531 | O   | TYR | 97 | 54.538 | 47.162 | 40.348 | 1.00 | 0.00 | O |
| ATOM | 1532 | N   | HIP | 98 | 53.077 | 48.763 | 39.817 | 1.00 | 0.00 | N |
| ATOM | 1533 | H   | HIP | 98 | 52.696 | 49.362 | 39.099 | 1.00 | 0.00 | H |
| ATOM | 1534 | CA  | HIP | 98 | 52.363 | 48.744 | 41.147 | 1.00 | 0.00 | C |
| ATOM | 1535 | HA  | HIP | 98 | 53.093 | 48.586 | 41.938 | 1.00 | 0.00 | H |
| ATOM | 1536 | CB  | HIP | 98 | 51.677 | 50.092 | 41.391 | 1.00 | 0.00 | C |
| ATOM | 1537 | HB2 | HIP | 98 | 51.219 | 50.418 | 40.465 | 1.00 | 0.00 | H |
| ATOM | 1538 | HB3 | HIP | 98 | 50.888 | 49.981 | 42.133 | 1.00 | 0.00 | H |
| ATOM | 1539 | CG  | HIP | 98 | 52.611 | 51.167 | 41.854 | 1.00 | 0.00 | C |
| ATOM | 1540 | ND1 | HIP | 98 | 52.276 | 52.504 | 41.829 | 1.00 | 0.00 | N |
| ATOM | 1541 | HD1 | HIP | 98 | 51.405 | 52.888 | 41.493 | 1.00 | 0.00 | H |
| ATOM | 1542 | CE1 | HIP | 98 | 53.288 | 53.217 | 42.294 | 1.00 | 0.00 | C |
| ATOM | 1543 | HE1 | HIP | 98 | 53.303 | 54.292 | 42.421 | 1.00 | 0.00 | H |
| ATOM | 1544 | NE2 | HIP | 98 | 54.265 | 52.390 | 42.618 | 1.00 | 0.00 | N |
| ATOM | 1545 | HE2 | HIP | 98 | 55.146 | 52.658 | 43.042 | 1.00 | 0.00 | H |
| ATOM | 1546 | CD2 | HIP | 98 | 53.867 | 51.102 | 42.353 | 1.00 | 0.00 | C |
| ATOM | 1547 | HD2 | HIP | 98 | 54.457 | 50.213 | 42.518 | 1.00 | 0.00 | H |
| ATOM | 1548 | C   | HIP | 98 | 51.289 | 47.576 | 41.268 | 1.00 | 0.00 | C |
| ATOM | 1549 | O   | HIP | 98 | 50.797 | 46.992 | 40.313 | 1.00 | 0.00 | O |
| ATOM | 1550 | N   | LEU | 99 | 50.990 | 47.181 | 42.573 | 1.00 | 0.00 | N |
| ATOM | 1551 | H   | LEU | 99 | 51.358 | 47.709 | 43.353 | 1.00 | 0.00 | H |
| ATOM | 1552 | CA  | LEU | 99 | 50.239 | 45.998 | 42.855 | 1.00 | 0.00 | C |
| ATOM | 1553 | HA  | LEU | 99 | 50.901 | 45.145 | 42.713 | 1.00 | 0.00 | H |
| ATOM | 1554 | CB  | LEU | 99 | 49.762 | 46.034 | 44.312 | 1.00 | 0.00 | C |
| ATOM | 1555 | HB2 | LEU | 99 | 50.614 | 46.236 | 44.963 | 1.00 | 0.00 | H |
| ATOM | 1556 | HB3 | LEU | 99 | 49.082 | 46.880 | 44.403 | 1.00 | 0.00 | H |
| ATOM | 1557 | CG  | LEU | 99 | 49.045 | 44.771 | 44.807 | 1.00 | 0.00 | C |
| ATOM | 1558 | HG  | LEU | 99 | 48.310 | 44.454 | 44.071 | 1.00 | 0.00 | H |

|      |      |      |     |     |        |        |        |      |      |   |
|------|------|------|-----|-----|--------|--------|--------|------|------|---|
| ATOM | 1559 | CD1  | LEU | 99  | 50.058 | 43.649 | 44.987 | 1.00 | 0.00 | C |
| ATOM | 1560 | HD11 | LEU | 99  | 49.548 | 42.748 | 45.327 | 1.00 | 0.00 | H |
| ATOM | 1561 | HD12 | LEU | 99  | 50.547 | 43.420 | 44.041 | 1.00 | 0.00 | H |
| ATOM | 1562 | HD13 | LEU | 99  | 50.813 | 43.929 | 45.724 | 1.00 | 0.00 | H |
| ATOM | 1563 | CD2  | LEU | 99  | 48.327 | 45.075 | 46.114 | 1.00 | 0.00 | C |
| ATOM | 1564 | HD21 | LEU | 99  | 47.836 | 44.170 | 46.456 | 1.00 | 0.00 | H |
| ATOM | 1565 | HD22 | LEU | 99  | 49.025 | 45.419 | 46.872 | 1.00 | 0.00 | H |
| ATOM | 1566 | HD23 | LEU | 99  | 47.550 | 45.815 | 45.947 | 1.00 | 0.00 | H |
| ATOM | 1567 | C    | LEU | 99  | 49.031 | 45.868 | 41.878 | 1.00 | 0.00 | C |
| ATOM | 1568 | O    | LEU | 99  | 48.255 | 46.771 | 41.711 | 1.00 | 0.00 | O |
| ATOM | 1569 | N    | VAL | 100 | 48.804 | 44.689 | 41.268 | 1.00 | 0.00 | N |
| ATOM | 1570 | H    | VAL | 100 | 49.472 | 43.954 | 41.441 | 1.00 | 0.00 | H |
| ATOM | 1571 | CA   | VAL | 100 | 47.669 | 44.326 | 40.314 | 1.00 | 0.00 | C |
| ATOM | 1572 | HA   | VAL | 100 | 46.948 | 45.141 | 40.315 | 1.00 | 0.00 | H |
| ATOM | 1573 | CB   | VAL | 100 | 48.190 | 44.103 | 38.881 | 1.00 | 0.00 | C |
| ATOM | 1574 | HB   | VAL | 100 | 47.357 | 43.834 | 38.230 | 1.00 | 0.00 | H |
| ATOM | 1575 | CG1  | VAL | 100 | 48.802 | 45.383 | 38.332 | 1.00 | 0.00 | C |
| ATOM | 1576 | HG11 | VAL | 100 | 48.835 | 45.327 | 37.244 | 1.00 | 0.00 | H |
| ATOM | 1577 | HG12 | VAL | 100 | 48.219 | 46.256 | 38.626 | 1.00 | 0.00 | H |
| ATOM | 1578 | HG13 | VAL | 100 | 49.823 | 45.483 | 38.688 | 1.00 | 0.00 | H |
| ATOM | 1579 | CG2  | VAL | 100 | 49.207 | 42.971 | 38.870 | 1.00 | 0.00 | C |
| ATOM | 1580 | HG21 | VAL | 100 | 49.691 | 42.926 | 37.894 | 1.00 | 0.00 | H |
| ATOM | 1581 | HG22 | VAL | 100 | 49.985 | 43.124 | 39.617 | 1.00 | 0.00 | H |
| ATOM | 1582 | HG23 | VAL | 100 | 48.711 | 42.022 | 39.034 | 1.00 | 0.00 | H |
| ATOM | 1583 | C    | VAL | 100 | 46.944 | 43.090 | 40.718 | 1.00 | 0.00 | C |
| ATOM | 1584 | O    | VAL | 100 | 45.948 | 42.721 | 40.112 | 1.00 | 0.00 | O |
| ATOM | 1585 | N    | SER | 101 | 47.546 | 42.272 | 41.648 | 1.00 | 0.00 | N |
| ATOM | 1586 | H    | SER | 101 | 48.375 | 42.604 | 42.117 | 1.00 | 0.00 | H |
| ATOM | 1587 | CA   | SER | 101 | 47.103 | 40.897 | 41.971 | 1.00 | 0.00 | C |
| ATOM | 1588 | HA   | SER | 101 | 46.313 | 40.612 | 41.275 | 1.00 | 0.00 | H |



|      |      |     |     |     |        |        |        |      |      |   |
|------|------|-----|-----|-----|--------|--------|--------|------|------|---|
| ATOM | 1589 | CB  | SER | 101 | 48.268 | 39.961 | 41.715 | 1.00 | 0.00 | C |
| ATOM | 1590 | HB2 | SER | 101 | 49.134 | 40.279 | 42.290 | 1.00 | 0.00 | H |
| ATOM | 1591 | HB3 | SER | 101 | 47.984 | 38.955 | 42.023 | 1.00 | 0.00 | H |
| ATOM | 1592 | OG  | SER | 101 | 48.591 | 39.923 | 40.352 | 1.00 | 0.00 | O |
| ATOM | 1593 | HG  | SER | 101 | 49.034 | 40.744 | 40.126 | 1.00 | 0.00 | H |
| ATOM | 1594 | C   | SER | 101 | 46.551 | 40.623 | 43.414 | 1.00 | 0.00 | C |
| ATOM | 1595 | O   | SER | 101 | 47.273 | 40.695 | 44.407 | 1.00 | 0.00 | O |
| ATOM | 1596 | N   | MET | 102 | 45.271 | 40.209 | 43.521 | 1.00 | 0.00 | N |
| ATOM | 1597 | H   | MET | 102 | 44.701 | 40.146 | 42.687 | 1.00 | 0.00 | H |
| ATOM | 1598 | CA  | MET | 102 | 44.659 | 39.779 | 44.785 | 1.00 | 0.00 | C |
| ATOM | 1599 | HA  | MET | 102 | 45.441 | 39.511 | 45.492 | 1.00 | 0.00 | H |
| ATOM | 1600 | CB  | MET | 102 | 43.847 | 40.926 | 45.384 | 1.00 | 0.00 | C |
| ATOM | 1601 | HB2 | MET | 102 | 44.524 | 41.757 | 45.574 | 1.00 | 0.00 | H |
| ATOM | 1602 | HB3 | MET | 102 | 43.114 | 41.267 | 44.652 | 1.00 | 0.00 | H |
| ATOM | 1603 | CG  | MET | 102 | 43.131 | 40.580 | 46.683 | 1.00 | 0.00 | C |
| ATOM | 1604 | HG2 | MET | 102 | 43.756 | 39.910 | 47.274 | 1.00 | 0.00 | H |
| ATOM | 1605 | HG3 | MET | 102 | 42.971 | 41.493 | 47.256 | 1.00 | 0.00 | H |
| ATOM | 1606 | SD  | MET | 102 | 41.528 | 39.800 | 46.407 | 1.00 | 0.00 | S |
| ATOM | 1607 | CE  | MET | 102 | 40.529 | 41.223 | 45.979 | 1.00 | 0.00 | C |
| ATOM | 1608 | HE1 | MET | 102 | 41.158 | 42.031 | 45.607 | 1.00 | 0.00 | H |
| ATOM | 1609 | HE2 | MET | 102 | 39.812 | 40.945 | 45.209 | 1.00 | 0.00 | H |
| ATOM | 1610 | HE3 | MET | 102 | 39.992 | 41.564 | 46.860 | 1.00 | 0.00 | H |
| ATOM | 1611 | C   | MET | 102 | 43.763 | 38.509 | 44.562 | 1.00 | 0.00 | C |
| ATOM | 1612 | O   | MET | 102 | 42.867 | 38.545 | 43.719 | 1.00 | 0.00 | O |
| ATOM | 1613 | N   | HID | 103 | 43.793 | 37.492 | 45.416 | 1.00 | 0.00 | N |
| ATOM | 1614 | H   | HID | 103 | 44.458 | 37.522 | 46.177 | 1.00 | 0.00 | H |
| ATOM | 1615 | CA  | HID | 103 | 43.022 | 36.277 | 45.297 | 1.00 | 0.00 | C |
| ATOM | 1616 | HA  | HID | 103 | 42.095 | 36.493 | 44.765 | 1.00 | 0.00 | H |
| ATOM | 1617 | CB  | HID | 103 | 43.781 | 35.241 | 44.501 | 1.00 | 0.00 | C |
| ATOM | 1618 | HB2 | HID | 103 | 43.099 | 34.432 | 44.238 | 1.00 | 0.00 | H |

|      |      |     |     |     |        |        |        |      |      |   |
|------|------|-----|-----|-----|--------|--------|--------|------|------|---|
| ATOM | 1619 | HB3 | HID | 103 | 44.064 | 35.724 | 43.568 | 1.00 | 0.00 | H |
| ATOM | 1620 | CG  | HID | 103 | 45.000 | 34.626 | 45.049 | 1.00 | 0.00 | C |
| ATOM | 1621 | ND1 | HID | 103 | 46.273 | 34.873 | 44.651 | 1.00 | 0.00 | N |
| ATOM | 1622 | HD1 | HID | 103 | 46.533 | 35.464 | 43.875 | 1.00 | 0.00 | H |
| ATOM | 1623 | CE1 | HID | 103 | 47.145 | 34.292 | 45.531 | 1.00 | 0.00 | C |
| ATOM | 1624 | HE1 | HID | 103 | 48.223 | 34.344 | 45.496 | 1.00 | 0.00 | H |
| ATOM | 1625 | NE2 | HID | 103 | 46.399 | 33.543 | 46.403 | 1.00 | 0.00 | N |
| ATOM | 1626 | CD2 | HID | 103 | 45.078 | 33.710 | 46.103 | 1.00 | 0.00 | C |
| ATOM | 1627 | HD2 | HID | 103 | 44.247 | 33.295 | 46.653 | 1.00 | 0.00 | H |
| ATOM | 1628 | C   | HID | 103 | 42.619 | 35.573 | 46.655 | 1.00 | 0.00 | C |
| ATOM | 1629 | O   | HID | 103 | 43.104 | 35.919 | 47.717 | 1.00 | 0.00 | O |
| ATOM | 1630 | N   | PHE | 104 | 41.750 | 34.590 | 46.614 | 1.00 | 0.00 | N |
| ATOM | 1631 | H   | PHE | 104 | 41.448 | 34.302 | 45.693 | 1.00 | 0.00 | H |
| ATOM | 1632 | CA  | PHE | 104 | 41.009 | 34.009 | 47.686 | 1.00 | 0.00 | C |
| ATOM | 1633 | HA  | PHE | 104 | 41.170 | 34.601 | 48.585 | 1.00 | 0.00 | H |
| ATOM | 1634 | CB  | PHE | 104 | 39.515 | 34.070 | 47.359 | 1.00 | 0.00 | C |
| ATOM | 1635 | HB2 | PHE | 104 | 39.337 | 33.610 | 46.385 | 1.00 | 0.00 | H |
| ATOM | 1636 | HB3 | PHE | 104 | 38.972 | 33.479 | 48.098 | 1.00 | 0.00 | H |
| ATOM | 1637 | CG  | PHE | 104 | 38.951 | 35.462 | 47.362 | 1.00 | 0.00 | C |
| ATOM | 1638 | CD1 | PHE | 104 | 39.048 | 36.268 | 46.238 | 1.00 | 0.00 | C |
| ATOM | 1639 | HD1 | PHE | 104 | 39.518 | 35.888 | 45.342 | 1.00 | 0.00 | H |
| ATOM | 1640 | CE1 | PHE | 104 | 38.529 | 37.549 | 46.239 | 1.00 | 0.00 | C |
| ATOM | 1641 | HE1 | PHE | 104 | 38.630 | 38.175 | 45.369 | 1.00 | 0.00 | H |
| ATOM | 1642 | CZ  | PHE | 104 | 37.906 | 38.039 | 47.367 | 1.00 | 0.00 | C |
| ATOM | 1643 | HZ  | PHE | 104 | 37.483 | 39.032 | 47.361 | 1.00 | 0.00 | H |
| ATOM | 1644 | CE2 | PHE | 104 | 37.801 | 37.248 | 48.493 | 1.00 | 0.00 | C |
| ATOM | 1645 | HE2 | PHE | 104 | 37.309 | 37.626 | 49.377 | 1.00 | 0.00 | H |
| ATOM | 1646 | CD2 | PHE | 104 | 38.322 | 35.969 | 48.489 | 1.00 | 0.00 | C |
| ATOM | 1647 | HD2 | PHE | 104 | 38.249 | 35.365 | 49.382 | 1.00 | 0.00 | H |
| ATOM | 1648 | C   | PHE | 104 | 41.420 | 32.561 | 47.979 | 1.00 | 0.00 | C |

|      |      |     |     |     |        |        |        |      |      |   |
|------|------|-----|-----|-----|--------|--------|--------|------|------|---|
| ATOM | 1649 | O   | PHE | 104 | 41.521 | 31.697 | 47.054 | 1.00 | 0.00 | O |
| ATOM | 1650 | N   | HID | 105 | 41.359 | 32.195 | 49.286 | 1.00 | 0.00 | N |
| ATOM | 1651 | H   | HID | 105 | 41.238 | 32.944 | 49.954 | 1.00 | 0.00 | H |
| ATOM | 1652 | CA  | HID | 105 | 41.388 | 30.782 | 49.906 | 1.00 | 0.00 | C |
| ATOM | 1653 | HA  | HID | 105 | 41.201 | 30.066 | 49.104 | 1.00 | 0.00 | H |
| ATOM | 1654 | CB  | HID | 105 | 42.740 | 30.477 | 50.474 | 1.00 | 0.00 | C |
| ATOM | 1655 | HB2 | HID | 105 | 42.953 | 31.151 | 51.299 | 1.00 | 0.00 | H |
| ATOM | 1656 | HB3 | HID | 105 | 42.732 | 29.463 | 50.875 | 1.00 | 0.00 | H |
| ATOM | 1657 | CG  | HID | 105 | 43.869 | 30.571 | 49.491 | 1.00 | 0.00 | C |
| ATOM | 1658 | ND1 | HID | 105 | 44.273 | 29.641 | 48.621 | 1.00 | 0.00 | N |
| ATOM | 1659 | HD1 | HID | 105 | 43.863 | 28.724 | 48.499 | 1.00 | 0.00 | H |
| ATOM | 1660 | CE1 | HID | 105 | 45.319 | 30.172 | 47.898 | 1.00 | 0.00 | C |
| ATOM | 1661 | HE1 | HID | 105 | 45.848 | 29.685 | 47.094 | 1.00 | 0.00 | H |
| ATOM | 1662 | NE2 | HID | 105 | 45.605 | 31.400 | 48.388 | 1.00 | 0.00 | N |
| ATOM | 1663 | CD2 | HID | 105 | 44.615 | 31.688 | 49.311 | 1.00 | 0.00 | C |
| ATOM | 1664 | HD2 | HID | 105 | 44.518 | 32.610 | 49.868 | 1.00 | 0.00 | H |
| ATOM | 1665 | C   | HID | 105 | 40.327 | 30.559 | 51.002 | 1.00 | 0.00 | C |
| ATOM | 1666 | O   | HID | 105 | 40.225 | 31.410 | 51.897 | 1.00 | 0.00 | O |
| ATOM | 1667 | N   | SER | 106 | 39.706 | 29.398 | 50.940 | 1.00 | 0.00 | N |
| ATOM | 1668 | H   | SER | 106 | 39.895 | 28.740 | 50.196 | 1.00 | 0.00 | H |
| ATOM | 1669 | CA  | SER | 106 | 38.817 | 29.023 | 52.013 | 1.00 | 0.00 | C |
| ATOM | 1670 | HA  | SER | 106 | 39.225 | 29.367 | 52.958 | 1.00 | 0.00 | H |
| ATOM | 1671 | CB  | SER | 106 | 37.491 | 29.742 | 51.856 | 1.00 | 0.00 | C |
| ATOM | 1672 | HB2 | SER | 106 | 37.636 | 30.822 | 51.877 | 1.00 | 0.00 | H |
| ATOM | 1673 | HB3 | SER | 106 | 37.061 | 29.460 | 50.896 | 1.00 | 0.00 | H |
| ATOM | 1674 | OG  | SER | 106 | 36.599 | 29.376 | 52.873 | 1.00 | 0.00 | O |
| ATOM | 1675 | HG  | SER | 106 | 36.726 | 29.948 | 53.639 | 1.00 | 0.00 | H |
| ATOM | 1676 | C   | SER | 106 | 38.613 | 27.483 | 52.020 | 1.00 | 0.00 | C |
| ATOM | 1677 | O   | SER | 106 | 38.202 | 26.916 | 51.007 | 1.00 | 0.00 | O |
| ATOM | 1678 | N   | PRO | 107 | 39.091 | 26.747 | 53.020 | 1.00 | 0.00 | N |

|      |      |     |     |     |        |        |        |      |      |   |
|------|------|-----|-----|-----|--------|--------|--------|------|------|---|
| ATOM | 1679 | CD  | PRO | 107 | 39.048 | 25.324 | 52.985 | 1.00 | 0.00 | C |
| ATOM | 1680 | HD2 | PRO | 107 | 39.901 | 24.946 | 52.425 | 1.00 | 0.00 | H |
| ATOM | 1681 | HD3 | PRO | 107 | 38.107 | 24.948 | 52.582 | 1.00 | 0.00 | H |
| ATOM | 1682 | CG  | PRO | 107 | 39.162 | 24.976 | 54.445 | 1.00 | 0.00 | C |
| ATOM | 1683 | HG2 | PRO | 107 | 39.531 | 23.959 | 54.583 | 1.00 | 0.00 | H |
| ATOM | 1684 | HG3 | PRO | 107 | 38.189 | 25.092 | 54.926 | 1.00 | 0.00 | H |
| ATOM | 1685 | CB  | PRO | 107 | 40.117 | 25.982 | 54.992 | 1.00 | 0.00 | C |
| ATOM | 1686 | HB2 | PRO | 107 | 41.138 | 25.672 | 54.761 | 1.00 | 0.00 | H |
| ATOM | 1687 | HB3 | PRO | 107 | 39.998 | 26.104 | 56.069 | 1.00 | 0.00 | H |
| ATOM | 1688 | CA  | PRO | 107 | 39.775 | 27.272 | 54.241 | 1.00 | 0.00 | C |
| ATOM | 1689 | HA  | PRO | 107 | 39.052 | 27.844 | 54.824 | 1.00 | 0.00 | H |
| ATOM | 1690 | C   | PRO | 107 | 41.049 | 28.112 | 54.001 | 1.00 | 0.00 | C |
| ATOM | 1691 | O   | PRO | 107 | 41.690 | 28.136 | 52.974 | 1.00 | 0.00 | O |
| ATOM | 1692 | N   | ALA | 108 | 41.302 | 28.955 | 54.947 | 1.00 | 0.00 | N |
| ATOM | 1693 | H   | ALA | 108 | 40.725 | 28.951 | 55.774 | 1.00 | 0.00 | H |
| ATOM | 1694 | CA  | ALA | 108 | 42.459 | 29.888 | 54.935 | 1.00 | 0.00 | C |
| ATOM | 1695 | HA  | ALA | 108 | 42.415 | 30.517 | 54.047 | 1.00 | 0.00 | H |
| ATOM | 1696 | CB  | ALA | 108 | 42.327 | 30.783 | 56.230 | 1.00 | 0.00 | C |
| ATOM | 1697 | HB1 | ALA | 108 | 43.213 | 31.411 | 56.297 | 1.00 | 0.00 | H |
| ATOM | 1698 | HB2 | ALA | 108 | 41.429 | 31.399 | 56.172 | 1.00 | 0.00 | H |
| ATOM | 1699 | HB3 | ALA | 108 | 42.278 | 30.151 | 57.117 | 1.00 | 0.00 | H |
| ATOM | 1700 | C   | ALA | 108 | 43.702 | 28.994 | 54.859 | 1.00 | 0.00 | C |
| ATOM | 1701 | O   | ALA | 108 | 43.618 | 27.873 | 55.251 | 1.00 | 0.00 | O |
| ATOM | 1702 | N   | GLU | 109 | 44.836 | 29.422 | 54.239 | 1.00 | 0.00 | N |
| ATOM | 1703 | H   | GLU | 109 | 44.869 | 30.348 | 53.849 | 1.00 | 0.00 | H |
| ATOM | 1704 | CA  | GLU | 109 | 46.106 | 28.635 | 54.273 | 1.00 | 0.00 | C |
| ATOM | 1705 | HA  | GLU | 109 | 45.869 | 27.572 | 54.331 | 1.00 | 0.00 | H |
| ATOM | 1706 | CB  | GLU | 109 | 46.903 | 28.857 | 52.974 | 1.00 | 0.00 | C |
| ATOM | 1707 | HB2 | GLU | 109 | 47.121 | 29.919 | 52.855 | 1.00 | 0.00 | H |
| ATOM | 1708 | HB3 | GLU | 109 | 47.848 | 28.327 | 53.042 | 1.00 | 0.00 | H |

|      |      |     |     |     |        |        |        |      |      |   |
|------|------|-----|-----|-----|--------|--------|--------|------|------|---|
| ATOM | 1709 | CG  | GLU | 109 | 46.189 | 28.348 | 51.762 | 1.00 | 0.00 | C |
| ATOM | 1710 | HG2 | GLU | 109 | 45.835 | 27.340 | 51.961 | 1.00 | 0.00 | H |
| ATOM | 1711 | HG3 | GLU | 109 | 45.347 | 28.993 | 51.510 | 1.00 | 0.00 | H |
| ATOM | 1712 | CD  | GLU | 109 | 47.182 | 28.319 | 50.634 | 1.00 | 0.00 | C |
| ATOM | 1713 | OE1 | GLU | 109 | 47.966 | 29.276 | 50.437 | 1.00 | 0.00 | O |
| ATOM | 1714 | OE2 | GLU | 109 | 47.109 | 27.313 | 49.919 | 1.00 | 0.00 | O |
| ATOM | 1715 | C   | GLU | 109 | 46.984 | 28.980 | 55.503 | 1.00 | 0.00 | C |
| ATOM | 1716 | O   | GLU | 109 | 47.547 | 28.100 | 56.127 | 1.00 | 0.00 | O |
| ATOM | 1717 | N   | HIE | 110 | 47.027 | 30.206 | 56.004 | 1.00 | 0.00 | N |
| ATOM | 1718 | H   | HIE | 110 | 46.511 | 30.938 | 55.532 | 1.00 | 0.00 | H |
| ATOM | 1719 | CA  | HIE | 110 | 47.820 | 30.614 | 57.196 | 1.00 | 0.00 | C |
| ATOM | 1720 | HA  | HIE | 110 | 48.633 | 29.904 | 57.352 | 1.00 | 0.00 | H |
| ATOM | 1721 | CB  | HIE | 110 | 48.449 | 31.994 | 56.983 | 1.00 | 0.00 | C |
| ATOM | 1722 | HB2 | HIE | 110 | 47.680 | 32.694 | 56.659 | 1.00 | 0.00 | H |
| ATOM | 1723 | HB3 | HIE | 110 | 48.842 | 32.355 | 57.934 | 1.00 | 0.00 | H |
| ATOM | 1724 | CG  | HIE | 110 | 49.583 | 31.994 | 56.005 | 1.00 | 0.00 | C |
| ATOM | 1725 | ND1 | HIE | 110 | 49.412 | 32.283 | 54.667 | 1.00 | 0.00 | N |
| ATOM | 1726 | CE1 | HIE | 110 | 50.579 | 32.207 | 54.051 | 1.00 | 0.00 | C |
| ATOM | 1727 | HE1 | HIE | 110 | 50.753 | 32.402 | 53.003 | 1.00 | 0.00 | H |
| ATOM | 1728 | NE2 | HIE | 110 | 51.498 | 31.878 | 54.940 | 1.00 | 0.00 | N |
| ATOM | 1729 | HE2 | HIE | 110 | 52.484 | 31.809 | 54.748 | 1.00 | 0.00 | H |
| ATOM | 1730 | CD2 | HIE | 110 | 50.902 | 31.739 | 56.169 | 1.00 | 0.00 | C |
| ATOM | 1731 | HD2 | HIE | 110 | 51.386 | 31.481 | 57.096 | 1.00 | 0.00 | H |
| ATOM | 1732 | C   | HIE | 110 | 46.956 | 30.636 | 58.476 | 1.00 | 0.00 | C |
| ATOM | 1733 | O   | HIE | 110 | 45.769 | 30.859 | 58.425 | 1.00 | 0.00 | O |
| ATOM | 1734 | N   | VAL | 111 | 47.657 | 30.459 | 59.658 | 1.00 | 0.00 | N |
| ATOM | 1735 | H   | VAL | 111 | 48.655 | 30.307 | 59.636 | 1.00 | 0.00 | H |
| ATOM | 1736 | CA  | VAL | 111 | 46.942 | 30.446 | 60.987 | 1.00 | 0.00 | C |
| ATOM | 1737 | HA  | VAL | 111 | 45.871 | 30.565 | 60.817 | 1.00 | 0.00 | H |
| ATOM | 1738 | CB  | VAL | 111 | 47.149 | 29.086 | 61.679 | 1.00 | 0.00 | C |

|      |      |      |     |     |        |        |        |      |      |   |
|------|------|------|-----|-----|--------|--------|--------|------|------|---|
| ATOM | 1739 | HB   | VAL | 111 | 48.217 | 28.907 | 61.796 | 1.00 | 0.00 | H |
| ATOM | 1740 | CG1  | VAL | 111 | 46.510 | 29.088 | 63.060 | 1.00 | 0.00 | C |
| ATOM | 1741 | HG11 | VAL | 111 | 47.047 | 29.745 | 63.745 | 1.00 | 0.00 | H |
| ATOM | 1742 | HG12 | VAL | 111 | 45.464 | 29.390 | 62.997 | 1.00 | 0.00 | H |
| ATOM | 1743 | HG13 | VAL | 111 | 46.559 | 28.081 | 63.476 | 1.00 | 0.00 | H |
| ATOM | 1744 | CG2  | VAL | 111 | 46.571 | 27.973 | 60.819 | 1.00 | 0.00 | C |
| ATOM | 1745 | HG21 | VAL | 111 | 45.503 | 28.137 | 60.669 | 1.00 | 0.00 | H |
| ATOM | 1746 | HG22 | VAL | 111 | 47.059 | 27.933 | 59.847 | 1.00 | 0.00 | H |
| ATOM | 1747 | HG23 | VAL | 111 | 46.716 | 27.010 | 61.310 | 1.00 | 0.00 | H |
| ATOM | 1748 | C    | VAL | 111 | 47.407 | 31.573 | 61.960 | 1.00 | 0.00 | C |
| ATOM | 1749 | O    | VAL | 111 | 48.560 | 31.858 | 62.284 | 1.00 | 0.00 | O |
| ATOM | 1750 | N    | LEU | 112 | 46.381 | 32.261 | 62.454 | 1.00 | 0.00 | N |
| ATOM | 1751 | H    | LEU | 112 | 45.442 | 32.008 | 62.181 | 1.00 | 0.00 | H |
| ATOM | 1752 | CA   | LEU | 112 | 46.544 | 33.430 | 63.449 | 1.00 | 0.00 | C |
| ATOM | 1753 | HA   | LEU | 112 | 47.560 | 33.811 | 63.361 | 1.00 | 0.00 | H |
| ATOM | 1754 | CB   | LEU | 112 | 45.578 | 34.575 | 63.119 | 1.00 | 0.00 | C |
| ATOM | 1755 | HB2  | LEU | 112 | 44.610 | 34.153 | 62.844 | 1.00 | 0.00 | H |
| ATOM | 1756 | HB3  | LEU | 112 | 45.424 | 35.165 | 64.024 | 1.00 | 0.00 | H |
| ATOM | 1757 | CG   | LEU | 112 | 46.046 | 35.546 | 62.027 | 1.00 | 0.00 | C |
| ATOM | 1758 | HG   | LEU | 112 | 46.992 | 35.989 | 62.333 | 1.00 | 0.00 | H |
| ATOM | 1759 | CD1  | LEU | 112 | 46.242 | 34.786 | 60.722 | 1.00 | 0.00 | C |
| ATOM | 1760 | HD11 | LEU | 112 | 46.364 | 35.490 | 59.899 | 1.00 | 0.00 | H |
| ATOM | 1761 | HD12 | LEU | 112 | 47.150 | 34.187 | 60.772 | 1.00 | 0.00 | H |
| ATOM | 1762 | HD13 | LEU | 112 | 45.388 | 34.143 | 60.510 | 1.00 | 0.00 | H |
| ATOM | 1763 | CD2  | LEU | 112 | 45.021 | 36.658 | 61.864 | 1.00 | 0.00 | C |
| ATOM | 1764 | HD21 | LEU | 112 | 45.320 | 37.321 | 61.052 | 1.00 | 0.00 | H |
| ATOM | 1765 | HD22 | LEU | 112 | 44.037 | 36.244 | 61.649 | 1.00 | 0.00 | H |
| ATOM | 1766 | HD23 | LEU | 112 | 44.966 | 37.242 | 62.783 | 1.00 | 0.00 | H |
| ATOM | 1767 | C    | LEU | 112 | 46.292 | 32.975 | 64.902 | 1.00 | 0.00 | C |
| ATOM | 1768 | O    | LEU | 112 | 45.393 | 32.120 | 65.063 | 1.00 | 0.00 | O |

|      |      |     |     |     |        |        |        |      |      |   |
|------|------|-----|-----|-----|--------|--------|--------|------|------|---|
| ATOM | 1769 | N   | PRO | 113 | 46.905 | 33.615 | 65.935 | 1.00 | 0.00 | N |
| ATOM | 1770 | CD  | PRO | 113 | 47.986 | 34.561 | 65.696 | 1.00 | 0.00 | C |
| ATOM | 1771 | HD2 | PRO | 113 | 47.729 | 35.313 | 64.950 | 1.00 | 0.00 | H |
| ATOM | 1772 | HD3 | PRO | 113 | 48.898 | 34.030 | 65.429 | 1.00 | 0.00 | H |
| ATOM | 1773 | CG  | PRO | 113 | 48.128 | 35.207 | 67.048 | 1.00 | 0.00 | C |
| ATOM | 1774 | HG2 | PRO | 113 | 47.422 | 36.036 | 67.126 | 1.00 | 0.00 | H |
| ATOM | 1775 | HG3 | PRO | 113 | 49.140 | 35.571 | 67.215 | 1.00 | 0.00 | H |
| ATOM | 1776 | CB  | PRO | 113 | 47.742 | 34.137 | 68.012 | 1.00 | 0.00 | C |
| ATOM | 1777 | HB2 | PRO | 113 | 47.423 | 34.561 | 68.965 | 1.00 | 0.00 | H |
| ATOM | 1778 | HB3 | PRO | 113 | 48.586 | 33.461 | 68.161 | 1.00 | 0.00 | H |
| ATOM | 1779 | CA  | PRO | 113 | 46.608 | 33.386 | 67.306 | 1.00 | 0.00 | C |
| ATOM | 1780 | HA  | PRO | 113 | 46.666 | 32.322 | 67.541 | 1.00 | 0.00 | H |
| ATOM | 1781 | C   | PRO | 113 | 45.225 | 33.938 | 67.684 | 1.00 | 0.00 | C |
| ATOM | 1782 | O   | PRO | 113 | 44.740 | 34.886 | 67.095 | 1.00 | 0.00 | O |
| ATOM | 1783 | N   | CYS | 114 | 44.541 | 33.210 | 68.617 | 1.00 | 0.00 | N |
| ATOM | 1784 | H   | CYS | 114 | 44.969 | 32.403 | 69.049 | 1.00 | 0.00 | H |
| ATOM | 1785 | CA  | CYS | 114 | 43.201 | 33.693 | 69.138 | 1.00 | 0.00 | C |
| ATOM | 1786 | HA  | CYS | 114 | 42.747 | 32.881 | 69.707 | 1.00 | 0.00 | H |
| ATOM | 1787 | CB  | CYS | 114 | 43.396 | 34.890 | 70.068 | 1.00 | 0.00 | C |
| ATOM | 1788 | HB2 | CYS | 114 | 43.866 | 35.703 | 69.512 | 1.00 | 0.00 | H |
| ATOM | 1789 | HB3 | CYS | 114 | 42.421 | 35.236 | 70.413 | 1.00 | 0.00 | H |
| ATOM | 1790 | SG  | CYS | 114 | 44.406 | 34.536 | 71.526 | 1.00 | 0.00 | S |
| ATOM | 1791 | HG  | CYS | 114 | 43.521 | 33.716 | 72.118 | 1.00 | 0.00 | H |
| ATOM | 1792 | C   | CYS | 114 | 42.203 | 34.104 | 68.007 | 1.00 | 0.00 | C |
| ATOM | 1793 | O   | CYS | 114 | 41.740 | 35.244 | 67.933 | 1.00 | 0.00 | O |
| ATOM | 1794 | N   | ALA | 115 | 42.074 | 33.296 | 66.956 | 1.00 | 0.00 | N |
| ATOM | 1795 | H   | ALA | 115 | 42.572 | 32.418 | 66.986 | 1.00 | 0.00 | H |
| ATOM | 1796 | CA  | ALA | 115 | 41.213 | 33.514 | 65.728 | 1.00 | 0.00 | C |
| ATOM | 1797 | HA  | ALA | 115 | 40.378 | 34.161 | 66.000 | 1.00 | 0.00 | H |
| ATOM | 1798 | CB  | ALA | 115 | 42.085 | 34.248 | 64.788 | 1.00 | 0.00 | C |

|      |      |      |     |     |        |        |        |      |      |   |
|------|------|------|-----|-----|--------|--------|--------|------|------|---|
| ATOM | 1799 | HB1  | ALA | 115 | 42.918 | 33.613 | 64.484 | 1.00 | 0.00 | H |
| ATOM | 1800 | HB2  | ALA | 115 | 41.513 | 34.532 | 63.904 | 1.00 | 0.00 | H |
| ATOM | 1801 | HB3  | ALA | 115 | 42.476 | 35.155 | 65.253 | 1.00 | 0.00 | H |
| ATOM | 1802 | C    | ALA | 115 | 40.643 | 32.240 | 65.099 | 1.00 | 0.00 | C |
| ATOM | 1803 | O    | ALA | 115 | 41.276 | 31.222 | 65.189 | 1.00 | 0.00 | O |
| ATOM | 1804 | N    | ASN | 116 | 39.482 | 32.339 | 64.444 | 1.00 | 0.00 | N |
| ATOM | 1805 | H    | ASN | 116 | 38.970 | 33.207 | 64.386 | 1.00 | 0.00 | H |
| ATOM | 1806 | CA   | ASN | 116 | 39.011 | 31.126 | 63.696 | 1.00 | 0.00 | C |
| ATOM | 1807 | HA   | ASN | 116 | 39.826 | 30.423 | 63.521 | 1.00 | 0.00 | H |
| ATOM | 1808 | CB   | ASN | 116 | 37.914 | 30.386 | 64.439 | 1.00 | 0.00 | C |
| ATOM | 1809 | HB2  | ASN | 116 | 37.080 | 31.065 | 64.628 | 1.00 | 0.00 | H |
| ATOM | 1810 | HB3  | ASN | 116 | 37.549 | 29.572 | 63.811 | 1.00 | 0.00 | H |
| ATOM | 1811 | CG   | ASN | 116 | 38.386 | 29.815 | 65.747 | 1.00 | 0.00 | C |
| ATOM | 1812 | OD1  | ASN | 116 | 38.067 | 30.484 | 66.826 | 1.00 | 0.00 | O |
| ATOM | 1813 | ND2  | ASN | 116 | 39.040 | 28.767 | 65.781 | 1.00 | 0.00 | N |
| ATOM | 1814 | HD21 | ASN | 116 | 39.249 | 28.276 | 64.926 | 1.00 | 0.00 | H |
| ATOM | 1815 | HD22 | ASN | 116 | 39.383 | 28.431 | 66.668 | 1.00 | 0.00 | H |
| ATOM | 1816 | C    | ASN | 116 | 38.524 | 31.630 | 62.305 | 1.00 | 0.00 | C |
| ATOM | 1817 | O    | ASN | 116 | 37.286 | 31.798 | 62.054 | 1.00 | 0.00 | O |
| ATOM | 1818 | N    | PRO | 117 | 39.421 | 31.851 | 61.297 | 1.00 | 0.00 | N |
| ATOM | 1819 | CD   | PRO | 117 | 40.846 | 31.759 | 61.487 | 1.00 | 0.00 | C |
| ATOM | 1820 | HD2  | PRO | 117 | 41.175 | 30.730 | 61.338 | 1.00 | 0.00 | H |
| ATOM | 1821 | HD3  | PRO | 117 | 41.179 | 32.144 | 62.448 | 1.00 | 0.00 | H |
| ATOM | 1822 | CG   | PRO | 117 | 41.360 | 32.643 | 60.382 | 1.00 | 0.00 | C |
| ATOM | 1823 | HG2  | PRO | 117 | 42.364 | 32.347 | 60.079 | 1.00 | 0.00 | H |
| ATOM | 1824 | HG3  | PRO | 117 | 41.355 | 33.681 | 60.718 | 1.00 | 0.00 | H |
| ATOM | 1825 | CB   | PRO | 117 | 40.373 | 32.470 | 59.279 | 1.00 | 0.00 | C |
| ATOM | 1826 | HB2  | PRO | 117 | 40.564 | 31.522 | 58.772 | 1.00 | 0.00 | H |
| ATOM | 1827 | HB3  | PRO | 117 | 40.399 | 33.287 | 58.561 | 1.00 | 0.00 | H |
| ATOM | 1828 | CA   | PRO | 117 | 39.018 | 32.417 | 59.992 | 1.00 | 0.00 | C |



|      |      |     |     |     |        |        |        |      |      |   |
|------|------|-----|-----|-----|--------|--------|--------|------|------|---|
| ATOM | 1829 | HA  | PRO | 117 | 38.659 | 33.435 | 60.154 | 1.00 | 0.00 | H |
| ATOM | 1830 | C   | PRO | 117 | 37.955 | 31.613 | 59.129 | 1.00 | 0.00 | C |
| ATOM | 1831 | O   | PRO | 117 | 37.879 | 30.380 | 59.029 | 1.00 | 0.00 | O |
| ATOM | 1832 | N   | ASP | 118 | 37.160 | 32.403 | 58.367 | 1.00 | 0.00 | N |
| ATOM | 1833 | H   | ASP | 118 | 37.225 | 33.408 | 58.438 | 1.00 | 0.00 | H |
| ATOM | 1834 | CA  | ASP | 118 | 36.286 | 31.844 | 57.384 | 1.00 | 0.00 | C |
| ATOM | 1835 | HA  | ASP | 118 | 36.056 | 30.811 | 57.643 | 1.00 | 0.00 | H |
| ATOM | 1836 | CB  | ASP | 118 | 34.957 | 32.596 | 57.483 | 1.00 | 0.00 | C |
| ATOM | 1837 | HB2 | ASP | 118 | 35.124 | 33.659 | 57.295 | 1.00 | 0.00 | H |
| ATOM | 1838 | HB3 | ASP | 118 | 34.282 | 32.226 | 56.710 | 1.00 | 0.00 | H |
| ATOM | 1839 | CG  | ASP | 118 | 34.270 | 32.411 | 58.829 | 1.00 | 0.00 | C |
| ATOM | 1840 | OD1 | ASP | 118 | 34.062 | 31.286 | 59.218 | 1.00 | 0.00 | O |
| ATOM | 1841 | OD2 | ASP | 118 | 33.959 | 33.396 | 59.455 | 1.00 | 0.00 | O |
| ATOM | 1842 | C   | ASP | 118 | 36.728 | 31.815 | 55.901 | 1.00 | 0.00 | C |
| ATOM | 1843 | O   | ASP | 118 | 36.356 | 31.002 | 55.027 | 1.00 | 0.00 | O |
| ATOM | 1844 | N   | ALA | 119 | 37.496 | 32.787 | 55.559 | 1.00 | 0.00 | N |
| ATOM | 1845 | H   | ALA | 119 | 37.768 | 33.449 | 56.273 | 1.00 | 0.00 | H |
| ATOM | 1846 | CA  | ALA | 119 | 38.057 | 33.021 | 54.199 | 1.00 | 0.00 | C |
| ATOM | 1847 | HA  | ALA | 119 | 38.301 | 32.045 | 53.777 | 1.00 | 0.00 | H |
| ATOM | 1848 | CB  | ALA | 119 | 36.950 | 33.632 | 53.273 | 1.00 | 0.00 | C |
| ATOM | 1849 | HB1 | ALA | 119 | 37.379 | 33.873 | 52.300 | 1.00 | 0.00 | H |
| ATOM | 1850 | HB2 | ALA | 119 | 36.143 | 32.913 | 53.132 | 1.00 | 0.00 | H |
| ATOM | 1851 | HB3 | ALA | 119 | 36.539 | 34.530 | 53.724 | 1.00 | 0.00 | H |
| ATOM | 1852 | C   | ALA | 119 | 39.439 | 33.792 | 54.274 | 1.00 | 0.00 | C |
| ATOM | 1853 | O   | ALA | 119 | 39.708 | 34.287 | 55.378 | 1.00 | 0.00 | O |
| ATOM | 1854 | N   | GLU | 120 | 40.260 | 33.789 | 53.261 | 1.00 | 0.00 | N |
| ATOM | 1855 | H   | GLU | 120 | 40.002 | 33.294 | 52.419 | 1.00 | 0.00 | H |
| ATOM | 1856 | CA  | GLU | 120 | 41.602 | 34.378 | 53.309 | 1.00 | 0.00 | C |
| ATOM | 1857 | HA  | GLU | 120 | 41.629 | 35.118 | 54.106 | 1.00 | 0.00 | H |
| ATOM | 1858 | CB  | GLU | 120 | 42.633 | 33.295 | 53.635 | 1.00 | 0.00 | C |

|      |      |      |     |     |        |        |        |      |      |   |
|------|------|------|-----|-----|--------|--------|--------|------|------|---|
| ATOM | 1859 | HB2  | GLU | 120 | 42.390 | 32.892 | 54.612 | 1.00 | 0.00 | H |
| ATOM | 1860 | HB3  | GLU | 120 | 42.559 | 32.500 | 52.902 | 1.00 | 0.00 | H |
| ATOM | 1861 | CG   | GLU | 120 | 44.072 | 33.790 | 53.682 | 1.00 | 0.00 | C |
| ATOM | 1862 | HG2  | GLU | 120 | 44.358 | 34.203 | 52.714 | 1.00 | 0.00 | H |
| ATOM | 1863 | HG3  | GLU | 120 | 44.154 | 34.581 | 54.427 | 1.00 | 0.00 | H |
| ATOM | 1864 | CD   | GLU | 120 | 45.055 | 32.700 | 54.005 | 1.00 | 0.00 | C |
| ATOM | 1865 | OE1  | GLU | 120 | 45.295 | 31.872 | 53.159 | 1.00 | 0.00 | O |
| ATOM | 1866 | OE2  | GLU | 120 | 45.568 | 32.695 | 55.099 | 1.00 | 0.00 | O |
| ATOM | 1867 | C    | GLU | 120 | 41.999 | 35.082 | 52.007 | 1.00 | 0.00 | C |
| ATOM | 1868 | O    | GLU | 120 | 41.948 | 34.503 | 50.891 | 1.00 | 0.00 | O |
| ATOM | 1869 | N    | LEU | 121 | 42.735 | 36.236 | 52.070 | 1.00 | 0.00 | N |
| ATOM | 1870 | H    | LEU | 121 | 42.883 | 36.617 | 52.991 | 1.00 | 0.00 | H |
| ATOM | 1871 | CA   | LEU | 121 | 43.353 | 37.013 | 50.980 | 1.00 | 0.00 | C |
| ATOM | 1872 | HA   | LEU | 121 | 42.979 | 36.627 | 50.035 | 1.00 | 0.00 | H |
| ATOM | 1873 | CB   | LEU | 121 | 42.961 | 38.492 | 51.084 | 1.00 | 0.00 | C |
| ATOM | 1874 | HB2  | LEU | 121 | 43.474 | 38.910 | 51.945 | 1.00 | 0.00 | H |
| ATOM | 1875 | HB3  | LEU | 121 | 43.333 | 39.014 | 50.201 | 1.00 | 0.00 | H |
| ATOM | 1876 | CG   | LEU | 121 | 41.460 | 38.772 | 51.238 | 1.00 | 0.00 | C |
| ATOM | 1877 | HG   | LEU | 121 | 41.064 | 38.238 | 52.102 | 1.00 | 0.00 | H |
| ATOM | 1878 | CD1  | LEU | 121 | 41.244 | 40.260 | 51.480 | 1.00 | 0.00 | C |
| ATOM | 1879 | HD11 | LEU | 121 | 40.187 | 40.464 | 51.630 | 1.00 | 0.00 | H |
| ATOM | 1880 | HD12 | LEU | 121 | 41.785 | 40.575 | 52.373 | 1.00 | 0.00 | H |
| ATOM | 1881 | HD13 | LEU | 121 | 41.604 | 40.832 | 50.625 | 1.00 | 0.00 | H |
| ATOM | 1882 | CD2  | LEU | 121 | 40.726 | 38.309 | 49.989 | 1.00 | 0.00 | C |
| ATOM | 1883 | HD21 | LEU | 121 | 39.673 | 38.567 | 50.073 | 1.00 | 0.00 | H |
| ATOM | 1884 | HD22 | LEU | 121 | 41.147 | 38.786 | 49.106 | 1.00 | 0.00 | H |
| ATOM | 1885 | HD23 | LEU | 121 | 40.800 | 37.227 | 49.881 | 1.00 | 0.00 | H |
| ATOM | 1886 | C    | LEU | 121 | 44.860 | 36.897 | 50.997 | 1.00 | 0.00 | C |
| ATOM | 1887 | O    | LEU | 121 | 45.598 | 36.981 | 52.010 | 1.00 | 0.00 | O |
| ATOM | 1888 | N    | HIE | 122 | 45.357 | 36.923 | 49.726 | 1.00 | 0.00 | N |

|      |      |      |     |     |        |        |        |      |      |   |
|------|------|------|-----|-----|--------|--------|--------|------|------|---|
| ATOM | 1889 | H    | HIE | 122 | 44.727 | 36.884 | 48.936 | 1.00 | 0.00 | H |
| ATOM | 1890 | CA   | HIE | 122 | 46.765 | 37.123 | 49.470 | 1.00 | 0.00 | C |
| ATOM | 1891 | HA   | HIE | 122 | 47.267 | 37.396 | 50.388 | 1.00 | 0.00 | H |
| ATOM | 1892 | CB   | HIE | 122 | 47.533 | 35.921 | 48.889 | 1.00 | 0.00 | C |
| ATOM | 1893 | HB2  | HIE | 122 | 46.976 | 35.536 | 48.039 | 1.00 | 0.00 | H |
| ATOM | 1894 | HB3  | HIE | 122 | 48.506 | 36.257 | 48.533 | 1.00 | 0.00 | H |
| ATOM | 1895 | CG   | HIE | 122 | 47.767 | 34.800 | 49.889 | 1.00 | 0.00 | C |
| ATOM | 1896 | ND1  | HIE | 122 | 47.769 | 33.425 | 49.618 | 1.00 | 0.00 | N |
| ATOM | 1897 | CE1  | HIE | 122 | 47.940 | 32.725 | 50.750 | 1.00 | 0.00 | C |
| ATOM | 1898 | HE1  | HIE | 122 | 47.953 | 31.653 | 50.860 | 1.00 | 0.00 | H |
| ATOM | 1899 | NE2  | HIE | 122 | 48.303 | 33.640 | 51.686 | 1.00 | 0.00 | N |
| ATOM | 1900 | HE2  | HIE | 122 | 48.522 | 33.414 | 52.648 | 1.00 | 0.00 | H |
| ATOM | 1901 | CD2  | HIE | 122 | 48.188 | 34.899 | 51.191 | 1.00 | 0.00 | C |
| ATOM | 1902 | HD2  | HIE | 122 | 48.345 | 35.820 | 51.728 | 1.00 | 0.00 | H |
| ATOM | 1903 | C    | HIE | 122 | 46.877 | 38.323 | 48.516 | 1.00 | 0.00 | C |
| ATOM | 1904 | O    | HIE | 122 | 46.183 | 38.385 | 47.560 | 1.00 | 0.00 | O |
| ATOM | 1905 | N    | LEU | 123 | 47.837 | 39.219 | 48.705 | 1.00 | 0.00 | N |
| ATOM | 1906 | H    | LEU | 123 | 48.396 | 39.135 | 49.543 | 1.00 | 0.00 | H |
| ATOM | 1907 | CA   | LEU | 123 | 48.285 | 40.232 | 47.716 | 1.00 | 0.00 | C |
| ATOM | 1908 | HA   | LEU | 123 | 47.634 | 40.222 | 46.844 | 1.00 | 0.00 | H |
| ATOM | 1909 | CB   | LEU | 123 | 48.323 | 41.648 | 48.305 | 1.00 | 0.00 | C |
| ATOM | 1910 | HB2  | LEU | 123 | 49.127 | 41.699 | 49.035 | 1.00 | 0.00 | H |
| ATOM | 1911 | HB3  | LEU | 123 | 48.600 | 42.329 | 47.502 | 1.00 | 0.00 | H |
| ATOM | 1912 | CG   | LEU | 123 | 47.019 | 42.136 | 48.949 | 1.00 | 0.00 | C |
| ATOM | 1913 | HG   | LEU | 123 | 46.745 | 41.478 | 49.775 | 1.00 | 0.00 | H |
| ATOM | 1914 | CD1  | LEU | 123 | 47.221 | 43.538 | 49.506 | 1.00 | 0.00 | C |
| ATOM | 1915 | HD11 | LEU | 123 | 46.277 | 43.920 | 49.888 | 1.00 | 0.00 | H |
| ATOM | 1916 | HD12 | LEU | 123 | 47.948 | 43.519 | 50.315 | 1.00 | 0.00 | H |
| ATOM | 1917 | HD13 | LEU | 123 | 47.574 | 44.213 | 48.730 | 1.00 | 0.00 | H |
| ATOM | 1918 | CD2  | LEU | 123 | 45.903 | 42.113 | 47.916 | 1.00 | 0.00 | C |

|      |      |      |     |     |        |        |        |      |      |   |
|------|------|------|-----|-----|--------|--------|--------|------|------|---|
| ATOM | 1919 | HD21 | LEU | 123 | 44.987 | 42.509 | 48.355 | 1.00 | 0.00 | H |
| ATOM | 1920 | HD22 | LEU | 123 | 46.172 | 42.713 | 47.048 | 1.00 | 0.00 | H |
| ATOM | 1921 | HD23 | LEU | 123 | 45.716 | 41.089 | 47.605 | 1.00 | 0.00 | H |
| ATOM | 1922 | C    | LEU | 123 | 49.669 | 39.787 | 47.301 | 1.00 | 0.00 | C |
| ATOM | 1923 | O    | LEU | 123 | 50.539 | 39.562 | 48.172 | 1.00 | 0.00 | O |
| ATOM | 1924 | N    | VAL | 124 | 49.966 | 39.682 | 45.988 | 1.00 | 0.00 | N |
| ATOM | 1925 | H    | VAL | 124 | 49.257 | 39.912 | 45.305 | 1.00 | 0.00 | H |
| ATOM | 1926 | CA   | VAL | 124 | 51.230 | 39.066 | 45.489 | 1.00 | 0.00 | C |
| ATOM | 1927 | HA   | VAL | 124 | 51.972 | 39.013 | 46.288 | 1.00 | 0.00 | H |
| ATOM | 1928 | CB   | VAL | 124 | 51.009 | 37.654 | 44.914 | 1.00 | 0.00 | C |
| ATOM | 1929 | HB   | VAL | 124 | 51.967 | 37.255 | 44.576 | 1.00 | 0.00 | H |
| ATOM | 1930 | CG1  | VAL | 124 | 50.462 | 36.722 | 45.985 | 1.00 | 0.00 | C |
| ATOM | 1931 | HG11 | VAL | 124 | 51.111 | 36.736 | 46.858 | 1.00 | 0.00 | H |
| ATOM | 1932 | HG12 | VAL | 124 | 49.456 | 37.022 | 46.282 | 1.00 | 0.00 | H |
| ATOM | 1933 | HG13 | VAL | 124 | 50.421 | 35.703 | 45.598 | 1.00 | 0.00 | H |
| ATOM | 1934 | CG2  | VAL | 124 | 50.064 | 37.722 | 43.724 | 1.00 | 0.00 | C |
| ATOM | 1935 | HG21 | VAL | 124 | 49.863 | 36.710 | 43.370 | 1.00 | 0.00 | H |
| ATOM | 1936 | HG22 | VAL | 124 | 49.115 | 38.176 | 44.006 | 1.00 | 0.00 | H |
| ATOM | 1937 | HG23 | VAL | 124 | 50.511 | 38.268 | 42.894 | 1.00 | 0.00 | H |
| ATOM | 1938 | C    | VAL | 124 | 51.739 | 39.979 | 44.415 | 1.00 | 0.00 | C |
| ATOM | 1939 | O    | VAL | 124 | 51.141 | 40.740 | 43.675 | 1.00 | 0.00 | O |
| ATOM | 1940 | N    | PHE | 125 | 53.073 | 39.805 | 44.137 | 1.00 | 0.00 | N |
| ATOM | 1941 | H    | PHE | 125 | 53.605 | 39.166 | 44.712 | 1.00 | 0.00 | H |
| ATOM | 1942 | CA   | PHE | 125 | 53.765 | 40.386 | 43.008 | 1.00 | 0.00 | C |
| ATOM | 1943 | HA   | PHE | 125 | 53.091 | 40.386 | 42.150 | 1.00 | 0.00 | H |
| ATOM | 1944 | CB   | PHE | 125 | 54.095 | 41.842 | 43.343 | 1.00 | 0.00 | C |
| ATOM | 1945 | HB2  | PHE | 125 | 54.666 | 42.275 | 42.522 | 1.00 | 0.00 | H |
| ATOM | 1946 | HB3  | PHE | 125 | 53.169 | 42.414 | 43.408 | 1.00 | 0.00 | H |
| ATOM | 1947 | CG   | PHE | 125 | 54.856 | 42.011 | 44.627 | 1.00 | 0.00 | C |
| ATOM | 1948 | CD1  | PHE | 125 | 56.241 | 41.937 | 44.644 | 1.00 | 0.00 | C |

|      |      |     |     |     |        |        |        |      |      |   |
|------|------|-----|-----|-----|--------|--------|--------|------|------|---|
| ATOM | 1949 | HD1 | PHE | 125 | 56.769 | 41.718 | 43.740 | 1.00 | 0.00 | H |
| ATOM | 1950 | CE1 | PHE | 125 | 56.942 | 42.092 | 45.825 | 1.00 | 0.00 | C |
| ATOM | 1951 | HE1 | PHE | 125 | 58.021 | 42.033 | 45.822 | 1.00 | 0.00 | H |
| ATOM | 1952 | CZ  | PHE | 125 | 56.266 | 42.324 | 47.004 | 1.00 | 0.00 | C |
| ATOM | 1953 | HZ  | PHE | 125 | 56.828 | 42.454 | 47.912 | 1.00 | 0.00 | H |
| ATOM | 1954 | CE2 | PHE | 125 | 54.887 | 42.400 | 47.002 | 1.00 | 0.00 | C |
| ATOM | 1955 | HE2 | PHE | 125 | 54.355 | 42.527 | 47.930 | 1.00 | 0.00 | H |
| ATOM | 1956 | CD2 | PHE | 125 | 54.189 | 42.244 | 45.820 | 1.00 | 0.00 | C |
| ATOM | 1957 | HD2 | PHE | 125 | 53.110 | 42.302 | 45.834 | 1.00 | 0.00 | H |
| ATOM | 1958 | C   | PHE | 125 | 55.061 | 39.664 | 42.554 | 1.00 | 0.00 | C |
| ATOM | 1959 | O   | PHE | 125 | 55.608 | 38.862 | 43.300 | 1.00 | 0.00 | O |
| ATOM | 1960 | N   | ALA | 126 | 55.549 | 39.925 | 41.344 | 1.00 | 0.00 | N |
| ATOM | 1961 | H   | ALA | 126 | 55.051 | 40.631 | 40.821 | 1.00 | 0.00 | H |
| ATOM | 1962 | CA  | ALA | 126 | 56.633 | 39.287 | 40.580 | 1.00 | 0.00 | C |
| ATOM | 1963 | HA  | ALA | 126 | 56.744 | 38.277 | 40.976 | 1.00 | 0.00 | H |
| ATOM | 1964 | CB  | ALA | 126 | 56.398 | 39.147 | 39.081 | 1.00 | 0.00 | C |
| ATOM | 1965 | HB1 | ALA | 126 | 57.201 | 38.561 | 38.632 | 1.00 | 0.00 | H |
| ATOM | 1966 | HB2 | ALA | 126 | 55.447 | 38.643 | 38.902 | 1.00 | 0.00 | H |
| ATOM | 1967 | HB3 | ALA | 126 | 56.379 | 40.135 | 38.618 | 1.00 | 0.00 | H |
| ATOM | 1968 | C   | ALA | 126 | 58.000 | 40.010 | 40.817 | 1.00 | 0.00 | C |
| ATOM | 1969 | O   | ALA | 126 | 59.068 | 39.656 | 40.375 | 1.00 | 0.00 | O |
| ATOM | 1970 | N   | HIE | 127 | 57.954 | 41.020 | 41.648 | 1.00 | 0.00 | N |
| ATOM | 1971 | H   | HIE | 127 | 57.069 | 41.270 | 42.060 | 1.00 | 0.00 | H |
| ATOM | 1972 | CA  | HIE | 127 | 59.075 | 41.943 | 41.848 | 1.00 | 0.00 | C |
| ATOM | 1973 | HA  | HIE | 127 | 59.551 | 42.128 | 40.883 | 1.00 | 0.00 | H |
| ATOM | 1974 | CB  | HIE | 127 | 58.602 | 43.293 | 42.396 | 1.00 | 0.00 | C |
| ATOM | 1975 | HB2 | HIE | 127 | 58.227 | 43.227 | 43.413 | 1.00 | 0.00 | H |
| ATOM | 1976 | HB3 | HIE | 127 | 59.449 | 43.982 | 42.405 | 1.00 | 0.00 | H |
| ATOM | 1977 | CG  | HIE | 127 | 57.516 | 43.926 | 41.582 | 1.00 | 0.00 | C |
| ATOM | 1978 | ND1 | HIE | 127 | 57.626 | 44.124 | 40.221 | 1.00 | 0.00 | N |

|      |      |      |     |     |        |        |        |      |      |   |
|------|------|------|-----|-----|--------|--------|--------|------|------|---|
| ATOM | 1979 | CE1  | HIE | 127 | 56.523 | 44.698 | 39.773 | 1.00 | 0.00 | C |
| ATOM | 1980 | HE1  | HIE | 127 | 56.321 | 44.939 | 38.745 | 1.00 | 0.00 | H |
| ATOM | 1981 | NE2  | HIE | 127 | 55.704 | 44.879 | 40.793 | 1.00 | 0.00 | N |
| ATOM | 1982 | HE2  | HIE | 127 | 54.789 | 45.305 | 40.736 | 1.00 | 0.00 | H |
| ATOM | 1983 | CD2  | HIE | 127 | 56.300 | 44.405 | 41.935 | 1.00 | 0.00 | C |
| ATOM | 1984 | HD2  | HIE | 127 | 55.889 | 44.403 | 42.931 | 1.00 | 0.00 | H |
| ATOM | 1985 | C    | HIE | 127 | 60.073 | 41.399 | 42.762 | 1.00 | 0.00 | C |
| ATOM | 1986 | O    | HIE | 127 | 60.090 | 41.901 | 43.893 | 1.00 | 0.00 | O |
| ATOM | 1987 | N    | THR | 128 | 60.936 | 40.519 | 42.271 | 1.00 | 0.00 | N |
| ATOM | 1988 | H    | THR | 128 | 60.806 | 40.222 | 41.312 | 1.00 | 0.00 | H |
| ATOM | 1989 | CA   | THR | 128 | 62.048 | 39.923 | 42.962 | 1.00 | 0.00 | C |
| ATOM | 1990 | HA   | THR | 128 | 61.709 | 39.608 | 43.948 | 1.00 | 0.00 | H |
| ATOM | 1991 | CB   | THR | 128 | 62.546 | 38.682 | 42.199 | 1.00 | 0.00 | C |
| ATOM | 1992 | HB   | THR | 128 | 63.420 | 38.274 | 42.707 | 1.00 | 0.00 | H |
| ATOM | 1993 | CG2  | THR | 128 | 61.464 | 37.614 | 42.152 | 1.00 | 0.00 | C |
| ATOM | 1994 | HG21 | THR | 128 | 61.877 | 36.711 | 41.702 | 1.00 | 0.00 | H |
| ATOM | 1995 | HG22 | THR | 128 | 61.127 | 37.372 | 43.158 | 1.00 | 0.00 | H |
| ATOM | 1996 | HG23 | THR | 128 | 60.616 | 37.941 | 41.553 | 1.00 | 0.00 | H |
| ATOM | 1997 | OG1  | THR | 128 | 62.906 | 39.052 | 40.861 | 1.00 | 0.00 | O |
| ATOM | 1998 | HG1  | THR | 128 | 63.315 | 38.297 | 40.433 | 1.00 | 0.00 | H |
| ATOM | 1999 | C    | THR | 128 | 63.207 | 40.899 | 43.168 | 1.00 | 0.00 | C |
| ATOM | 2000 | O    | THR | 128 | 64.119 | 40.591 | 43.956 | 1.00 | 0.00 | O |
| ATOM | 2001 | N    | GLN | 129 | 63.234 | 42.081 | 42.584 | 1.00 | 0.00 | N |
| ATOM | 2002 | H    | GLN | 129 | 62.453 | 42.332 | 41.995 | 1.00 | 0.00 | H |
| ATOM | 2003 | CA   | GLN | 129 | 64.409 | 42.985 | 42.533 | 1.00 | 0.00 | C |
| ATOM | 2004 | HA   | GLN | 129 | 65.308 | 42.373 | 42.450 | 1.00 | 0.00 | H |
| ATOM | 2005 | CB   | GLN | 129 | 64.319 | 43.870 | 41.287 | 1.00 | 0.00 | C |
| ATOM | 2006 | HB2  | GLN | 129 | 63.418 | 44.483 | 41.353 | 1.00 | 0.00 | H |
| ATOM | 2007 | HB3  | GLN | 129 | 65.181 | 44.539 | 41.257 | 1.00 | 0.00 | H |
| ATOM | 2008 | CG   | GLN | 129 | 64.264 | 43.100 | 39.979 | 1.00 | 0.00 | C |

|      |      |      |     |     |        |        |        |      |      |   |
|------|------|------|-----|-----|--------|--------|--------|------|------|---|
| ATOM | 2009 | HG2  | GLN | 129 | 63.398 | 42.437 | 39.965 | 1.00 | 0.00 | H |
| ATOM | 2010 | HG3  | GLN | 129 | 64.138 | 43.818 | 39.167 | 1.00 | 0.00 | H |
| ATOM | 2011 | CD   | GLN | 129 | 65.528 | 42.302 | 39.723 | 1.00 | 0.00 | C |
| ATOM | 2012 | OE1  | GLN | 129 | 65.414 | 40.980 | 39.781 | 1.00 | 0.00 | O |
| ATOM | 2013 | NE2  | GLN | 129 | 66.597 | 42.867 | 39.476 | 1.00 | 0.00 | N |
| ATOM | 2014 | HE21 | GLN | 129 | 67.423 | 42.305 | 39.339 | 1.00 | 0.00 | H |
| ATOM | 2015 | HE22 | GLN | 129 | 66.635 | 43.872 | 39.405 | 1.00 | 0.00 | H |
| ATOM | 2016 | C    | GLN | 129 | 64.566 | 43.883 | 43.806 | 1.00 | 0.00 | C |
| ATOM | 2017 | O    | GLN | 129 | 64.457 | 45.100 | 43.715 | 1.00 | 0.00 | O |
| ATOM | 2018 | N    | GLN | 130 | 64.880 | 43.262 | 44.933 | 1.00 | 0.00 | N |
| ATOM | 2019 | H    | GLN | 130 | 64.942 | 42.253 | 44.934 | 1.00 | 0.00 | H |
| ATOM | 2020 | CA   | GLN | 130 | 65.273 | 43.962 | 46.155 | 1.00 | 0.00 | C |
| ATOM | 2021 | HA   | GLN | 130 | 65.776 | 44.888 | 45.871 | 1.00 | 0.00 | H |
| ATOM | 2022 | CB   | GLN | 130 | 64.020 | 44.337 | 46.951 | 1.00 | 0.00 | C |
| ATOM | 2023 | HB2  | GLN | 130 | 64.324 | 44.925 | 47.819 | 1.00 | 0.00 | H |
| ATOM | 2024 | HB3  | GLN | 130 | 63.388 | 44.970 | 46.326 | 1.00 | 0.00 | H |
| ATOM | 2025 | CG   | GLN | 130 | 63.204 | 43.146 | 47.424 | 1.00 | 0.00 | C |
| ATOM | 2026 | HG2  | GLN | 130 | 62.977 | 42.501 | 46.574 | 1.00 | 0.00 | H |
| ATOM | 2027 | HG3  | GLN | 130 | 63.776 | 42.562 | 48.146 | 1.00 | 0.00 | H |
| ATOM | 2028 | CD   | GLN | 130 | 61.896 | 43.561 | 48.070 | 1.00 | 0.00 | C |
| ATOM | 2029 | OE1  | GLN | 130 | 61.775 | 44.667 | 48.604 | 1.00 | 0.00 | O |
| ATOM | 2030 | NE2  | GLN | 130 | 60.908 | 42.674 | 48.026 | 1.00 | 0.00 | N |
| ATOM | 2031 | HE21 | GLN | 130 | 61.056 | 41.774 | 47.592 | 1.00 | 0.00 | H |
| ATOM | 2032 | HE22 | GLN | 130 | 60.009 | 42.917 | 48.408 | 1.00 | 0.00 | H |
| ATOM | 2033 | C    | GLN | 130 | 66.246 | 43.141 | 47.053 | 1.00 | 0.00 | C |
| ATOM | 2034 | O    | GLN | 130 | 66.357 | 41.963 | 47.015 | 1.00 | 0.00 | O |
| ATOM | 2035 | N    | SER | 131 | 67.114 | 43.904 | 47.681 | 1.00 | 0.00 | N |
| ATOM | 2036 | H    | SER | 131 | 67.024 | 44.904 | 47.578 | 1.00 | 0.00 | H |
| ATOM | 2037 | CA   | SER | 131 | 68.238 | 43.420 | 48.543 | 1.00 | 0.00 | C |
| ATOM | 2038 | HA   | SER | 131 | 68.401 | 42.363 | 48.327 | 1.00 | 0.00 | H |

|      |      |      |     |     |        |        |        |      |      |   |
|------|------|------|-----|-----|--------|--------|--------|------|------|---|
| ATOM | 2039 | CB   | SER | 131 | 69.507 | 44.147 | 48.141 | 1.00 | 0.00 | C |
| ATOM | 2040 | HB2  | SER | 131 | 70.351 | 43.760 | 48.714 | 1.00 | 0.00 | H |
| ATOM | 2041 | HB3  | SER | 131 | 69.699 | 43.973 | 47.082 | 1.00 | 0.00 | H |
| ATOM | 2042 | OG   | SER | 131 | 69.387 | 45.526 | 48.363 | 1.00 | 0.00 | O |
| ATOM | 2043 | HG   | SER | 131 | 70.189 | 45.954 | 48.053 | 1.00 | 0.00 | H |
| ATOM | 2044 | C    | SER | 131 | 68.123 | 43.538 | 50.046 | 1.00 | 0.00 | C |
| ATOM | 2045 | O    | SER | 131 | 68.790 | 42.761 | 50.790 | 1.00 | 0.00 | O |
| ATOM | 2046 | N    | ARG | 132 | 67.142 | 44.278 | 50.521 | 1.00 | 0.00 | N |
| ATOM | 2047 | H    | ARG | 132 | 66.559 | 44.799 | 49.883 | 1.00 | 0.00 | H |
| ATOM | 2048 | CA   | ARG | 132 | 67.007 | 44.533 | 51.956 | 1.00 | 0.00 | C |
| ATOM | 2049 | HA   | ARG | 132 | 67.989 | 44.433 | 52.423 | 1.00 | 0.00 | H |
| ATOM | 2050 | CB   | ARG | 132 | 66.550 | 45.968 | 52.170 | 1.00 | 0.00 | C |
| ATOM | 2051 | HB2  | ARG | 132 | 65.644 | 46.120 | 51.584 | 1.00 | 0.00 | H |
| ATOM | 2052 | HB3  | ARG | 132 | 66.306 | 46.121 | 53.222 | 1.00 | 0.00 | H |
| ATOM | 2053 | CG   | ARG | 132 | 67.566 | 47.029 | 51.777 | 1.00 | 0.00 | C |
| ATOM | 2054 | HG2  | ARG | 132 | 68.465 | 46.917 | 52.385 | 1.00 | 0.00 | H |
| ATOM | 2055 | HG3  | ARG | 132 | 67.840 | 46.898 | 50.730 | 1.00 | 0.00 | H |
| ATOM | 2056 | CD   | ARG | 132 | 67.021 | 48.400 | 51.943 | 1.00 | 0.00 | C |
| ATOM | 2057 | HD2  | ARG | 132 | 67.755 | 49.114 | 51.567 | 1.00 | 0.00 | H |
| ATOM | 2058 | HD3  | ARG | 132 | 66.111 | 48.495 | 51.349 | 1.00 | 0.00 | H |
| ATOM | 2059 | NE   | ARG | 132 | 66.740 | 48.708 | 53.336 | 1.00 | 0.00 | N |
| ATOM | 2060 | HE   | ARG | 132 | 67.085 | 48.063 | 54.031 | 1.00 | 0.00 | H |
| ATOM | 2061 | CZ   | ARG | 132 | 66.054 | 49.787 | 53.758 | 1.00 | 0.00 | C |
| ATOM | 2062 | NH1  | ARG | 132 | 65.585 | 50.651 | 52.885 | 1.00 | 0.00 | N |
| ATOM | 2063 | HH11 | ARG | 132 | 65.772 | 50.526 | 51.902 | 1.00 | 0.00 | H |
| ATOM | 2064 | HH12 | ARG | 132 | 65.037 | 51.439 | 53.195 | 1.00 | 0.00 | H |
| ATOM | 2065 | NH2  | ARG | 132 | 65.851 | 49.978 | 55.050 | 1.00 | 0.00 | N |
| ATOM | 2066 | HH21 | ARG | 132 | 65.364 | 50.802 | 55.370 | 1.00 | 0.00 | H |
| ATOM | 2067 | HH22 | ARG | 132 | 66.170 | 49.294 | 55.720 | 1.00 | 0.00 | H |
| ATOM | 2068 | C    | ARG | 132 | 66.084 | 43.657 | 52.739 | 1.00 | 0.00 | C |



|      |      |      |     |     |        |        |        |      |      |   |
|------|------|------|-----|-----|--------|--------|--------|------|------|---|
| ATOM | 2069 | O    | ARG | 132 | 65.917 | 43.822 | 54.002 | 1.00 | 0.00 | O |
| ATOM | 2070 | N    | GLN | 133 | 65.539 | 42.655 | 52.089 | 1.00 | 0.00 | N |
| ATOM | 2071 | H    | GLN | 133 | 65.794 | 42.578 | 51.114 | 1.00 | 0.00 | H |
| ATOM | 2072 | CA   | GLN | 133 | 64.588 | 41.593 | 52.537 | 1.00 | 0.00 | C |
| ATOM | 2073 | HA   | GLN | 133 | 64.972 | 41.181 | 53.470 | 1.00 | 0.00 | H |
| ATOM | 2074 | CB   | GLN | 133 | 63.186 | 42.160 | 52.776 | 1.00 | 0.00 | C |
| ATOM | 2075 | HB2  | GLN | 133 | 62.597 | 41.449 | 53.347 | 1.00 | 0.00 | H |
| ATOM | 2076 | HB3  | GLN | 133 | 63.259 | 43.053 | 53.399 | 1.00 | 0.00 | H |
| ATOM | 2077 | CG   | GLN | 133 | 62.433 | 42.514 | 51.505 | 1.00 | 0.00 | C |
| ATOM | 2078 | HG2  | GLN | 133 | 62.742 | 43.506 | 51.179 | 1.00 | 0.00 | H |
| ATOM | 2079 | HG3  | GLN | 133 | 62.664 | 41.839 | 50.687 | 1.00 | 0.00 | H |
| ATOM | 2080 | CD   | GLN | 133 | 60.929 | 42.498 | 51.700 | 1.00 | 0.00 | C |
| ATOM | 2081 | OE1  | GLN | 133 | 60.356 | 43.414 | 52.297 | 1.00 | 0.00 | O |
| ATOM | 2082 | NE2  | GLN | 133 | 60.279 | 41.454 | 51.198 | 1.00 | 0.00 | N |
| ATOM | 2083 | HE21 | GLN | 133 | 60.790 | 40.736 | 50.701 | 1.00 | 0.00 | H |
| ATOM | 2084 | HE22 | GLN | 133 | 59.282 | 41.380 | 51.320 | 1.00 | 0.00 | H |
| ATOM | 2085 | C    | GLN | 133 | 64.569 | 40.485 | 51.417 | 1.00 | 0.00 | C |
| ATOM | 2086 | O    | GLN | 133 | 65.128 | 40.743 | 50.312 | 1.00 | 0.00 | O |
| ATOM | 2087 | N    | PRO | 134 | 64.036 | 39.312 | 51.698 | 1.00 | 0.00 | N |
| ATOM | 2088 | CD   | PRO | 134 | 63.477 | 38.995 | 53.034 | 1.00 | 0.00 | C |
| ATOM | 2089 | HD2  | PRO | 134 | 62.463 | 39.383 | 53.121 | 1.00 | 0.00 | H |
| ATOM | 2090 | HD3  | PRO | 134 | 64.111 | 39.320 | 53.858 | 1.00 | 0.00 | H |
| ATOM | 2091 | CG   | PRO | 134 | 63.413 | 37.491 | 53.000 | 1.00 | 0.00 | C |
| ATOM | 2092 | HG2  | PRO | 134 | 62.648 | 37.102 | 53.651 | 1.00 | 0.00 | H |
| ATOM | 2093 | HG3  | PRO | 134 | 64.387 | 37.074 | 53.262 | 1.00 | 0.00 | H |
| ATOM | 2094 | CB   | PRO | 134 | 63.088 | 37.167 | 51.581 | 1.00 | 0.00 | C |
| ATOM | 2095 | HB2  | PRO | 134 | 62.019 | 37.312 | 51.413 | 1.00 | 0.00 | H |
| ATOM | 2096 | HB3  | PRO | 134 | 63.375 | 36.146 | 51.333 | 1.00 | 0.00 | H |
| ATOM | 2097 | CA   | PRO | 134 | 63.896 | 38.184 | 50.769 | 1.00 | 0.00 | C |
| ATOM | 2098 | HA   | PRO | 134 | 64.879 | 37.784 | 50.518 | 1.00 | 0.00 | H |

|      |      |      |     |     |        |        |        |      |      |   |
|------|------|------|-----|-----|--------|--------|--------|------|------|---|
| ATOM | 2099 | C    | PRO | 134 | 63.135 | 38.656 | 49.483 | 1.00 | 0.00 | C |
| ATOM | 2100 | O    | PRO | 134 | 62.273 | 39.508 | 49.623 | 1.00 | 0.00 | O |
| ATOM | 2101 | N    | HID | 135 | 63.410 | 38.167 | 48.299 | 1.00 | 0.00 | N |
| ATOM | 2102 | H    | HID | 135 | 64.126 | 37.456 | 48.264 | 1.00 | 0.00 | H |
| ATOM | 2103 | CA   | HID | 135 | 62.859 | 38.551 | 46.983 | 1.00 | 0.00 | C |
| ATOM | 2104 | HA   | HID | 135 | 63.514 | 39.317 | 46.564 | 1.00 | 0.00 | H |
| ATOM | 2105 | CB   | HID | 135 | 62.876 | 37.343 | 46.042 | 1.00 | 0.00 | C |
| ATOM | 2106 | HB2  | HID | 135 | 62.358 | 36.503 | 46.507 | 1.00 | 0.00 | H |
| ATOM | 2107 | HB3  | HID | 135 | 62.339 | 37.601 | 45.130 | 1.00 | 0.00 | H |
| ATOM | 2108 | CG   | HID | 135 | 64.253 | 36.911 | 45.643 | 1.00 | 0.00 | C |
| ATOM | 2109 | ND1  | HID | 135 | 65.120 | 37.734 | 44.954 | 1.00 | 0.00 | N |
| ATOM | 2110 | HD1  | HID | 135 | 64.920 | 38.679 | 44.655 | 1.00 | 0.00 | H |
| ATOM | 2111 | CE1  | HID | 135 | 66.255 | 37.090 | 44.740 | 1.00 | 0.00 | C |
| ATOM | 2112 | HE1  | HID | 135 | 67.118 | 37.483 | 44.221 | 1.00 | 0.00 | H |
| ATOM | 2113 | NE2  | HID | 135 | 66.154 | 35.883 | 45.264 | 1.00 | 0.00 | N |
| ATOM | 2114 | CD2  | HID | 135 | 64.913 | 35.745 | 45.835 | 1.00 | 0.00 | C |
| ATOM | 2115 | HD2  | HID | 135 | 64.533 | 34.869 | 46.341 | 1.00 | 0.00 | H |
| ATOM | 2116 | C    | HID | 135 | 61.460 | 39.118 | 46.981 | 1.00 | 0.00 | C |
| ATOM | 2117 | O    | HID | 135 | 61.241 | 40.239 | 46.656 | 1.00 | 0.00 | O |
| ATOM | 2118 | N    | LEU | 136 | 60.447 | 38.423 | 47.518 | 1.00 | 0.00 | N |
| ATOM | 2119 | H    | LEU | 136 | 60.642 | 37.516 | 47.919 | 1.00 | 0.00 | H |
| ATOM | 2120 | CA   | LEU | 136 | 58.992 | 38.819 | 47.376 | 1.00 | 0.00 | C |
| ATOM | 2121 | HA   | LEU | 136 | 58.909 | 39.760 | 46.833 | 1.00 | 0.00 | H |
| ATOM | 2122 | CB   | LEU | 136 | 58.209 | 37.750 | 46.603 | 1.00 | 0.00 | C |
| ATOM | 2123 | HB2  | LEU | 136 | 58.226 | 36.834 | 47.192 | 1.00 | 0.00 | H |
| ATOM | 2124 | HB3  | LEU | 136 | 57.168 | 38.068 | 46.524 | 1.00 | 0.00 | H |
| ATOM | 2125 | CG   | LEU | 136 | 58.731 | 37.429 | 45.196 | 1.00 | 0.00 | C |
| ATOM | 2126 | HG   | LEU | 136 | 59.759 | 37.073 | 45.256 | 1.00 | 0.00 | H |
| ATOM | 2127 | CD1  | LEU | 136 | 57.887 | 36.321 | 44.581 | 1.00 | 0.00 | C |
| ATOM | 2128 | HD11 | LEU | 136 | 58.266 | 36.081 | 43.587 | 1.00 | 0.00 | H |

|      |      |      |     |     |        |        |        |      |      |   |
|------|------|------|-----|-----|--------|--------|--------|------|------|---|
| ATOM | 2129 | HD12 | LEU | 136 | 57.940 | 35.425 | 45.200 | 1.00 | 0.00 | H |
| ATOM | 2130 | HD13 | LEU | 136 | 56.847 | 36.640 | 44.498 | 1.00 | 0.00 | H |
| ATOM | 2131 | CD2  | LEU | 136 | 58.690 | 38.687 | 44.341 | 1.00 | 0.00 | C |
| ATOM | 2132 | HD21 | LEU | 136 | 58.821 | 38.437 | 43.289 | 1.00 | 0.00 | H |
| ATOM | 2133 | HD22 | LEU | 136 | 57.746 | 39.209 | 44.473 | 1.00 | 0.00 | H |
| ATOM | 2134 | HD23 | LEU | 136 | 59.493 | 39.354 | 44.645 | 1.00 | 0.00 | H |
| ATOM | 2135 | C    | LEU | 136 | 58.336 | 39.028 | 48.752 | 1.00 | 0.00 | C |
| ATOM | 2136 | O    | LEU | 136 | 58.711 | 38.464 | 49.791 | 1.00 | 0.00 | O |
| ATOM | 2137 | N    | MET | 137 | 57.154 | 39.765 | 48.735 | 1.00 | 0.00 | N |
| ATOM | 2138 | H    | MET | 137 | 56.799 | 40.170 | 47.880 | 1.00 | 0.00 | H |
| ATOM | 2139 | CA   | MET | 137 | 56.385 | 39.899 | 49.982 | 1.00 | 0.00 | C |
| ATOM | 2140 | HA   | MET | 137 | 56.769 | 39.215 | 50.723 | 1.00 | 0.00 | H |
| ATOM | 2141 | CB   | MET | 137 | 56.514 | 41.309 | 50.555 | 1.00 | 0.00 | C |
| ATOM | 2142 | HB2  | MET | 137 | 57.575 | 41.523 | 50.675 | 1.00 | 0.00 | H |
| ATOM | 2143 | HB3  | MET | 137 | 56.109 | 42.031 | 49.856 | 1.00 | 0.00 | H |
| ATOM | 2144 | CG   | MET | 137 | 55.854 | 41.499 | 51.913 | 1.00 | 0.00 | C |
| ATOM | 2145 | HG2  | MET | 137 | 55.996 | 40.602 | 52.516 | 1.00 | 0.00 | H |
| ATOM | 2146 | HG3  | MET | 137 | 56.335 | 42.333 | 52.424 | 1.00 | 0.00 | H |
| ATOM | 2147 | SD   | MET | 137 | 54.092 | 41.863 | 51.785 | 1.00 | 0.00 | S |
| ATOM | 2148 | CE   | MET | 137 | 54.137 | 43.528 | 51.128 | 1.00 | 0.00 | C |
| ATOM | 2149 | HE1  | MET | 137 | 53.121 | 43.901 | 51.010 | 1.00 | 0.00 | H |
| ATOM | 2150 | HE2  | MET | 137 | 54.678 | 44.178 | 51.816 | 1.00 | 0.00 | H |
| ATOM | 2151 | HE3  | MET | 137 | 54.630 | 43.533 | 50.161 | 1.00 | 0.00 | H |
| ATOM | 2152 | C    | MET | 137 | 54.917 | 39.553 | 49.693 | 1.00 | 0.00 | C |
| ATOM | 2153 | O    | MET | 137 | 54.329 | 40.005 | 48.732 | 1.00 | 0.00 | O |
| ATOM | 2154 | N    | VAL | 138 | 54.219 | 38.829 | 50.553 | 1.00 | 0.00 | N |
| ATOM | 2155 | H    | VAL | 138 | 54.670 | 38.515 | 51.396 | 1.00 | 0.00 | H |
| ATOM | 2156 | CA   | VAL | 138 | 52.782 | 38.488 | 50.402 | 1.00 | 0.00 | C |
| ATOM | 2157 | HA   | VAL | 138 | 52.390 | 38.938 | 49.495 | 1.00 | 0.00 | H |
| ATOM | 2158 | CB   | VAL | 138 | 52.534 | 36.969 | 50.331 | 1.00 | 0.00 | C |

|      |      |      |     |     |        |        |        |      |      |   |
|------|------|------|-----|-----|--------|--------|--------|------|------|---|
| ATOM | 2159 | HB   | VAL | 138 | 52.920 | 36.496 | 51.235 | 1.00 | 0.00 | H |
| ATOM | 2160 | CG1  | VAL | 138 | 51.045 | 36.677 | 50.232 | 1.00 | 0.00 | C |
| ATOM | 2161 | HG11 | VAL | 138 | 50.898 | 35.606 | 50.092 | 1.00 | 0.00 | H |
| ATOM | 2162 | HG12 | VAL | 138 | 50.525 | 36.966 | 51.144 | 1.00 | 0.00 | H |
| ATOM | 2163 | HG13 | VAL | 138 | 50.611 | 37.201 | 49.381 | 1.00 | 0.00 | H |
| ATOM | 2164 | CG2  | VAL | 138 | 53.280 | 36.378 | 49.144 | 1.00 | 0.00 | C |
| ATOM | 2165 | HG21 | VAL | 138 | 53.094 | 35.305 | 49.086 | 1.00 | 0.00 | H |
| ATOM | 2166 | HG22 | VAL | 138 | 52.945 | 36.851 | 48.222 | 1.00 | 0.00 | H |
| ATOM | 2167 | HG23 | VAL | 138 | 54.349 | 36.543 | 49.248 | 1.00 | 0.00 | H |
| ATOM | 2168 | C    | VAL | 138 | 52.092 | 39.023 | 51.558 | 1.00 | 0.00 | C |
| ATOM | 2169 | O    | VAL | 138 | 52.360 | 38.657 | 52.678 | 1.00 | 0.00 | O |
| ATOM | 2170 | N    | VAL | 139 | 51.044 | 39.791 | 51.276 | 1.00 | 0.00 | N |
| ATOM | 2171 | H    | VAL | 139 | 50.809 | 40.019 | 50.319 | 1.00 | 0.00 | H |
| ATOM | 2172 | CA   | VAL | 139 | 50.200 | 40.272 | 52.381 | 1.00 | 0.00 | C |
| ATOM | 2173 | HA   | VAL | 139 | 50.814 | 40.445 | 53.267 | 1.00 | 0.00 | H |
| ATOM | 2174 | CB   | VAL | 139 | 49.548 | 41.613 | 51.997 | 1.00 | 0.00 | C |
| ATOM | 2175 | HB   | VAL | 139 | 48.915 | 41.454 | 51.131 | 1.00 | 0.00 | H |
| ATOM | 2176 | CG1  | VAL | 139 | 48.659 | 42.115 | 53.125 | 1.00 | 0.00 | C |
| ATOM | 2177 | HG11 | VAL | 139 | 48.208 | 43.062 | 52.848 | 1.00 | 0.00 | H |
| ATOM | 2178 | HG12 | VAL | 139 | 47.850 | 41.414 | 53.305 | 1.00 | 0.00 | H |
| ATOM | 2179 | HG13 | VAL | 139 | 49.242 | 42.242 | 54.038 | 1.00 | 0.00 | H |
| ATOM | 2180 | CG2  | VAL | 139 | 50.623 | 42.636 | 51.662 | 1.00 | 0.00 | C |
| ATOM | 2181 | HG21 | VAL | 139 | 50.168 | 43.591 | 51.416 | 1.00 | 0.00 | H |
| ATOM | 2182 | HG22 | VAL | 139 | 51.289 | 42.762 | 52.513 | 1.00 | 0.00 | H |
| ATOM | 2183 | HG23 | VAL | 139 | 51.198 | 42.317 | 50.793 | 1.00 | 0.00 | H |
| ATOM | 2184 | C    | VAL | 139 | 49.089 | 39.214 | 52.733 | 1.00 | 0.00 | C |
| ATOM | 2185 | O    | VAL | 139 | 48.266 | 38.830 | 51.888 | 1.00 | 0.00 | O |
| ATOM | 2186 | N    | VAL | 140 | 49.120 | 38.678 | 53.916 | 1.00 | 0.00 | N |
| ATOM | 2187 | H    | VAL | 140 | 49.824 | 39.012 | 54.551 | 1.00 | 0.00 | H |
| ATOM | 2188 | CA   | VAL | 140 | 48.265 | 37.582 | 54.399 | 1.00 | 0.00 | C |

|      |      |      |     |     |        |        |        |      |      |   |
|------|------|------|-----|-----|--------|--------|--------|------|------|---|
| ATOM | 2189 | HA   | VAL | 140 | 47.799 | 37.081 | 53.550 | 1.00 | 0.00 | H |
| ATOM | 2190 | CB   | VAL | 140 | 49.135 | 36.546 | 55.136 | 1.00 | 0.00 | C |
| ATOM | 2191 | HB   | VAL | 140 | 49.602 | 37.011 | 55.994 | 1.00 | 0.00 | H |
| ATOM | 2192 | CG1  | VAL | 140 | 48.280 | 35.390 | 55.633 | 1.00 | 0.00 | C |
| ATOM | 2193 | HG11 | VAL | 140 | 48.923 | 34.684 | 56.154 | 1.00 | 0.00 | H |
| ATOM | 2194 | HG12 | VAL | 140 | 47.525 | 35.730 | 56.341 | 1.00 | 0.00 | H |
| ATOM | 2195 | HG13 | VAL | 140 | 47.793 | 34.885 | 54.797 | 1.00 | 0.00 | H |
| ATOM | 2196 | CG2  | VAL | 140 | 50.237 | 36.046 | 54.215 | 1.00 | 0.00 | C |
| ATOM | 2197 | HG21 | VAL | 140 | 50.786 | 35.252 | 54.719 | 1.00 | 0.00 | H |
| ATOM | 2198 | HG22 | VAL | 140 | 49.821 | 35.641 | 53.298 | 1.00 | 0.00 | H |
| ATOM | 2199 | HG23 | VAL | 140 | 50.942 | 36.841 | 53.980 | 1.00 | 0.00 | H |
| ATOM | 2200 | C    | VAL | 140 | 47.112 | 38.095 | 55.359 | 1.00 | 0.00 | C |
| ATOM | 2201 | O    | VAL | 140 | 47.304 | 38.548 | 56.440 | 1.00 | 0.00 | O |
| ATOM | 2202 | N    | VAL | 141 | 45.858 | 38.079 | 54.906 | 1.00 | 0.00 | N |
| ATOM | 2203 | H    | VAL | 141 | 45.698 | 37.692 | 53.985 | 1.00 | 0.00 | H |
| ATOM | 2204 | CA   | VAL | 141 | 44.684 | 38.603 | 55.592 | 1.00 | 0.00 | C |
| ATOM | 2205 | HA   | VAL | 141 | 44.957 | 38.868 | 56.614 | 1.00 | 0.00 | H |
| ATOM | 2206 | CB   | VAL | 141 | 44.224 | 39.893 | 54.886 | 1.00 | 0.00 | C |
| ATOM | 2207 | HB   | VAL | 141 | 44.105 | 39.705 | 53.823 | 1.00 | 0.00 | H |
| ATOM | 2208 | CG1  | VAL | 141 | 42.880 | 40.348 | 55.433 | 1.00 | 0.00 | C |
| ATOM | 2209 | HG11 | VAL | 141 | 42.603 | 41.285 | 54.957 | 1.00 | 0.00 | H |
| ATOM | 2210 | HG12 | VAL | 141 | 42.084 | 39.650 | 55.174 | 1.00 | 0.00 | H |
| ATOM | 2211 | HG13 | VAL | 141 | 42.929 | 40.479 | 56.515 | 1.00 | 0.00 | H |
| ATOM | 2212 | CG2  | VAL | 141 | 45.273 | 40.980 | 55.059 | 1.00 | 0.00 | C |
| ATOM | 2213 | HG21 | VAL | 141 | 44.889 | 41.939 | 54.738 | 1.00 | 0.00 | H |
| ATOM | 2214 | HG22 | VAL | 141 | 45.545 | 41.060 | 56.110 | 1.00 | 0.00 | H |
| ATOM | 2215 | HG23 | VAL | 141 | 46.156 | 40.736 | 54.476 | 1.00 | 0.00 | H |
| ATOM | 2216 | C    | VAL | 141 | 43.496 | 37.676 | 55.687 | 1.00 | 0.00 | C |
| ATOM | 2217 | O    | VAL | 141 | 43.148 | 36.927 | 54.742 | 1.00 | 0.00 | O |
| ATOM | 2218 | N    | GLN | 142 | 42.899 | 37.568 | 56.882 | 1.00 | 0.00 | N |

|      |      |      |     |     |        |        |        |      |      |   |
|------|------|------|-----|-----|--------|--------|--------|------|------|---|
| ATOM | 2219 | H    | GLN | 142 | 43.214 | 38.155 | 57.640 | 1.00 | 0.00 | H |
| ATOM | 2220 | CA   | GLN | 142 | 41.808 | 36.666 | 57.156 | 1.00 | 0.00 | C |
| ATOM | 2221 | HA   | GLN | 142 | 41.844 | 35.820 | 56.468 | 1.00 | 0.00 | H |
| ATOM | 2222 | CB   | GLN | 142 | 41.917 | 36.115 | 58.580 | 1.00 | 0.00 | C |
| ATOM | 2223 | HB2  | GLN | 142 | 41.806 | 36.942 | 59.280 | 1.00 | 0.00 | H |
| ATOM | 2224 | HB3  | GLN | 142 | 41.104 | 35.412 | 58.753 | 1.00 | 0.00 | H |
| ATOM | 2225 | CG   | GLN | 142 | 43.247 | 35.450 | 58.890 | 1.00 | 0.00 | C |
| ATOM | 2226 | HG2  | GLN | 142 | 44.032 | 36.207 | 58.915 | 1.00 | 0.00 | H |
| ATOM | 2227 | HG3  | GLN | 142 | 43.192 | 35.000 | 59.879 | 1.00 | 0.00 | H |
| ATOM | 2228 | CD   | GLN | 142 | 43.601 | 34.368 | 57.888 | 1.00 | 0.00 | C |
| ATOM | 2229 | OE1  | GLN | 142 | 42.830 | 33.429 | 57.669 | 1.00 | 0.00 | O |
| ATOM | 2230 | NE2  | GLN | 142 | 44.772 | 34.492 | 57.274 | 1.00 | 0.00 | N |
| ATOM | 2231 | HE21 | GLN | 142 | 45.383 | 35.267 | 57.471 | 1.00 | 0.00 | H |
| ATOM | 2232 | HE22 | GLN | 142 | 45.047 | 33.784 | 56.602 | 1.00 | 0.00 | H |
| ATOM | 2233 | C    | GLN | 142 | 40.462 | 37.389 | 56.952 | 1.00 | 0.00 | C |
| ATOM | 2234 | O    | GLN | 142 | 40.389 | 38.590 | 57.254 | 1.00 | 0.00 | O |
| ATOM | 2235 | N    | LEU | 143 | 39.411 | 36.715 | 56.561 | 1.00 | 0.00 | N |
| ATOM | 2236 | H    | LEU | 143 | 39.496 | 35.724 | 56.398 | 1.00 | 0.00 | H |
| ATOM | 2237 | CA   | LEU | 143 | 38.077 | 37.287 | 56.543 | 1.00 | 0.00 | C |
| ATOM | 2238 | HA   | LEU | 143 | 38.086 | 38.333 | 56.849 | 1.00 | 0.00 | H |
| ATOM | 2239 | CB   | LEU | 143 | 37.456 | 37.199 | 55.144 | 1.00 | 0.00 | C |
| ATOM | 2240 | HB2  | LEU | 143 | 37.282 | 36.147 | 54.937 | 1.00 | 0.00 | H |
| ATOM | 2241 | HB3  | LEU | 143 | 36.486 | 37.698 | 55.165 | 1.00 | 0.00 | H |
| ATOM | 2242 | CG   | LEU | 143 | 38.303 | 37.776 | 54.002 | 1.00 | 0.00 | C |
| ATOM | 2243 | HG   | LEU | 143 | 39.267 | 37.268 | 53.960 | 1.00 | 0.00 | H |
| ATOM | 2244 | CD1  | LEU | 143 | 37.595 | 37.541 | 52.675 | 1.00 | 0.00 | C |
| ATOM | 2245 | HD11 | LEU | 143 | 38.214 | 37.915 | 51.861 | 1.00 | 0.00 | H |
| ATOM | 2246 | HD12 | LEU | 143 | 37.434 | 36.475 | 52.522 | 1.00 | 0.00 | H |
| ATOM | 2247 | HD13 | LEU | 143 | 36.638 | 38.060 | 52.659 | 1.00 | 0.00 | H |
| ATOM | 2248 | CD2  | LEU | 143 | 38.536 | 39.260 | 54.243 | 1.00 | 0.00 | C |

|      |      |      |     |     |        |        |        |      |      |   |
|------|------|------|-----|-----|--------|--------|--------|------|------|---|
| ATOM | 2249 | HD21 | LEU | 143 | 39.019 | 39.700 | 53.375 | 1.00 | 0.00 | H |
| ATOM | 2250 | HD22 | LEU | 143 | 37.584 | 39.765 | 54.403 | 1.00 | 0.00 | H |
| ATOM | 2251 | HD23 | LEU | 143 | 39.189 | 39.406 | 55.100 | 1.00 | 0.00 | H |
| ATOM | 2252 | C    | LEU | 143 | 37.248 | 36.486 | 57.583 | 1.00 | 0.00 | C |
| ATOM | 2253 | O    | LEU | 143 | 37.440 | 35.241 | 57.654 | 1.00 | 0.00 | O |
| ATOM | 2254 | N    | VAL | 144 | 36.373 | 37.197 | 58.326 | 1.00 | 0.00 | N |
| ATOM | 2255 | H    | VAL | 144 | 36.307 | 38.196 | 58.185 | 1.00 | 0.00 | H |
| ATOM | 2256 | CA   | VAL | 144 | 35.448 | 36.600 | 59.236 | 1.00 | 0.00 | C |
| ATOM | 2257 | HA   | VAL | 144 | 35.562 | 35.516 | 59.212 | 1.00 | 0.00 | H |
| ATOM | 2258 | CB   | VAL | 144 | 35.765 | 37.077 | 60.665 | 1.00 | 0.00 | C |
| ATOM | 2259 | HB   | VAL | 144 | 36.793 | 36.802 | 60.902 | 1.00 | 0.00 | H |
| ATOM | 2260 | CG1  | VAL | 144 | 35.618 | 38.588 | 60.768 | 1.00 | 0.00 | C |
| ATOM | 2261 | HG11 | VAL | 144 | 35.863 | 38.889 | 61.786 | 1.00 | 0.00 | H |
| ATOM | 2262 | HG12 | VAL | 144 | 36.313 | 39.097 | 60.113 | 1.00 | 0.00 | H |
| ATOM | 2263 | HG13 | VAL | 144 | 34.599 | 38.920 | 60.581 | 1.00 | 0.00 | H |
| ATOM | 2264 | CG2  | VAL | 144 | 34.851 | 36.378 | 61.659 | 1.00 | 0.00 | C |
| ATOM | 2265 | HG21 | VAL | 144 | 35.175 | 36.613 | 62.673 | 1.00 | 0.00 | H |
| ATOM | 2266 | HG22 | VAL | 144 | 33.819 | 36.708 | 61.545 | 1.00 | 0.00 | H |
| ATOM | 2267 | HG23 | VAL | 144 | 34.904 | 35.297 | 61.521 | 1.00 | 0.00 | H |
| ATOM | 2268 | C    | VAL | 144 | 33.976 | 36.940 | 58.875 | 1.00 | 0.00 | C |
| ATOM | 2269 | O    | VAL | 144 | 33.655 | 38.120 | 58.493 | 1.00 | 0.00 | O |
| ATOM | 2270 | N    | ALA | 145 | 33.068 | 35.963 | 58.925 | 1.00 | 0.00 | N |
| ATOM | 2271 | H    | ALA | 145 | 33.399 | 35.059 | 59.226 | 1.00 | 0.00 | H |
| ATOM | 2272 | CA   | ALA | 145 | 31.615 | 36.042 | 58.685 | 1.00 | 0.00 | C |
| ATOM | 2273 | HA   | ALA | 145 | 31.452 | 36.465 | 57.695 | 1.00 | 0.00 | H |
| ATOM | 2274 | CB   | ALA | 145 | 31.080 | 34.617 | 58.685 | 1.00 | 0.00 | C |
| ATOM | 2275 | HB1  | ALA | 145 | 30.006 | 34.623 | 58.520 | 1.00 | 0.00 | H |
| ATOM | 2276 | HB2  | ALA | 145 | 31.562 | 34.040 | 57.895 | 1.00 | 0.00 | H |
| ATOM | 2277 | HB3  | ALA | 145 | 31.284 | 34.145 | 59.647 | 1.00 | 0.00 | H |
| ATOM | 2278 | C    | ALA | 145 | 30.917 | 36.954 | 59.687 | 1.00 | 0.00 | C |

|      |      |     |     |     |        |        |        |      |      |   |
|------|------|-----|-----|-----|--------|--------|--------|------|------|---|
| ATOM | 2279 | O   | ALA | 145 | 31.151 | 36.747 | 60.873 | 1.00 | 0.00 | O |
| ATOM | 2280 | N   | SER | 146 | 29.939 | 37.852 | 59.320 | 1.00 | 0.00 | N |
| ATOM | 2281 | H   | SER | 146 | 29.741 | 37.991 | 58.340 | 1.00 | 0.00 | H |
| ATOM | 2282 | CA  | SER | 146 | 29.172 | 38.661 | 60.312 | 1.00 | 0.00 | C |
| ATOM | 2283 | HA  | SER | 146 | 29.020 | 38.062 | 61.211 | 1.00 | 0.00 | H |
| ATOM | 2284 | CB  | SER | 146 | 29.963 | 39.898 | 60.691 | 1.00 | 0.00 | C |
| ATOM | 2285 | HB2 | SER | 146 | 30.994 | 39.619 | 60.911 | 1.00 | 0.00 | H |
| ATOM | 2286 | HB3 | SER | 146 | 29.960 | 40.601 | 59.857 | 1.00 | 0.00 | H |
| ATOM | 2287 | OG  | SER | 146 | 29.419 | 40.513 | 61.827 | 1.00 | 0.00 | O |
| ATOM | 2288 | HG  | SER | 146 | 29.624 | 39.971 | 62.594 | 1.00 | 0.00 | H |
| ATOM | 2289 | C   | SER | 146 | 27.783 | 39.084 | 59.788 | 1.00 | 0.00 | C |
| ATOM | 2290 | O   | SER | 146 | 27.290 | 38.678 | 58.731 | 1.00 | 0.00 | O |
| ATOM | 2291 | N   | ASP | 147 | 27.192 | 39.982 | 60.510 | 1.00 | 0.00 | N |
| ATOM | 2292 | H   | ASP | 147 | 27.622 | 40.336 | 61.353 | 1.00 | 0.00 | H |
| ATOM | 2293 | CA  | ASP | 147 | 25.845 | 40.515 | 60.133 | 1.00 | 0.00 | C |
| ATOM | 2294 | HA  | ASP | 147 | 25.290 | 39.727 | 59.624 | 1.00 | 0.00 | H |
| ATOM | 2295 | CB  | ASP | 147 | 25.071 | 40.833 | 61.415 | 1.00 | 0.00 | C |
| ATOM | 2296 | HB2 | ASP | 147 | 24.057 | 41.160 | 61.179 | 1.00 | 0.00 | H |
| ATOM | 2297 | HB3 | ASP | 147 | 24.982 | 39.914 | 61.997 | 1.00 | 0.00 | H |
| ATOM | 2298 | CG  | ASP | 147 | 25.765 | 41.874 | 62.283 | 1.00 | 0.00 | C |
| ATOM | 2299 | OD1 | ASP | 147 | 26.935 | 42.101 | 62.084 | 1.00 | 0.00 | O |
| ATOM | 2300 | OD2 | ASP | 147 | 25.118 | 42.434 | 63.135 | 1.00 | 0.00 | O |
| ATOM | 2301 | C   | ASP | 147 | 25.790 | 41.778 | 59.205 | 1.00 | 0.00 | C |
| ATOM | 2302 | O   | ASP | 147 | 24.777 | 42.500 | 59.197 | 1.00 | 0.00 | O |
| ATOM | 2303 | N   | LYS | 148 | 26.951 | 42.207 | 58.758 | 1.00 | 0.00 | N |
| ATOM | 2304 | H   | LYS | 148 | 27.758 | 41.631 | 58.953 | 1.00 | 0.00 | H |
| ATOM | 2305 | CA  | LYS | 148 | 27.206 | 43.393 | 58.008 | 1.00 | 0.00 | C |
| ATOM | 2306 | HA  | LYS | 148 | 26.348 | 43.579 | 57.361 | 1.00 | 0.00 | H |
| ATOM | 2307 | CB  | LYS | 148 | 27.335 | 44.576 | 58.969 | 1.00 | 0.00 | C |
| ATOM | 2308 | HB2 | LYS | 148 | 27.470 | 45.489 | 58.387 | 1.00 | 0.00 | H |



|      |      |      |     |     |        |        |        |      |      |   |
|------|------|------|-----|-----|--------|--------|--------|------|------|---|
| ATOM | 2309 | HB3  | LYS | 148 | 26.394 | 44.677 | 59.511 | 1.00 | 0.00 | H |
| ATOM | 2310 | CG   | LYS | 148 | 28.476 | 44.452 | 59.969 | 1.00 | 0.00 | C |
| ATOM | 2311 | HG2  | LYS | 148 | 28.368 | 43.561 | 60.583 | 1.00 | 0.00 | H |
| ATOM | 2312 | HG3  | LYS | 148 | 29.413 | 44.365 | 59.420 | 1.00 | 0.00 | H |
| ATOM | 2313 | CD   | LYS | 148 | 28.584 | 45.694 | 60.842 | 1.00 | 0.00 | C |
| ATOM | 2314 | HD2  | LYS | 148 | 29.531 | 45.671 | 61.383 | 1.00 | 0.00 | H |
| ATOM | 2315 | HD3  | LYS | 148 | 28.573 | 46.586 | 60.214 | 1.00 | 0.00 | H |
| ATOM | 2316 | CE   | LYS | 148 | 27.441 | 45.768 | 61.843 | 1.00 | 0.00 | C |
| ATOM | 2317 | HE2  | LYS | 148 | 27.467 | 46.745 | 62.327 | 1.00 | 0.00 | H |
| ATOM | 2318 | HE3  | LYS | 148 | 26.488 | 45.667 | 61.322 | 1.00 | 0.00 | H |
| ATOM | 2319 | NZ   | LYS | 148 | 27.549 | 44.716 | 62.890 | 1.00 | 0.00 | N |
| ATOM | 2320 | HZ1  | LYS | 148 | 26.788 | 44.804 | 63.548 | 1.00 | 0.00 | H |
| ATOM | 2321 | HZ2  | LYS | 148 | 27.482 | 43.798 | 62.467 | 1.00 | 0.00 | H |
| ATOM | 2322 | HZ3  | LYS | 148 | 28.430 | 44.794 | 63.375 | 1.00 | 0.00 | H |
| ATOM | 2323 | C    | LYS | 148 | 28.447 | 43.300 | 57.115 | 1.00 | 0.00 | C |
| ATOM | 2324 | O    | LYS | 148 | 29.381 | 42.552 | 57.434 | 1.00 | 0.00 | O |
| ATOM | 2325 | N    | ILE | 149 | 28.622 | 44.321 | 56.202 | 1.00 | 0.00 | N |
| ATOM | 2326 | H    | ILE | 149 | 27.915 | 45.028 | 56.068 | 1.00 | 0.00 | H |
| ATOM | 2327 | CA   | ILE | 149 | 29.782 | 44.277 | 55.277 | 1.00 | 0.00 | C |
| ATOM | 2328 | HA   | ILE | 149 | 30.578 | 43.679 | 55.721 | 1.00 | 0.00 | H |
| ATOM | 2329 | CB   | ILE | 149 | 29.381 | 43.620 | 53.943 | 1.00 | 0.00 | C |
| ATOM | 2330 | HB   | ILE | 149 | 28.978 | 42.632 | 54.158 | 1.00 | 0.00 | H |
| ATOM | 2331 | CG2  | ILE | 149 | 28.308 | 44.444 | 53.247 | 1.00 | 0.00 | C |
| ATOM | 2332 | HG21 | ILE | 149 | 27.998 | 43.960 | 52.322 | 1.00 | 0.00 | H |
| ATOM | 2333 | HG22 | ILE | 149 | 27.424 | 44.525 | 53.880 | 1.00 | 0.00 | H |
| ATOM | 2334 | HG23 | ILE | 149 | 28.663 | 45.447 | 53.022 | 1.00 | 0.00 | H |
| ATOM | 2335 | CG1  | ILE | 149 | 30.605 | 43.455 | 53.040 | 1.00 | 0.00 | C |
| ATOM | 2336 | HG12 | ILE | 149 | 30.938 | 44.422 | 52.664 | 1.00 | 0.00 | H |
| ATOM | 2337 | HG13 | ILE | 149 | 31.418 | 43.031 | 53.628 | 1.00 | 0.00 | H |
| ATOM | 2338 | CD1  | ILE | 149 | 30.375 | 42.538 | 51.860 | 1.00 | 0.00 | C |

|      |      |      |     |     |        |        |        |      |      |   |
|------|------|------|-----|-----|--------|--------|--------|------|------|---|
| ATOM | 2339 | HD11 | ILE | 149 | 31.319 | 42.383 | 51.341 | 1.00 | 0.00 | H |
| ATOM | 2340 | HD12 | ILE | 149 | 29.997 | 41.575 | 52.205 | 1.00 | 0.00 | H |
| ATOM | 2341 | HD13 | ILE | 149 | 29.663 | 42.971 | 51.160 | 1.00 | 0.00 | H |
| ATOM | 2342 | C    | ILE | 149 | 30.375 | 45.696 | 54.998 | 1.00 | 0.00 | C |
| ATOM | 2343 | O    | ILE | 149 | 29.653 | 46.680 | 55.176 | 1.00 | 0.00 | O |
| ATOM | 2344 | N    | ASN | 150 | 31.755 | 45.773 | 54.884 | 1.00 | 0.00 | N |
| ATOM | 2345 | H    | ASN | 150 | 32.266 | 44.902 | 54.906 | 1.00 | 0.00 | H |
| ATOM | 2346 | CA   | ASN | 150 | 32.563 | 46.973 | 54.612 | 1.00 | 0.00 | C |
| ATOM | 2347 | HA   | ASN | 150 | 32.343 | 47.688 | 55.407 | 1.00 | 0.00 | H |
| ATOM | 2348 | CB   | ASN | 150 | 34.035 | 46.620 | 54.714 | 1.00 | 0.00 | C |
| ATOM | 2349 | HB2  | ASN | 150 | 34.196 | 46.073 | 55.646 | 1.00 | 0.00 | H |
| ATOM | 2350 | HB3  | ASN | 150 | 34.321 | 45.962 | 53.892 | 1.00 | 0.00 | H |
| ATOM | 2351 | CG   | ASN | 150 | 34.923 | 47.833 | 54.698 | 1.00 | 0.00 | C |
| ATOM | 2352 | OD1  | ASN | 150 | 34.696 | 48.774 | 53.927 | 1.00 | 0.00 | O |
| ATOM | 2353 | ND2  | ASN | 150 | 35.930 | 47.831 | 55.533 | 1.00 | 0.00 | N |
| ATOM | 2354 | HD21 | ASN | 150 | 36.093 | 47.037 | 56.135 | 1.00 | 0.00 | H |
| ATOM | 2355 | HD22 | ASN | 150 | 36.571 | 48.610 | 55.532 | 1.00 | 0.00 | H |
| ATOM | 2356 | C    | ASN | 150 | 32.289 | 47.662 | 53.260 | 1.00 | 0.00 | C |
| ATOM | 2357 | O    | ASN | 150 | 32.417 | 47.013 | 52.207 | 1.00 | 0.00 | O |
| ATOM | 2358 | N    | SER | 151 | 31.846 | 48.903 | 53.300 | 1.00 | 0.00 | N |
| ATOM | 2359 | H    | SER | 151 | 31.776 | 49.379 | 54.188 | 1.00 | 0.00 | H |
| ATOM | 2360 | CA   | SER | 151 | 31.238 | 49.577 | 52.089 | 1.00 | 0.00 | C |
| ATOM | 2361 | HA   | SER | 151 | 30.370 | 48.999 | 51.774 | 1.00 | 0.00 | H |
| ATOM | 2362 | CB   | SER | 151 | 30.767 | 50.973 | 52.445 | 1.00 | 0.00 | C |
| ATOM | 2363 | HB2  | SER | 151 | 30.228 | 51.401 | 51.600 | 1.00 | 0.00 | H |
| ATOM | 2364 | HB3  | SER | 151 | 30.091 | 50.918 | 53.299 | 1.00 | 0.00 | H |
| ATOM | 2365 | OG   | SER | 151 | 31.850 | 51.802 | 52.766 | 1.00 | 0.00 | O |
| ATOM | 2366 | HG   | SER | 151 | 32.317 | 52.021 | 51.956 | 1.00 | 0.00 | H |
| ATOM | 2367 | C    | SER | 151 | 32.222 | 49.668 | 50.905 | 1.00 | 0.00 | C |
| ATOM | 2368 | O    | SER | 151 | 31.756 | 49.831 | 49.755 | 1.00 | 0.00 | O |

|      |      |      |     |     |        |        |        |      |      |   |
|------|------|------|-----|-----|--------|--------|--------|------|------|---|
| ATOM | 2369 | N    | THR | 152 | 33.537 | 49.584 | 51.229 | 1.00 | 0.00 | N |
| ATOM | 2370 | H    | THR | 152 | 33.756 | 49.451 | 52.207 | 1.00 | 0.00 | H |
| ATOM | 2371 | CA   | THR | 152 | 34.715 | 49.676 | 50.318 | 1.00 | 0.00 | C |
| ATOM | 2372 | HA   | THR | 152 | 34.546 | 50.521 | 49.649 | 1.00 | 0.00 | H |
| ATOM | 2373 | CB   | THR | 152 | 36.010 | 49.946 | 51.107 | 1.00 | 0.00 | C |
| ATOM | 2374 | HB   | THR | 152 | 36.844 | 50.078 | 50.417 | 1.00 | 0.00 | H |
| ATOM | 2375 | CG2  | THR | 152 | 35.872 | 51.211 | 51.941 | 1.00 | 0.00 | C |
| ATOM | 2376 | HG21 | THR | 152 | 36.826 | 51.424 | 52.420 | 1.00 | 0.00 | H |
| ATOM | 2377 | HG22 | THR | 152 | 35.605 | 52.048 | 51.297 | 1.00 | 0.00 | H |
| ATOM | 2378 | HG23 | THR | 152 | 35.112 | 51.100 | 52.714 | 1.00 | 0.00 | H |
| ATOM | 2379 | OG1  | THR | 152 | 36.286 | 48.836 | 51.971 | 1.00 | 0.00 | O |
| ATOM | 2380 | HG1  | THR | 152 | 35.626 | 48.822 | 52.675 | 1.00 | 0.00 | H |
| ATOM | 2381 | C    | THR | 152 | 34.955 | 48.484 | 49.474 | 1.00 | 0.00 | C |
| ATOM | 2382 | O    | THR | 152 | 35.830 | 48.678 | 48.616 | 1.00 | 0.00 | O |
| ATOM | 2383 | N    | SER | 153 | 34.261 | 47.358 | 49.651 | 1.00 | 0.00 | N |
| ATOM | 2384 | H    | SER | 153 | 33.603 | 47.308 | 50.417 | 1.00 | 0.00 | H |
| ATOM | 2385 | CA   | SER | 153 | 34.369 | 46.170 | 48.770 | 1.00 | 0.00 | C |
| ATOM | 2386 | HA   | SER | 153 | 34.960 | 46.441 | 47.899 | 1.00 | 0.00 | H |
| ATOM | 2387 | CB   | SER | 153 | 35.105 | 45.071 | 49.511 | 1.00 | 0.00 | C |
| ATOM | 2388 | HB2  | SER | 153 | 35.240 | 44.207 | 48.861 | 1.00 | 0.00 | H |
| ATOM | 2389 | HB3  | SER | 153 | 36.088 | 45.440 | 49.805 | 1.00 | 0.00 | H |
| ATOM | 2390 | OG   | SER | 153 | 34.401 | 44.681 | 50.659 | 1.00 | 0.00 | O |
| ATOM | 2391 | HG   | SER | 153 | 34.922 | 44.022 | 51.125 | 1.00 | 0.00 | H |
| ATOM | 2392 | C    | SER | 153 | 33.040 | 45.599 | 48.245 | 1.00 | 0.00 | C |
| ATOM | 2393 | O    | SER | 153 | 33.086 | 44.647 | 47.532 | 1.00 | 0.00 | O |
| ATOM | 2394 | N    | VAL | 154 | 31.845 | 46.137 | 48.669 | 1.00 | 0.00 | N |
| ATOM | 2395 | H    | VAL | 154 | 31.859 | 46.937 | 49.285 | 1.00 | 0.00 | H |
| ATOM | 2396 | CA   | VAL | 154 | 30.568 | 45.505 | 48.411 | 1.00 | 0.00 | C |
| ATOM | 2397 | HA   | VAL | 154 | 30.573 | 44.518 | 48.876 | 1.00 | 0.00 | H |
| ATOM | 2398 | CB   | VAL | 154 | 29.461 | 46.356 | 49.060 | 1.00 | 0.00 | C |

|      |      |      |     |     |        |        |        |      |      |   |
|------|------|------|-----|-----|--------|--------|--------|------|------|---|
| ATOM | 2399 | HB   | VAL | 154 | 29.553 | 47.390 | 48.722 | 1.00 | 0.00 | H |
| ATOM | 2400 | CG1  | VAL | 154 | 28.088 | 45.853 | 48.642 | 1.00 | 0.00 | C |
| ATOM | 2401 | HG11 | VAL | 154 | 27.320 | 46.372 | 49.216 | 1.00 | 0.00 | H |
| ATOM | 2402 | HG12 | VAL | 154 | 27.902 | 46.060 | 47.588 | 1.00 | 0.00 | H |
| ATOM | 2403 | HG13 | VAL | 154 | 28.011 | 44.783 | 48.834 | 1.00 | 0.00 | H |
| ATOM | 2404 | CG2  | VAL | 154 | 29.607 | 46.329 | 50.574 | 1.00 | 0.00 | C |
| ATOM | 2405 | HG21 | VAL | 154 | 28.752 | 46.822 | 51.037 | 1.00 | 0.00 | H |
| ATOM | 2406 | HG22 | VAL | 154 | 29.679 | 45.304 | 50.925 | 1.00 | 0.00 | H |
| ATOM | 2407 | HG23 | VAL | 154 | 30.493 | 46.884 | 50.848 | 1.00 | 0.00 | H |
| ATOM | 2408 | C    | VAL | 154 | 30.266 | 45.308 | 46.861 | 1.00 | 0.00 | C |
| ATOM | 2409 | O    | VAL | 154 | 29.863 | 44.217 | 46.469 | 1.00 | 0.00 | O |
| ATOM | 2410 | N    | ALA | 155 | 30.453 | 46.311 | 45.979 | 1.00 | 0.00 | N |
| ATOM | 2411 | H    | ALA | 155 | 30.815 | 47.189 | 46.320 | 1.00 | 0.00 | H |
| ATOM | 2412 | CA   | ALA | 155 | 30.076 | 46.265 | 44.551 | 1.00 | 0.00 | C |
| ATOM | 2413 | HA   | ALA | 155 | 28.998 | 46.108 | 44.493 | 1.00 | 0.00 | H |
| ATOM | 2414 | CB   | ALA | 155 | 30.399 | 47.571 | 43.836 | 1.00 | 0.00 | C |
| ATOM | 2415 | HB1  | ALA | 155 | 29.908 | 47.585 | 42.868 | 1.00 | 0.00 | H |
| ATOM | 2416 | HB2  | ALA | 155 | 30.012 | 48.410 | 44.416 | 1.00 | 0.00 | H |
| ATOM | 2417 | HB3  | ALA | 155 | 31.470 | 47.701 | 43.709 | 1.00 | 0.00 | H |
| ATOM | 2418 | C    | ALA | 155 | 30.777 | 45.142 | 43.760 | 1.00 | 0.00 | C |
| ATOM | 2419 | O    | ALA | 155 | 30.112 | 44.263 | 43.284 | 1.00 | 0.00 | O |
| ATOM | 2420 | N    | ALA | 156 | 32.133 | 45.086 | 43.872 | 1.00 | 0.00 | N |
| ATOM | 2421 | H    | ALA | 156 | 32.648 | 45.827 | 44.326 | 1.00 | 0.00 | H |
| ATOM | 2422 | CA   | ALA | 156 | 32.834 | 44.029 | 43.257 | 1.00 | 0.00 | C |
| ATOM | 2423 | HA   | ALA | 156 | 32.596 | 44.030 | 42.194 | 1.00 | 0.00 | H |
| ATOM | 2424 | CB   | ALA | 156 | 34.304 | 44.369 | 43.386 | 1.00 | 0.00 | C |
| ATOM | 2425 | HB1  | ALA | 156 | 34.902 | 43.545 | 42.994 | 1.00 | 0.00 | H |
| ATOM | 2426 | HB2  | ALA | 156 | 34.556 | 45.257 | 42.819 | 1.00 | 0.00 | H |
| ATOM | 2427 | HB3  | ALA | 156 | 34.542 | 44.492 | 44.439 | 1.00 | 0.00 | H |
| ATOM | 2428 | C    | ALA | 156 | 32.553 | 42.619 | 43.781 | 1.00 | 0.00 | C |

|      |      |      |     |     |        |        |        |      |      |   |
|------|------|------|-----|-----|--------|--------|--------|------|------|---|
| ATOM | 2429 | O    | ALA | 156 | 32.442 | 41.652 | 43.014 | 1.00 | 0.00 | O |
| ATOM | 2430 | N    | LEU | 157 | 32.424 | 42.513 | 45.092 | 1.00 | 0.00 | N |
| ATOM | 2431 | H    | LEU | 157 | 32.518 | 43.322 | 45.690 | 1.00 | 0.00 | H |
| ATOM | 2432 | CA   | LEU | 157 | 32.286 | 41.160 | 45.701 | 1.00 | 0.00 | C |
| ATOM | 2433 | HA   | LEU | 157 | 33.094 | 40.524 | 45.345 | 1.00 | 0.00 | H |
| ATOM | 2434 | CB   | LEU | 157 | 32.308 | 41.217 | 47.234 | 1.00 | 0.00 | C |
| ATOM | 2435 | HB2  | LEU | 157 | 31.574 | 41.958 | 47.556 | 1.00 | 0.00 | H |
| ATOM | 2436 | HB3  | LEU | 157 | 31.982 | 40.253 | 47.625 | 1.00 | 0.00 | H |
| ATOM | 2437 | CG   | LEU | 157 | 33.661 | 41.567 | 47.867 | 1.00 | 0.00 | C |
| ATOM | 2438 | HG   | LEU | 157 | 34.046 | 42.494 | 47.458 | 1.00 | 0.00 | H |
| ATOM | 2439 | CD1  | LEU | 157 | 33.496 | 41.704 | 49.374 | 1.00 | 0.00 | C |
| ATOM | 2440 | HD11 | LEU | 157 | 34.460 | 41.925 | 49.829 | 1.00 | 0.00 | H |
| ATOM | 2441 | HD12 | LEU | 157 | 32.813 | 42.525 | 49.589 | 1.00 | 0.00 | H |
| ATOM | 2442 | HD13 | LEU | 157 | 33.105 | 40.779 | 49.799 | 1.00 | 0.00 | H |
| ATOM | 2443 | CD2  | LEU | 157 | 34.677 | 40.487 | 47.524 | 1.00 | 0.00 | C |
| ATOM | 2444 | HD21 | LEU | 157 | 35.605 | 40.679 | 48.063 | 1.00 | 0.00 | H |
| ATOM | 2445 | HD22 | LEU | 157 | 34.307 | 39.505 | 47.808 | 1.00 | 0.00 | H |
| ATOM | 2446 | HD23 | LEU | 157 | 34.909 | 40.497 | 46.461 | 1.00 | 0.00 | H |
| ATOM | 2447 | C    | LEU | 157 | 31.024 | 40.554 | 45.269 | 1.00 | 0.00 | C |
| ATOM | 2448 | O    | LEU | 157 | 31.036 | 39.312 | 45.101 | 1.00 | 0.00 | O |
| ATOM | 2449 | N    | LYS | 158 | 29.903 | 41.333 | 45.172 | 1.00 | 0.00 | N |
| ATOM | 2450 | H    | LYS | 158 | 30.032 | 42.310 | 45.400 | 1.00 | 0.00 | H |
| ATOM | 2451 | CA   | LYS | 158 | 28.605 | 41.019 | 44.663 | 1.00 | 0.00 | C |
| ATOM | 2452 | HA   | LYS | 158 | 28.241 | 40.137 | 45.187 | 1.00 | 0.00 | H |
| ATOM | 2453 | CB   | LYS | 158 | 27.655 | 42.178 | 44.968 | 1.00 | 0.00 | C |
| ATOM | 2454 | HB2  | LYS | 158 | 28.116 | 43.124 | 44.681 | 1.00 | 0.00 | H |
| ATOM | 2455 | HB3  | LYS | 158 | 26.763 | 42.051 | 44.352 | 1.00 | 0.00 | H |
| ATOM | 2456 | CG   | LYS | 158 | 27.195 | 42.249 | 46.419 | 1.00 | 0.00 | C |
| ATOM | 2457 | HG2  | LYS | 158 | 26.747 | 41.291 | 46.686 | 1.00 | 0.00 | H |
| ATOM | 2458 | HG3  | LYS | 158 | 28.046 | 42.425 | 47.077 | 1.00 | 0.00 | H |

|      |      |     |     |     |        |        |        |      |      |   |
|------|------|-----|-----|-----|--------|--------|--------|------|------|---|
| ATOM | 2459 | CD  | LYS | 158 | 26.159 | 43.345 | 46.616 | 1.00 | 0.00 | C |
| ATOM | 2460 | HD2 | LYS | 158 | 26.634 | 44.316 | 46.473 | 1.00 | 0.00 | H |
| ATOM | 2461 | HD3 | LYS | 158 | 25.368 | 43.232 | 45.873 | 1.00 | 0.00 | H |
| ATOM | 2462 | CE  | LYS | 158 | 25.533 | 43.273 | 48.002 | 1.00 | 0.00 | C |
| ATOM | 2463 | HE2 | LYS | 158 | 25.036 | 42.308 | 48.115 | 1.00 | 0.00 | H |
| ATOM | 2464 | HE3 | LYS | 158 | 26.324 | 43.347 | 48.750 | 1.00 | 0.00 | H |
| ATOM | 2465 | NZ  | LYS | 158 | 24.546 | 44.365 | 48.224 | 1.00 | 0.00 | N |
| ATOM | 2466 | HZ1 | LYS | 158 | 23.806 | 44.301 | 47.539 | 1.00 | 0.00 | H |
| ATOM | 2467 | HZ2 | LYS | 158 | 24.151 | 44.283 | 49.151 | 1.00 | 0.00 | H |
| ATOM | 2468 | HZ3 | LYS | 158 | 25.001 | 45.263 | 48.135 | 1.00 | 0.00 | H |
| ATOM | 2469 | C   | LYS | 158 | 28.539 | 40.705 | 43.202 | 1.00 | 0.00 | C |
| ATOM | 2470 | O   | LYS | 158 | 27.931 | 39.737 | 42.744 | 1.00 | 0.00 | O |
| ATOM | 2471 | N   | HIE | 159 | 29.389 | 41.385 | 42.437 | 1.00 | 0.00 | N |
| ATOM | 2472 | H   | HIE | 159 | 29.935 | 42.137 | 42.834 | 1.00 | 0.00 | H |
| ATOM | 2473 | CA  | HIE | 159 | 29.595 | 41.039 | 41.046 | 1.00 | 0.00 | C |
| ATOM | 2474 | HA  | HIE | 159 | 28.622 | 40.914 | 40.569 | 1.00 | 0.00 | H |
| ATOM | 2475 | CB  | HIE | 159 | 30.348 | 42.160 | 40.321 | 1.00 | 0.00 | C |
| ATOM | 2476 | HB2 | HIE | 159 | 29.912 | 43.112 | 40.622 | 1.00 | 0.00 | H |
| ATOM | 2477 | HB3 | HIE | 159 | 31.392 | 42.159 | 40.622 | 1.00 | 0.00 | H |
| ATOM | 2478 | CG  | HIE | 159 | 30.254 | 42.079 | 38.828 | 1.00 | 0.00 | C |
| ATOM | 2479 | ND1 | HIE | 159 | 30.654 | 43.108 | 38.002 | 1.00 | 0.00 | N |
| ATOM | 2480 | CE1 | HIE | 159 | 30.457 | 42.758 | 36.742 | 1.00 | 0.00 | C |
| ATOM | 2481 | HE1 | HIE | 159 | 30.657 | 43.352 | 35.867 | 1.00 | 0.00 | H |
| ATOM | 2482 | NE2 | HIE | 159 | 29.944 | 41.541 | 36.724 | 1.00 | 0.00 | N |
| ATOM | 2483 | HE2 | HIE | 159 | 29.681 | 41.026 | 35.896 | 1.00 | 0.00 | H |
| ATOM | 2484 | CD2 | HIE | 159 | 29.807 | 41.094 | 38.015 | 1.00 | 0.00 | C |
| ATOM | 2485 | HD2 | HIE | 159 | 29.427 | 40.137 | 38.319 | 1.00 | 0.00 | H |
| ATOM | 2486 | C   | HIE | 159 | 30.381 | 39.693 | 40.954 | 1.00 | 0.00 | C |
| ATOM | 2487 | O   | HIE | 159 | 29.959 | 38.782 | 40.230 | 1.00 | 0.00 | O |
| ATOM | 2488 | N   | ILE | 160 | 31.457 | 39.418 | 41.697 | 1.00 | 0.00 | N |

|      |      |      |     |     |        |        |        |      |      |   |
|------|------|------|-----|-----|--------|--------|--------|------|------|---|
| ATOM | 2489 | H    | ILE | 160 | 31.777 | 40.133 | 42.329 | 1.00 | 0.00 | H |
| ATOM | 2490 | CA   | ILE | 160 | 32.261 | 38.200 | 41.659 | 1.00 | 0.00 | C |
| ATOM | 2491 | HA   | ILE | 160 | 32.663 | 38.098 | 40.649 | 1.00 | 0.00 | H |
| ATOM | 2492 | CB   | ILE | 160 | 33.445 | 38.336 | 42.634 | 1.00 | 0.00 | C |
| ATOM | 2493 | HB   | ILE | 160 | 33.066 | 38.647 | 43.607 | 1.00 | 0.00 | H |
| ATOM | 2494 | CG2  | ILE | 160 | 34.144 | 36.997 | 42.812 | 1.00 | 0.00 | C |
| ATOM | 2495 | HG21 | ILE | 160 | 35.076 | 37.109 | 43.362 | 1.00 | 0.00 | H |
| ATOM | 2496 | HG22 | ILE | 160 | 33.533 | 36.306 | 43.392 | 1.00 | 0.00 | H |
| ATOM | 2497 | HG23 | ILE | 160 | 34.365 | 36.553 | 41.842 | 1.00 | 0.00 | H |
| ATOM | 2498 | CG1  | ILE | 160 | 34.429 | 39.396 | 42.134 | 1.00 | 0.00 | C |
| ATOM | 2499 | HG12 | ILE | 160 | 34.957 | 39.023 | 41.262 | 1.00 | 0.00 | H |
| ATOM | 2500 | HG13 | ILE | 160 | 33.903 | 40.278 | 41.809 | 1.00 | 0.00 | H |
| ATOM | 2501 | CD1  | ILE | 160 | 35.449 | 39.818 | 43.167 | 1.00 | 0.00 | C |
| ATOM | 2502 | HD11 | ILE | 160 | 36.004 | 40.680 | 42.797 | 1.00 | 0.00 | H |
| ATOM | 2503 | HD12 | ILE | 160 | 34.948 | 40.099 | 44.091 | 1.00 | 0.00 | H |
| ATOM | 2504 | HD13 | ILE | 160 | 36.154 | 39.013 | 43.367 | 1.00 | 0.00 | H |
| ATOM | 2505 | C    | ILE | 160 | 31.524 | 36.899 | 41.977 | 1.00 | 0.00 | C |
| ATOM | 2506 | O    | ILE | 160 | 31.333 | 36.016 | 41.130 | 1.00 | 0.00 | O |
| ATOM | 2507 | N    | LEU | 161 | 30.790 | 36.858 | 43.107 | 1.00 | 0.00 | N |
| ATOM | 2508 | H    | LEU | 161 | 30.842 | 37.646 | 43.737 | 1.00 | 0.00 | H |
| ATOM | 2509 | CA   | LEU | 161 | 29.999 | 35.688 | 43.557 | 1.00 | 0.00 | C |
| ATOM | 2510 | HA   | LEU | 161 | 30.653 | 34.815 | 43.547 | 1.00 | 0.00 | H |
| ATOM | 2511 | CB   | LEU | 161 | 29.508 | 35.909 | 44.993 | 1.00 | 0.00 | C |
| ATOM | 2512 | HB2  | LEU | 161 | 29.019 | 35.008 | 45.344 | 1.00 | 0.00 | H |
| ATOM | 2513 | HB3  | LEU | 161 | 30.395 | 36.017 | 45.609 | 1.00 | 0.00 | H |
| ATOM | 2514 | CG   | LEU | 161 | 28.619 | 37.140 | 45.210 | 1.00 | 0.00 | C |
| ATOM | 2515 | HG   | LEU | 161 | 28.924 | 37.954 | 44.558 | 1.00 | 0.00 | H |
| ATOM | 2516 | CD1  | LEU | 161 | 27.173 | 36.786 | 44.892 | 1.00 | 0.00 | C |
| ATOM | 2517 | HD11 | LEU | 161 | 26.496 | 37.486 | 45.380 | 1.00 | 0.00 | H |
| ATOM | 2518 | HD12 | LEU | 161 | 27.010 | 36.872 | 43.827 | 1.00 | 0.00 | H |

|      |      |      |     |     |        |        |        |      |      |   |
|------|------|------|-----|-----|--------|--------|--------|------|------|---|
| ATOM | 2519 | HD13 | LEU | 161 | 26.930 | 35.776 | 45.217 | 1.00 | 0.00 | H |
| ATOM | 2520 | CD2  | LEU | 161 | 28.761 | 37.622 | 46.646 | 1.00 | 0.00 | C |
| ATOM | 2521 | HD21 | LEU | 161 | 28.123 | 38.489 | 46.813 | 1.00 | 0.00 | H |
| ATOM | 2522 | HD22 | LEU | 161 | 28.478 | 36.833 | 47.340 | 1.00 | 0.00 | H |
| ATOM | 2523 | HD23 | LEU | 161 | 29.790 | 37.914 | 46.844 | 1.00 | 0.00 | H |
| ATOM | 2524 | C    | LEU | 161 | 28.804 | 35.380 | 42.685 | 1.00 | 0.00 | C |
| ATOM | 2525 | O    | LEU | 161 | 28.135 | 34.374 | 42.971 | 1.00 | 0.00 | O |
| ATOM | 2526 | N    | LEU | 162 | 28.469 | 36.108 | 41.591 | 1.00 | 0.00 | N |
| ATOM | 2527 | H    | LEU | 162 | 29.079 | 36.887 | 41.386 | 1.00 | 0.00 | H |
| ATOM | 2528 | CA   | LEU | 162 | 27.395 | 35.939 | 40.652 | 1.00 | 0.00 | C |
| ATOM | 2529 | HA   | LEU | 162 | 26.974 | 34.948 | 40.809 | 1.00 | 0.00 | H |
| ATOM | 2530 | CB   | LEU | 162 | 26.323 | 36.988 | 40.972 | 1.00 | 0.00 | C |
| ATOM | 2531 | HB2  | LEU | 162 | 25.949 | 36.807 | 41.977 | 1.00 | 0.00 | H |
| ATOM | 2532 | HB3  | LEU | 162 | 26.792 | 37.973 | 40.953 | 1.00 | 0.00 | H |
| ATOM | 2533 | CG   | LEU | 162 | 25.116 | 37.017 | 40.025 | 1.00 | 0.00 | C |
| ATOM | 2534 | HG   | LEU | 162 | 25.416 | 37.278 | 39.020 | 1.00 | 0.00 | H |
| ATOM | 2535 | CD1  | LEU | 162 | 24.426 | 35.660 | 40.040 | 1.00 | 0.00 | C |
| ATOM | 2536 | HD11 | LEU | 162 | 23.525 | 35.704 | 39.428 | 1.00 | 0.00 | H |
| ATOM | 2537 | HD12 | LEU | 162 | 25.062 | 34.883 | 39.628 | 1.00 | 0.00 | H |
| ATOM | 2538 | HD13 | LEU | 162 | 24.149 | 35.389 | 41.059 | 1.00 | 0.00 | H |
| ATOM | 2539 | CD2  | LEU | 162 | 24.161 | 38.121 | 40.453 | 1.00 | 0.00 | C |
| ATOM | 2540 | HD21 | LEU | 162 | 23.307 | 38.152 | 39.776 | 1.00 | 0.00 | H |
| ATOM | 2541 | HD22 | LEU | 162 | 23.808 | 37.943 | 41.469 | 1.00 | 0.00 | H |
| ATOM | 2542 | HD23 | LEU | 162 | 24.671 | 39.084 | 40.412 | 1.00 | 0.00 | H |
| ATOM | 2543 | C    | LEU | 162 | 27.787 | 36.034 | 39.139 | 1.00 | 0.00 | C |
| ATOM | 2544 | O    | LEU | 162 | 26.954 | 35.692 | 38.283 | 1.00 | 0.00 | O |
| ATOM | 2545 | N    | ASP | 163 | 28.956 | 36.567 | 38.821 | 1.00 | 0.00 | N |
| ATOM | 2546 | H    | ASP | 163 | 29.606 | 36.800 | 39.560 | 1.00 | 0.00 | H |
| ATOM | 2547 | CA   | ASP | 163 | 29.330 | 36.989 | 37.433 | 1.00 | 0.00 | C |
| ATOM | 2548 | HA   | ASP | 163 | 30.242 | 37.577 | 37.513 | 1.00 | 0.00 | H |



|      |      |     |     |     |        |        |        |      |      |   |
|------|------|-----|-----|-----|--------|--------|--------|------|------|---|
| ATOM | 2549 | CB  | ASP | 163 | 29.621 | 35.757 | 36.572 | 1.00 | 0.00 | C |
| ATOM | 2550 | HB2 | ASP | 163 | 28.761 | 35.086 | 36.559 | 1.00 | 0.00 | H |
| ATOM | 2551 | HB3 | ASP | 163 | 29.824 | 36.056 | 35.543 | 1.00 | 0.00 | H |
| ATOM | 2552 | CG  | ASP | 163 | 30.863 | 34.999 | 37.022 | 1.00 | 0.00 | C |
| ATOM | 2553 | OD1 | ASP | 163 | 31.794 | 35.632 | 37.461 | 1.00 | 0.00 | O |
| ATOM | 2554 | OD2 | ASP | 163 | 30.868 | 33.796 | 36.922 | 1.00 | 0.00 | O |
| ATOM | 2555 | C   | ASP | 163 | 28.364 | 37.814 | 36.673 | 1.00 | 0.00 | C |
| ATOM | 2556 | O   | ASP | 163 | 28.075 | 37.750 | 35.473 | 1.00 | 0.00 | O |
| ATOM | 2557 | N   | GLY | 164 | 27.593 | 38.658 | 37.405 | 1.00 | 0.00 | N |
| ATOM | 2558 | H   | GLY | 164 | 27.796 | 38.718 | 38.392 | 1.00 | 0.00 | H |
| ATOM | 2559 | CA  | GLY | 164 | 26.432 | 39.348 | 36.974 | 1.00 | 0.00 | C |
| ATOM | 2560 | HA2 | GLY | 164 | 26.133 | 40.047 | 37.755 | 1.00 | 0.00 | H |
| ATOM | 2561 | HA3 | GLY | 164 | 26.675 | 39.919 | 36.077 | 1.00 | 0.00 | H |
| ATOM | 2562 | C   | GLY | 164 | 25.190 | 38.379 | 36.647 | 1.00 | 0.00 | C |
| ATOM | 2563 | O   | GLY | 164 | 24.065 | 38.591 | 37.095 | 1.00 | 0.00 | O |
| ATOM | 2564 | N   | SER | 165 | 25.507 | 37.335 | 35.889 | 1.00 | 0.00 | N |
| ATOM | 2565 | H   | SER | 165 | 26.431 | 37.222 | 35.508 | 1.00 | 0.00 | H |
| ATOM | 2566 | CA  | SER | 165 | 24.646 | 36.182 | 35.904 | 1.00 | 0.00 | C |
| ATOM | 2567 | HA  | SER | 165 | 24.200 | 36.077 | 36.895 | 1.00 | 0.00 | H |
| ATOM | 2568 | CB  | SER | 165 | 23.526 | 36.383 | 34.902 | 1.00 | 0.00 | C |
| ATOM | 2569 | HB2 | SER | 165 | 23.950 | 36.580 | 33.917 | 1.00 | 0.00 | H |
| ATOM | 2570 | HB3 | SER | 165 | 22.918 | 35.481 | 34.848 | 1.00 | 0.00 | H |
| ATOM | 2571 | OG  | SER | 165 | 22.703 | 37.453 | 35.276 | 1.00 | 0.00 | O |
| ATOM | 2572 | HG  | SER | 165 | 23.261 | 38.188 | 35.549 | 1.00 | 0.00 | H |
| ATOM | 2573 | C   | SER | 165 | 25.450 | 34.869 | 35.588 | 1.00 | 0.00 | C |
| ATOM | 2574 | O   | SER | 165 | 26.062 | 34.658 | 34.531 | 1.00 | 0.00 | O |
| ATOM | 2575 | N   | LEU | 166 | 25.512 | 34.063 | 36.641 | 1.00 | 0.00 | N |
| ATOM | 2576 | H   | LEU | 166 | 25.079 | 34.333 | 37.512 | 1.00 | 0.00 | H |
| ATOM | 2577 | CA  | LEU | 166 | 26.334 | 32.817 | 36.613 | 1.00 | 0.00 | C |
| ATOM | 2578 | HA  | LEU | 166 | 27.253 | 33.024 | 36.061 | 1.00 | 0.00 | H |

|      |      |      |     |     |        |        |        |      |      |   |
|------|------|------|-----|-----|--------|--------|--------|------|------|---|
| ATOM | 2579 | CB   | LEU | 166 | 26.729 | 32.446 | 38.048 | 1.00 | 0.00 | C |
| ATOM | 2580 | HB2  | LEU | 166 | 27.634 | 31.843 | 38.010 | 1.00 | 0.00 | H |
| ATOM | 2581 | HB3  | LEU | 166 | 27.024 | 33.343 | 38.577 | 1.00 | 0.00 | H |
| ATOM | 2582 | CG   | LEU | 166 | 25.656 | 31.714 | 38.865 | 1.00 | 0.00 | C |
| ATOM | 2583 | HG   | LEU | 166 | 24.670 | 32.122 | 38.656 | 1.00 | 0.00 | H |
| ATOM | 2584 | CD1  | LEU | 166 | 25.677 | 30.231 | 38.519 | 1.00 | 0.00 | C |
| ATOM | 2585 | HD11 | LEU | 166 | 25.350 | 29.661 | 39.389 | 1.00 | 0.00 | H |
| ATOM | 2586 | HD12 | LEU | 166 | 24.965 | 29.979 | 37.741 | 1.00 | 0.00 | H |
| ATOM | 2587 | HD13 | LEU | 166 | 26.673 | 29.875 | 38.269 | 1.00 | 0.00 | H |
| ATOM | 2588 | CD2  | LEU | 166 | 25.911 | 31.933 | 40.349 | 1.00 | 0.00 | C |
| ATOM | 2589 | HD21 | LEU | 166 | 25.153 | 31.413 | 40.936 | 1.00 | 0.00 | H |
| ATOM | 2590 | HD22 | LEU | 166 | 26.898 | 31.553 | 40.619 | 1.00 | 0.00 | H |
| ATOM | 2591 | HD23 | LEU | 166 | 25.862 | 32.991 | 40.593 | 1.00 | 0.00 | H |
| ATOM | 2592 | C    | LEU | 166 | 25.609 | 31.583 | 35.929 | 1.00 | 0.00 | C |
| ATOM | 2593 | O    | LEU | 166 | 26.329 | 30.645 | 35.638 | 1.00 | 0.00 | O |
| ATOM | 2594 | N    | PRO | 167 | 24.318 | 31.510 | 35.685 | 1.00 | 0.00 | N |
| ATOM | 2595 | CD   | PRO | 167 | 23.346 | 32.553 | 36.081 | 1.00 | 0.00 | C |
| ATOM | 2596 | HD2  | PRO | 167 | 23.371 | 33.381 | 35.376 | 1.00 | 0.00 | H |
| ATOM | 2597 | HD3  | PRO | 167 | 23.431 | 32.874 | 37.117 | 1.00 | 0.00 | H |
| ATOM | 2598 | CG   | PRO | 167 | 22.043 | 31.819 | 35.906 | 1.00 | 0.00 | C |
| ATOM | 2599 | HG2  | PRO | 167 | 21.232 | 32.502 | 35.651 | 1.00 | 0.00 | H |
| ATOM | 2600 | HG3  | PRO | 167 | 21.804 | 31.276 | 36.823 | 1.00 | 0.00 | H |
| ATOM | 2601 | CB   | PRO | 167 | 22.308 | 30.849 | 34.807 | 1.00 | 0.00 | C |
| ATOM | 2602 | HB2  | PRO | 167 | 22.281 | 31.367 | 33.847 | 1.00 | 0.00 | H |
| ATOM | 2603 | HB3  | PRO | 167 | 21.582 | 30.035 | 34.811 | 1.00 | 0.00 | H |
| ATOM | 2604 | CA   | PRO | 167 | 23.721 | 30.331 | 35.095 | 1.00 | 0.00 | C |
| ATOM | 2605 | HA   | PRO | 167 | 23.678 | 29.535 | 35.839 | 1.00 | 0.00 | H |
| ATOM | 2606 | C    | PRO | 167 | 24.461 | 29.792 | 33.757 | 1.00 | 0.00 | C |
| ATOM | 2607 | O    | PRO | 167 | 24.497 | 28.594 | 33.543 | 1.00 | 0.00 | O |
| ATOM | 2608 | N    | PRO | 168 | 25.077 | 30.597 | 32.808 | 1.00 | 0.00 | N |

|      |      |     |     |     |        |        |        |      |      |   |
|------|------|-----|-----|-----|--------|--------|--------|------|------|---|
| ATOM | 2609 | CD  | PRO | 168 | 25.085 | 32.090 | 32.832 | 1.00 | 0.00 | C |
| ATOM | 2610 | HD2 | PRO | 168 | 25.867 | 32.432 | 33.506 | 1.00 | 0.00 | H |
| ATOM | 2611 | HD3 | PRO | 168 | 24.116 | 32.513 | 33.092 | 1.00 | 0.00 | H |
| ATOM | 2612 | CG  | PRO | 168 | 25.466 | 32.452 | 31.421 | 1.00 | 0.00 | C |
| ATOM | 2613 | HG2 | PRO | 168 | 25.956 | 33.425 | 31.380 | 1.00 | 0.00 | H |
| ATOM | 2614 | HG3 | PRO | 168 | 24.575 | 32.452 | 30.791 | 1.00 | 0.00 | H |
| ATOM | 2615 | CB  | PRO | 168 | 26.382 | 31.357 | 30.992 | 1.00 | 0.00 | C |
| ATOM | 2616 | HB2 | PRO | 168 | 27.370 | 31.529 | 31.423 | 1.00 | 0.00 | H |
| ATOM | 2617 | HB3 | PRO | 168 | 26.453 | 31.296 | 29.906 | 1.00 | 0.00 | H |
| ATOM | 2618 | CA  | PRO | 168 | 25.756 | 30.090 | 31.584 | 1.00 | 0.00 | C |
| ATOM | 2619 | HA  | PRO | 168 | 25.010 | 29.687 | 30.898 | 1.00 | 0.00 | H |
| ATOM | 2620 | C   | PRO | 168 | 26.833 | 29.029 | 31.910 | 1.00 | 0.00 | C |
| ATOM | 2621 | O   | PRO | 168 | 27.686 | 29.155 | 32.794 | 1.00 | 0.00 | O |
| ATOM | 2622 | N   | LYS | 169 | 26.750 | 27.837 | 31.316 | 1.00 | 0.00 | N |
| ATOM | 2623 | H   | LYS | 169 | 26.022 | 27.700 | 30.631 | 1.00 | 0.00 | H |
| ATOM | 2624 | CA  | LYS | 169 | 27.613 | 26.666 | 31.608 | 1.00 | 0.00 | C |
| ATOM | 2625 | HA  | LYS | 169 | 27.126 | 25.783 | 31.195 | 1.00 | 0.00 | H |
| ATOM | 2626 | CB  | LYS | 169 | 28.968 | 26.840 | 30.922 | 1.00 | 0.00 | C |
| ATOM | 2627 | HB2 | LYS | 169 | 29.463 | 27.732 | 31.312 | 1.00 | 0.00 | H |
| ATOM | 2628 | HB3 | LYS | 169 | 29.599 | 25.978 | 31.147 | 1.00 | 0.00 | H |
| ATOM | 2629 | CG  | LYS | 169 | 28.898 | 26.928 | 29.403 | 1.00 | 0.00 | C |
| ATOM | 2630 | HG2 | LYS | 169 | 28.404 | 26.036 | 29.014 | 1.00 | 0.00 | H |
| ATOM | 2631 | HG3 | LYS | 169 | 28.318 | 27.805 | 29.114 | 1.00 | 0.00 | H |
| ATOM | 2632 | CD  | LYS | 169 | 30.287 | 27.037 | 28.791 | 1.00 | 0.00 | C |
| ATOM | 2633 | HD2 | LYS | 169 | 30.786 | 27.920 | 29.194 | 1.00 | 0.00 | H |
| ATOM | 2634 | HD3 | LYS | 169 | 30.868 | 26.152 | 29.055 | 1.00 | 0.00 | H |
| ATOM | 2635 | CE  | LYS | 169 | 30.217 | 27.155 | 27.276 | 1.00 | 0.00 | C |
| ATOM | 2636 | HE2 | LYS | 169 | 29.733 | 26.264 | 26.873 | 1.00 | 0.00 | H |
| ATOM | 2637 | HE3 | LYS | 169 | 29.612 | 28.026 | 27.019 | 1.00 | 0.00 | H |
| ATOM | 2638 | NZ  | LYS | 169 | 31.566 | 27.301 | 26.666 | 1.00 | 0.00 | N |

|      |      |      |     |     |        |        |        |      |      |   |
|------|------|------|-----|-----|--------|--------|--------|------|------|---|
| ATOM | 2639 | HZ1  | LYS | 169 | 31.482 | 27.393 | 25.663 | 1.00 | 0.00 | H |
| ATOM | 2640 | HZ2  | LYS | 169 | 32.020 | 28.124 | 27.040 | 1.00 | 0.00 | H |
| ATOM | 2641 | HZ3  | LYS | 169 | 32.127 | 26.487 | 26.878 | 1.00 | 0.00 | H |
| ATOM | 2642 | C    | LYS | 169 | 27.833 | 26.401 | 33.118 | 1.00 | 0.00 | C |
| ATOM | 2643 | O    | LYS | 169 | 28.864 | 25.906 | 33.448 | 1.00 | 0.00 | O |
| ATOM | 2644 | N    | ARG | 170 | 26.776 | 26.605 | 33.925 | 1.00 | 0.00 | N |
| ATOM | 2645 | H    | ARG | 170 | 25.957 | 27.004 | 33.488 | 1.00 | 0.00 | H |
| ATOM | 2646 | CA   | ARG | 170 | 26.667 | 26.431 | 35.398 | 1.00 | 0.00 | C |
| ATOM | 2647 | HA   | ARG | 170 | 25.780 | 26.967 | 35.737 | 1.00 | 0.00 | H |
| ATOM | 2648 | CB   | ARG | 170 | 26.505 | 24.950 | 35.711 | 1.00 | 0.00 | C |
| ATOM | 2649 | HB2  | ARG | 170 | 27.397 | 24.411 | 35.384 | 1.00 | 0.00 | H |
| ATOM | 2650 | HB3  | ARG | 170 | 26.409 | 24.828 | 36.791 | 1.00 | 0.00 | H |
| ATOM | 2651 | CG   | ARG | 170 | 25.276 | 24.298 | 35.099 | 1.00 | 0.00 | C |
| ATOM | 2652 | HG2  | ARG | 170 | 24.388 | 24.848 | 35.416 | 1.00 | 0.00 | H |
| ATOM | 2653 | HG3  | ARG | 170 | 25.344 | 24.339 | 34.011 | 1.00 | 0.00 | H |
| ATOM | 2654 | CD   | ARG | 170 | 25.144 | 22.878 | 35.515 | 1.00 | 0.00 | C |
| ATOM | 2655 | HD2  | ARG | 170 | 26.038 | 22.336 | 35.203 | 1.00 | 0.00 | H |
| ATOM | 2656 | HD3  | ARG | 170 | 25.066 | 22.832 | 36.603 | 1.00 | 0.00 | H |
| ATOM | 2657 | NE   | ARG | 170 | 23.972 | 22.248 | 34.927 | 1.00 | 0.00 | N |
| ATOM | 2658 | HE   | ARG | 170 | 23.367 | 22.834 | 34.371 | 1.00 | 0.00 | H |
| ATOM | 2659 | CZ   | ARG | 170 | 23.645 | 20.949 | 35.079 | 1.00 | 0.00 | C |
| ATOM | 2660 | NH1  | ARG | 170 | 24.408 | 20.159 | 35.800 | 1.00 | 0.00 | N |
| ATOM | 2661 | HH11 | ARG | 170 | 24.179 | 19.182 | 35.898 | 1.00 | 0.00 | H |
| ATOM | 2662 | HH12 | ARG | 170 | 25.223 | 20.536 | 36.260 | 1.00 | 0.00 | H |
| ATOM | 2663 | NH2  | ARG | 170 | 22.556 | 20.471 | 34.502 | 1.00 | 0.00 | N |
| ATOM | 2664 | HH21 | ARG | 170 | 21.955 | 21.086 | 33.975 | 1.00 | 0.00 | H |
| ATOM | 2665 | HH22 | ARG | 170 | 22.322 | 19.494 | 34.592 | 1.00 | 0.00 | H |
| ATOM | 2666 | C    | ARG | 170 | 27.930 | 27.026 | 36.214 | 1.00 | 0.00 | C |
| ATOM | 2667 | O    | ARG | 170 | 28.270 | 26.318 | 37.209 | 1.00 | 0.00 | O |
| ATOM | 2668 | N    | ALA | 171 | 28.594 | 28.065 | 35.743 | 1.00 | 0.00 | N |

|      |      |      |     |     |        |        |        |      |      |   |
|------|------|------|-----|-----|--------|--------|--------|------|------|---|
| ATOM | 2669 | H    | ALA | 171 | 28.194 | 28.519 | 34.934 | 1.00 | 0.00 | H |
| ATOM | 2670 | CA   | ALA | 171 | 29.854 | 28.639 | 36.192 | 1.00 | 0.00 | C |
| ATOM | 2671 | HA   | ALA | 171 | 30.048 | 29.470 | 35.514 | 1.00 | 0.00 | H |
| ATOM | 2672 | CB   | ALA | 171 | 29.530 | 29.262 | 37.548 | 1.00 | 0.00 | C |
| ATOM | 2673 | HB1  | ALA | 171 | 30.380 | 29.851 | 37.895 | 1.00 | 0.00 | H |
| ATOM | 2674 | HB2  | ALA | 171 | 28.689 | 29.940 | 37.440 | 1.00 | 0.00 | H |
| ATOM | 2675 | HB3  | ALA | 171 | 29.304 | 28.498 | 38.293 | 1.00 | 0.00 | H |
| ATOM | 2676 | C    | ALA | 171 | 31.170 | 27.814 | 36.210 | 1.00 | 0.00 | C |
| ATOM | 2677 | O    | ALA | 171 | 31.987 | 27.923 | 37.106 | 1.00 | 0.00 | O |
| ATOM | 2678 | N    | VAL | 172 | 31.317 | 26.876 | 35.277 | 1.00 | 0.00 | N |
| ATOM | 2679 | H    | VAL | 172 | 30.582 | 26.771 | 34.591 | 1.00 | 0.00 | H |
| ATOM | 2680 | CA   | VAL | 172 | 32.503 | 25.984 | 35.126 | 1.00 | 0.00 | C |
| ATOM | 2681 | HA   | VAL | 172 | 32.843 | 25.675 | 36.109 | 1.00 | 0.00 | H |
| ATOM | 2682 | CB   | VAL | 172 | 32.129 | 24.721 | 34.329 | 1.00 | 0.00 | C |
| ATOM | 2683 | HB   | VAL | 172 | 31.743 | 25.012 | 33.350 | 1.00 | 0.00 | H |
| ATOM | 2684 | CG1  | VAL | 172 | 33.351 | 23.839 | 34.124 | 1.00 | 0.00 | C |
| ATOM | 2685 | HG11 | VAL | 172 | 33.039 | 22.882 | 33.705 | 1.00 | 0.00 | H |
| ATOM | 2686 | HG12 | VAL | 172 | 34.046 | 24.290 | 33.417 | 1.00 | 0.00 | H |
| ATOM | 2687 | HG13 | VAL | 172 | 33.852 | 23.657 | 35.076 | 1.00 | 0.00 | H |
| ATOM | 2688 | CG2  | VAL | 172 | 31.029 | 23.959 | 35.053 | 1.00 | 0.00 | C |
| ATOM | 2689 | HG21 | VAL | 172 | 30.678 | 23.145 | 34.418 | 1.00 | 0.00 | H |
| ATOM | 2690 | HG22 | VAL | 172 | 31.414 | 23.530 | 35.975 | 1.00 | 0.00 | H |
| ATOM | 2691 | HG23 | VAL | 172 | 30.176 | 24.594 | 35.284 | 1.00 | 0.00 | H |
| ATOM | 2692 | C    | VAL | 172 | 33.665 | 26.651 | 34.431 | 1.00 | 0.00 | C |
| ATOM | 2693 | O    | VAL | 172 | 33.523 | 26.976 | 33.253 | 1.00 | 0.00 | O |
| ATOM | 2694 | N    | THR | 173 | 34.868 | 26.855 | 35.036 | 1.00 | 0.00 | N |
| ATOM | 2695 | H    | THR | 173 | 34.966 | 26.573 | 36.000 | 1.00 | 0.00 | H |
| ATOM | 2696 | CA   | THR | 173 | 36.008 | 27.513 | 34.424 | 1.00 | 0.00 | C |
| ATOM | 2697 | HA   | THR | 173 | 36.695 | 27.773 | 35.229 | 1.00 | 0.00 | H |
| ATOM | 2698 | CB   | THR | 173 | 36.717 | 26.484 | 33.524 | 1.00 | 0.00 | C |

|      |      |      |     |     |        |        |        |      |      |   |
|------|------|------|-----|-----|--------|--------|--------|------|------|---|
| ATOM | 2699 | HB   | THR | 173 | 37.646 | 26.914 | 33.148 | 1.00 | 0.00 | H |
| ATOM | 2700 | CG2  | THR | 173 | 37.050 | 25.226 | 34.312 | 1.00 | 0.00 | C |
| ATOM | 2701 | HG21 | THR | 173 | 37.729 | 24.628 | 33.710 | 1.00 | 0.00 | H |
| ATOM | 2702 | HG22 | THR | 173 | 37.552 | 25.494 | 35.242 | 1.00 | 0.00 | H |
| ATOM | 2703 | HG23 | THR | 173 | 36.160 | 24.638 | 34.532 | 1.00 | 0.00 | H |
| ATOM | 2704 | OG1  | THR | 173 | 35.867 | 26.143 | 32.422 | 1.00 | 0.00 | O |
| ATOM | 2705 | HG1  | THR | 173 | 35.701 | 26.955 | 31.933 | 1.00 | 0.00 | H |
| ATOM | 2706 | C    | THR | 173 | 35.759 | 28.840 | 33.593 | 1.00 | 0.00 | C |
| ATOM | 2707 | O    | THR | 173 | 36.279 | 28.985 | 32.468 | 1.00 | 0.00 | O |
| ATOM | 2708 | N    | THR | 174 | 34.878 | 29.684 | 34.181 | 1.00 | 0.00 | N |
| ATOM | 2709 | H    | THR | 174 | 34.492 | 29.436 | 35.081 | 1.00 | 0.00 | H |
| ATOM | 2710 | CA   | THR | 174 | 34.448 | 30.954 | 33.616 | 1.00 | 0.00 | C |
| ATOM | 2711 | HA   | THR | 174 | 35.240 | 31.322 | 32.963 | 1.00 | 0.00 | H |
| ATOM | 2712 | CB   | THR | 174 | 33.179 | 30.774 | 32.763 | 1.00 | 0.00 | C |
| ATOM | 2713 | HB   | THR | 174 | 33.364 | 30.020 | 31.998 | 1.00 | 0.00 | H |
| ATOM | 2714 | CG2  | THR | 174 | 32.012 | 30.328 | 33.630 | 1.00 | 0.00 | C |
| ATOM | 2715 | HG21 | THR | 174 | 31.155 | 30.122 | 32.989 | 1.00 | 0.00 | H |
| ATOM | 2716 | HG22 | THR | 174 | 32.262 | 29.412 | 34.160 | 1.00 | 0.00 | H |
| ATOM | 2717 | HG23 | THR | 174 | 31.727 | 31.099 | 34.346 | 1.00 | 0.00 | H |
| ATOM | 2718 | OG1  | THR | 174 | 32.849 | 32.015 | 32.125 | 1.00 | 0.00 | O |
| ATOM | 2719 | HG1  | THR | 174 | 33.535 | 32.221 | 31.486 | 1.00 | 0.00 | H |
| ATOM | 2720 | C    | THR | 174 | 34.183 | 32.003 | 34.631 | 1.00 | 0.00 | C |
| ATOM | 2721 | O    | THR | 174 | 34.068 | 31.717 | 35.816 | 1.00 | 0.00 | O |
| ATOM | 2722 | N    | CYS | 175 | 34.225 | 33.330 | 34.309 | 1.00 | 0.00 | N |
| ATOM | 2723 | H    | CYS | 175 | 34.400 | 33.557 | 33.342 | 1.00 | 0.00 | H |
| ATOM | 2724 | CA   | CYS | 175 | 33.965 | 34.461 | 35.149 | 1.00 | 0.00 | C |
| ATOM | 2725 | HA   | CYS | 175 | 33.044 | 34.248 | 35.690 | 1.00 | 0.00 | H |
| ATOM | 2726 | CB   | CYS | 175 | 35.091 | 34.556 | 36.179 | 1.00 | 0.00 | C |
| ATOM | 2727 | HB2  | CYS | 175 | 34.954 | 35.458 | 36.767 | 1.00 | 0.00 | H |
| ATOM | 2728 | HB3  | CYS | 175 | 35.027 | 33.716 | 36.868 | 1.00 | 0.00 | H |

|      |      |      |     |     |        |        |        |      |      |   |
|------|------|------|-----|-----|--------|--------|--------|------|------|---|
| ATOM | 2729 | SG   | CYS | 175 | 36.751 | 34.559 | 35.461 | 1.00 | 0.00 | S |
| ATOM | 2730 | HG   | CYS | 175 | 36.647 | 35.752 | 34.839 | 1.00 | 0.00 | H |
| ATOM | 2731 | C    | CYS | 175 | 33.808 | 35.821 | 34.537 | 1.00 | 0.00 | C |
| ATOM | 2732 | O    | CYS | 175 | 34.429 | 36.139 | 33.493 | 1.00 | 0.00 | O |
| ATOM | 2733 | N    | THR | 176 | 33.104 | 36.766 | 35.262 | 1.00 | 0.00 | N |
| ATOM | 2734 | H    | THR | 176 | 32.684 | 36.460 | 36.129 | 1.00 | 0.00 | H |
| ATOM | 2735 | CA   | THR | 176 | 32.906 | 38.232 | 34.928 | 1.00 | 0.00 | C |
| ATOM | 2736 | HA   | THR | 176 | 33.686 | 38.515 | 34.220 | 1.00 | 0.00 | H |
| ATOM | 2737 | CB   | THR | 176 | 31.547 | 38.447 | 34.237 | 1.00 | 0.00 | C |
| ATOM | 2738 | HB   | THR | 176 | 30.744 | 38.168 | 34.918 | 1.00 | 0.00 | H |
| ATOM | 2739 | CG2  | THR | 176 | 31.375 | 39.906 | 33.841 | 1.00 | 0.00 | C |
| ATOM | 2740 | HG21 | THR | 176 | 31.279 | 40.543 | 34.714 | 1.00 | 0.00 | H |
| ATOM | 2741 | HG22 | THR | 176 | 32.226 | 40.235 | 33.243 | 1.00 | 0.00 | H |
| ATOM | 2742 | HG23 | THR | 176 | 30.465 | 40.013 | 33.249 | 1.00 | 0.00 | H |
| ATOM | 2743 | OG1  | THR | 176 | 31.469 | 37.626 | 33.064 | 1.00 | 0.00 | O |
| ATOM | 2744 | HG1  | THR | 176 | 31.498 | 36.707 | 33.341 | 1.00 | 0.00 | H |
| ATOM | 2745 | C    | THR | 176 | 32.988 | 39.208 | 36.122 | 1.00 | 0.00 | C |
| ATOM | 2746 | O    | THR | 176 | 32.286 | 39.041 | 37.152 | 1.00 | 0.00 | O |
| ATOM | 2747 | N    | LEU | 177 | 33.682 | 40.316 | 36.000 | 1.00 | 0.00 | N |
| ATOM | 2748 | H    | LEU | 177 | 34.178 | 40.458 | 35.132 | 1.00 | 0.00 | H |
| ATOM | 2749 | CA   | LEU | 177 | 33.808 | 41.413 | 37.006 | 1.00 | 0.00 | C |
| ATOM | 2750 | HA   | LEU | 177 | 32.867 | 41.499 | 37.549 | 1.00 | 0.00 | H |
| ATOM | 2751 | CB   | LEU | 177 | 34.929 | 41.115 | 38.010 | 1.00 | 0.00 | C |
| ATOM | 2752 | HB2  | LEU | 177 | 34.656 | 40.226 | 38.581 | 1.00 | 0.00 | H |
| ATOM | 2753 | HB3  | LEU | 177 | 35.828 | 40.891 | 37.436 | 1.00 | 0.00 | H |
| ATOM | 2754 | CG   | LEU | 177 | 35.278 | 42.255 | 38.975 | 1.00 | 0.00 | C |
| ATOM | 2755 | HG   | LEU | 177 | 35.578 | 43.144 | 38.423 | 1.00 | 0.00 | H |
| ATOM | 2756 | CD1  | LEU | 177 | 34.059 | 42.595 | 39.822 | 1.00 | 0.00 | C |
| ATOM | 2757 | HD11 | LEU | 177 | 34.348 | 43.279 | 40.618 | 1.00 | 0.00 | H |
| ATOM | 2758 | HD12 | LEU | 177 | 33.296 | 43.086 | 39.225 | 1.00 | 0.00 | H |

|      |      |      |     |     |        |        |        |      |      |   |
|------|------|------|-----|-----|--------|--------|--------|------|------|---|
| ATOM | 2759 | HD13 | LEU | 177 | 33.635 | 41.694 | 40.253 | 1.00 | 0.00 | H |
| ATOM | 2760 | CD2  | LEU | 177 | 36.452 | 41.839 | 39.849 | 1.00 | 0.00 | C |
| ATOM | 2761 | HD21 | LEU | 177 | 36.642 | 42.602 | 40.604 | 1.00 | 0.00 | H |
| ATOM | 2762 | HD22 | LEU | 177 | 36.239 | 40.895 | 40.347 | 1.00 | 0.00 | H |
| ATOM | 2763 | HD23 | LEU | 177 | 37.343 | 41.728 | 39.238 | 1.00 | 0.00 | H |
| ATOM | 2764 | C    | LEU | 177 | 34.096 | 42.735 | 36.278 | 1.00 | 0.00 | C |
| ATOM | 2765 | O    | LEU | 177 | 34.888 | 42.895 | 35.364 | 1.00 | 0.00 | O |
| ATOM | 2766 | N    | THR | 178 | 33.346 | 43.761 | 36.662 | 1.00 | 0.00 | N |
| ATOM | 2767 | H    | THR | 178 | 32.628 | 43.580 | 37.349 | 1.00 | 0.00 | H |
| ATOM | 2768 | CA   | THR | 178 | 33.586 | 45.199 | 36.330 | 1.00 | 0.00 | C |
| ATOM | 2769 | HA   | THR | 178 | 34.616 | 45.307 | 35.989 | 1.00 | 0.00 | H |
| ATOM | 2770 | CB   | THR | 178 | 32.660 | 45.662 | 35.191 | 1.00 | 0.00 | C |
| ATOM | 2771 | HB   | THR | 178 | 32.921 | 46.682 | 34.906 | 1.00 | 0.00 | H |
| ATOM | 2772 | CG2  | THR | 178 | 32.812 | 44.757 | 33.978 | 1.00 | 0.00 | C |
| ATOM | 2773 | HG21 | THR | 178 | 32.238 | 45.184 | 33.155 | 1.00 | 0.00 | H |
| ATOM | 2774 | HG22 | THR | 178 | 33.858 | 44.710 | 33.674 | 1.00 | 0.00 | H |
| ATOM | 2775 | HG23 | THR | 178 | 32.432 | 43.754 | 34.175 | 1.00 | 0.00 | H |
| ATOM | 2776 | OG1  | THR | 178 | 31.297 | 45.633 | 35.636 | 1.00 | 0.00 | O |
| ATOM | 2777 | HG1  | THR | 178 | 31.183 | 46.285 | 36.334 | 1.00 | 0.00 | H |
| ATOM | 2778 | C    | THR | 178 | 33.408 | 46.152 | 37.489 | 1.00 | 0.00 | C |
| ATOM | 2779 | O    | THR | 178 | 33.882 | 47.282 | 37.386 | 1.00 | 0.00 | O |
| ATOM | 2780 | N    | GLU | 179 | 32.580 | 45.742 | 38.433 | 1.00 | 0.00 | N |
| ATOM | 2781 | H    | GLU | 179 | 32.154 | 44.827 | 38.394 | 1.00 | 0.00 | H |
| ATOM | 2782 | CA   | GLU | 179 | 32.258 | 46.625 | 39.536 | 1.00 | 0.00 | C |
| ATOM | 2783 | HA   | GLU | 179 | 31.907 | 47.580 | 39.140 | 1.00 | 0.00 | H |
| ATOM | 2784 | CB   | GLU | 179 | 31.138 | 46.025 | 40.389 | 1.00 | 0.00 | C |
| ATOM | 2785 | HB2  | GLU | 179 | 31.409 | 45.001 | 40.639 | 1.00 | 0.00 | H |
| ATOM | 2786 | HB3  | GLU | 179 | 31.069 | 46.583 | 41.316 | 1.00 | 0.00 | H |
| ATOM | 2787 | CG   | GLU | 179 | 29.774 | 46.008 | 39.713 | 1.00 | 0.00 | C |
| ATOM | 2788 | HG2  | GLU | 179 | 29.851 | 45.525 | 38.739 | 1.00 | 0.00 | H |



|      |      |      |     |     |        |        |        |      |      |   |
|------|------|------|-----|-----|--------|--------|--------|------|------|---|
| ATOM | 2789 | HG3  | GLU | 179 | 29.093 | 45.417 | 40.327 | 1.00 | 0.00 | H |
| ATOM | 2790 | CD   | GLU | 179 | 29.186 | 47.381 | 39.548 | 1.00 | 0.00 | C |
| ATOM | 2791 | OE1  | GLU | 179 | 29.141 | 48.107 | 40.512 | 1.00 | 0.00 | O |
| ATOM | 2792 | OE2  | GLU | 179 | 28.781 | 47.705 | 38.456 | 1.00 | 0.00 | O |
| ATOM | 2793 | C    | GLU | 179 | 33.503 | 46.882 | 40.395 | 1.00 | 0.00 | C |
| ATOM | 2794 | O    | GLU | 179 | 34.451 | 46.072 | 40.386 | 1.00 | 0.00 | O |
| ATOM | 2795 | N    | ASN | 180 | 33.550 | 47.988 | 41.062 | 1.00 | 0.00 | N |
| ATOM | 2796 | H    | ASN | 180 | 32.762 | 48.620 | 41.035 | 1.00 | 0.00 | H |
| ATOM | 2797 | CA   | ASN | 180 | 34.778 | 48.424 | 41.801 | 1.00 | 0.00 | C |
| ATOM | 2798 | HA   | ASN | 180 | 35.641 | 48.066 | 41.248 | 1.00 | 0.00 | H |
| ATOM | 2799 | CB   | ASN | 180 | 34.864 | 49.939 | 41.774 | 1.00 | 0.00 | C |
| ATOM | 2800 | HB2  | ASN | 180 | 35.801 | 50.266 | 42.225 | 1.00 | 0.00 | H |
| ATOM | 2801 | HB3  | ASN | 180 | 34.863 | 50.274 | 40.735 | 1.00 | 0.00 | H |
| ATOM | 2802 | CG   | ASN | 180 | 33.726 | 50.595 | 42.506 | 1.00 | 0.00 | C |
| ATOM | 2803 | OD1  | ASN | 180 | 33.263 | 51.705 | 41.990 | 1.00 | 0.00 | O |
| ATOM | 2804 | ND2  | ASN | 180 | 33.266 | 50.096 | 43.539 | 1.00 | 0.00 | N |
| ATOM | 2805 | HD21 | ASN | 180 | 32.461 | 50.531 | 43.962 | 1.00 | 0.00 | H |
| ATOM | 2806 | HD22 | ASN | 180 | 33.662 | 49.265 | 43.946 | 1.00 | 0.00 | H |
| ATOM | 2807 | C    | ASN | 180 | 34.908 | 47.926 | 43.276 | 1.00 | 0.00 | C |
| ATOM | 2808 | O    | ASN | 180 | 33.943 | 47.386 | 43.840 | 1.00 | 0.00 | O |
| ATOM | 2809 | N    | MET | 181 | 36.128 | 48.134 | 43.805 | 1.00 | 0.00 | N |
| ATOM | 2810 | H    | MET | 181 | 36.832 | 48.541 | 43.203 | 1.00 | 0.00 | H |
| ATOM | 2811 | CA   | MET | 181 | 36.501 | 47.976 | 45.140 | 1.00 | 0.00 | C |
| ATOM | 2812 | HA   | MET | 181 | 35.811 | 48.538 | 45.772 | 1.00 | 0.00 | H |
| ATOM | 2813 | CB   | MET | 181 | 36.452 | 46.504 | 45.545 | 1.00 | 0.00 | C |
| ATOM | 2814 | HB2  | MET | 181 | 36.742 | 46.444 | 46.594 | 1.00 | 0.00 | H |
| ATOM | 2815 | HB3  | MET | 181 | 35.432 | 46.139 | 45.479 | 1.00 | 0.00 | H |
| ATOM | 2816 | CG   | MET | 181 | 37.393 | 45.603 | 44.758 | 1.00 | 0.00 | C |
| ATOM | 2817 | HG2  | MET | 181 | 37.157 | 45.696 | 43.703 | 1.00 | 0.00 | H |
| ATOM | 2818 | HG3  | MET | 181 | 38.427 | 45.910 | 44.918 | 1.00 | 0.00 | H |

|      |      |      |     |     |        |        |        |      |      |   |
|------|------|------|-----|-----|--------|--------|--------|------|------|---|
| ATOM | 2819 | SD   | MET | 181 | 37.214 | 43.861 | 45.193 | 1.00 | 0.00 | S |
| ATOM | 2820 | CE   | MET | 181 | 37.852 | 43.862 | 46.866 | 1.00 | 0.00 | C |
| ATOM | 2821 | HE1  | MET | 181 | 37.056 | 44.124 | 47.560 | 1.00 | 0.00 | H |
| ATOM | 2822 | HE2  | MET | 181 | 38.213 | 42.863 | 47.097 | 1.00 | 0.00 | H |
| ATOM | 2823 | HE3  | MET | 181 | 38.668 | 44.578 | 46.956 | 1.00 | 0.00 | H |
| ATOM | 2824 | C    | MET | 181 | 37.879 | 48.556 | 45.287 | 1.00 | 0.00 | C |
| ATOM | 2825 | O    | MET | 181 | 38.663 | 48.850 | 44.317 | 1.00 | 0.00 | O |
| ATOM | 2826 | N    | THR | 182 | 38.284 | 48.848 | 46.532 | 1.00 | 0.00 | N |
| ATOM | 2827 | H    | THR | 182 | 37.700 | 48.665 | 47.337 | 1.00 | 0.00 | H |
| ATOM | 2828 | CA   | THR | 182 | 39.669 | 49.267 | 46.716 | 1.00 | 0.00 | C |
| ATOM | 2829 | HA   | THR | 182 | 40.253 | 49.275 | 45.797 | 1.00 | 0.00 | H |
| ATOM | 2830 | CB   | THR | 182 | 39.776 | 50.679 | 47.322 | 1.00 | 0.00 | C |
| ATOM | 2831 | HB   | THR | 182 | 39.226 | 50.717 | 48.264 | 1.00 | 0.00 | H |
| ATOM | 2832 | CG2  | THR | 182 | 41.230 | 51.037 | 47.586 | 1.00 | 0.00 | C |
| ATOM | 2833 | HG21 | THR | 182 | 41.292 | 52.067 | 47.930 | 1.00 | 0.00 | H |
| ATOM | 2834 | HG22 | THR | 182 | 41.617 | 50.387 | 48.361 | 1.00 | 0.00 | H |
| ATOM | 2835 | HG23 | THR | 182 | 41.824 | 50.922 | 46.679 | 1.00 | 0.00 | H |
| ATOM | 2836 | OG1  | THR | 182 | 39.208 | 51.634 | 46.416 | 1.00 | 0.00 | O |
| ATOM | 2837 | HG1  | THR | 182 | 38.253 | 51.525 | 46.408 | 1.00 | 0.00 | H |
| ATOM | 2838 | C    | THR | 182 | 40.323 | 48.227 | 47.634 | 1.00 | 0.00 | C |
| ATOM | 2839 | O    | THR | 182 | 39.769 | 47.917 | 48.661 | 1.00 | 0.00 | O |
| ATOM | 2840 | N    | ILE | 183 | 41.474 | 47.620 | 47.258 | 1.00 | 0.00 | N |
| ATOM | 2841 | H    | ILE | 183 | 41.884 | 47.884 | 46.373 | 1.00 | 0.00 | H |
| ATOM | 2842 | CA   | ILE | 183 | 42.165 | 46.608 | 48.002 | 1.00 | 0.00 | C |
| ATOM | 2843 | HA   | ILE | 183 | 41.486 | 45.773 | 48.175 | 1.00 | 0.00 | H |
| ATOM | 2844 | CB   | ILE | 183 | 43.382 | 46.106 | 47.203 | 1.00 | 0.00 | C |
| ATOM | 2845 | HB   | ILE | 183 | 43.763 | 46.914 | 46.574 | 1.00 | 0.00 | H |
| ATOM | 2846 | CG2  | ILE | 183 | 44.507 | 45.704 | 48.145 | 1.00 | 0.00 | C |
| ATOM | 2847 | HG21 | ILE | 183 | 45.314 | 45.266 | 47.557 | 1.00 | 0.00 | H |
| ATOM | 2848 | HG22 | ILE | 183 | 44.944 | 46.558 | 48.664 | 1.00 | 0.00 | H |

|      |      |      |     |     |        |        |        |      |      |   |
|------|------|------|-----|-----|--------|--------|--------|------|------|---|
| ATOM | 2849 | HG23 | ILE | 183 | 44.168 | 44.948 | 48.847 | 1.00 | 0.00 | H |
| ATOM | 2850 | CG1  | ILE | 183 | 42.985 | 44.932 | 46.305 | 1.00 | 0.00 | C |
| ATOM | 2851 | HG12 | ILE | 183 | 43.839 | 44.663 | 45.688 | 1.00 | 0.00 | H |
| ATOM | 2852 | HG13 | ILE | 183 | 42.737 | 44.069 | 46.925 | 1.00 | 0.00 | H |
| ATOM | 2853 | CD1  | ILE | 183 | 41.805 | 45.223 | 45.406 | 1.00 | 0.00 | C |
| ATOM | 2854 | HD11 | ILE | 183 | 41.692 | 44.405 | 44.694 | 1.00 | 0.00 | H |
| ATOM | 2855 | HD12 | ILE | 183 | 40.882 | 45.297 | 45.980 | 1.00 | 0.00 | H |
| ATOM | 2856 | HD13 | ILE | 183 | 41.976 | 46.145 | 44.848 | 1.00 | 0.00 | H |
| ATOM | 2857 | C    | ILE | 183 | 42.614 | 47.123 | 49.390 | 1.00 | 0.00 | C |
| ATOM | 2858 | O    | ILE | 183 | 42.335 | 46.504 | 50.405 | 1.00 | 0.00 | O |
| ATOM | 2859 | N    | ALA | 184 | 43.084 | 48.361 | 49.377 | 1.00 | 0.00 | N |
| ATOM | 2860 | H    | ALA | 184 | 43.216 | 48.812 | 48.484 | 1.00 | 0.00 | H |
| ATOM | 2861 | CA   | ALA | 184 | 43.457 | 49.108 | 50.540 | 1.00 | 0.00 | C |
| ATOM | 2862 | HA   | ALA | 184 | 44.273 | 48.581 | 51.032 | 1.00 | 0.00 | H |
| ATOM | 2863 | CB   | ALA | 184 | 43.992 | 50.468 | 50.018 | 1.00 | 0.00 | C |
| ATOM | 2864 | HB1  | ALA | 184 | 43.190 | 51.088 | 49.632 | 1.00 | 0.00 | H |
| ATOM | 2865 | HB2  | ALA | 184 | 44.469 | 50.999 | 50.843 | 1.00 | 0.00 | H |
| ATOM | 2866 | HB3  | ALA | 184 | 44.732 | 50.298 | 49.243 | 1.00 | 0.00 | H |
| ATOM | 2867 | C    | ALA | 184 | 42.313 | 49.282 | 51.567 | 1.00 | 0.00 | C |
| ATOM | 2868 | O    | ALA | 184 | 42.493 | 49.186 | 52.795 | 1.00 | 0.00 | O |
| ATOM | 2869 | N    | GLY | 185 | 41.021 | 49.454 | 51.136 | 1.00 | 0.00 | N |
| ATOM | 2870 | H    | GLY | 185 | 40.860 | 49.515 | 50.142 | 1.00 | 0.00 | H |
| ATOM | 2871 | CA   | GLY | 185 | 39.790 | 49.431 | 52.011 | 1.00 | 0.00 | C |
| ATOM | 2872 | HA2  | GLY | 185 | 40.030 | 49.903 | 52.965 | 1.00 | 0.00 | H |
| ATOM | 2873 | HA3  | GLY | 185 | 39.037 | 50.049 | 51.523 | 1.00 | 0.00 | H |
| ATOM | 2874 | C    | GLY | 185 | 39.164 | 48.098 | 52.289 | 1.00 | 0.00 | C |
| ATOM | 2875 | O    | GLY | 185 | 38.627 | 47.895 | 53.346 | 1.00 | 0.00 | O |
| ATOM | 2876 | N    | PHE | 186 | 39.432 | 47.079 | 51.444 | 1.00 | 0.00 | N |
| ATOM | 2877 | H    | PHE | 186 | 39.969 | 47.304 | 50.619 | 1.00 | 0.00 | H |
| ATOM | 2878 | CA   | PHE | 186 | 39.042 | 45.715 | 51.561 | 1.00 | 0.00 | C |

|      |      |      |     |     |        |        |        |      |      |   |
|------|------|------|-----|-----|--------|--------|--------|------|------|---|
| ATOM | 2879 | HA   | PHE | 186 | 37.979 | 45.730 | 51.790 | 1.00 | 0.00 | H |
| ATOM | 2880 | CB   | PHE | 186 | 39.299 | 44.979 | 50.245 | 1.00 | 0.00 | C |
| ATOM | 2881 | HB2  | PHE | 186 | 38.821 | 45.530 | 49.435 | 1.00 | 0.00 | H |
| ATOM | 2882 | HB3  | PHE | 186 | 40.369 | 44.945 | 50.048 | 1.00 | 0.00 | H |
| ATOM | 2883 | CG   | PHE | 186 | 38.758 | 43.578 | 50.218 | 1.00 | 0.00 | C |
| ATOM | 2884 | CD1  | PHE | 186 | 37.626 | 43.242 | 50.945 | 1.00 | 0.00 | C |
| ATOM | 2885 | HD1  | PHE | 186 | 37.097 | 43.961 | 51.546 | 1.00 | 0.00 | H |
| ATOM | 2886 | CE1  | PHE | 186 | 37.128 | 41.953 | 50.921 | 1.00 | 0.00 | C |
| ATOM | 2887 | HE1  | PHE | 186 | 36.243 | 41.701 | 51.483 | 1.00 | 0.00 | H |
| ATOM | 2888 | CZ   | PHE | 186 | 37.756 | 40.984 | 50.168 | 1.00 | 0.00 | C |
| ATOM | 2889 | HZ   | PHE | 186 | 37.363 | 39.978 | 50.145 | 1.00 | 0.00 | H |
| ATOM | 2890 | CE2  | PHE | 186 | 38.884 | 41.304 | 49.439 | 1.00 | 0.00 | C |
| ATOM | 2891 | HE2  | PHE | 186 | 39.384 | 40.547 | 48.855 | 1.00 | 0.00 | H |
| ATOM | 2892 | CD2  | PHE | 186 | 39.381 | 42.593 | 49.466 | 1.00 | 0.00 | C |
| ATOM | 2893 | HD2  | PHE | 186 | 40.262 | 42.834 | 48.889 | 1.00 | 0.00 | H |
| ATOM | 2894 | C    | PHE | 186 | 39.793 | 45.039 | 52.702 | 1.00 | 0.00 | C |
| ATOM | 2895 | O    | PHE | 186 | 39.153 | 44.303 | 53.531 | 1.00 | 0.00 | O |
| ATOM | 2896 | N    | LEU | 187 | 41.074 | 45.280 | 52.798 | 1.00 | 0.00 | N |
| ATOM | 2897 | H    | LEU | 187 | 41.530 | 45.890 | 52.133 | 1.00 | 0.00 | H |
| ATOM | 2898 | CA   | LEU | 187 | 41.856 | 44.731 | 53.882 | 1.00 | 0.00 | C |
| ATOM | 2899 | HA   | LEU | 187 | 41.568 | 43.690 | 54.030 | 1.00 | 0.00 | H |
| ATOM | 2900 | CB   | LEU | 187 | 43.343 | 44.767 | 53.510 | 1.00 | 0.00 | C |
| ATOM | 2901 | HB2  | LEU | 187 | 43.568 | 45.699 | 52.986 | 1.00 | 0.00 | H |
| ATOM | 2902 | HB3  | LEU | 187 | 43.917 | 44.788 | 54.438 | 1.00 | 0.00 | H |
| ATOM | 2903 | CG   | LEU | 187 | 43.855 | 43.571 | 52.697 | 1.00 | 0.00 | C |
| ATOM | 2904 | HG   | LEU | 187 | 43.588 | 42.649 | 53.206 | 1.00 | 0.00 | H |
| ATOM | 2905 | CD1  | LEU | 187 | 43.177 | 43.556 | 51.334 | 1.00 | 0.00 | C |
| ATOM | 2906 | HD11 | LEU | 187 | 43.568 | 42.718 | 50.756 | 1.00 | 0.00 | H |
| ATOM | 2907 | HD12 | LEU | 187 | 42.101 | 43.419 | 51.414 | 1.00 | 0.00 | H |
| ATOM | 2908 | HD13 | LEU | 187 | 43.423 | 44.464 | 50.807 | 1.00 | 0.00 | H |

|      |      |      |     |     |        |        |        |      |      |   |
|------|------|------|-----|-----|--------|--------|--------|------|------|---|
| ATOM | 2909 | CD   | LEU | 187 | 45.367 | 43.662 | 52.555 | 1.00 | 0.00 | C |
| ATOM | 2910 | HD21 | LEU | 187 | 45.734 | 42.785 | 52.021 | 1.00 | 0.00 | H |
| ATOM | 2911 | HD22 | LEU | 187 | 45.636 | 44.567 | 52.011 | 1.00 | 0.00 | H |
| ATOM | 2912 | HD23 | LEU | 187 | 45.838 | 43.693 | 53.538 | 1.00 | 0.00 | H |
| ATOM | 2913 | C    | LEU | 187 | 41.609 | 45.509 | 55.210 | 1.00 | 0.00 | C |
| ATOM | 2914 | O    | LEU | 187 | 41.160 | 46.667 | 55.146 | 1.00 | 0.00 | O |
| ATOM | 2915 | N    | PRO | 188 | 41.770 | 44.821 | 56.364 | 1.00 | 0.00 | N |
| ATOM | 2916 | CD   | PRO | 188 | 42.220 | 43.413 | 56.554 | 1.00 | 0.00 | C |
| ATOM | 2917 | HD2  | PRO | 188 | 43.152 | 43.225 | 56.022 | 1.00 | 0.00 | H |
| ATOM | 2918 | HD3  | PRO | 188 | 41.443 | 42.729 | 56.223 | 1.00 | 0.00 | H |
| ATOM | 2919 | CG   | PRO | 188 | 42.438 | 43.280 | 58.038 | 1.00 | 0.00 | C |
| ATOM | 2920 | HG2  | PRO | 188 | 43.456 | 43.565 | 58.298 | 1.00 | 0.00 | H |
| ATOM | 2921 | HG3  | PRO | 188 | 42.237 | 42.259 | 58.355 | 1.00 | 0.00 | H |
| ATOM | 2922 | CB   | PRO | 188 | 41.475 | 44.244 | 58.642 | 1.00 | 0.00 | C |
| ATOM | 2923 | HB2  | PRO | 188 | 41.769 | 44.524 | 59.654 | 1.00 | 0.00 | H |
| ATOM | 2924 | HB3  | PRO | 188 | 40.478 | 43.802 | 58.653 | 1.00 | 0.00 | H |
| ATOM | 2925 | CA   | PRO | 188 | 41.488 | 45.439 | 57.683 | 1.00 | 0.00 | C |
| ATOM | 2926 | HA   | PRO | 188 | 40.521 | 45.943 | 57.688 | 1.00 | 0.00 | H |
| ATOM | 2927 | C    | PRO | 188 | 42.637 | 46.455 | 58.010 | 1.00 | 0.00 | C |
| ATOM | 2928 | O    | PRO | 188 | 43.814 | 46.464 | 57.552 | 1.00 | 0.00 | O |
| ATOM | 2929 | N    | GLN | 189 | 42.368 | 47.310 | 59.015 | 1.00 | 0.00 | N |
| ATOM | 2930 | H    | GLN | 189 | 41.438 | 47.274 | 59.406 | 1.00 | 0.00 | H |
| ATOM | 2931 | CA   | GLN | 189 | 43.290 | 48.293 | 59.649 | 1.00 | 0.00 | C |
| ATOM | 2932 | HA   | GLN | 189 | 44.273 | 48.233 | 59.181 | 1.00 | 0.00 | H |
| ATOM | 2933 | CB   | GLN | 189 | 42.766 | 49.720 | 59.464 | 1.00 | 0.00 | C |
| ATOM | 2934 | HB2  | GLN | 189 | 41.764 | 49.766 | 59.895 | 1.00 | 0.00 | H |
| ATOM | 2935 | HB3  | GLN | 189 | 43.412 | 50.402 | 60.019 | 1.00 | 0.00 | H |
| ATOM | 2936 | CG   | GLN | 189 | 42.718 | 50.182 | 58.018 | 1.00 | 0.00 | C |
| ATOM | 2937 | HG2  | GLN | 189 | 43.724 | 50.146 | 57.598 | 1.00 | 0.00 | H |
| ATOM | 2938 | HG3  | GLN | 189 | 42.077 | 49.510 | 57.445 | 1.00 | 0.00 | H |

|      |      |      |     |     |        |        |        |      |      |   |
|------|------|------|-----|-----|--------|--------|--------|------|------|---|
| ATOM | 2939 | CD   | GLN | 189 | 42.166 | 51.588 | 57.878 | 1.00 | 0.00 | C |
| ATOM | 2940 | OE1  | GLN | 189 | 42.644 | 52.313 | 56.873 | 1.00 | 0.00 | O |
| ATOM | 2941 | NE2  | GLN | 189 | 41.319 | 52.019 | 58.665 | 1.00 | 0.00 | N |
| ATOM | 2942 | HE21 | GLN | 189 | 40.998 | 51.441 | 59.426 | 1.00 | 0.00 | H |
| ATOM | 2943 | HE22 | GLN | 189 | 40.956 | 52.951 | 58.533 | 1.00 | 0.00 | H |
| ATOM | 2944 | C    | GLN | 189 | 43.467 | 47.979 | 61.164 | 1.00 | 0.00 | C |
| ATOM | 2945 | O    | GLN | 189 | 42.831 | 48.512 | 62.052 | 1.00 | 0.00 | O |
| ATOM | 2946 | N    | SER | 190 | 44.230 | 46.925 | 61.501 | 1.00 | 0.00 | N |
| ATOM | 2947 | H    | SER | 190 | 44.720 | 46.461 | 60.749 | 1.00 | 0.00 | H |
| ATOM | 2948 | CA   | SER | 190 | 44.442 | 46.334 | 62.871 | 1.00 | 0.00 | C |
| ATOM | 2949 | HA   | SER | 190 | 43.481 | 46.320 | 63.387 | 1.00 | 0.00 | H |
| ATOM | 2950 | CB   | SER | 190 | 44.938 | 44.905 | 62.763 | 1.00 | 0.00 | C |
| ATOM | 2951 | HB2  | SER | 190 | 44.797 | 44.409 | 63.723 | 1.00 | 0.00 | H |
| ATOM | 2952 | HB3  | SER | 190 | 44.360 | 44.367 | 62.011 | 1.00 | 0.00 | H |
| ATOM | 2953 | OG   | SER | 190 | 46.297 | 44.869 | 62.424 | 1.00 | 0.00 | O |
| ATOM | 2954 | HG   | SER | 190 | 46.669 | 45.751 | 62.523 | 1.00 | 0.00 | H |
| ATOM | 2955 | C    | SER | 190 | 45.429 | 47.125 | 63.706 | 1.00 | 0.00 | C |
| ATOM | 2956 | O    | SER | 190 | 46.315 | 47.827 | 63.162 | 1.00 | 0.00 | O |
| ATOM | 2957 | N    | GLY | 191 | 45.531 | 46.755 | 64.974 | 1.00 | 0.00 | N |
| ATOM | 2958 | H    | GLY | 191 | 44.877 | 46.096 | 65.370 | 1.00 | 0.00 | H |
| ATOM | 2959 | CA   | GLY | 191 | 46.516 | 47.375 | 65.845 | 1.00 | 0.00 | C |
| ATOM | 2960 | HA2  | GLY | 191 | 46.626 | 48.429 | 65.584 | 1.00 | 0.00 | H |
| ATOM | 2961 | HA3  | GLY | 191 | 46.131 | 47.328 | 66.863 | 1.00 | 0.00 | H |
| ATOM | 2962 | C    | GLY | 191 | 47.884 | 46.729 | 65.841 | 1.00 | 0.00 | C |
| ATOM | 2963 | O    | GLY | 191 | 48.755 | 47.321 | 66.501 | 1.00 | 0.00 | O |
| ATOM | 2964 | N    | SER | 192 | 48.181 | 45.664 | 65.080 | 1.00 | 0.00 | N |
| ATOM | 2965 | H    | SER | 192 | 47.467 | 45.248 | 64.500 | 1.00 | 0.00 | H |
| ATOM | 2966 | CA   | SER | 192 | 49.499 | 45.011 | 65.118 | 1.00 | 0.00 | C |
| ATOM | 2967 | HA   | SER | 192 | 50.261 | 45.792 | 65.115 | 1.00 | 0.00 | H |
| ATOM | 2968 | CB   | SER | 192 | 49.633 | 44.236 | 66.414 | 1.00 | 0.00 | C |

|      |      |     |     |     |        |        |        |      |      |   |
|------|------|-----|-----|-----|--------|--------|--------|------|------|---|
| ATOM | 2969 | HB2 | SER | 192 | 49.537 | 44.916 | 67.261 | 1.00 | 0.00 | H |
| ATOM | 2970 | HB3 | SER | 192 | 48.860 | 43.478 | 66.485 | 1.00 | 0.00 | H |
| ATOM | 2971 | OG  | SER | 192 | 50.878 | 43.598 | 66.492 | 1.00 | 0.00 | O |
| ATOM | 2972 | HG  | SER | 192 | 50.896 | 42.866 | 65.870 | 1.00 | 0.00 | H |
| ATOM | 2973 | C   | SER | 192 | 49.805 | 44.072 | 63.967 | 1.00 | 0.00 | C |
| ATOM | 2974 | O   | SER | 192 | 48.951 | 43.438 | 63.383 | 1.00 | 0.00 | O |
| ATOM | 2975 | N   | TYR | 193 | 51.159 | 43.963 | 63.606 | 1.00 | 0.00 | N |
| ATOM | 2976 | H   | TYR | 193 | 51.851 | 44.480 | 64.130 | 1.00 | 0.00 | H |
| ATOM | 2977 | CA  | TYR | 193 | 51.647 | 43.126 | 62.456 | 1.00 | 0.00 | C |
| ATOM | 2978 | HA  | TYR | 193 | 50.803 | 42.603 | 62.007 | 1.00 | 0.00 | H |
| ATOM | 2979 | CB  | TYR | 193 | 52.273 | 44.012 | 61.377 | 1.00 | 0.00 | C |
| ATOM | 2980 | HB2 | TYR | 193 | 53.017 | 44.662 | 61.834 | 1.00 | 0.00 | H |
| ATOM | 2981 | HB3 | TYR | 193 | 52.785 | 43.376 | 60.654 | 1.00 | 0.00 | H |
| ATOM | 2982 | CG  | TYR | 193 | 51.272 | 44.871 | 60.636 | 1.00 | 0.00 | C |
| ATOM | 2983 | CD1 | TYR | 193 | 50.737 | 45.995 | 61.247 | 1.00 | 0.00 | C |
| ATOM | 2984 | HD1 | TYR | 193 | 51.032 | 46.272 | 62.249 | 1.00 | 0.00 | H |
| ATOM | 2985 | CE1 | TYR | 193 | 49.823 | 46.780 | 60.571 | 1.00 | 0.00 | C |
| ATOM | 2986 | HE1 | TYR | 193 | 49.415 | 47.664 | 61.040 | 1.00 | 0.00 | H |
| ATOM | 2987 | CZ  | TYR | 193 | 49.444 | 46.438 | 59.278 | 1.00 | 0.00 | C |
| ATOM | 2988 | OH  | TYR | 193 | 48.534 | 47.220 | 58.604 | 1.00 | 0.00 | O |
| ATOM | 2989 | HH  | TYR | 193 | 48.528 | 47.031 | 57.661 | 1.00 | 0.00 | H |
| ATOM | 2990 | CE2 | TYR | 193 | 49.976 | 45.319 | 58.670 | 1.00 | 0.00 | C |
| ATOM | 2991 | HE2 | TYR | 193 | 49.676 | 45.050 | 57.669 | 1.00 | 0.00 | H |
| ATOM | 2992 | CD2 | TYR | 193 | 50.890 | 44.535 | 59.346 | 1.00 | 0.00 | C |
| ATOM | 2993 | HD2 | TYR | 193 | 51.302 | 43.662 | 58.866 | 1.00 | 0.00 | H |
| ATOM | 2994 | C   | TYR | 193 | 52.677 | 42.045 | 62.935 | 1.00 | 0.00 | C |
| ATOM | 2995 | O   | TYR | 193 | 53.453 | 42.251 | 63.878 | 1.00 | 0.00 | O |
| ATOM | 2996 | N   | PHE | 194 | 52.714 | 40.924 | 62.243 | 1.00 | 0.00 | N |
| ATOM | 2997 | H   | PHE | 194 | 52.026 | 40.796 | 61.513 | 1.00 | 0.00 | H |
| ATOM | 2998 | CA  | PHE | 194 | 53.791 | 39.844 | 62.349 | 1.00 | 0.00 | C |

|      |      |     |     |     |        |        |        |      |      |   |
|------|------|-----|-----|-----|--------|--------|--------|------|------|---|
| ATOM | 2999 | HA  | PHE | 194 | 54.741 | 40.336 | 62.556 | 1.00 | 0.00 | H |
| ATOM | 3000 | CB  | PHE | 194 | 53.480 | 38.912 | 63.521 | 1.00 | 0.00 | C |
| ATOM | 3001 | HB2 | PHE | 194 | 54.125 | 38.033 | 63.486 | 1.00 | 0.00 | H |
| ATOM | 3002 | HB3 | PHE | 194 | 53.722 | 39.437 | 64.443 | 1.00 | 0.00 | H |
| ATOM | 3003 | CG  | PHE | 194 | 52.044 | 38.477 | 63.585 | 1.00 | 0.00 | C |
| ATOM | 3004 | CD1 | PHE | 194 | 51.616 | 37.345 | 62.908 | 1.00 | 0.00 | C |
| ATOM | 3005 | HD1 | PHE | 194 | 52.305 | 36.805 | 62.287 | 1.00 | 0.00 | H |
| ATOM | 3006 | CE1 | PHE | 194 | 50.294 | 36.944 | 62.966 | 1.00 | 0.00 | C |
| ATOM | 3007 | HE1 | PHE | 194 | 49.975 | 36.061 | 62.432 | 1.00 | 0.00 | H |
| ATOM | 3008 | CZ  | PHE | 194 | 49.384 | 37.672 | 63.704 | 1.00 | 0.00 | C |
| ATOM | 3009 | HZ  | PHE | 194 | 48.354 | 37.355 | 63.766 | 1.00 | 0.00 | H |
| ATOM | 3010 | CE2 | PHE | 194 | 49.796 | 38.801 | 64.383 | 1.00 | 0.00 | C |
| ATOM | 3011 | HE2 | PHE | 194 | 49.100 | 39.358 | 64.979 | 1.00 | 0.00 | H |
| ATOM | 3012 | CD2 | PHE | 194 | 51.117 | 39.200 | 64.322 | 1.00 | 0.00 | C |
| ATOM | 3013 | HD2 | PHE | 194 | 51.431 | 40.073 | 64.875 | 1.00 | 0.00 | H |
| ATOM | 3014 | C   | PHE | 194 | 53.996 | 38.966 | 61.096 | 1.00 | 0.00 | C |
| ATOM | 3015 | O   | PHE | 194 | 53.065 | 38.750 | 60.302 | 1.00 | 0.00 | O |
| ATOM | 3016 | N   | ALA | 195 | 55.209 | 38.370 | 60.930 | 1.00 | 0.00 | N |
| ATOM | 3017 | H   | ALA | 195 | 55.900 | 38.504 | 61.657 | 1.00 | 0.00 | H |
| ATOM | 3018 | CA  | ALA | 195 | 55.680 | 37.778 | 59.722 | 1.00 | 0.00 | C |
| ATOM | 3019 | HA  | ALA | 195 | 54.816 | 37.387 | 59.190 | 1.00 | 0.00 | H |
| ATOM | 3020 | CB  | ALA | 195 | 56.313 | 38.875 | 58.876 | 1.00 | 0.00 | C |
| ATOM | 3021 | HB1 | ALA | 195 | 56.803 | 38.412 | 58.030 | 1.00 | 0.00 | H |
| ATOM | 3022 | HB2 | ALA | 195 | 55.536 | 39.531 | 58.508 | 1.00 | 0.00 | H |
| ATOM | 3023 | HB3 | ALA | 195 | 57.039 | 39.432 | 59.464 | 1.00 | 0.00 | H |
| ATOM | 3024 | C   | ALA | 195 | 56.691 | 36.589 | 59.888 | 1.00 | 0.00 | C |
| ATOM | 3025 | O   | ALA | 195 | 57.239 | 36.279 | 60.934 | 1.00 | 0.00 | O |
| ATOM | 3026 | N   | TYR | 196 | 56.812 | 35.818 | 58.813 | 1.00 | 0.00 | N |
| ATOM | 3027 | H   | TYR | 196 | 56.260 | 36.043 | 57.996 | 1.00 | 0.00 | H |
| ATOM | 3028 | CA  | TYR | 196 | 57.921 | 34.866 | 58.622 | 1.00 | 0.00 | C |



|      |      |      |     |     |        |        |        |      |      |   |
|------|------|------|-----|-----|--------|--------|--------|------|------|---|
| ATOM | 3029 | HA   | TYR | 196 | 58.733 | 35.145 | 59.295 | 1.00 | 0.00 | H |
| ATOM | 3030 | CB   | TYR | 196 | 57.472 | 33.453 | 59.003 | 1.00 | 0.00 | C |
| ATOM | 3031 | HB2  | TYR | 196 | 58.355 | 32.826 | 59.139 | 1.00 | 0.00 | H |
| ATOM | 3032 | HB3  | TYR | 196 | 56.952 | 33.498 | 59.958 | 1.00 | 0.00 | H |
| ATOM | 3033 | CG   | TYR | 196 | 56.561 | 32.807 | 57.983 | 1.00 | 0.00 | C |
| ATOM | 3034 | CD1  | TYR | 196 | 57.093 | 31.992 | 56.995 | 1.00 | 0.00 | C |
| ATOM | 3035 | HD1  | TYR | 196 | 58.157 | 31.818 | 56.948 | 1.00 | 0.00 | H |
| ATOM | 3036 | CE1  | TYR | 196 | 56.261 | 31.401 | 56.064 | 1.00 | 0.00 | C |
| ATOM | 3037 | HE1  | TYR | 196 | 56.672 | 30.757 | 55.300 | 1.00 | 0.00 | H |
| ATOM | 3038 | CZ   | TYR | 196 | 54.891 | 31.627 | 56.123 | 1.00 | 0.00 | C |
| ATOM | 3039 | OH   | TYR | 196 | 54.062 | 31.038 | 55.195 | 1.00 | 0.00 | O |
| ATOM | 3040 | HH   | TYR | 196 | 54.539 | 30.556 | 54.511 | 1.00 | 0.00 | H |
| ATOM | 3041 | CE2  | TYR | 196 | 54.361 | 32.438 | 57.106 | 1.00 | 0.00 | C |
| ATOM | 3042 | HE2  | TYR | 196 | 53.303 | 32.638 | 57.139 | 1.00 | 0.00 | H |
| ATOM | 3043 | CD2  | TYR | 196 | 55.193 | 33.028 | 58.037 | 1.00 | 0.00 | C |
| ATOM | 3044 | HD2  | TYR | 196 | 54.776 | 33.629 | 58.817 | 1.00 | 0.00 | H |
| ATOM | 3045 | C    | TYR | 196 | 58.489 | 34.834 | 57.230 | 1.00 | 0.00 | C |
| ATOM | 3046 | O    | TYR | 196 | 57.884 | 35.311 | 56.300 | 1.00 | 0.00 | O |
| ATOM | 3047 | N    | ASN | 197 | 59.798 | 34.332 | 57.038 | 1.00 | 0.00 | N |
| ATOM | 3048 | H    | ASN | 197 | 60.301 | 33.989 | 57.844 | 1.00 | 0.00 | H |
| ATOM | 3049 | CA   | ASN | 197 | 60.444 | 34.107 | 55.726 | 1.00 | 0.00 | C |
| ATOM | 3050 | HA   | ASN | 197 | 59.902 | 34.666 | 54.964 | 1.00 | 0.00 | H |
| ATOM | 3051 | CB   | ASN | 197 | 61.884 | 34.587 | 55.738 | 1.00 | 0.00 | C |
| ATOM | 3052 | HB2  | ASN | 197 | 62.454 | 34.011 | 56.469 | 1.00 | 0.00 | H |
| ATOM | 3053 | HB3  | ASN | 197 | 62.317 | 34.418 | 54.751 | 1.00 | 0.00 | H |
| ATOM | 3054 | CG   | ASN | 197 | 62.002 | 36.051 | 56.060 | 1.00 | 0.00 | C |
| ATOM | 3055 | OD1  | ASN | 197 | 62.996 | 36.399 | 56.837 | 1.00 | 0.00 | O |
| ATOM | 3056 | ND2  | ASN | 197 | 61.193 | 36.867 | 55.604 | 1.00 | 0.00 | N |
| ATOM | 3057 | HD21 | ASN | 197 | 61.314 | 37.846 | 55.810 | 1.00 | 0.00 | H |
| ATOM | 3058 | HD22 | ASN | 197 | 60.432 | 36.553 | 55.023 | 1.00 | 0.00 | H |

|      |      |     |     |     |        |        |        |      |      |   |
|------|------|-----|-----|-----|--------|--------|--------|------|------|---|
| ATOM | 3059 | C   | ASN | 197 | 60.363 | 32.609 | 55.356 | 1.00 | 0.00 | C |
| ATOM | 3060 | O   | ASN | 197 | 60.782 | 31.826 | 56.187 | 1.00 | 0.00 | O |
| ATOM | 3061 | N   | GLY | 198 | 59.918 | 32.276 | 54.163 | 1.00 | 0.00 | N |
| ATOM | 3062 | H   | GLY | 198 | 59.609 | 33.017 | 53.548 | 1.00 | 0.00 | H |
| ATOM | 3063 | CA  | GLY | 198 | 59.795 | 30.937 | 53.649 | 1.00 | 0.00 | C |
| ATOM | 3064 | HA2 | GLY | 198 | 60.735 | 30.415 | 53.798 | 1.00 | 0.00 | H |
| ATOM | 3065 | HA3 | GLY | 198 | 59.064 | 30.421 | 54.272 | 1.00 | 0.00 | H |
| ATOM | 3066 | C   | GLY | 198 | 59.340 | 30.728 | 52.134 | 1.00 | 0.00 | C |
| ATOM | 3067 | O   | GLY | 198 | 59.507 | 31.618 | 51.337 | 1.00 | 0.00 | O |
| ATOM | 3068 | N   | SER | 199 | 58.966 | 29.486 | 51.743 | 1.00 | 0.00 | N |
| ATOM | 3069 | H   | SER | 199 | 58.933 | 28.771 | 52.456 | 1.00 | 0.00 | H |
| ATOM | 3070 | CA  | SER | 199 | 58.547 | 29.051 | 50.401 | 1.00 | 0.00 | C |
| ATOM | 3071 | HA  | SER | 199 | 59.219 | 29.478 | 49.673 | 1.00 | 0.00 | H |
| ATOM | 3072 | CB  | SER | 199 | 58.661 | 27.542 | 50.315 | 1.00 | 0.00 | C |
| ATOM | 3073 | HB2 | SER | 199 | 58.388 | 27.218 | 49.310 | 1.00 | 0.00 | H |
| ATOM | 3074 | HB3 | SER | 199 | 59.688 | 27.235 | 50.511 | 1.00 | 0.00 | H |
| ATOM | 3075 | OG  | SER | 199 | 57.813 | 26.921 | 51.242 | 1.00 | 0.00 | O |
| ATOM | 3076 | HG  | SER | 199 | 58.246 | 26.949 | 52.102 | 1.00 | 0.00 | H |
| ATOM | 3077 | C   | SER | 199 | 57.100 | 29.487 | 50.014 | 1.00 | 0.00 | C |
| ATOM | 3078 | O   | SER | 199 | 56.267 | 29.810 | 50.850 | 1.00 | 0.00 | O |
| ATOM | 3079 | N   | LEU | 200 | 56.816 | 29.519 | 48.735 | 1.00 | 0.00 | N |
| ATOM | 3080 | H   | LEU | 200 | 57.533 | 29.286 | 48.062 | 1.00 | 0.00 | H |
| ATOM | 3081 | CA  | LEU | 200 | 55.426 | 29.828 | 48.221 | 1.00 | 0.00 | C |
| ATOM | 3082 | HA  | LEU | 200 | 55.053 | 30.738 | 48.687 | 1.00 | 0.00 | H |
| ATOM | 3083 | CB  | LEU | 200 | 55.380 | 29.964 | 46.694 | 1.00 | 0.00 | C |
| ATOM | 3084 | HB2 | LEU | 200 | 55.850 | 29.093 | 46.256 | 1.00 | 0.00 | H |
| ATOM | 3085 | HB3 | LEU | 200 | 54.337 | 29.962 | 46.373 | 1.00 | 0.00 | H |
| ATOM | 3086 | CG  | LEU | 200 | 56.070 | 31.206 | 46.116 | 1.00 | 0.00 | C |
| ATOM | 3087 | HG  | LEU | 200 | 57.069 | 31.297 | 46.542 | 1.00 | 0.00 | H |
| ATOM | 3088 | CD1 | LEU | 200 | 56.209 | 31.054 | 44.607 | 1.00 | 0.00 | C |

|      |      |      |     |     |        |        |        |      |      |   |
|------|------|------|-----|-----|--------|--------|--------|------|------|---|
| ATOM | 3089 | HD11 | LEU | 200 | 56.702 | 31.934 | 44.194 | 1.00 | 0.00 | H |
| ATOM | 3090 | HD12 | LEU | 200 | 56.813 | 30.176 | 44.374 | 1.00 | 0.00 | H |
| ATOM | 3091 | HD13 | LEU | 200 | 55.226 | 30.945 | 44.146 | 1.00 | 0.00 | H |
| ATOM | 3092 | CD2  | LEU | 200 | 55.264 | 32.446 | 46.468 | 1.00 | 0.00 | C |
| ATOM | 3093 | HD21 | LEU | 200 | 55.761 | 33.326 | 46.057 | 1.00 | 0.00 | H |
| ATOM | 3094 | HD22 | LEU | 200 | 54.264 | 32.380 | 46.035 | 1.00 | 0.00 | H |
| ATOM | 3095 | HD23 | LEU | 200 | 55.176 | 32.572 | 47.546 | 1.00 | 0.00 | H |
| ATOM | 3096 | C    | LEU | 200 | 54.567 | 28.646 | 48.688 | 1.00 | 0.00 | C |
| ATOM | 3097 | O    | LEU | 200 | 54.986 | 27.466 | 48.750 | 1.00 | 0.00 | O |
| ATOM | 3098 | N    | THR | 201 | 53.302 | 28.890 | 49.031 | 1.00 | 0.00 | N |
| ATOM | 3099 | H    | THR | 201 | 52.952 | 29.836 | 48.970 | 1.00 | 0.00 | H |
| ATOM | 3100 | CA   | THR | 201 | 52.374 | 27.886 | 49.467 | 1.00 | 0.00 | C |
| ATOM | 3101 | HA   | THR | 201 | 52.864 | 27.298 | 50.245 | 1.00 | 0.00 | H |
| ATOM | 3102 | CB   | THR | 201 | 51.190 | 28.660 | 50.158 | 1.00 | 0.00 | C |
| ATOM | 3103 | HB   | THR | 201 | 50.526 | 27.894 | 50.560 | 1.00 | 0.00 | H |
| ATOM | 3104 | CG2  | THR | 201 | 51.522 | 29.579 | 51.333 | 1.00 | 0.00 | C |
| ATOM | 3105 | HG21 | THR | 201 | 51.841 | 28.982 | 52.181 | 1.00 | 0.00 | H |
| ATOM | 3106 | HG22 | THR | 201 | 52.322 | 30.267 | 51.068 | 1.00 | 0.00 | H |
| ATOM | 3107 | HG23 | THR | 201 | 50.639 | 30.156 | 51.611 | 1.00 | 0.00 | H |
| ATOM | 3108 | OG1  | THR | 201 | 50.410 | 29.382 | 49.228 | 1.00 | 0.00 | O |
| ATOM | 3109 | HG1  | THR | 201 | 49.521 | 29.474 | 49.598 | 1.00 | 0.00 | H |
| ATOM | 3110 | C    | THR | 201 | 51.842 | 26.917 | 48.457 | 1.00 | 0.00 | C |
| ATOM | 3111 | O    | THR | 201 | 51.386 | 25.847 | 48.824 | 1.00 | 0.00 | O |
| ATOM | 3112 | N    | THR | 202 | 51.920 | 27.277 | 47.198 | 1.00 | 0.00 | N |
| ATOM | 3113 | H    | THR | 202 | 52.279 | 28.203 | 47.015 | 1.00 | 0.00 | H |
| ATOM | 3114 | CA   | THR | 202 | 51.585 | 26.493 | 45.984 | 1.00 | 0.00 | C |
| ATOM | 3115 | HA   | THR | 202 | 51.425 | 25.458 | 46.280 | 1.00 | 0.00 | H |
| ATOM | 3116 | CB   | THR | 202 | 50.286 | 27.010 | 45.338 | 1.00 | 0.00 | C |
| ATOM | 3117 | HB   | THR | 202 | 49.961 | 26.330 | 44.554 | 1.00 | 0.00 | H |
| ATOM | 3118 | CG2  | THR | 202 | 49.176 | 27.103 | 46.374 | 1.00 | 0.00 | C |

|      |      |      |     |     |        |        |        |      |      |   |
|------|------|------|-----|-----|--------|--------|--------|------|------|---|
| ATOM | 3119 | HG21 | THR | 202 | 48.252 | 27.293 | 45.832 | 1.00 | 0.00 | H |
| ATOM | 3120 | HG22 | THR | 202 | 49.082 | 26.170 | 46.928 | 1.00 | 0.00 | H |
| ATOM | 3121 | HG23 | THR | 202 | 49.347 | 27.928 | 47.066 | 1.00 | 0.00 | H |
| ATOM | 3122 | OG1  | THR | 202 | 50.514 | 28.306 | 44.770 | 1.00 | 0.00 | O |
| ATOM | 3123 | HG1  | THR | 202 | 51.093 | 28.216 | 44.009 | 1.00 | 0.00 | H |
| ATOM | 3124 | C    | THR | 202 | 52.730 | 26.528 | 44.939 | 1.00 | 0.00 | C |
| ATOM | 3125 | O    | THR | 202 | 53.724 | 27.240 | 45.067 | 1.00 | 0.00 | O |
| ATOM | 3126 | N    | PRO | 203 | 52.790 | 25.628 | 43.928 | 1.00 | 0.00 | N |
| ATOM | 3127 | CD   | PRO | 203 | 51.749 | 24.610 | 43.660 | 1.00 | 0.00 | C |
| ATOM | 3128 | HD2  | PRO | 203 | 50.900 | 25.067 | 43.151 | 1.00 | 0.00 | H |
| ATOM | 3129 | HD3  | PRO | 203 | 51.437 | 24.095 | 44.565 | 1.00 | 0.00 | H |
| ATOM | 3130 | CG   | PRO | 203 | 52.446 | 23.663 | 42.720 | 1.00 | 0.00 | C |
| ATOM | 3131 | HG2  | PRO | 203 | 51.733 | 23.107 | 42.117 | 1.00 | 0.00 | H |
| ATOM | 3132 | HG3  | PRO | 203 | 53.061 | 22.971 | 43.296 | 1.00 | 0.00 | H |
| ATOM | 3133 | CB   | PRO | 203 | 53.320 | 24.540 | 41.890 | 1.00 | 0.00 | C |
| ATOM | 3134 | HB2  | PRO | 203 | 52.716 | 25.023 | 41.119 | 1.00 | 0.00 | H |
| ATOM | 3135 | HB3  | PRO | 203 | 54.133 | 23.971 | 41.440 | 1.00 | 0.00 | H |
| ATOM | 3136 | CA   | PRO | 203 | 53.863 | 25.575 | 42.880 | 1.00 | 0.00 | C |
| ATOM | 3137 | HA   | PRO | 203 | 54.724 | 25.124 | 43.349 | 1.00 | 0.00 | H |
| ATOM | 3138 | C    | PRO | 203 | 54.154 | 26.843 | 42.163 | 1.00 | 0.00 | C |
| ATOM | 3139 | O    | PRO | 203 | 53.213 | 27.646 | 41.971 | 1.00 | 0.00 | O |
| ATOM | 3140 | N    | PRO | 204 | 55.411 | 27.166 | 41.855 | 1.00 | 0.00 | N |
| ATOM | 3141 | CD   | PRO | 204 | 55.822 | 28.434 | 41.201 | 1.00 | 0.00 | C |
| ATOM | 3142 | HD2  | PRO | 204 | 55.487 | 29.302 | 41.770 | 1.00 | 0.00 | H |
| ATOM | 3143 | HD3  | PRO | 204 | 55.431 | 28.464 | 40.183 | 1.00 | 0.00 | H |
| ATOM | 3144 | CG   | PRO | 204 | 57.351 | 28.358 | 41.178 | 1.00 | 0.00 | C |
| ATOM | 3145 | HG2  | PRO | 204 | 57.749 | 28.761 | 42.110 | 1.00 | 0.00 | H |
| ATOM | 3146 | HG3  | PRO | 204 | 57.771 | 28.880 | 40.318 | 1.00 | 0.00 | H |
| ATOM | 3147 | CB   | PRO | 204 | 57.592 | 26.868 | 41.109 | 1.00 | 0.00 | C |
| ATOM | 3148 | HB2  | PRO | 204 | 58.594 | 26.586 | 41.425 | 1.00 | 0.00 | H |

|      |      |      |     |     |        |        |        |      |      |   |
|------|------|------|-----|-----|--------|--------|--------|------|------|---|
| ATOM | 3149 | HB3  | PRO | 204 | 57.444 | 26.538 | 40.079 | 1.00 | 0.00 | H |
| ATOM | 3150 | CA   | PRO | 204 | 56.519 | 26.282 | 41.960 | 1.00 | 0.00 | C |
| ATOM | 3151 | HA   | PRO | 204 | 56.236 | 25.336 | 41.496 | 1.00 | 0.00 | H |
| ATOM | 3152 | C    | PRO | 204 | 56.953 | 25.932 | 43.418 | 1.00 | 0.00 | C |
| ATOM | 3153 | O    | PRO | 204 | 57.938 | 25.268 | 43.566 | 1.00 | 0.00 | O |
| ATOM | 3154 | N    | CYS | 205 | 56.400 | 26.513 | 44.498 | 1.00 | 0.00 | N |
| ATOM | 3155 | H    | CYS | 205 | 55.586 | 27.094 | 44.353 | 1.00 | 0.00 | H |
| ATOM | 3156 | CA   | CYS | 205 | 56.898 | 26.460 | 45.829 | 1.00 | 0.00 | C |
| ATOM | 3157 | HA   | CYS | 205 | 56.355 | 27.165 | 46.446 | 1.00 | 0.00 | H |
| ATOM | 3158 | CB   | CYS | 205 | 56.642 | 25.070 | 46.412 | 1.00 | 0.00 | C |
| ATOM | 3159 | HB2  | CYS | 205 | 57.161 | 24.318 | 45.818 | 1.00 | 0.00 | H |
| ATOM | 3160 | HB3  | CYS | 205 | 57.047 | 25.035 | 47.424 | 1.00 | 0.00 | H |
| ATOM | 3161 | SG   | CYS | 205 | 54.892 | 24.623 | 46.512 | 1.00 | 0.00 | S |
| ATOM | 3162 | HG   | CYS | 205 | 54.553 | 25.595 | 47.358 | 1.00 | 0.00 | H |
| ATOM | 3163 | C    | CYS | 205 | 58.396 | 26.788 | 45.918 | 1.00 | 0.00 | C |
| ATOM | 3164 | O    | CYS | 205 | 59.180 | 26.060 | 46.468 | 1.00 | 0.00 | O |
| ATOM | 3165 | N    | THR | 206 | 58.880 | 27.874 | 45.353 | 1.00 | 0.00 | N |
| ATOM | 3166 | H    | THR | 206 | 58.248 | 28.461 | 44.829 | 1.00 | 0.00 | H |
| ATOM | 3167 | CA   | THR | 206 | 60.184 | 28.383 | 45.556 | 1.00 | 0.00 | C |
| ATOM | 3168 | HA   | THR | 206 | 60.874 | 27.558 | 45.738 | 1.00 | 0.00 | H |
| ATOM | 3169 | CB   | THR | 206 | 60.661 | 29.077 | 44.267 | 1.00 | 0.00 | C |
| ATOM | 3170 | HB   | THR | 206 | 61.674 | 29.455 | 44.411 | 1.00 | 0.00 | H |
| ATOM | 3171 | CG2  | THR | 206 | 60.662 | 28.099 | 43.103 | 1.00 | 0.00 | C |
| ATOM | 3172 | HG21 | THR | 206 | 59.668 | 27.698 | 42.940 | 1.00 | 0.00 | H |
| ATOM | 3173 | HG22 | THR | 206 | 60.995 | 28.606 | 42.197 | 1.00 | 0.00 | H |
| ATOM | 3174 | HG23 | THR | 206 | 61.345 | 27.276 | 43.317 | 1.00 | 0.00 | H |
| ATOM | 3175 | OG1  | THR | 206 | 59.791 | 30.176 | 43.962 | 1.00 | 0.00 | O |
| ATOM | 3176 | HG1  | THR | 206 | 59.895 | 30.844 | 44.645 | 1.00 | 0.00 | H |
| ATOM | 3177 | C    | THR | 206 | 60.293 | 29.357 | 46.763 | 1.00 | 0.00 | C |
| ATOM | 3178 | O    | THR | 206 | 59.321 | 29.871 | 47.262 | 1.00 | 0.00 | O |

|      |      |      |     |     |        |        |        |      |      |   |
|------|------|------|-----|-----|--------|--------|--------|------|------|---|
| ATOM | 3179 | N    | GLU | 207 | 61.511 | 29.493 | 47.287 | 1.00 | 0.00 | N |
| ATOM | 3180 | H    | GLU | 207 | 62.282 | 29.024 | 46.835 | 1.00 | 0.00 | H |
| ATOM | 3181 | CA   | GLU | 207 | 61.817 | 30.164 | 48.516 | 1.00 | 0.00 | C |
| ATOM | 3182 | HA   | GLU | 207 | 60.964 | 30.131 | 49.180 | 1.00 | 0.00 | H |
| ATOM | 3183 | CB   | GLU | 207 | 62.951 | 29.403 | 49.206 | 1.00 | 0.00 | C |
| ATOM | 3184 | HB2  | GLU | 207 | 63.812 | 29.408 | 48.535 | 1.00 | 0.00 | H |
| ATOM | 3185 | HB3  | GLU | 207 | 63.228 | 29.928 | 50.121 | 1.00 | 0.00 | H |
| ATOM | 3186 | CG   | GLU | 207 | 62.611 | 27.967 | 49.578 | 1.00 | 0.00 | C |
| ATOM | 3187 | HG2  | GLU | 207 | 61.817 | 27.985 | 50.325 | 1.00 | 0.00 | H |
| ATOM | 3188 | HG3  | GLU | 207 | 62.247 | 27.429 | 48.702 | 1.00 | 0.00 | H |
| ATOM | 3189 | CD   | GLU | 207 | 63.787 | 27.211 | 50.128 | 1.00 | 0.00 | C |
| ATOM | 3190 | OE1  | GLU | 207 | 64.882 | 27.714 | 50.051 | 1.00 | 0.00 | O |
| ATOM | 3191 | OE2  | GLU | 207 | 63.591 | 26.127 | 50.627 | 1.00 | 0.00 | O |
| ATOM | 3192 | C    | GLU | 207 | 62.199 | 31.680 | 48.359 | 1.00 | 0.00 | C |
| ATOM | 3193 | O    | GLU | 207 | 62.376 | 32.196 | 47.293 | 1.00 | 0.00 | O |
| ATOM | 3194 | N    | GLY | 208 | 62.302 | 32.429 | 49.435 | 1.00 | 0.00 | N |
| ATOM | 3195 | H    | GLY | 208 | 62.133 | 31.952 | 50.308 | 1.00 | 0.00 | H |
| ATOM | 3196 | CA   | GLY | 208 | 62.623 | 33.812 | 49.589 | 1.00 | 0.00 | C |
| ATOM | 3197 | HA2  | GLY | 208 | 63.162 | 33.926 | 50.529 | 1.00 | 0.00 | H |
| ATOM | 3198 | HA3  | GLY | 208 | 63.287 | 34.122 | 48.780 | 1.00 | 0.00 | H |
| ATOM | 3199 | C    | GLY | 208 | 61.419 | 34.724 | 49.622 | 1.00 | 0.00 | C |
| ATOM | 3200 | O    | GLY | 208 | 61.443 | 35.705 | 48.915 | 1.00 | 0.00 | O |
| ATOM | 3201 | N    | VAL | 209 | 60.349 | 34.317 | 50.258 | 1.00 | 0.00 | N |
| ATOM | 3202 | H    | VAL | 209 | 60.355 | 33.438 | 50.757 | 1.00 | 0.00 | H |
| ATOM | 3203 | CA   | VAL | 209 | 59.079 | 35.138 | 50.267 | 1.00 | 0.00 | C |
| ATOM | 3204 | HA   | VAL | 209 | 59.187 | 36.015 | 49.631 | 1.00 | 0.00 | H |
| ATOM | 3205 | CB   | VAL | 209 | 57.872 | 34.323 | 49.767 | 1.00 | 0.00 | C |
| ATOM | 3206 | HB   | VAL | 209 | 57.718 | 33.469 | 50.423 | 1.00 | 0.00 | H |
| ATOM | 3207 | CG1  | VAL | 209 | 56.613 | 35.178 | 49.773 | 1.00 | 0.00 | C |
| ATOM | 3208 | HG11 | VAL | 209 | 55.789 | 34.608 | 49.344 | 1.00 | 0.00 | H |

|      |      |      |     |     |        |        |        |      |      |   |
|------|------|------|-----|-----|--------|--------|--------|------|------|---|
| ATOM | 3209 | HG12 | VAL | 209 | 56.336 | 35.443 | 50.793 | 1.00 | 0.00 | H |
| ATOM | 3210 | HG13 | VAL | 209 | 56.766 | 36.086 | 49.189 | 1.00 | 0.00 | H |
| ATOM | 3211 | CG2  | VAL | 209 | 58.152 | 33.787 | 48.371 | 1.00 | 0.00 | C |
| ATOM | 3212 | HG21 | VAL | 209 | 58.360 | 34.602 | 47.680 | 1.00 | 0.00 | H |
| ATOM | 3213 | HG22 | VAL | 209 | 59.001 | 33.103 | 48.385 | 1.00 | 0.00 | H |
| ATOM | 3214 | HG23 | VAL | 209 | 57.293 | 33.227 | 48.023 | 1.00 | 0.00 | H |
| ATOM | 3215 | C    | VAL | 209 | 58.843 | 35.600 | 51.742 | 1.00 | 0.00 | C |
| ATOM | 3216 | O    | VAL | 209 | 58.941 | 34.723 | 52.586 | 1.00 | 0.00 | O |
| ATOM | 3217 | N    | LEU | 210 | 58.556 | 36.863 | 51.957 | 1.00 | 0.00 | N |
| ATOM | 3218 | H    | LEU | 210 | 58.476 | 37.491 | 51.178 | 1.00 | 0.00 | H |
| ATOM | 3219 | CA   | LEU | 210 | 58.169 | 37.358 | 53.243 | 1.00 | 0.00 | C |
| ATOM | 3220 | HA   | LEU | 210 | 58.540 | 36.695 | 54.025 | 1.00 | 0.00 | H |
| ATOM | 3221 | CB   | LEU | 210 | 58.740 | 38.762 | 53.477 | 1.00 | 0.00 | C |
| ATOM | 3222 | HB2  | LEU | 210 | 59.826 | 38.692 | 53.560 | 1.00 | 0.00 | H |
| ATOM | 3223 | HB3  | LEU | 210 | 58.520 | 39.359 | 52.590 | 1.00 | 0.00 | H |
| ATOM | 3224 | CG   | LEU | 210 | 58.179 | 39.515 | 54.691 | 1.00 | 0.00 | C |
| ATOM | 3225 | HG   | LEU | 210 | 57.093 | 39.542 | 54.637 | 1.00 | 0.00 | H |
| ATOM | 3226 | CD1  | LEU | 210 | 58.593 | 38.798 | 55.969 | 1.00 | 0.00 | C |
| ATOM | 3227 | HD11 | LEU | 210 | 58.130 | 39.356 | 56.771 | 1.00 | 0.00 | H |
| ATOM | 3228 | HD12 | LEU | 210 | 58.225 | 37.777 | 55.990 | 1.00 | 0.00 | H |
| ATOM | 3229 | HD13 | LEU | 210 | 59.671 | 38.838 | 56.089 | 1.00 | 0.00 | H |
| ATOM | 3230 | CD2  | LEU | 210 | 58.687 | 40.949 | 54.679 | 1.00 | 0.00 | C |
| ATOM | 3231 | HD21 | LEU | 210 | 58.306 | 41.486 | 55.549 | 1.00 | 0.00 | H |
| ATOM | 3232 | HD22 | LEU | 210 | 59.777 | 40.962 | 54.696 | 1.00 | 0.00 | H |
| ATOM | 3233 | HD23 | LEU | 210 | 58.342 | 41.458 | 53.779 | 1.00 | 0.00 | H |
| ATOM | 3234 | C    | LEU | 210 | 56.605 | 37.355 | 53.263 | 1.00 | 0.00 | C |
| ATOM | 3235 | O    | LEU | 210 | 55.992 | 37.844 | 52.340 | 1.00 | 0.00 | O |
| ATOM | 3236 | N    | PHE | 211 | 56.031 | 36.769 | 54.316 | 1.00 | 0.00 | N |
| ATOM | 3237 | H    | PHE | 211 | 56.629 | 36.379 | 55.031 | 1.00 | 0.00 | H |
| ATOM | 3238 | CA   | PHE | 211 | 54.571 | 36.634 | 54.537 | 1.00 | 0.00 | C |

|      |      |      |     |     |        |        |        |      |      |   |
|------|------|------|-----|-----|--------|--------|--------|------|------|---|
| ATOM | 3239 | HA   | PHE | 211 | 54.026 | 36.991 | 53.663 | 1.00 | 0.00 | H |
| ATOM | 3240 | CB   | PHE | 211 | 54.167 | 35.182 | 54.799 | 1.00 | 0.00 | C |
| ATOM | 3241 | HB2  | PHE | 211 | 54.740 | 34.809 | 55.648 | 1.00 | 0.00 | H |
| ATOM | 3242 | HB3  | PHE | 211 | 53.114 | 35.153 | 55.079 | 1.00 | 0.00 | H |
| ATOM | 3243 | CG   | PHE | 211 | 54.387 | 34.271 | 53.625 | 1.00 | 0.00 | C |
| ATOM | 3244 | CD1  | PHE | 211 | 55.615 | 33.657 | 53.426 | 1.00 | 0.00 | C |
| ATOM | 3245 | HD1  | PHE | 211 | 56.420 | 33.820 | 54.128 | 1.00 | 0.00 | H |
| ATOM | 3246 | CE1  | PHE | 211 | 55.818 | 32.818 | 52.346 | 1.00 | 0.00 | C |
| ATOM | 3247 | HE1  | PHE | 211 | 56.784 | 32.361 | 52.194 | 1.00 | 0.00 | H |
| ATOM | 3248 | CZ   | PHE | 211 | 54.795 | 32.584 | 51.453 | 1.00 | 0.00 | C |
| ATOM | 3249 | HZ   | PHE | 211 | 54.949 | 31.940 | 50.603 | 1.00 | 0.00 | H |
| ATOM | 3250 | CE2  | PHE | 211 | 53.568 | 33.188 | 51.638 | 1.00 | 0.00 | C |
| ATOM | 3251 | HE2  | PHE | 211 | 52.760 | 32.998 | 50.945 | 1.00 | 0.00 | H |
| ATOM | 3252 | CD2  | PHE | 211 | 53.368 | 34.026 | 52.718 | 1.00 | 0.00 | C |
| ATOM | 3253 | HD2  | PHE | 211 | 52.413 | 34.516 | 52.833 | 1.00 | 0.00 | H |
| ATOM | 3254 | C    | PHE | 211 | 54.228 | 37.528 | 55.752 | 1.00 | 0.00 | C |
| ATOM | 3255 | O    | PHE | 211 | 54.836 | 37.349 | 56.828 | 1.00 | 0.00 | O |
| ATOM | 3256 | N    | VAL | 212 | 53.347 | 38.491 | 55.614 | 1.00 | 0.00 | N |
| ATOM | 3257 | H    | VAL | 212 | 52.875 | 38.609 | 54.727 | 1.00 | 0.00 | H |
| ATOM | 3258 | CA   | VAL | 212 | 53.058 | 39.469 | 56.689 | 1.00 | 0.00 | C |
| ATOM | 3259 | HA   | VAL | 212 | 53.595 | 39.220 | 57.602 | 1.00 | 0.00 | H |
| ATOM | 3260 | CB   | VAL | 212 | 53.394 | 40.915 | 56.279 | 1.00 | 0.00 | C |
| ATOM | 3261 | HB   | VAL | 212 | 52.783 | 41.189 | 55.419 | 1.00 | 0.00 | H |
| ATOM | 3262 | CG1  | VAL | 212 | 53.088 | 41.876 | 57.418 | 1.00 | 0.00 | C |
| ATOM | 3263 | HG11 | VAL | 212 | 53.446 | 42.878 | 57.181 | 1.00 | 0.00 | H |
| ATOM | 3264 | HG12 | VAL | 212 | 52.011 | 41.920 | 57.573 | 1.00 | 0.00 | H |
| ATOM | 3265 | HG13 | VAL | 212 | 53.558 | 41.534 | 58.337 | 1.00 | 0.00 | H |
| ATOM | 3266 | CG2  | VAL | 212 | 54.856 | 41.011 | 55.870 | 1.00 | 0.00 | C |
| ATOM | 3267 | HG21 | VAL | 212 | 55.504 | 40.565 | 56.617 | 1.00 | 0.00 | H |
| ATOM | 3268 | HG22 | VAL | 212 | 55.001 | 40.497 | 54.920 | 1.00 | 0.00 | H |



|      |      |      |     |     |        |        |        |      |      |   |
|------|------|------|-----|-----|--------|--------|--------|------|------|---|
| ATOM | 3269 | HG23 | VAL | 212 | 55.142 | 42.054 | 55.735 | 1.00 | 0.00 | H |
| ATOM | 3270 | C    | VAL | 212 | 51.539 | 39.285 | 56.919 | 1.00 | 0.00 | C |
| ATOM | 3271 | O    | VAL | 212 | 50.687 | 39.166 | 56.045 | 1.00 | 0.00 | O |
| ATOM | 3272 | N    | VAL | 213 | 51.264 | 39.154 | 58.218 | 1.00 | 0.00 | N |
| ATOM | 3273 | H    | VAL | 213 | 52.015 | 39.221 | 58.887 | 1.00 | 0.00 | H |
| ATOM | 3274 | CA   | VAL | 213 | 49.941 | 39.003 | 58.730 | 1.00 | 0.00 | C |
| ATOM | 3275 | HA   | VAL | 213 | 49.252 | 38.854 | 57.901 | 1.00 | 0.00 | H |
| ATOM | 3276 | CB   | VAL | 213 | 49.858 | 37.742 | 59.611 | 1.00 | 0.00 | C |
| ATOM | 3277 | HB   | VAL | 213 | 50.602 | 37.813 | 60.401 | 1.00 | 0.00 | H |
| ATOM | 3278 | CG1  | VAL | 213 | 48.483 | 37.631 | 60.253 | 1.00 | 0.00 | C |
| ATOM | 3279 | HG11 | VAL | 213 | 48.398 | 36.656 | 60.724 | 1.00 | 0.00 | H |
| ATOM | 3280 | HG12 | VAL | 213 | 48.347 | 38.384 | 61.028 | 1.00 | 0.00 | H |
| ATOM | 3281 | HG13 | VAL | 213 | 47.700 | 37.723 | 59.499 | 1.00 | 0.00 | H |
| ATOM | 3282 | CG2  | VAL | 213 | 50.166 | 36.507 | 58.778 | 1.00 | 0.00 | C |
| ATOM | 3283 | HG21 | VAL | 213 | 50.123 | 35.631 | 59.422 | 1.00 | 0.00 | H |
| ATOM | 3284 | HG22 | VAL | 213 | 49.403 | 36.383 | 58.017 | 1.00 | 0.00 | H |
| ATOM | 3285 | HG23 | VAL | 213 | 51.156 | 36.563 | 58.326 | 1.00 | 0.00 | H |
| ATOM | 3286 | C    | VAL | 213 | 49.476 | 40.137 | 59.517 | 1.00 | 0.00 | C |
| ATOM | 3287 | O    | VAL | 213 | 50.132 | 40.720 | 60.367 | 1.00 | 0.00 | O |
| ATOM | 3288 | N    | LEU | 214 | 48.229 | 40.525 | 59.211 | 1.00 | 0.00 | N |
| ATOM | 3289 | H    | LEU | 214 | 47.733 | 40.027 | 58.486 | 1.00 | 0.00 | H |
| ATOM | 3290 | CA   | LEU | 214 | 47.481 | 41.615 | 59.928 | 1.00 | 0.00 | C |
| ATOM | 3291 | HA   | LEU | 214 | 48.181 | 42.337 | 60.353 | 1.00 | 0.00 | H |
| ATOM | 3292 | CB   | LEU | 214 | 46.517 | 42.354 | 58.993 | 1.00 | 0.00 | C |
| ATOM | 3293 | HB2  | LEU | 214 | 45.937 | 41.621 | 58.429 | 1.00 | 0.00 | H |
| ATOM | 3294 | HB3  | LEU | 214 | 45.816 | 42.906 | 59.621 | 1.00 | 0.00 | H |
| ATOM | 3295 | CG   | LEU | 214 | 47.162 | 43.363 | 58.033 | 1.00 | 0.00 | C |
| ATOM | 3296 | HG   | LEU | 214 | 47.692 | 44.108 | 58.619 | 1.00 | 0.00 | H |
| ATOM | 3297 | CD1  | LEU | 214 | 48.134 | 42.638 | 57.112 | 1.00 | 0.00 | C |
| ATOM | 3298 | HD11 | LEU | 214 | 48.407 | 43.291 | 56.283 | 1.00 | 0.00 | H |

|      |      |      |     |     |        |        |        |      |      |   |
|------|------|------|-----|-----|--------|--------|--------|------|------|---|
| ATOM | 3299 | HD12 | LEU | 214 | 49.054 | 42.398 | 57.644 | 1.00 | 0.00 | H |
| ATOM | 3300 | HD13 | LEU | 214 | 47.688 | 41.731 | 56.705 | 1.00 | 0.00 | H |
| ATOM | 3301 | CD2  | LEU | 214 | 46.078 | 44.071 | 57.236 | 1.00 | 0.00 | C |
| ATOM | 3302 | HD21 | LEU | 214 | 46.527 | 44.779 | 56.540 | 1.00 | 0.00 | H |
| ATOM | 3303 | HD22 | LEU | 214 | 45.477 | 43.354 | 56.681 | 1.00 | 0.00 | H |
| ATOM | 3304 | HD23 | LEU | 214 | 45.445 | 44.623 | 57.926 | 1.00 | 0.00 | H |
| ATOM | 3305 | C    | LEU | 214 | 46.705 | 40.921 | 61.085 | 1.00 | 0.00 | C |
| ATOM | 3306 | O    | LEU | 214 | 45.940 | 39.994 | 60.940 | 1.00 | 0.00 | O |
| ATOM | 3307 | N    | THR | 215 | 46.892 | 41.270 | 62.305 | 1.00 | 0.00 | N |
| ATOM | 3308 | H    | THR | 215 | 47.529 | 42.036 | 62.478 | 1.00 | 0.00 | H |
| ATOM | 3309 | CA   | THR | 215 | 46.381 | 40.586 | 63.483 | 1.00 | 0.00 | C |
| ATOM | 3310 | HA   | THR | 215 | 46.666 | 39.537 | 63.392 | 1.00 | 0.00 | H |
| ATOM | 3311 | CB   | THR | 215 | 47.060 | 41.143 | 64.748 | 1.00 | 0.00 | C |
| ATOM | 3312 | HB   | THR | 215 | 48.124 | 41.284 | 64.560 | 1.00 | 0.00 | H |
| ATOM | 3313 | CG2  | THR | 215 | 46.443 | 42.476 | 65.142 | 1.00 | 0.00 | C |
| ATOM | 3314 | HG21 | THR | 215 | 46.958 | 42.848 | 66.022 | 1.00 | 0.00 | H |
| ATOM | 3315 | HG22 | THR | 215 | 46.586 | 43.191 | 64.342 | 1.00 | 0.00 | H |
| ATOM | 3316 | HG23 | THR | 215 | 45.391 | 42.440 | 65.410 | 1.00 | 0.00 | H |
| ATOM | 3317 | OG1  | THR | 215 | 46.904 | 40.211 | 65.826 | 1.00 | 0.00 | O |
| ATOM | 3318 | HG1  | THR | 215 | 45.961 | 40.077 | 65.963 | 1.00 | 0.00 | H |
| ATOM | 3319 | C    | THR | 215 | 44.906 | 40.632 | 63.702 | 1.00 | 0.00 | C |
| ATOM | 3320 | O    | THR | 215 | 44.445 | 40.346 | 64.867 | 1.00 | 0.00 | O |
| ATOM | 3321 | N    | SER | 216 | 44.077 | 40.855 | 62.685 | 1.00 | 0.00 | N |
| ATOM | 3322 | H    | SER | 216 | 44.434 | 41.011 | 61.753 | 1.00 | 0.00 | H |
| ATOM | 3323 | CA   | SER | 216 | 42.588 | 40.938 | 62.925 | 1.00 | 0.00 | C |
| ATOM | 3324 | HA   | SER | 216 | 42.300 | 40.192 | 63.665 | 1.00 | 0.00 | H |
| ATOM | 3325 | CB   | SER | 216 | 42.164 | 42.307 | 63.418 | 1.00 | 0.00 | C |
| ATOM | 3326 | HB2  | SER | 216 | 42.656 | 42.513 | 64.369 | 1.00 | 0.00 | H |
| ATOM | 3327 | HB3  | SER | 216 | 42.462 | 43.068 | 62.696 | 1.00 | 0.00 | H |
| ATOM | 3328 | OG   | SER | 216 | 40.776 | 42.368 | 63.602 | 1.00 | 0.00 | O |

|      |      |     |     |     |        |        |        |      |      |   |
|------|------|-----|-----|-----|--------|--------|--------|------|------|---|
| ATOM | 3329 | HG  | SER | 216 | 40.343 | 42.345 | 62.743 | 1.00 | 0.00 | H |
| ATOM | 3330 | C   | SER | 216 | 41.914 | 40.624 | 61.593 | 1.00 | 0.00 | C |
| ATOM | 3331 | O   | SER | 216 | 42.400 | 41.266 | 60.640 | 1.00 | 0.00 | O |
| ATOM | 3332 | N   | PRO | 217 | 40.864 | 39.778 | 61.454 | 1.00 | 0.00 | N |
| ATOM | 3333 | CD  | PRO | 217 | 40.321 | 38.945 | 62.537 | 1.00 | 0.00 | C |
| ATOM | 3334 | HD2 | PRO | 217 | 40.088 | 39.534 | 63.425 | 1.00 | 0.00 | H |
| ATOM | 3335 | HD3 | PRO | 217 | 41.020 | 38.141 | 62.771 | 1.00 | 0.00 | H |
| ATOM | 3336 | CG  | PRO | 217 | 39.064 | 38.386 | 61.926 | 1.00 | 0.00 | C |
| ATOM | 3337 | HG2 | PRO | 217 | 38.237 | 39.067 | 62.127 | 1.00 | 0.00 | H |
| ATOM | 3338 | HG3 | PRO | 217 | 38.838 | 37.392 | 62.314 | 1.00 | 0.00 | H |
| ATOM | 3339 | CB  | PRO | 217 | 39.344 | 38.358 | 60.462 | 1.00 | 0.00 | C |
| ATOM | 3340 | HB2 | PRO | 217 | 38.435 | 38.351 | 59.865 | 1.00 | 0.00 | H |
| ATOM | 3341 | HB3 | PRO | 217 | 39.928 | 37.469 | 60.236 | 1.00 | 0.00 | H |
| ATOM | 3342 | CA  | PRO | 217 | 40.181 | 39.617 | 60.215 | 1.00 | 0.00 | C |
| ATOM | 3343 | HA  | PRO | 217 | 40.906 | 39.437 | 59.424 | 1.00 | 0.00 | H |
| ATOM | 3344 | C   | PRO | 217 | 39.318 | 40.785 | 59.868 | 1.00 | 0.00 | C |
| ATOM | 3345 | O   | PRO | 217 | 39.046 | 41.762 | 60.649 | 1.00 | 0.00 | O |
| ATOM | 3346 | N   | GLN | 218 | 39.077 | 40.984 | 58.583 | 1.00 | 0.00 | N |
| ATOM | 3347 | H   | GLN | 218 | 39.437 | 40.303 | 57.928 | 1.00 | 0.00 | H |
| ATOM | 3348 | CA  | GLN | 218 | 38.079 | 41.940 | 58.052 | 1.00 | 0.00 | C |
| ATOM | 3349 | HA  | GLN | 218 | 38.205 | 42.886 | 58.579 | 1.00 | 0.00 | H |
| ATOM | 3350 | CB  | GLN | 218 | 38.340 | 42.194 | 56.565 | 1.00 | 0.00 | C |
| ATOM | 3351 | HB2 | GLN | 218 | 39.343 | 42.593 | 56.442 | 1.00 | 0.00 | H |
| ATOM | 3352 | HB3 | GLN | 218 | 38.283 | 41.245 | 56.043 | 1.00 | 0.00 | H |
| ATOM | 3353 | CG  | GLN | 218 | 37.356 | 43.151 | 55.915 | 1.00 | 0.00 | C |
| ATOM | 3354 | HG2 | GLN | 218 | 37.554 | 43.177 | 54.850 | 1.00 | 0.00 | H |
| ATOM | 3355 | HG3 | GLN | 218 | 36.337 | 42.779 | 55.989 | 1.00 | 0.00 | H |
| ATOM | 3356 | CD  | GLN | 218 | 37.433 | 44.548 | 56.502 | 1.00 | 0.00 | C |
| ATOM | 3357 | OE1 | GLN | 218 | 36.789 | 44.849 | 57.511 | 1.00 | 0.00 | O |
| ATOM | 3358 | NE2 | GLN | 218 | 38.223 | 45.410 | 55.873 | 1.00 | 0.00 | N |

|      |      |      |     |     |        |        |        |      |      |   |
|------|------|------|-----|-----|--------|--------|--------|------|------|---|
| ATOM | 3359 | HE21 | GLN | 218 | 38.732 | 45.122 | 55.052 | 1.00 | 0.00 | H |
| ATOM | 3360 | HE22 | GLN | 218 | 38.335 | 46.348 | 56.223 | 1.00 | 0.00 | H |
| ATOM | 3361 | C    | GLN | 218 | 36.625 | 41.485 | 58.236 | 1.00 | 0.00 | C |
| ATOM | 3362 | O    | GLN | 218 | 36.333 | 40.276 | 58.016 | 1.00 | 0.00 | O |
| ATOM | 3363 | N    | ILE | 219 | 35.672 | 42.385 | 58.414 | 1.00 | 0.00 | N |
| ATOM | 3364 | H    | ILE | 219 | 35.942 | 43.356 | 58.488 | 1.00 | 0.00 | H |
| ATOM | 3365 | CA   | ILE | 219 | 34.249 | 42.090 | 58.564 | 1.00 | 0.00 | C |
| ATOM | 3366 | HA   | ILE | 219 | 34.165 | 41.156 | 59.121 | 1.00 | 0.00 | H |
| ATOM | 3367 | CB   | ILE | 219 | 33.605 | 43.207 | 59.406 | 1.00 | 0.00 | C |
| ATOM | 3368 | HB   | ILE | 219 | 33.659 | 44.156 | 58.868 | 1.00 | 0.00 | H |
| ATOM | 3369 | CG2  | ILE | 219 | 32.142 | 42.891 | 59.678 | 1.00 | 0.00 | C |
| ATOM | 3370 | HG21 | ILE | 219 | 31.767 | 43.527 | 60.481 | 1.00 | 0.00 | H |
| ATOM | 3371 | HG22 | ILE | 219 | 31.524 | 43.088 | 58.806 | 1.00 | 0.00 | H |
| ATOM | 3372 | HG23 | ILE | 219 | 32.021 | 41.849 | 59.972 | 1.00 | 0.00 | H |
| ATOM | 3373 | CG1  | ILE | 219 | 34.370 | 43.394 | 60.719 | 1.00 | 0.00 | C |
| ATOM | 3374 | HG12 | ILE | 219 | 35.377 | 43.767 | 60.531 | 1.00 | 0.00 | H |
| ATOM | 3375 | HG13 | ILE | 219 | 33.865 | 44.162 | 61.306 | 1.00 | 0.00 | H |
| ATOM | 3376 | CD1  | ILE | 219 | 34.454 | 42.141 | 61.560 | 1.00 | 0.00 | C |
| ATOM | 3377 | HD11 | ILE | 219 | 34.902 | 42.394 | 62.521 | 1.00 | 0.00 | H |
| ATOM | 3378 | HD12 | ILE | 219 | 33.467 | 41.720 | 61.747 | 1.00 | 0.00 | H |
| ATOM | 3379 | HD13 | ILE | 219 | 35.092 | 41.399 | 61.084 | 1.00 | 0.00 | H |
| ATOM | 3380 | C    | ILE | 219 | 33.387 | 41.903 | 57.319 | 1.00 | 0.00 | C |
| ATOM | 3381 | O    | ILE | 219 | 32.931 | 42.906 | 56.781 | 1.00 | 0.00 | O |
| ATOM | 3382 | N    | ILE | 220 | 33.207 | 40.696 | 56.798 | 1.00 | 0.00 | N |
| ATOM | 3383 | H    | ILE | 220 | 33.578 | 39.868 | 57.246 | 1.00 | 0.00 | H |
| ATOM | 3384 | CA   | ILE | 220 | 32.445 | 40.569 | 55.554 | 1.00 | 0.00 | C |
| ATOM | 3385 | HA   | ILE | 220 | 32.160 | 41.533 | 55.142 | 1.00 | 0.00 | H |
| ATOM | 3386 | CB   | ILE | 220 | 33.230 | 39.802 | 54.475 | 1.00 | 0.00 | C |
| ATOM | 3387 | HB   | ILE | 220 | 33.421 | 38.795 | 54.835 | 1.00 | 0.00 | H |
| ATOM | 3388 | CG2  | ILE | 220 | 32.424 | 39.720 | 53.188 | 1.00 | 0.00 | C |

|      |      |      |     |     |        |        |        |      |      |   |
|------|------|------|-----|-----|--------|--------|--------|------|------|---|
| ATOM | 3389 | HG21 | ILE | 220 | 33.023 | 39.269 | 52.397 | 1.00 | 0.00 | H |
| ATOM | 3390 | HG22 | ILE | 220 | 31.550 | 39.099 | 53.354 | 1.00 | 0.00 | H |
| ATOM | 3391 | HG23 | ILE | 220 | 32.102 | 40.706 | 52.872 | 1.00 | 0.00 | H |
| ATOM | 3392 | CG1  | ILE | 220 | 34.584 | 40.471 | 54.221 | 1.00 | 0.00 | C |
| ATOM | 3393 | HG12 | ILE | 220 | 35.184 | 40.460 | 55.131 | 1.00 | 0.00 | H |
| ATOM | 3394 | HG13 | ILE | 220 | 35.127 | 39.887 | 53.477 | 1.00 | 0.00 | H |
| ATOM | 3395 | CD1  | ILE | 220 | 34.477 | 41.892 | 53.719 | 1.00 | 0.00 | C |
| ATOM | 3396 | HD11 | ILE | 220 | 35.482 | 42.295 | 53.600 | 1.00 | 0.00 | H |
| ATOM | 3397 | HD12 | ILE | 220 | 33.984 | 41.931 | 52.748 | 1.00 | 0.00 | H |
| ATOM | 3398 | HD13 | ILE | 220 | 33.952 | 42.532 | 54.423 | 1.00 | 0.00 | H |
| ATOM | 3399 | C    | ILE | 220 | 31.139 | 39.835 | 55.902 | 1.00 | 0.00 | C |
| ATOM | 3400 | O    | ILE | 220 | 31.149 | 38.916 | 56.716 | 1.00 | 0.00 | O |
| ATOM | 3401 | N    | SER | 221 | 29.959 | 40.215 | 55.442 | 1.00 | 0.00 | N |
| ATOM | 3402 | H    | SER | 221 | 29.938 | 41.011 | 54.824 | 1.00 | 0.00 | H |
| ATOM | 3403 | CA   | SER | 221 | 28.678 | 39.575 | 55.719 | 1.00 | 0.00 | C |
| ATOM | 3404 | HA   | SER | 221 | 28.442 | 39.734 | 56.770 | 1.00 | 0.00 | H |
| ATOM | 3405 | CB   | SER | 221 | 27.592 | 40.217 | 54.878 | 1.00 | 0.00 | C |
| ATOM | 3406 | HB2  | SER | 221 | 27.469 | 41.259 | 55.173 | 1.00 | 0.00 | H |
| ATOM | 3407 | HB3  | SER | 221 | 27.878 | 40.174 | 53.827 | 1.00 | 0.00 | H |
| ATOM | 3408 | OG   | SER | 221 | 26.371 | 39.550 | 55.041 | 1.00 | 0.00 | O |
| ATOM | 3409 | HG   | SER | 221 | 25.980 | 39.831 | 55.874 | 1.00 | 0.00 | H |
| ATOM | 3410 | C    | SER | 221 | 28.752 | 38.043 | 55.437 | 1.00 | 0.00 | C |
| ATOM | 3411 | O    | SER | 221 | 29.318 | 37.690 | 54.424 | 1.00 | 0.00 | O |
| ATOM | 3412 | N    | LYS | 222 | 28.233 | 37.167 | 56.268 | 1.00 | 0.00 | N |
| ATOM | 3413 | H    | LYS | 222 | 27.780 | 37.536 | 57.093 | 1.00 | 0.00 | H |
| ATOM | 3414 | CA   | LYS | 222 | 28.276 | 35.664 | 56.158 | 1.00 | 0.00 | C |
| ATOM | 3415 | HA   | LYS | 222 | 29.315 | 35.353 | 56.280 | 1.00 | 0.00 | H |
| ATOM | 3416 | CB   | LYS | 222 | 27.446 | 35.004 | 57.261 | 1.00 | 0.00 | C |
| ATOM | 3417 | HB2  | LYS | 222 | 27.825 | 35.351 | 58.223 | 1.00 | 0.00 | H |
| ATOM | 3418 | HB3  | LYS | 222 | 26.410 | 35.339 | 57.179 | 1.00 | 0.00 | H |

|      |      |      |     |     |        |        |        |      |      |   |
|------|------|------|-----|-----|--------|--------|--------|------|------|---|
| ATOM | 3419 | CG   | LYS | 222 | 27.470 | 33.481 | 57.239 | 1.00 | 0.00 | C |
| ATOM | 3420 | HG2  | LYS | 222 | 26.985 | 33.113 | 56.334 | 1.00 | 0.00 | H |
| ATOM | 3421 | HG3  | LYS | 222 | 28.507 | 33.142 | 57.244 | 1.00 | 0.00 | H |
| ATOM | 3422 | CD   | LYS | 222 | 26.751 | 32.900 | 58.448 | 1.00 | 0.00 | C |
| ATOM | 3423 | HD2  | LYS | 222 | 27.182 | 33.329 | 59.354 | 1.00 | 0.00 | H |
| ATOM | 3424 | HD3  | LYS | 222 | 25.691 | 33.155 | 58.413 | 1.00 | 0.00 | H |
| ATOM | 3425 | CE   | LYS | 222 | 26.922 | 31.390 | 58.521 | 1.00 | 0.00 | C |
| ATOM | 3426 | HE2  | LYS | 222 | 27.980 | 31.151 | 58.400 | 1.00 | 0.00 | H |
| ATOM | 3427 | HE3  | LYS | 222 | 26.597 | 31.039 | 59.501 | 1.00 | 0.00 | H |
| ATOM | 3428 | NZ   | LYS | 222 | 26.137 | 30.689 | 57.470 | 1.00 | 0.00 | N |
| ATOM | 3429 | HZ1  | LYS | 222 | 26.348 | 31.095 | 56.569 | 1.00 | 0.00 | H |
| ATOM | 3430 | HZ2  | LYS | 222 | 26.405 | 29.715 | 57.426 | 1.00 | 0.00 | H |
| ATOM | 3431 | HZ3  | LYS | 222 | 25.147 | 30.767 | 57.645 | 1.00 | 0.00 | H |
| ATOM | 3432 | C    | LYS | 222 | 27.797 | 35.149 | 54.860 | 1.00 | 0.00 | C |
| ATOM | 3433 | O    | LYS | 222 | 28.483 | 34.269 | 54.290 | 1.00 | 0.00 | O |
| ATOM | 3434 | N    | THR | 223 | 26.638 | 35.581 | 54.342 | 1.00 | 0.00 | N |
| ATOM | 3435 | H    | THR | 223 | 26.100 | 36.266 | 54.852 | 1.00 | 0.00 | H |
| ATOM | 3436 | CA   | THR | 223 | 26.108 | 35.131 | 52.992 | 1.00 | 0.00 | C |
| ATOM | 3437 | HA   | THR | 223 | 26.001 | 34.045 | 53.010 | 1.00 | 0.00 | H |
| ATOM | 3438 | CB   | THR | 223 | 24.738 | 35.757 | 52.674 | 1.00 | 0.00 | C |
| ATOM | 3439 | HB   | THR | 223 | 24.817 | 36.844 | 52.707 | 1.00 | 0.00 | H |
| ATOM | 3440 | CG2  | THR | 223 | 24.267 | 35.336 | 51.290 | 1.00 | 0.00 | C |
| ATOM | 3441 | HG21 | THR | 223 | 23.231 | 35.647 | 51.149 | 1.00 | 0.00 | H |
| ATOM | 3442 | HG22 | THR | 223 | 24.871 | 35.817 | 50.521 | 1.00 | 0.00 | H |
| ATOM | 3443 | HG23 | THR | 223 | 24.332 | 34.252 | 51.183 | 1.00 | 0.00 | H |
| ATOM | 3444 | OG1  | THR | 223 | 23.778 | 35.334 | 53.650 | 1.00 | 0.00 | O |
| ATOM | 3445 | HG1  | THR | 223 | 23.714 | 34.376 | 53.618 | 1.00 | 0.00 | H |
| ATOM | 3446 | C    | THR | 223 | 27.105 | 35.498 | 51.876 | 1.00 | 0.00 | C |
| ATOM | 3447 | O    | THR | 223 | 27.428 | 34.677 | 51.094 | 1.00 | 0.00 | O |
| ATOM | 3448 | N    | ALA | 224 | 27.736 | 36.690 | 51.942 | 1.00 | 0.00 | N |

|      |      |      |     |     |        |        |        |      |      |   |
|------|------|------|-----|-----|--------|--------|--------|------|------|---|
| ATOM | 3449 | H    | ALA | 224 | 27.521 | 37.325 | 52.697 | 1.00 | 0.00 | H |
| ATOM | 3450 | CA   | ALA | 224 | 28.684 | 37.136 | 50.919 | 1.00 | 0.00 | C |
| ATOM | 3451 | HA   | ALA | 224 | 28.185 | 37.232 | 49.954 | 1.00 | 0.00 | H |
| ATOM | 3452 | CB   | ALA | 224 | 29.198 | 38.475 | 51.383 | 1.00 | 0.00 | C |
| ATOM | 3453 | HB1  | ALA | 224 | 29.762 | 38.936 | 50.571 | 1.00 | 0.00 | H |
| ATOM | 3454 | HB2  | ALA | 224 | 28.369 | 39.135 | 51.640 | 1.00 | 0.00 | H |
| ATOM | 3455 | HB3  | ALA | 224 | 29.863 | 38.374 | 52.228 | 1.00 | 0.00 | H |
| ATOM | 3456 | C    | ALA | 224 | 29.861 | 36.193 | 50.819 | 1.00 | 0.00 | C |
| ATOM | 3457 | O    | ALA | 224 | 30.129 | 35.571 | 49.749 | 1.00 | 0.00 | O |
| ATOM | 3458 | N    | LEU | 225 | 30.478 | 35.794 | 51.931 | 1.00 | 0.00 | N |
| ATOM | 3459 | H    | LEU | 225 | 30.170 | 36.204 | 52.802 | 1.00 | 0.00 | H |
| ATOM | 3460 | CA   | LEU | 225 | 31.601 | 34.848 | 52.029 | 1.00 | 0.00 | C |
| ATOM | 3461 | HA   | LEU | 225 | 32.399 | 35.185 | 51.373 | 1.00 | 0.00 | H |
| ATOM | 3462 | CB   | LEU | 225 | 32.110 | 34.815 | 53.476 | 1.00 | 0.00 | C |
| ATOM | 3463 | HB2  | LEU | 225 | 31.269 | 34.606 | 54.139 | 1.00 | 0.00 | H |
| ATOM | 3464 | HB3  | LEU | 225 | 32.807 | 33.979 | 53.566 | 1.00 | 0.00 | H |
| ATOM | 3465 | CG   | LEU | 225 | 32.824 | 36.083 | 53.959 | 1.00 | 0.00 | C |
| ATOM | 3466 | HG   | LEU | 225 | 32.118 | 36.912 | 53.951 | 1.00 | 0.00 | H |
| ATOM | 3467 | CD1  | LEU | 225 | 33.309 | 35.881 | 55.388 | 1.00 | 0.00 | C |
| ATOM | 3468 | HD11 | LEU | 225 | 33.729 | 36.801 | 55.791 | 1.00 | 0.00 | H |
| ATOM | 3469 | HD12 | LEU | 225 | 32.472 | 35.569 | 56.008 | 1.00 | 0.00 | H |
| ATOM | 3470 | HD13 | LEU | 225 | 34.072 | 35.101 | 55.417 | 1.00 | 0.00 | H |
| ATOM | 3471 | CD2  | LEU | 225 | 33.985 | 36.398 | 53.027 | 1.00 | 0.00 | C |
| ATOM | 3472 | HD21 | LEU | 225 | 34.623 | 37.154 | 53.482 | 1.00 | 0.00 | H |
| ATOM | 3473 | HD22 | LEU | 225 | 34.577 | 35.502 | 52.842 | 1.00 | 0.00 | H |
| ATOM | 3474 | HD23 | LEU | 225 | 33.620 | 36.794 | 52.082 | 1.00 | 0.00 | H |
| ATOM | 3475 | C    | LEU | 225 | 31.228 | 33.400 | 51.571 | 1.00 | 0.00 | C |
| ATOM | 3476 | O    | LEU | 225 | 31.974 | 32.921 | 50.721 | 1.00 | 0.00 | O |
| ATOM | 3477 | N    | GLU | 226 | 30.060 | 32.902 | 51.903 | 1.00 | 0.00 | N |
| ATOM | 3478 | H    | GLU | 226 | 29.454 | 33.384 | 52.552 | 1.00 | 0.00 | H |

|      |      |     |     |     |        |        |        |      |      |   |
|------|------|-----|-----|-----|--------|--------|--------|------|------|---|
| ATOM | 3479 | CA  | GLU | 226 | 29.657 | 31.589 | 51.383 | 1.00 | 0.00 | C |
| ATOM | 3480 | HA  | GLU | 226 | 30.415 | 30.856 | 51.667 | 1.00 | 0.00 | H |
| ATOM | 3481 | CB  | GLU | 226 | 28.332 | 31.171 | 52.025 | 1.00 | 0.00 | C |
| ATOM | 3482 | HB2 | GLU | 226 | 27.613 | 31.980 | 51.892 | 1.00 | 0.00 | H |
| ATOM | 3483 | HB3 | GLU | 226 | 27.955 | 30.291 | 51.501 | 1.00 | 0.00 | H |
| ATOM | 3484 | CG  | GLU | 226 | 28.432 | 30.823 | 53.504 | 1.00 | 0.00 | C |
| ATOM | 3485 | HG2 | GLU | 226 | 29.096 | 29.964 | 53.618 | 1.00 | 0.00 | H |
| ATOM | 3486 | HG3 | GLU | 226 | 28.868 | 31.661 | 54.048 | 1.00 | 0.00 | H |
| ATOM | 3487 | CD  | GLU | 226 | 27.099 | 30.497 | 54.119 | 1.00 | 0.00 | C |
| ATOM | 3488 | OE1 | GLU | 226 | 26.107 | 30.624 | 53.443 | 1.00 | 0.00 | O |
| ATOM | 3489 | OE2 | GLU | 226 | 27.074 | 30.120 | 55.267 | 1.00 | 0.00 | O |
| ATOM | 3490 | C   | GLU | 226 | 29.516 | 31.536 | 49.852 | 1.00 | 0.00 | C |
| ATOM | 3491 | O   | GLU | 226 | 30.039 | 30.647 | 49.203 | 1.00 | 0.00 | O |
| ATOM | 3492 | N   | ARG | 227 | 28.961 | 32.649 | 49.307 | 1.00 | 0.00 | N |
| ATOM | 3493 | H   | ARG | 227 | 28.620 | 33.399 | 49.892 | 1.00 | 0.00 | H |
| ATOM | 3494 | CA  | ARG | 227 | 28.727 | 32.677 | 47.882 | 1.00 | 0.00 | C |
| ATOM | 3495 | HA  | ARG | 227 | 28.337 | 31.710 | 47.558 | 1.00 | 0.00 | H |
| ATOM | 3496 | CB  | ARG | 227 | 27.706 | 33.749 | 47.531 | 1.00 | 0.00 | C |
| ATOM | 3497 | HB2 | ARG | 227 | 28.045 | 34.708 | 47.922 | 1.00 | 0.00 | H |
| ATOM | 3498 | HB3 | ARG | 227 | 27.648 | 33.806 | 46.446 | 1.00 | 0.00 | H |
| ATOM | 3499 | CG  | ARG | 227 | 26.295 | 33.475 | 48.024 | 1.00 | 0.00 | C |
| ATOM | 3500 | HG2 | ARG | 227 | 25.949 | 32.534 | 47.593 | 1.00 | 0.00 | H |
| ATOM | 3501 | HG3 | ARG | 227 | 26.297 | 33.376 | 49.109 | 1.00 | 0.00 | H |
| ATOM | 3502 | CD  | ARG | 227 | 25.357 | 34.560 | 47.638 | 1.00 | 0.00 | C |
| ATOM | 3503 | HD2 | ARG | 227 | 25.703 | 35.496 | 48.080 | 1.00 | 0.00 | H |
| ATOM | 3504 | HD3 | ARG | 227 | 25.358 | 34.659 | 46.552 | 1.00 | 0.00 | H |
| ATOM | 3505 | NE  | ARG | 227 | 23.999 | 34.288 | 48.081 | 1.00 | 0.00 | N |
| ATOM | 3506 | HE  | ARG | 227 | 23.826 | 33.381 | 48.491 | 1.00 | 0.00 | H |
| ATOM | 3507 | CZ  | ARG | 227 | 22.972 | 35.153 | 47.976 | 1.00 | 0.00 | C |
| ATOM | 3508 | NH1 | ARG | 227 | 23.163 | 36.339 | 47.442 | 1.00 | 0.00 | N |



|      |      |      |     |     |        |        |        |      |      |   |
|------|------|------|-----|-----|--------|--------|--------|------|------|---|
| ATOM | 3509 | HH11 | ARG | 227 | 22.387 | 36.970 | 47.319 | 1.00 | 0.00 | H |
| ATOM | 3510 | HH12 | ARG | 227 | 24.082 | 36.591 | 47.113 | 1.00 | 0.00 | H |
| ATOM | 3511 | NH2  | ARG | 227 | 21.772 | 34.809 | 48.410 | 1.00 | 0.00 | N |
| ATOM | 3512 | HH21 | ARG | 227 | 21.004 | 35.460 | 48.357 | 1.00 | 0.00 | H |
| ATOM | 3513 | HH22 | ARG | 227 | 21.622 | 33.885 | 48.788 | 1.00 | 0.00 | H |
| ATOM | 3514 | C    | ARG | 227 | 30.021 | 32.935 | 47.123 | 1.00 | 0.00 | C |
| ATOM | 3515 | O    | ARG | 227 | 30.392 | 32.154 | 46.168 | 1.00 | 0.00 | O |
| ATOM | 3516 | N    | LEU | 228 | 30.867 | 33.750 | 47.690 | 1.00 | 0.00 | N |
| ATOM | 3517 | H    | LEU | 228 | 30.570 | 34.215 | 48.535 | 1.00 | 0.00 | H |
| ATOM | 3518 | CA   | LEU | 228 | 32.249 | 34.093 | 47.186 | 1.00 | 0.00 | C |
| ATOM | 3519 | HA   | LEU | 228 | 32.166 | 34.481 | 46.172 | 1.00 | 0.00 | H |
| ATOM | 3520 | CB   | LEU | 228 | 32.904 | 35.142 | 48.094 | 1.00 | 0.00 | C |
| ATOM | 3521 | HB2  | LEU | 228 | 32.755 | 34.832 | 49.127 | 1.00 | 0.00 | H |
| ATOM | 3522 | HB3  | LEU | 228 | 33.981 | 35.132 | 47.918 | 1.00 | 0.00 | H |
| ATOM | 3523 | CG   | LEU | 228 | 32.402 | 36.581 | 47.919 | 1.00 | 0.00 | C |
| ATOM | 3524 | HG   | LEU | 228 | 31.317 | 36.596 | 47.892 | 1.00 | 0.00 | H |
| ATOM | 3525 | CD1  | LEU | 228 | 32.874 | 37.430 | 49.090 | 1.00 | 0.00 | C |
| ATOM | 3526 | HD11 | LEU | 228 | 32.493 | 38.444 | 48.982 | 1.00 | 0.00 | H |
| ATOM | 3527 | HD12 | LEU | 228 | 32.493 | 37.026 | 50.025 | 1.00 | 0.00 | H |
| ATOM | 3528 | HD13 | LEU | 228 | 33.964 | 37.452 | 49.125 | 1.00 | 0.00 | H |
| ATOM | 3529 | CD2  | LEU | 228 | 32.911 | 37.139 | 46.598 | 1.00 | 0.00 | C |
| ATOM | 3530 | HD21 | LEU | 228 | 32.649 | 38.188 | 46.525 | 1.00 | 0.00 | H |
| ATOM | 3531 | HD22 | LEU | 228 | 33.998 | 37.060 | 46.550 | 1.00 | 0.00 | H |
| ATOM | 3532 | HD23 | LEU | 228 | 32.489 | 36.606 | 45.751 | 1.00 | 0.00 | H |
| ATOM | 3533 | C    | LEU | 228 | 33.151 | 32.799 | 47.122 | 1.00 | 0.00 | C |
| ATOM | 3534 | O    | LEU | 228 | 34.022 | 32.772 | 46.304 | 1.00 | 0.00 | O |
| ATOM | 3535 | N    | VAL | 229 | 33.036 | 31.786 | 48.026 | 1.00 | 0.00 | N |
| ATOM | 3536 | H    | VAL | 229 | 32.328 | 31.868 | 48.744 | 1.00 | 0.00 | H |
| ATOM | 3537 | CA   | VAL | 229 | 33.869 | 30.503 | 48.036 | 1.00 | 0.00 | C |
| ATOM | 3538 | HA   | VAL | 229 | 34.882 | 30.727 | 47.699 | 1.00 | 0.00 | H |

|      |      |      |     |     |        |        |        |      |      |   |
|------|------|------|-----|-----|--------|--------|--------|------|------|---|
| ATOM | 3539 | CB   | VAL | 229 | 33.933 | 29.876 | 49.442 | 1.00 | 0.00 | C |
| ATOM | 3540 | HB   | VAL | 229 | 32.918 | 29.697 | 49.801 | 1.00 | 0.00 | H |
| ATOM | 3541 | CG1  | VAL | 229 | 34.671 | 28.547 | 49.399 | 1.00 | 0.00 | C |
| ATOM | 3542 | HG11 | VAL | 229 | 34.786 | 28.160 | 50.412 | 1.00 | 0.00 | H |
| ATOM | 3543 | HG12 | VAL | 229 | 34.111 | 27.812 | 48.824 | 1.00 | 0.00 | H |
| ATOM | 3544 | HG13 | VAL | 229 | 35.659 | 28.676 | 48.956 | 1.00 | 0.00 | H |
| ATOM | 3545 | CG2  | VAL | 229 | 34.609 | 30.838 | 50.407 | 1.00 | 0.00 | C |
| ATOM | 3546 | HG21 | VAL | 229 | 34.591 | 30.419 | 51.413 | 1.00 | 0.00 | H |
| ATOM | 3547 | HG22 | VAL | 229 | 35.638 | 31.011 | 50.096 | 1.00 | 0.00 | H |
| ATOM | 3548 | HG23 | VAL | 229 | 34.104 | 31.797 | 50.430 | 1.00 | 0.00 | H |
| ATOM | 3549 | C    | VAL | 229 | 33.239 | 29.494 | 47.064 | 1.00 | 0.00 | C |
| ATOM | 3550 | O    | VAL | 229 | 33.849 | 28.945 | 46.160 | 1.00 | 0.00 | O |
| ATOM | 3551 | N    | GLU | 230 | 31.963 | 29.263 | 47.185 | 1.00 | 0.00 | N |
| ATOM | 3552 | H    | GLU | 230 | 31.450 | 29.773 | 47.892 | 1.00 | 0.00 | H |
| ATOM | 3553 | CA   | GLU | 230 | 31.229 | 28.226 | 46.486 | 1.00 | 0.00 | C |
| ATOM | 3554 | HA   | GLU | 230 | 31.920 | 27.418 | 46.242 | 1.00 | 0.00 | H |
| ATOM | 3555 | CB   | GLU | 230 | 30.209 | 27.653 | 47.472 | 1.00 | 0.00 | C |
| ATOM | 3556 | HB2  | GLU | 230 | 29.560 | 28.455 | 47.826 | 1.00 | 0.00 | H |
| ATOM | 3557 | HB3  | GLU | 230 | 29.589 | 26.932 | 46.938 | 1.00 | 0.00 | H |
| ATOM | 3558 | CG   | GLU | 230 | 30.822 | 26.923 | 48.658 | 1.00 | 0.00 | C |
| ATOM | 3559 | HG2  | GLU | 230 | 31.466 | 26.127 | 48.282 | 1.00 | 0.00 | H |
| ATOM | 3560 | HG3  | GLU | 230 | 31.433 | 27.615 | 49.239 | 1.00 | 0.00 | H |
| ATOM | 3561 | CD   | GLU | 230 | 29.791 | 26.318 | 49.570 | 1.00 | 0.00 | C |
| ATOM | 3562 | OE1  | GLU | 230 | 28.624 | 26.500 | 49.319 | 1.00 | 0.00 | O |
| ATOM | 3563 | OE2  | GLU | 230 | 30.171 | 25.673 | 50.519 | 1.00 | 0.00 | O |
| ATOM | 3564 | C    | GLU | 230 | 30.493 | 28.594 | 45.140 | 1.00 | 0.00 | C |
| ATOM | 3565 | O    | GLU | 230 | 29.840 | 27.765 | 44.467 | 1.00 | 0.00 | O |
| ATOM | 3566 | N    | ALA | 231 | 30.608 | 29.831 | 44.705 | 1.00 | 0.00 | N |
| ATOM | 3567 | H    | ALA | 231 | 31.108 | 30.491 | 45.284 | 1.00 | 0.00 | H |
| ATOM | 3568 | CA   | ALA | 231 | 30.141 | 30.327 | 43.419 | 1.00 | 0.00 | C |

|      |      |     |     |     |        |        |        |      |      |   |
|------|------|-----|-----|-----|--------|--------|--------|------|------|---|
| ATOM | 3569 | HA  | ALA | 231 | 29.071 | 30.113 | 43.406 | 1.00 | 0.00 | H |
| ATOM | 3570 | CB  | ALA | 231 | 30.238 | 31.849 | 43.395 | 1.00 | 0.00 | C |
| ATOM | 3571 | HB1 | ALA | 231 | 30.078 | 32.220 | 42.382 | 1.00 | 0.00 | H |
| ATOM | 3572 | HB2 | ALA | 231 | 29.449 | 32.276 | 44.009 | 1.00 | 0.00 | H |
| ATOM | 3573 | HB3 | ALA | 231 | 31.225 | 32.172 | 43.727 | 1.00 | 0.00 | H |
| ATOM | 3574 | C   | ALA | 231 | 30.649 | 29.727 | 42.125 | 1.00 | 0.00 | C |
| ATOM | 3575 | O   | ALA | 231 | 29.954 | 29.730 | 41.104 | 1.00 | 0.00 | O |
| ATOM | 3576 | N   | PHE | 232 | 31.883 | 29.198 | 42.106 | 1.00 | 0.00 | N |
| ATOM | 3577 | H   | PHE | 232 | 32.425 | 29.206 | 42.957 | 1.00 | 0.00 | H |
| ATOM | 3578 | CA  | PHE | 232 | 32.510 | 28.626 | 40.908 | 1.00 | 0.00 | C |
| ATOM | 3579 | HA  | PHE | 232 | 31.856 | 28.802 | 40.052 | 1.00 | 0.00 | H |
| ATOM | 3580 | CB  | PHE | 232 | 33.797 | 29.403 | 40.626 | 1.00 | 0.00 | C |
| ATOM | 3581 | HB2 | PHE | 232 | 34.486 | 29.267 | 41.461 | 1.00 | 0.00 | H |
| ATOM | 3582 | HB3 | PHE | 232 | 34.274 | 28.988 | 39.737 | 1.00 | 0.00 | H |
| ATOM | 3583 | CG  | PHE | 232 | 33.582 | 30.874 | 40.410 | 1.00 | 0.00 | C |
| ATOM | 3584 | CD1 | PHE | 232 | 33.565 | 31.752 | 41.484 | 1.00 | 0.00 | C |
| ATOM | 3585 | HD1 | PHE | 232 | 33.722 | 31.383 | 42.487 | 1.00 | 0.00 | H |
| ATOM | 3586 | CE1 | PHE | 232 | 33.367 | 33.106 | 41.286 | 1.00 | 0.00 | C |
| ATOM | 3587 | HE1 | PHE | 232 | 33.340 | 33.779 | 42.130 | 1.00 | 0.00 | H |
| ATOM | 3588 | CZ  | PHE | 232 | 33.184 | 33.597 | 40.011 | 1.00 | 0.00 | C |
| ATOM | 3589 | HZ  | PHE | 232 | 33.037 | 34.654 | 39.846 | 1.00 | 0.00 | H |
| ATOM | 3590 | CE2 | PHE | 232 | 33.199 | 32.735 | 38.933 | 1.00 | 0.00 | C |
| ATOM | 3591 | HE2 | PHE | 232 | 33.065 | 33.118 | 37.935 | 1.00 | 0.00 | H |
| ATOM | 3592 | CD2 | PHE | 232 | 33.396 | 31.383 | 39.134 | 1.00 | 0.00 | C |
| ATOM | 3593 | HD2 | PHE | 232 | 33.384 | 30.716 | 38.284 | 1.00 | 0.00 | H |
| ATOM | 3594 | C   | PHE | 232 | 32.849 | 27.117 | 40.910 | 1.00 | 0.00 | C |
| ATOM | 3595 | O   | PHE | 232 | 33.269 | 26.508 | 41.923 | 1.00 | 0.00 | O |
| ATOM | 3596 | N   | GLN | 233 | 32.693 | 26.515 | 39.735 | 1.00 | 0.00 | N |
| ATOM | 3597 | H   | GLN | 233 | 32.337 | 27.080 | 38.975 | 1.00 | 0.00 | H |
| ATOM | 3598 | CA  | GLN | 233 | 33.073 | 25.136 | 39.361 | 1.00 | 0.00 | C |

|      |      |      |     |     |        |        |        |      |      |   |
|------|------|------|-----|-----|--------|--------|--------|------|------|---|
| ATOM | 3599 | HA   | GLN | 233 | 33.286 | 24.564 | 40.266 | 1.00 | 0.00 | H |
| ATOM | 3600 | CB   | GLN | 233 | 31.962 | 24.423 | 38.585 | 1.00 | 0.00 | C |
| ATOM | 3601 | HB2  | GLN | 233 | 31.677 | 25.028 | 37.729 | 1.00 | 0.00 | H |
| ATOM | 3602 | HB3  | GLN | 233 | 32.347 | 23.467 | 38.229 | 1.00 | 0.00 | H |
| ATOM | 3603 | CG   | GLN | 233 | 30.704 | 24.162 | 39.396 | 1.00 | 0.00 | C |
| ATOM | 3604 | HG2  | GLN | 233 | 30.988 | 23.776 | 40.376 | 1.00 | 0.00 | H |
| ATOM | 3605 | HG3  | GLN | 233 | 30.169 | 25.101 | 39.546 | 1.00 | 0.00 | H |
| ATOM | 3606 | CD   | GLN | 233 | 29.787 | 23.153 | 38.732 | 1.00 | 0.00 | C |
| ATOM | 3607 | OE1  | GLN | 233 | 28.742 | 23.646 | 38.077 | 1.00 | 0.00 | O |
| ATOM | 3608 | NE2  | GLN | 233 | 30.014 | 21.943 | 38.808 | 1.00 | 0.00 | N |
| ATOM | 3609 | HE21 | GLN | 233 | 30.810 | 21.612 | 39.330 | 1.00 | 0.00 | H |
| ATOM | 3610 | HE22 | GLN | 233 | 29.402 | 21.297 | 38.335 | 1.00 | 0.00 | H |
| ATOM | 3611 | C    | GLN | 233 | 34.312 | 25.206 | 38.532 | 1.00 | 0.00 | C |
| ATOM | 3612 | O    | GLN | 233 | 34.609 | 26.229 | 37.840 | 1.00 | 0.00 | O |
| ATOM | 3613 | N    | ARG | 234 | 34.986 | 24.090 | 38.521 | 1.00 | 0.00 | N |
| ATOM | 3614 | H    | ARG | 234 | 34.565 | 23.335 | 39.043 | 1.00 | 0.00 | H |
| ATOM | 3615 | CA   | ARG | 234 | 36.321 | 23.755 | 37.968 | 1.00 | 0.00 | C |
| ATOM | 3616 | HA   | ARG | 234 | 36.613 | 24.566 | 37.299 | 1.00 | 0.00 | H |
| ATOM | 3617 | CB   | ARG | 234 | 37.333 | 23.710 | 39.104 | 1.00 | 0.00 | C |
| ATOM | 3618 | HB2  | ARG | 234 | 38.317 | 23.538 | 38.689 | 1.00 | 0.00 | H |
| ATOM | 3619 | HB3  | ARG | 234 | 37.340 | 24.686 | 39.590 | 1.00 | 0.00 | H |
| ATOM | 3620 | CG   | ARG | 234 | 37.069 | 22.641 | 40.153 | 1.00 | 0.00 | C |
| ATOM | 3621 | HG2  | ARG | 234 | 36.059 | 22.749 | 40.549 | 1.00 | 0.00 | H |
| ATOM | 3622 | HG3  | ARG | 234 | 37.163 | 21.661 | 39.689 | 1.00 | 0.00 | H |
| ATOM | 3623 | CD   | ARG | 234 | 38.030 | 22.732 | 41.283 | 1.00 | 0.00 | C |
| ATOM | 3624 | HD2  | ARG | 234 | 39.039 | 22.737 | 40.874 | 1.00 | 0.00 | H |
| ATOM | 3625 | HD3  | ARG | 234 | 37.858 | 23.656 | 41.837 | 1.00 | 0.00 | H |
| ATOM | 3626 | NE   | ARG | 234 | 37.924 | 21.591 | 42.178 | 1.00 | 0.00 | N |
| ATOM | 3627 | HE   | ARG | 234 | 37.119 | 20.989 | 42.065 | 1.00 | 0.00 | H |
| ATOM | 3628 | CZ   | ARG | 234 | 38.803 | 21.303 | 43.158 | 1.00 | 0.00 | C |

|      |      |      |     |     |        |        |        |      |      |   |
|------|------|------|-----|-----|--------|--------|--------|------|------|---|
| ATOM | 3629 | NH1  | ARG | 234 | 39.844 | 22.080 | 43.355 | 1.00 | 0.00 | N |
| ATOM | 3630 | HH11 | ARG | 234 | 39.955 | 22.916 | 42.802 | 1.00 | 0.00 | H |
| ATOM | 3631 | HH12 | ARG | 234 | 40.476 | 21.881 | 44.114 | 1.00 | 0.00 | H |
| ATOM | 3632 | NH2  | ARG | 234 | 38.618 | 20.239 | 43.920 | 1.00 | 0.00 | N |
| ATOM | 3633 | HH21 | ARG | 234 | 39.277 | 20.014 | 44.652 | 1.00 | 0.00 | H |
| ATOM | 3634 | HH22 | ARG | 234 | 37.811 | 19.648 | 43.771 | 1.00 | 0.00 | H |
| ATOM | 3635 | C    | ARG | 234 | 36.445 | 22.439 | 37.180 | 1.00 | 0.00 | C |
| ATOM | 3636 | O    | ARG | 234 | 35.659 | 21.504 | 37.326 | 1.00 | 0.00 | O |
| ATOM | 3637 | N    | ALA | 235 | 37.505 | 22.344 | 36.399 | 1.00 | 0.00 | N |
| ATOM | 3638 | H    | ALA | 235 | 38.101 | 23.158 | 36.373 | 1.00 | 0.00 | H |
| ATOM | 3639 | CA   | ALA | 235 | 37.934 | 21.286 | 35.552 | 1.00 | 0.00 | C |
| ATOM | 3640 | HA   | ALA | 235 | 37.038 | 20.893 | 35.069 | 1.00 | 0.00 | H |
| ATOM | 3641 | CB   | ALA | 235 | 38.798 | 21.812 | 34.455 | 1.00 | 0.00 | C |
| ATOM | 3642 | HB1  | ALA | 235 | 39.117 | 20.994 | 33.809 | 1.00 | 0.00 | H |
| ATOM | 3643 | HB2  | ALA | 235 | 38.234 | 22.513 | 33.845 | 1.00 | 0.00 | H |
| ATOM | 3644 | HB3  | ALA | 235 | 39.678 | 22.305 | 34.869 | 1.00 | 0.00 | H |
| ATOM | 3645 | C    | ALA | 235 | 38.529 | 20.092 | 36.374 | 1.00 | 0.00 | C |
| ATOM | 3646 | O    | ALA | 235 | 39.532 | 19.557 | 35.947 | 1.00 | 0.00 | O |
| ATOM | 3647 | N    | ARG | 236 | 37.846 | 19.634 | 37.409 | 1.00 | 0.00 | N |
| ATOM | 3648 | H    | ARG | 236 | 36.986 | 20.115 | 37.637 | 1.00 | 0.00 | H |
| ATOM | 3649 | CA   | ARG | 236 | 38.171 | 18.488 | 38.284 | 1.00 | 0.00 | C |
| ATOM | 3650 | HA   | ARG | 236 | 38.186 | 17.591 | 37.665 | 1.00 | 0.00 | H |
| ATOM | 3651 | CB   | ARG | 236 | 39.557 | 18.683 | 38.881 | 1.00 | 0.00 | C |
| ATOM | 3652 | HB2  | ARG | 236 | 39.799 | 17.797 | 39.468 | 1.00 | 0.00 | H |
| ATOM | 3653 | HB3  | ARG | 236 | 40.302 | 18.725 | 38.090 | 1.00 | 0.00 | H |
| ATOM | 3654 | CG   | ARG | 236 | 39.696 | 19.895 | 39.790 | 1.00 | 0.00 | C |
| ATOM | 3655 | HG2  | ARG | 236 | 39.479 | 20.810 | 39.237 | 1.00 | 0.00 | H |
| ATOM | 3656 | HG3  | ARG | 236 | 38.987 | 19.795 | 40.608 | 1.00 | 0.00 | H |
| ATOM | 3657 | CD   | ARG | 236 | 41.058 | 19.988 | 40.375 | 1.00 | 0.00 | C |
| ATOM | 3658 | HD2  | ARG | 236 | 41.079 | 20.814 | 41.087 | 1.00 | 0.00 | H |

|      |      |      |     |     |        |        |        |      |      |   |
|------|------|------|-----|-----|--------|--------|--------|------|------|---|
| ATOM | 3659 | HD3  | ARG | 236 | 41.270 | 19.062 | 40.912 | 1.00 | 0.00 | H |
| ATOM | 3660 | NE   | ARG | 236 | 42.070 | 20.226 | 39.358 | 1.00 | 0.00 | N |
| ATOM | 3661 | HE   | ARG | 236 | 41.753 | 20.589 | 38.471 | 1.00 | 0.00 | H |
| ATOM | 3662 | CZ   | ARG | 236 | 43.384 | 19.969 | 39.512 | 1.00 | 0.00 | C |
| ATOM | 3663 | NH1  | ARG | 236 | 43.828 | 19.467 | 40.643 | 1.00 | 0.00 | N |
| ATOM | 3664 | HH11 | ARG | 236 | 44.812 | 19.282 | 40.764 | 1.00 | 0.00 | H |
| ATOM | 3665 | HH12 | ARG | 236 | 43.184 | 19.242 | 41.388 | 1.00 | 0.00 | H |
| ATOM | 3666 | NH2  | ARG | 236 | 44.226 | 20.221 | 38.525 | 1.00 | 0.00 | N |
| ATOM | 3667 | HH21 | ARG | 236 | 43.878 | 20.572 | 37.645 | 1.00 | 0.00 | H |
| ATOM | 3668 | HH22 | ARG | 236 | 45.216 | 20.075 | 38.653 | 1.00 | 0.00 | H |
| ATOM | 3669 | C    | ARG | 236 | 37.112 | 18.280 | 39.450 | 1.00 | 0.00 | C |
| ATOM | 3670 | O    | ARG | 236 | 36.345 | 19.210 | 39.659 | 1.00 | 0.00 | O |
| ATOM | 3671 | N    | PRO | 237 | 36.939 | 17.098 | 40.109 | 1.00 | 0.00 | N |
| ATOM | 3672 | CD   | PRO | 237 | 37.739 | 15.916 | 39.854 | 1.00 | 0.00 | C |
| ATOM | 3673 | HD2  | PRO | 237 | 38.700 | 15.996 | 40.363 | 1.00 | 0.00 | H |
| ATOM | 3674 | HD3  | PRO | 237 | 37.869 | 15.725 | 38.789 | 1.00 | 0.00 | H |
| ATOM | 3675 | CG   | PRO | 237 | 36.892 | 14.807 | 40.496 | 1.00 | 0.00 | C |
| ATOM | 3676 | HG2  | PRO | 237 | 37.504 | 13.950 | 40.781 | 1.00 | 0.00 | H |
| ATOM | 3677 | HG3  | PRO | 237 | 36.098 | 14.501 | 39.812 | 1.00 | 0.00 | H |
| ATOM | 3678 | CB   | PRO | 237 | 36.302 | 15.491 | 41.695 | 1.00 | 0.00 | C |
| ATOM | 3679 | HB2  | PRO | 237 | 37.062 | 15.562 | 42.476 | 1.00 | 0.00 | H |
| ATOM | 3680 | HB3  | PRO | 237 | 35.424 | 14.962 | 42.066 | 1.00 | 0.00 | H |
| ATOM | 3681 | CA   | PRO | 237 | 35.946 | 16.844 | 41.165 | 1.00 | 0.00 | C |
| ATOM | 3682 | HA   | PRO | 237 | 34.971 | 16.774 | 40.678 | 1.00 | 0.00 | H |
| ATOM | 3683 | C    | PRO | 237 | 35.849 | 17.808 | 42.334 | 1.00 | 0.00 | C |
| ATOM | 3684 | O    | PRO | 237 | 36.788 | 18.147 | 42.980 | 1.00 | 0.00 | O |
| ATOM | 3685 | N    | GLY | 238 | 34.626 | 18.185 | 42.646 | 1.00 | 0.00 | N |
| ATOM | 3686 | H    | GLY | 238 | 33.843 | 17.863 | 42.096 | 1.00 | 0.00 | H |
| ATOM | 3687 | CA   | GLY | 238 | 34.359 | 19.136 | 43.803 | 1.00 | 0.00 | C |
| ATOM | 3688 | HA2  | GLY | 238 | 33.335 | 18.995 | 44.150 | 1.00 | 0.00 | H |

|      |      |      |     |     |        |        |        |      |      |   |
|------|------|------|-----|-----|--------|--------|--------|------|------|---|
| ATOM | 3689 | HA3  | GLY | 238 | 35.040 | 18.946 | 44.634 | 1.00 | 0.00 | H |
| ATOM | 3690 | C    | GLY | 238 | 34.534 | 20.577 | 43.303 | 1.00 | 0.00 | C |
| ATOM | 3691 | O    | GLY | 238 | 35.235 | 20.865 | 42.334 | 1.00 | 0.00 | O |
| ATOM | 3692 | N    | ASN | 239 | 34.079 | 21.479 | 44.147 | 1.00 | 0.00 | N |
| ATOM | 3693 | H    | ASN | 239 | 33.618 | 21.158 | 44.986 | 1.00 | 0.00 | H |
| ATOM | 3694 | CA   | ASN | 239 | 34.177 | 22.903 | 43.987 | 1.00 | 0.00 | C |
| ATOM | 3695 | HA   | ASN | 239 | 34.212 | 23.133 | 42.921 | 1.00 | 0.00 | H |
| ATOM | 3696 | CB   | ASN | 239 | 32.941 | 23.582 | 44.546 | 1.00 | 0.00 | C |
| ATOM | 3697 | HB2  | ASN | 239 | 32.910 | 24.641 | 44.287 | 1.00 | 0.00 | H |
| ATOM | 3698 | HB3  | ASN | 239 | 32.065 | 23.131 | 44.077 | 1.00 | 0.00 | H |
| ATOM | 3699 | CG   | ASN | 239 | 32.819 | 23.423 | 46.036 | 1.00 | 0.00 | C |
| ATOM | 3700 | OD1  | ASN | 239 | 33.795 | 23.094 | 46.720 | 1.00 | 0.00 | O |
| ATOM | 3701 | ND2  | ASN | 239 | 31.638 | 23.649 | 46.553 | 1.00 | 0.00 | N |
| ATOM | 3702 | HD21 | ASN | 239 | 30.870 | 23.941 | 45.967 | 1.00 | 0.00 | H |
| ATOM | 3703 | HD22 | ASN | 239 | 31.512 | 23.572 | 47.552 | 1.00 | 0.00 | H |
| ATOM | 3704 | C    | ASN | 239 | 35.381 | 23.487 | 44.602 | 1.00 | 0.00 | C |
| ATOM | 3705 | O    | ASN | 239 | 36.323 | 22.842 | 45.063 | 1.00 | 0.00 | O |
| ATOM | 3706 | N    | HID | 240 | 35.392 | 24.851 | 44.727 | 1.00 | 0.00 | N |
| ATOM | 3707 | H    | HID | 240 | 34.622 | 25.413 | 44.393 | 1.00 | 0.00 | H |
| ATOM | 3708 | CA   | HID | 240 | 36.597 | 25.525 | 45.257 | 1.00 | 0.00 | C |
| ATOM | 3709 | HA   | HID | 240 | 37.483 | 24.994 | 44.907 | 1.00 | 0.00 | H |
| ATOM | 3710 | CB   | HID | 240 | 36.677 | 26.950 | 44.700 | 1.00 | 0.00 | C |
| ATOM | 3711 | HB2  | HID | 240 | 35.742 | 27.472 | 44.905 | 1.00 | 0.00 | H |
| ATOM | 3712 | HB3  | HID | 240 | 37.477 | 27.500 | 45.197 | 1.00 | 0.00 | H |
| ATOM | 3713 | CG   | HID | 240 | 36.962 | 27.007 | 43.231 | 1.00 | 0.00 | C |
| ATOM | 3714 | ND1  | HID | 240 | 35.976 | 26.868 | 42.277 | 1.00 | 0.00 | N |
| ATOM | 3715 | HD1  | HID | 240 | 34.990 | 26.761 | 42.466 | 1.00 | 0.00 | H |
| ATOM | 3716 | CE1  | HID | 240 | 36.516 | 26.960 | 41.074 | 1.00 | 0.00 | C |
| ATOM | 3717 | HE1  | HID | 240 | 35.982 | 26.921 | 40.136 | 1.00 | 0.00 | H |
| ATOM | 3718 | NE2  | HID | 240 | 37.815 | 27.153 | 41.215 | 1.00 | 0.00 | N |

|      |      |      |     |     |        |        |        |      |      |   |
|------|------|------|-----|-----|--------|--------|--------|------|------|---|
| ATOM | 3719 | CD2  | HID | 240 | 38.120 | 27.186 | 42.554 | 1.00 | 0.00 | C |
| ATOM | 3720 | HD2  | HID | 240 | 39.098 | 27.329 | 42.986 | 1.00 | 0.00 | H |
| ATOM | 3721 | C    | HID | 240 | 36.688 | 25.594 | 46.789 | 1.00 | 0.00 | C |
| ATOM | 3722 | O    | HID | 240 | 37.692 | 26.163 | 47.290 | 1.00 | 0.00 | O |
| ATOM | 3723 | N    | ASN | 241 | 35.735 | 25.031 | 47.462 | 1.00 | 0.00 | N |
| ATOM | 3724 | H    | ASN | 241 | 34.990 | 24.567 | 46.965 | 1.00 | 0.00 | H |
| ATOM | 3725 | CA   | ASN | 241 | 35.678 | 25.008 | 48.969 | 1.00 | 0.00 | C |
| ATOM | 3726 | HA   | ASN | 241 | 36.047 | 25.959 | 49.357 | 1.00 | 0.00 | H |
| ATOM | 3727 | CB   | ASN | 241 | 34.275 | 24.778 | 49.499 | 1.00 | 0.00 | C |
| ATOM | 3728 | HB2  | ASN | 241 | 33.614 | 25.525 | 49.062 | 1.00 | 0.00 | H |
| ATOM | 3729 | HB3  | ASN | 241 | 33.915 | 23.795 | 49.200 | 1.00 | 0.00 | H |
| ATOM | 3730 | CG   | ASN | 241 | 34.200 | 24.873 | 50.998 | 1.00 | 0.00 | C |
| ATOM | 3731 | OD1  | ASN | 241 | 35.197 | 24.658 | 51.696 | 1.00 | 0.00 | O |
| ATOM | 3732 | ND2  | ASN | 241 | 33.037 | 25.192 | 51.505 | 1.00 | 0.00 | N |
| ATOM | 3733 | HD21 | ASN | 241 | 32.234 | 25.355 | 50.912 | 1.00 | 0.00 | H |
| ATOM | 3734 | HD22 | ASN | 241 | 32.939 | 25.244 | 52.507 | 1.00 | 0.00 | H |
| ATOM | 3735 | C    | ASN | 241 | 36.649 | 23.872 | 49.385 | 1.00 | 0.00 | C |
| ATOM | 3736 | O    | ASN | 241 | 36.369 | 22.660 | 49.377 | 1.00 | 0.00 | O |
| ATOM | 3737 | N    | GLY | 242 | 37.818 | 24.183 | 49.872 | 1.00 | 0.00 | N |
| ATOM | 3738 | H    | GLY | 242 | 38.043 | 25.161 | 49.998 | 1.00 | 0.00 | H |
| ATOM | 3739 | CA   | GLY | 242 | 38.893 | 23.198 | 50.116 | 1.00 | 0.00 | C |
| ATOM | 3740 | HA2  | GLY | 242 | 39.108 | 23.167 | 51.183 | 1.00 | 0.00 | H |
| ATOM | 3741 | HA3  | GLY | 242 | 38.611 | 22.196 | 49.794 | 1.00 | 0.00 | H |
| ATOM | 3742 | C    | GLY | 242 | 40.195 | 23.599 | 49.345 | 1.00 | 0.00 | C |
| ATOM | 3743 | O    | GLY | 242 | 41.219 | 22.927 | 49.467 | 1.00 | 0.00 | O |
| ATOM | 3744 | N    | ASN | 243 | 40.219 | 24.753 | 48.595 | 1.00 | 0.00 | N |
| ATOM | 3745 | H    | ASN | 243 | 39.387 | 25.327 | 48.559 | 1.00 | 0.00 | H |
| ATOM | 3746 | CA   | ASN | 243 | 41.338 | 25.207 | 47.861 | 1.00 | 0.00 | C |
| ATOM | 3747 | HA   | ASN | 243 | 41.758 | 24.358 | 47.321 | 1.00 | 0.00 | H |
| ATOM | 3748 | CB   | ASN | 243 | 40.867 | 26.217 | 46.831 | 1.00 | 0.00 | C |



|      |      |      |     |     |        |        |        |      |      |   |
|------|------|------|-----|-----|--------|--------|--------|------|------|---|
| ATOM | 3749 | HB2  | ASN | 243 | 41.720 | 26.505 | 46.216 | 1.00 | 0.00 | H |
| ATOM | 3750 | HB3  | ASN | 243 | 40.123 | 25.762 | 46.176 | 1.00 | 0.00 | H |
| ATOM | 3751 | CG   | ASN | 243 | 40.288 | 27.454 | 47.458 | 1.00 | 0.00 | C |
| ATOM | 3752 | OD1  | ASN | 243 | 40.020 | 27.487 | 48.664 | 1.00 | 0.00 | O |
| ATOM | 3753 | ND2  | ASN | 243 | 40.089 | 28.474 | 46.662 | 1.00 | 0.00 | N |
| ATOM | 3754 | HD21 | ASN | 243 | 40.338 | 28.408 | 45.688 | 1.00 | 0.00 | H |
| ATOM | 3755 | HD22 | ASN | 243 | 39.737 | 29.339 | 47.044 | 1.00 | 0.00 | H |
| ATOM | 3756 | C    | ASN | 243 | 42.466 | 25.797 | 48.754 | 1.00 | 0.00 | C |
| ATOM | 3757 | O    | ASN | 243 | 42.843 | 26.970 | 48.605 | 1.00 | 0.00 | O |
| ATOM | 3758 | N    | HIE | 244 | 43.014 | 24.930 | 49.647 | 1.00 | 0.00 | N |
| ATOM | 3759 | H    | HIE | 244 | 42.702 | 23.972 | 49.692 | 1.00 | 0.00 | H |
| ATOM | 3760 | CA   | HIE | 244 | 44.003 | 25.353 | 50.596 | 1.00 | 0.00 | C |
| ATOM | 3761 | HA   | HIE | 244 | 44.481 | 26.258 | 50.221 | 1.00 | 0.00 | H |
| ATOM | 3762 | CB   | HIE | 244 | 43.294 | 25.721 | 51.903 | 1.00 | 0.00 | C |
| ATOM | 3763 | HB2  | HIE | 244 | 43.868 | 26.484 | 52.425 | 1.00 | 0.00 | H |
| ATOM | 3764 | HB3  | HIE | 244 | 42.316 | 26.142 | 51.673 | 1.00 | 0.00 | H |
| ATOM | 3765 | CG   | HIE | 244 | 43.106 | 24.562 | 52.832 | 1.00 | 0.00 | C |
| ATOM | 3766 | ND1  | HIE | 244 | 43.896 | 24.365 | 53.945 | 1.00 | 0.00 | N |
| ATOM | 3767 | CE1  | HIE | 244 | 43.502 | 23.270 | 54.572 | 1.00 | 0.00 | C |
| ATOM | 3768 | HE1  | HIE | 244 | 43.936 | 22.873 | 55.478 | 1.00 | 0.00 | H |
| ATOM | 3769 | NE2  | HIE | 244 | 42.487 | 22.751 | 53.906 | 1.00 | 0.00 | N |
| ATOM | 3770 | HE2  | HIE | 244 | 41.982 | 21.916 | 54.164 | 1.00 | 0.00 | H |
| ATOM | 3771 | CD2  | HIE | 244 | 42.219 | 23.539 | 52.814 | 1.00 | 0.00 | C |
| ATOM | 3772 | HD2  | HIE | 244 | 41.457 | 23.367 | 52.071 | 1.00 | 0.00 | H |
| ATOM | 3773 | C    | HIE | 244 | 45.136 | 24.347 | 50.899 | 1.00 | 0.00 | C |
| ATOM | 3774 | O    | HIE | 244 | 44.930 | 23.103 | 50.733 | 1.00 | 0.00 | O |
| ATOM | 3775 | N    | ARG | 245 | 46.384 | 24.742 | 51.253 | 1.00 | 0.00 | N |
| ATOM | 3776 | H    | ARG | 245 | 46.578 | 25.735 | 51.272 | 1.00 | 0.00 | H |
| ATOM | 3777 | CA   | ARG | 245 | 47.352 | 23.907 | 51.868 | 1.00 | 0.00 | C |
| ATOM | 3778 | HA   | ARG | 245 | 47.098 | 22.867 | 51.675 | 1.00 | 0.00 | H |

|      |      |      |     |     |        |        |        |      |      |   |
|------|------|------|-----|-----|--------|--------|--------|------|------|---|
| ATOM | 3779 | CB   | ARG | 245 | 48.697 | 24.162 | 51.206 | 1.00 | 0.00 | C |
| ATOM | 3780 | HB2  | ARG | 245 | 48.588 | 23.996 | 50.132 | 1.00 | 0.00 | H |
| ATOM | 3781 | HB3  | ARG | 245 | 48.971 | 25.209 | 51.355 | 1.00 | 0.00 | H |
| ATOM | 3782 | CG   | ARG | 245 | 49.835 | 23.288 | 51.710 | 1.00 | 0.00 | C |
| ATOM | 3783 | HG2  | ARG | 245 | 49.991 | 23.465 | 52.772 | 1.00 | 0.00 | H |
| ATOM | 3784 | HG3  | ARG | 245 | 49.569 | 22.241 | 51.566 | 1.00 | 0.00 | H |
| ATOM | 3785 | CD   | ARG | 245 | 51.104 | 23.572 | 50.992 | 1.00 | 0.00 | C |
| ATOM | 3786 | HD2  | ARG | 245 | 50.956 | 23.402 | 49.930 | 1.00 | 0.00 | H |
| ATOM | 3787 | HD3  | ARG | 245 | 51.379 | 24.615 | 51.157 | 1.00 | 0.00 | H |
| ATOM | 3788 | NE   | ARG | 245 | 52.185 | 22.709 | 51.442 | 1.00 | 0.00 | N |
| ATOM | 3789 | HE   | ARG | 245 | 51.957 | 22.016 | 52.140 | 1.00 | 0.00 | H |
| ATOM | 3790 | CZ   | ARG | 245 | 53.461 | 22.796 | 51.017 | 1.00 | 0.00 | C |
| ATOM | 3791 | NH1  | ARG | 245 | 53.799 | 23.711 | 50.136 | 1.00 | 0.00 | N |
| ATOM | 3792 | HH11 | ARG | 245 | 54.750 | 23.791 | 49.813 | 1.00 | 0.00 | H |
| ATOM | 3793 | HH12 | ARG | 245 | 53.098 | 24.360 | 49.808 | 1.00 | 0.00 | H |
| ATOM | 3794 | NH2  | ARG | 245 | 54.373 | 21.963 | 51.488 | 1.00 | 0.00 | N |
| ATOM | 3795 | HH21 | ARG | 245 | 54.098 | 21.218 | 52.110 | 1.00 | 0.00 | H |
| ATOM | 3796 | HH22 | ARG | 245 | 55.338 | 22.075 | 51.217 | 1.00 | 0.00 | H |
| ATOM | 3797 | C    | ARG | 245 | 47.465 | 24.111 | 53.432 | 1.00 | 0.00 | C |
| ATOM | 3798 | O    | ARG | 245 | 47.581 | 25.256 | 53.813 | 1.00 | 0.00 | O |
| ATOM | 3799 | N    | PRO | 246 | 47.460 | 23.086 | 54.295 | 1.00 | 0.00 | N |
| ATOM | 3800 | CD   | PRO | 246 | 47.246 | 21.662 | 53.952 | 1.00 | 0.00 | C |
| ATOM | 3801 | HD2  | PRO | 246 | 47.891 | 21.341 | 53.134 | 1.00 | 0.00 | H |
| ATOM | 3802 | HD3  | PRO | 246 | 46.196 | 21.498 | 53.708 | 1.00 | 0.00 | H |
| ATOM | 3803 | CG   | PRO | 246 | 47.609 | 20.939 | 55.221 | 1.00 | 0.00 | C |
| ATOM | 3804 | HG2  | PRO | 246 | 48.687 | 20.769 | 55.249 | 1.00 | 0.00 | H |
| ATOM | 3805 | HG3  | PRO | 246 | 47.078 | 19.990 | 55.305 | 1.00 | 0.00 | H |
| ATOM | 3806 | CB   | PRO | 246 | 47.222 | 21.883 | 56.308 | 1.00 | 0.00 | C |
| ATOM | 3807 | HB2  | PRO | 246 | 47.748 | 21.664 | 57.238 | 1.00 | 0.00 | H |
| ATOM | 3808 | HB3  | PRO | 246 | 46.144 | 21.831 | 56.467 | 1.00 | 0.00 | H |

|      |      |      |     |     |        |        |        |      |      |   |
|------|------|------|-----|-----|--------|--------|--------|------|------|---|
| ATOM | 3809 | CA   | PRO | 246 | 47.586 | 23.264 | 55.755 | 1.00 | 0.00 | C |
| ATOM | 3810 | HA   | PRO | 246 | 46.886 | 24.018 | 56.120 | 1.00 | 0.00 | H |
| ATOM | 3811 | C    | PRO | 246 | 49.073 | 23.675 | 56.088 | 1.00 | 0.00 | C |
| ATOM | 3812 | O    | PRO | 246 | 50.028 | 23.361 | 55.400 | 1.00 | 0.00 | O |
| ATOM | 3813 | N    | THR | 247 | 49.125 | 24.324 | 57.270 | 1.00 | 0.00 | N |
| ATOM | 3814 | H    | THR | 247 | 48.273 | 24.527 | 57.772 | 1.00 | 0.00 | H |
| ATOM | 3815 | CA   | THR | 247 | 50.392 | 24.721 | 57.880 | 1.00 | 0.00 | C |
| ATOM | 3816 | HA   | THR | 247 | 50.957 | 25.260 | 57.127 | 1.00 | 0.00 | H |
| ATOM | 3817 | CB   | THR | 247 | 50.111 | 25.684 | 59.049 | 1.00 | 0.00 | C |
| ATOM | 3818 | HB   | THR | 247 | 51.047 | 25.911 | 59.560 | 1.00 | 0.00 | H |
| ATOM | 3819 | CG2  | THR | 247 | 49.507 | 26.983 | 58.537 | 1.00 | 0.00 | C |
| ATOM | 3820 | HG21 | THR | 247 | 50.159 | 27.424 | 57.786 | 1.00 | 0.00 | H |
| ATOM | 3821 | HG22 | THR | 247 | 48.519 | 26.805 | 58.114 | 1.00 | 0.00 | H |
| ATOM | 3822 | HG23 | THR | 247 | 49.416 | 27.686 | 59.365 | 1.00 | 0.00 | H |
| ATOM | 3823 | OG1  | THR | 247 | 49.201 | 25.068 | 59.970 | 1.00 | 0.00 | O |
| ATOM | 3824 | HG1  | THR | 247 | 49.586 | 24.244 | 60.278 | 1.00 | 0.00 | H |
| ATOM | 3825 | C    | THR | 247 | 51.295 | 23.545 | 58.386 | 1.00 | 0.00 | C |
| ATOM | 3826 | O    | THR | 247 | 50.795 | 22.430 | 58.601 | 1.00 | 0.00 | O |
| ATOM | 3827 | N    | GLN | 248 | 52.624 | 23.713 | 58.237 | 1.00 | 0.00 | N |
| ATOM | 3828 | H    | GLN | 248 | 52.941 | 24.620 | 57.922 | 1.00 | 0.00 | H |
| ATOM | 3829 | CA   | GLN | 248 | 53.718 | 22.703 | 58.534 | 1.00 | 0.00 | C |
| ATOM | 3830 | HA   | GLN | 248 | 53.247 | 21.730 | 58.662 | 1.00 | 0.00 | H |
| ATOM | 3831 | CB   | GLN | 248 | 54.717 | 22.614 | 57.377 | 1.00 | 0.00 | C |
| ATOM | 3832 | HB2  | GLN | 248 | 55.246 | 23.565 | 57.300 | 1.00 | 0.00 | H |
| ATOM | 3833 | HB3  | GLN | 248 | 55.444 | 21.841 | 57.607 | 1.00 | 0.00 | H |
| ATOM | 3834 | CG   | GLN | 248 | 54.084 | 22.309 | 56.030 | 1.00 | 0.00 | C |
| ATOM | 3835 | HG2  | GLN | 248 | 53.399 | 23.110 | 55.748 | 1.00 | 0.00 | H |
| ATOM | 3836 | HG3  | GLN | 248 | 54.865 | 22.260 | 55.274 | 1.00 | 0.00 | H |
| ATOM | 3837 | CD   | GLN | 248 | 53.355 | 20.979 | 56.021 | 1.00 | 0.00 | C |
| ATOM | 3838 | OE1  | GLN | 248 | 52.061 | 21.016 | 55.726 | 1.00 | 0.00 | O |

|      |      |      |     |     |        |        |        |      |      |   |
|------|------|------|-----|-----|--------|--------|--------|------|------|---|
| ATOM | 3839 | NE2  | GLN | 248 | 53.949 | 19.928 | 56.277 | 1.00 | 0.00 | N |
| ATOM | 3840 | HE21 | GLN | 248 | 54.937 | 19.939 | 56.476 | 1.00 | 0.00 | H |
| ATOM | 3841 | HE22 | GLN | 248 | 53.438 | 19.058 | 56.246 | 1.00 | 0.00 | H |
| ATOM | 3842 | C    | GLN | 248 | 54.459 | 23.106 | 59.857 | 1.00 | 0.00 | C |
| ATOM | 3843 | O    | GLN | 248 | 54.541 | 24.322 | 60.160 | 1.00 | 0.00 | O |
| ATOM | 3844 | N    | PRO | 249 | 55.207 | 22.224 | 60.554 | 1.00 | 0.00 | N |
| ATOM | 3845 | CD   | PRO | 249 | 55.088 | 20.801 | 60.291 | 1.00 | 0.00 | C |
| ATOM | 3846 | HD2  | PRO | 249 | 55.732 | 20.516 | 59.459 | 1.00 | 0.00 | H |
| ATOM | 3847 | HD3  | PRO | 249 | 54.058 | 20.486 | 60.128 | 1.00 | 0.00 | H |
| ATOM | 3848 | CG   | PRO | 249 | 55.604 | 20.209 | 61.576 | 1.00 | 0.00 | C |
| ATOM | 3849 | HG2  | PRO | 249 | 56.060 | 19.232 | 61.411 | 1.00 | 0.00 | H |
| ATOM | 3850 | HG3  | PRO | 249 | 54.785 | 20.126 | 62.293 | 1.00 | 0.00 | H |
| ATOM | 3851 | CB   | PRO | 249 | 56.599 | 21.204 | 62.069 | 1.00 | 0.00 | C |
| ATOM | 3852 | HB2  | PRO | 249 | 57.539 | 21.066 | 61.532 | 1.00 | 0.00 | H |
| ATOM | 3853 | HB3  | PRO | 249 | 56.762 | 21.111 | 63.143 | 1.00 | 0.00 | H |
| ATOM | 3854 | CA   | PRO | 249 | 55.983 | 22.560 | 61.710 | 1.00 | 0.00 | C |
| ATOM | 3855 | HA   | PRO | 249 | 55.309 | 22.878 | 62.507 | 1.00 | 0.00 | H |
| ATOM | 3856 | C    | PRO | 249 | 57.063 | 23.614 | 61.485 | 1.00 | 0.00 | C |
| ATOM | 3857 | O    | PRO | 249 | 57.586 | 23.766 | 60.403 | 1.00 | 0.00 | O |
| ATOM | 3858 | N    | LEU | 250 | 57.467 | 24.284 | 62.544 | 1.00 | 0.00 | N |
| ATOM | 3859 | H    | LEU | 250 | 57.003 | 24.126 | 63.427 | 1.00 | 0.00 | H |
| ATOM | 3860 | CA   | LEU | 250 | 58.546 | 25.272 | 62.521 | 1.00 | 0.00 | C |
| ATOM | 3861 | HA   | LEU | 250 | 58.283 | 26.072 | 61.844 | 1.00 | 0.00 | H |
| ATOM | 3862 | CB   | LEU | 250 | 58.719 | 25.872 | 63.922 | 1.00 | 0.00 | C |
| ATOM | 3863 | HB2  | LEU | 250 | 58.828 | 25.053 | 64.635 | 1.00 | 0.00 | H |
| ATOM | 3864 | HB3  | LEU | 250 | 59.651 | 26.439 | 63.942 | 1.00 | 0.00 | H |
| ATOM | 3865 | CG   | LEU | 250 | 57.589 | 26.795 | 64.395 | 1.00 | 0.00 | C |
| ATOM | 3866 | HG   | LEU | 250 | 56.640 | 26.258 | 64.359 | 1.00 | 0.00 | H |
| ATOM | 3867 | CD1  | LEU | 250 | 57.845 | 27.215 | 65.836 | 1.00 | 0.00 | C |
| ATOM | 3868 | HD11 | LEU | 250 | 57.035 | 27.859 | 66.181 | 1.00 | 0.00 | H |

|      |      |      |     |     |        |        |        |      |      |   |
|------|------|------|-----|-----|--------|--------|--------|------|------|---|
| ATOM | 3869 | HD12 | LEU | 250 | 57.880 | 26.335 | 66.479 | 1.00 | 0.00 | H |
| ATOM | 3870 | HD13 | LEU | 250 | 58.789 | 27.755 | 65.914 | 1.00 | 0.00 | H |
| ATOM | 3871 | CD2  | LEU | 250 | 57.505 | 28.007 | 63.479 | 1.00 | 0.00 | C |
| ATOM | 3872 | HD21 | LEU | 250 | 56.816 | 28.737 | 63.905 | 1.00 | 0.00 | H |
| ATOM | 3873 | HD22 | LEU | 250 | 58.476 | 28.476 | 63.354 | 1.00 | 0.00 | H |
| ATOM | 3874 | HD23 | LEU | 250 | 57.112 | 27.720 | 62.505 | 1.00 | 0.00 | H |
| ATOM | 3875 | C    | LEU | 250 | 59.890 | 24.690 | 62.043 | 1.00 | 0.00 | C |
| ATOM | 3876 | O    | LEU | 250 | 60.684 | 25.404 | 61.449 | 1.00 | 0.00 | O |
| ATOM | 3877 | N    | ASN | 251 | 60.291 | 23.411 | 62.447 | 1.00 | 0.00 | N |
| ATOM | 3878 | H    | ASN | 251 | 59.657 | 22.846 | 62.993 | 1.00 | 0.00 | H |
| ATOM | 3879 | CA   | ASN | 251 | 61.567 | 22.819 | 62.062 | 1.00 | 0.00 | C |
| ATOM | 3880 | HA   | ASN | 251 | 61.675 | 21.889 | 62.620 | 1.00 | 0.00 | H |
| ATOM | 3881 | CB   | ASN | 251 | 61.557 | 22.503 | 60.578 | 1.00 | 0.00 | C |
| ATOM | 3882 | HB2  | ASN | 251 | 61.453 | 23.417 | 59.993 | 1.00 | 0.00 | H |
| ATOM | 3883 | HB3  | ASN | 251 | 62.490 | 22.017 | 60.290 | 1.00 | 0.00 | H |
| ATOM | 3884 | CG   | ASN | 251 | 60.472 | 21.533 | 60.200 | 1.00 | 0.00 | C |
| ATOM | 3885 | OD1  | ASN | 251 | 59.737 | 21.853 | 59.166 | 1.00 | 0.00 | O |
| ATOM | 3886 | ND2  | ASN | 251 | 60.301 | 20.492 | 60.846 | 1.00 | 0.00 | N |
| ATOM | 3887 | HD21 | ASN | 251 | 60.913 | 20.267 | 61.614 | 1.00 | 0.00 | H |
| ATOM | 3888 | HD22 | ASN | 251 | 59.557 | 19.864 | 60.583 | 1.00 | 0.00 | H |
| ATOM | 3889 | C    | ASN | 251 | 62.781 | 23.662 | 62.394 | 1.00 | 0.00 | C |
| ATOM | 3890 | O    | ASN | 251 | 63.734 | 23.528 | 61.642 | 1.00 | 0.00 | O |
| ATOM | 3891 | N    | GLY | 252 | 62.794 | 24.344 | 63.542 | 1.00 | 0.00 | N |
| ATOM | 3892 | H    | GLY | 252 | 61.977 | 24.326 | 64.134 | 1.00 | 0.00 | H |
| ATOM | 3893 | CA   | GLY | 252 | 63.901 | 25.236 | 63.932 | 1.00 | 0.00 | C |
| ATOM | 3894 | HA2  | GLY | 252 | 64.003 | 25.197 | 65.017 | 1.00 | 0.00 | H |
| ATOM | 3895 | HA3  | GLY | 252 | 64.832 | 24.881 | 63.489 | 1.00 | 0.00 | H |
| ATOM | 3896 | C    | GLY | 252 | 63.685 | 26.720 | 63.515 | 1.00 | 0.00 | C |
| ATOM | 3897 | O    | GLY | 252 | 64.500 | 27.484 | 63.902 | 1.00 | 0.00 | O |
| ATOM | 3898 | N    | ARG | 253 | 62.527 | 27.013 | 62.815 | 1.00 | 0.00 | N |

|      |      |      |     |     |        |        |        |      |      |   |
|------|------|------|-----|-----|--------|--------|--------|------|------|---|
| ATOM | 3899 | H    | ARG | 253 | 61.906 | 26.251 | 62.586 | 1.00 | 0.00 | H |
| ATOM | 3900 | CA   | ARG | 253 | 62.133 | 28.354 | 62.355 | 1.00 | 0.00 | C |
| ATOM | 3901 | HA   | ARG | 253 | 63.017 | 28.823 | 61.921 | 1.00 | 0.00 | H |
| ATOM | 3902 | CB   | ARG | 253 | 61.088 | 28.221 | 61.257 | 1.00 | 0.00 | C |
| ATOM | 3903 | HB2  | ARG | 253 | 61.511 | 27.603 | 60.464 | 1.00 | 0.00 | H |
| ATOM | 3904 | HB3  | ARG | 253 | 60.212 | 27.741 | 61.689 | 1.00 | 0.00 | H |
| ATOM | 3905 | CG   | ARG | 253 | 60.629 | 29.537 | 60.649 | 1.00 | 0.00 | C |
| ATOM | 3906 | HG2  | ARG | 253 | 60.030 | 30.090 | 61.374 | 1.00 | 0.00 | H |
| ATOM | 3907 | HG3  | ARG | 253 | 61.497 | 30.139 | 60.378 | 1.00 | 0.00 | H |
| ATOM | 3908 | CD   | ARG | 253 | 59.805 | 29.322 | 59.432 | 1.00 | 0.00 | C |
| ATOM | 3909 | HD2  | ARG | 253 | 59.381 | 30.282 | 59.133 | 1.00 | 0.00 | H |
| ATOM | 3910 | HD3  | ARG | 253 | 60.440 | 28.990 | 58.614 | 1.00 | 0.00 | H |
| ATOM | 3911 | NE   | ARG | 253 | 58.711 | 28.396 | 59.674 | 1.00 | 0.00 | N |
| ATOM | 3912 | HE   | ARG | 253 | 57.923 | 28.743 | 60.198 | 1.00 | 0.00 | H |
| ATOM | 3913 | CZ   | ARG | 253 | 58.687 | 27.114 | 59.260 | 1.00 | 0.00 | C |
| ATOM | 3914 | NH1  | ARG | 253 | 59.704 | 26.622 | 58.587 | 1.00 | 0.00 | N |
| ATOM | 3915 | HH11 | ARG | 253 | 60.508 | 27.204 | 58.410 | 1.00 | 0.00 | H |
| ATOM | 3916 | HH12 | ARG | 253 | 59.682 | 25.670 | 58.255 | 1.00 | 0.00 | H |
| ATOM | 3917 | NH2  | ARG | 253 | 57.643 | 26.351 | 59.531 | 1.00 | 0.00 | N |
| ATOM | 3918 | HH21 | ARG | 253 | 56.853 | 26.727 | 60.032 | 1.00 | 0.00 | H |
| ATOM | 3919 | HH22 | ARG | 253 | 57.644 | 25.379 | 59.255 | 1.00 | 0.00 | H |
| ATOM | 3920 | C    | ARG | 253 | 61.580 | 29.302 | 63.407 | 1.00 | 0.00 | C |
| ATOM | 3921 | O    | ARG | 253 | 60.724 | 28.972 | 64.220 | 1.00 | 0.00 | O |
| ATOM | 3922 | N    | VAL | 254 | 61.913 | 30.605 | 63.423 | 1.00 | 0.00 | N |
| ATOM | 3923 | H    | VAL | 254 | 62.570 | 30.929 | 62.729 | 1.00 | 0.00 | H |
| ATOM | 3924 | CA   | VAL | 254 | 61.424 | 31.633 | 64.392 | 1.00 | 0.00 | C |
| ATOM | 3925 | HA   | VAL | 254 | 60.784 | 31.170 | 65.143 | 1.00 | 0.00 | H |
| ATOM | 3926 | CB   | VAL | 254 | 62.603 | 32.310 | 65.116 | 1.00 | 0.00 | C |
| ATOM | 3927 | HB   | VAL | 254 | 63.273 | 32.753 | 64.377 | 1.00 | 0.00 | H |
| ATOM | 3928 | CG1  | VAL | 254 | 62.102 | 33.420 | 66.028 | 1.00 | 0.00 | C |

|      |      |      |     |     |        |        |        |      |      |   |
|------|------|------|-----|-----|--------|--------|--------|------|------|---|
| ATOM | 3929 | HG11 | VAL | 254 | 62.903 | 33.751 | 66.686 | 1.00 | 0.00 | H |
| ATOM | 3930 | HG12 | VAL | 254 | 61.780 | 34.277 | 65.439 | 1.00 | 0.00 | H |
| ATOM | 3931 | HG13 | VAL | 254 | 61.274 | 33.053 | 66.628 | 1.00 | 0.00 | H |
| ATOM | 3932 | CG2  | VAL | 254 | 63.389 | 31.275 | 65.906 | 1.00 | 0.00 | C |
| ATOM | 3933 | HG21 | VAL | 254 | 64.200 | 31.764 | 66.446 | 1.00 | 0.00 | H |
| ATOM | 3934 | HG22 | VAL | 254 | 62.737 | 30.775 | 66.624 | 1.00 | 0.00 | H |
| ATOM | 3935 | HG23 | VAL | 254 | 63.827 | 30.532 | 65.240 | 1.00 | 0.00 | H |
| ATOM | 3936 | C    | VAL | 254 | 60.586 | 32.705 | 63.618 | 1.00 | 0.00 | C |
| ATOM | 3937 | O    | VAL | 254 | 60.997 | 33.164 | 62.543 | 1.00 | 0.00 | O |
| ATOM | 3938 | N    | VAL | 255 | 59.463 | 33.069 | 64.163 | 1.00 | 0.00 | N |
| ATOM | 3939 | H    | VAL | 255 | 59.178 | 32.663 | 65.042 | 1.00 | 0.00 | H |
| ATOM | 3940 | CA   | VAL | 255 | 58.662 | 34.139 | 63.608 | 1.00 | 0.00 | C |
| ATOM | 3941 | HA   | VAL | 255 | 58.907 | 34.294 | 62.557 | 1.00 | 0.00 | H |
| ATOM | 3942 | CB   | VAL | 255 | 57.180 | 33.723 | 63.662 | 1.00 | 0.00 | C |
| ATOM | 3943 | HB   | VAL | 255 | 56.585 | 34.515 | 63.217 | 1.00 | 0.00 | H |
| ATOM | 3944 | CG1  | VAL | 255 | 56.956 | 32.447 | 62.865 | 1.00 | 0.00 | C |
| ATOM | 3945 | HG11 | VAL | 255 | 55.885 | 32.275 | 62.748 | 1.00 | 0.00 | H |
| ATOM | 3946 | HG12 | VAL | 255 | 57.411 | 32.534 | 61.881 | 1.00 | 0.00 | H |
| ATOM | 3947 | HG13 | VAL | 255 | 57.391 | 31.587 | 63.377 | 1.00 | 0.00 | H |
| ATOM | 3948 | CG2  | VAL | 255 | 56.746 | 33.540 | 65.108 | 1.00 | 0.00 | C |
| ATOM | 3949 | HG21 | VAL | 255 | 55.714 | 33.189 | 65.122 | 1.00 | 0.00 | H |
| ATOM | 3950 | HG22 | VAL | 255 | 57.351 | 32.797 | 65.621 | 1.00 | 0.00 | H |
| ATOM | 3951 | HG23 | VAL | 255 | 56.784 | 34.482 | 65.642 | 1.00 | 0.00 | H |
| ATOM | 3952 | C    | VAL | 255 | 58.844 | 35.519 | 64.331 | 1.00 | 0.00 | C |
| ATOM | 3953 | O    | VAL | 255 | 59.499 | 35.487 | 65.352 | 1.00 | 0.00 | O |
| ATOM | 3954 | N    | TYR | 256 | 58.285 | 36.635 | 63.871 | 1.00 | 0.00 | N |
| ATOM | 3955 | H    | TYR | 256 | 57.749 | 36.639 | 63.014 | 1.00 | 0.00 | H |
| ATOM | 3956 | CA   | TYR | 256 | 58.536 | 37.913 | 64.563 | 1.00 | 0.00 | C |
| ATOM | 3957 | HA   | TYR | 256 | 58.670 | 37.706 | 65.621 | 1.00 | 0.00 | H |
| ATOM | 3958 | CB   | TYR | 256 | 59.839 | 38.521 | 64.040 | 1.00 | 0.00 | C |

|      |      |     |     |     |        |        |        |      |      |   |
|------|------|-----|-----|-----|--------|--------|--------|------|------|---|
| ATOM | 3959 | HB2 | TYR | 256 | 60.063 | 39.425 | 64.603 | 1.00 | 0.00 | H |
| ATOM | 3960 | HB3 | TYR | 256 | 60.659 | 37.824 | 64.217 | 1.00 | 0.00 | H |
| ATOM | 3961 | CG  | TYR | 256 | 59.798 | 38.883 | 62.572 | 1.00 | 0.00 | C |
| ATOM | 3962 | CD1 | TYR | 256 | 59.346 | 40.135 | 62.179 | 1.00 | 0.00 | C |
| ATOM | 3963 | HD1 | TYR | 256 | 58.993 | 40.842 | 62.908 | 1.00 | 0.00 | H |
| ATOM | 3964 | CE1 | TYR | 256 | 59.308 | 40.466 | 60.838 | 1.00 | 0.00 | C |
| ATOM | 3965 | HE1 | TYR | 256 | 58.969 | 41.445 | 60.532 | 1.00 | 0.00 | H |
| ATOM | 3966 | CZ  | TYR | 256 | 59.724 | 39.541 | 59.888 | 1.00 | 0.00 | C |
| ATOM | 3967 | OH  | TYR | 256 | 59.686 | 39.871 | 58.552 | 1.00 | 0.00 | O |
| ATOM | 3968 | HH  | TYR | 256 | 59.979 | 39.149 | 57.994 | 1.00 | 0.00 | H |
| ATOM | 3969 | CE2 | TYR | 256 | 60.173 | 38.296 | 60.278 | 1.00 | 0.00 | C |
| ATOM | 3970 | HE2 | TYR | 256 | 60.518 | 37.588 | 59.540 | 1.00 | 0.00 | H |
| ATOM | 3971 | CD2 | TYR | 256 | 60.211 | 37.965 | 61.619 | 1.00 | 0.00 | C |
| ATOM | 3972 | HD2 | TYR | 256 | 60.538 | 36.979 | 61.919 | 1.00 | 0.00 | H |
| ATOM | 3973 | C   | TYR | 256 | 57.416 | 38.962 | 64.460 | 1.00 | 0.00 | C |
| ATOM | 3974 | O   | TYR | 256 | 56.768 | 39.042 | 63.436 | 1.00 | 0.00 | O |
| ATOM | 3975 | N   | HIE | 257 | 57.356 | 39.913 | 65.479 | 1.00 | 0.00 | N |
| ATOM | 3976 | H   | HIE | 257 | 57.961 | 39.827 | 66.282 | 1.00 | 0.00 | H |
| ATOM | 3977 | CA  | HIE | 257 | 56.518 | 41.167 | 65.343 | 1.00 | 0.00 | C |
| ATOM | 3978 | HA  | HIE | 257 | 55.646 | 40.935 | 64.730 | 1.00 | 0.00 | H |
| ATOM | 3979 | CB  | HIE | 257 | 56.006 | 41.624 | 66.712 | 1.00 | 0.00 | C |
| ATOM | 3980 | HB2 | HIE | 257 | 56.847 | 41.708 | 67.402 | 1.00 | 0.00 | H |
| ATOM | 3981 | HB3 | HIE | 257 | 55.553 | 42.612 | 66.617 | 1.00 | 0.00 | H |
| ATOM | 3982 | CG  | HIE | 257 | 54.972 | 40.715 | 67.302 | 1.00 | 0.00 | C |
| ATOM | 3983 | ND1 | HIE | 257 | 53.676 | 40.661 | 66.835 | 1.00 | 0.00 | N |
| ATOM | 3984 | CE1 | HIE | 257 | 52.994 | 39.776 | 67.541 | 1.00 | 0.00 | C |
| ATOM | 3985 | HE1 | HIE | 257 | 51.951 | 39.531 | 67.404 | 1.00 | 0.00 | H |
| ATOM | 3986 | NE2 | HIE | 257 | 53.800 | 39.256 | 68.448 | 1.00 | 0.00 | N |
| ATOM | 3987 | HE2 | HIE | 257 | 53.540 | 38.555 | 69.127 | 1.00 | 0.00 | H |
| ATOM | 3988 | CD2 | HIE | 257 | 55.043 | 39.826 | 68.320 | 1.00 | 0.00 | C |



|      |      |     |     |     |        |        |        |      |      |   |
|------|------|-----|-----|-----|--------|--------|--------|------|------|---|
| ATOM | 3989 | HD2 | HIE | 257 | 55.914 | 39.610 | 68.920 | 1.00 | 0.00 | H |
| ATOM | 3990 | C   | HIE | 257 | 57.231 | 42.345 | 64.696 | 1.00 | 0.00 | C |
| ATOM | 3991 | O   | HIE | 257 | 58.454 | 42.412 | 64.684 | 1.00 | 0.00 | O |
| ATOM | 3992 | N   | PHE | 258 | 56.485 | 43.257 | 64.082 | 1.00 | 0.00 | N |
| ATOM | 3993 | H   | PHE | 258 | 55.484 | 43.123 | 64.090 | 1.00 | 0.00 | H |
| ATOM | 3994 | CA  | PHE | 258 | 56.964 | 44.530 | 63.511 | 1.00 | 0.00 | C |
| ATOM | 3995 | HA  | PHE | 258 | 57.994 | 44.410 | 63.172 | 1.00 | 0.00 | H |
| ATOM | 3996 | CB  | PHE | 258 | 56.115 | 44.916 | 62.298 | 1.00 | 0.00 | C |
| ATOM | 3997 | HB2 | PHE | 258 | 55.066 | 44.903 | 62.586 | 1.00 | 0.00 | H |
| ATOM | 3998 | HB3 | PHE | 258 | 56.356 | 45.940 | 62.008 | 1.00 | 0.00 | H |
| ATOM | 3999 | CG  | PHE | 258 | 56.328 | 44.031 | 61.102 | 1.00 | 0.00 | C |
| ATOM | 4000 | CD1 | PHE | 258 | 55.618 | 42.849 | 60.961 | 1.00 | 0.00 | C |
| ATOM | 4001 | HD1 | PHE | 258 | 54.925 | 42.553 | 61.725 | 1.00 | 0.00 | H |
| ATOM | 4002 | CE1 | PHE | 258 | 55.814 | 42.034 | 59.862 | 1.00 | 0.00 | C |
| ATOM | 4003 | HE1 | PHE | 258 | 55.224 | 41.142 | 59.779 | 1.00 | 0.00 | H |
| ATOM | 4004 | CZ  | PHE | 258 | 56.722 | 42.394 | 58.890 | 1.00 | 0.00 | C |
| ATOM | 4005 | HZ  | PHE | 258 | 56.886 | 41.758 | 58.034 | 1.00 | 0.00 | H |
| ATOM | 4006 | CE2 | PHE | 258 | 57.437 | 43.569 | 59.017 | 1.00 | 0.00 | C |
| ATOM | 4007 | HE2 | PHE | 258 | 58.146 | 43.855 | 58.257 | 1.00 | 0.00 | H |
| ATOM | 4008 | CD2 | PHE | 258 | 57.240 | 44.380 | 60.117 | 1.00 | 0.00 | C |
| ATOM | 4009 | HD2 | PHE | 258 | 57.801 | 45.291 | 60.212 | 1.00 | 0.00 | H |
| ATOM | 4010 | C   | PHE | 258 | 56.941 | 45.676 | 64.527 | 1.00 | 0.00 | C |
| ATOM | 4011 | O   | PHE | 258 | 56.358 | 45.537 | 65.591 | 1.00 | 0.00 | O |
| ATOM | 4012 | N   | VAL | 259 | 57.656 | 46.800 | 64.382 | 1.00 | 0.00 | N |
| ATOM | 4013 | H   | VAL | 259 | 58.165 | 46.906 | 63.514 | 1.00 | 0.00 | H |
| ATOM | 4014 | CA  | VAL | 259 | 57.780 | 47.929 | 65.287 | 1.00 | 0.00 | C |
| ATOM | 4015 | HA  | VAL | 259 | 57.092 | 47.807 | 66.123 | 1.00 | 0.00 | H |
| ATOM | 4016 | CB  | VAL | 259 | 59.213 | 48.003 | 65.847 | 1.00 | 0.00 | C |
| ATOM | 4017 | HB  | VAL | 259 | 59.281 | 48.832 | 66.553 | 1.00 | 0.00 | H |
| ATOM | 4018 | CG1 | VAL | 259 | 59.557 | 46.725 | 66.599 | 1.00 | 0.00 | C |

|      |      |      |     |     |        |        |        |      |      |   |
|------|------|------|-----|-----|--------|--------|--------|------|------|---|
| ATOM | 4019 | HG11 | VAL | 259 | 60.549 | 46.821 | 67.039 | 1.00 | 0.00 | H |
| ATOM | 4020 | HG12 | VAL | 259 | 58.822 | 46.561 | 67.386 | 1.00 | 0.00 | H |
| ATOM | 4021 | HG13 | VAL | 259 | 59.556 | 45.863 | 65.934 | 1.00 | 0.00 | H |
| ATOM | 4022 | CG2  | VAL | 259 | 60.199 | 48.245 | 64.715 | 1.00 | 0.00 | C |
| ATOM | 4023 | HG21 | VAL | 259 | 61.194 | 48.371 | 65.140 | 1.00 | 0.00 | H |
| ATOM | 4024 | HG22 | VAL | 259 | 60.221 | 47.400 | 64.029 | 1.00 | 0.00 | H |
| ATOM | 4025 | HG23 | VAL | 259 | 59.962 | 49.151 | 64.163 | 1.00 | 0.00 | H |
| ATOM | 4026 | C    | VAL | 259 | 57.447 | 49.240 | 64.620 | 1.00 | 0.00 | C |
| ATOM | 4027 | O    | VAL | 259 | 57.387 | 49.302 | 63.401 | 1.00 | 0.00 | O |
| ATOM | 4028 | N    | ASP | 260 | 57.433 | 50.347 | 65.294 | 1.00 | 0.00 | N |
| ATOM | 4029 | H    | ASP | 260 | 57.566 | 50.315 | 66.293 | 1.00 | 0.00 | H |
| ATOM | 4030 | CA   | ASP | 260 | 57.027 | 51.674 | 64.704 | 1.00 | 0.00 | C |
| ATOM | 4031 | HA   | ASP | 260 | 56.154 | 51.525 | 64.068 | 1.00 | 0.00 | H |
| ATOM | 4032 | CB   | ASP | 260 | 56.656 | 52.664 | 65.811 | 1.00 | 0.00 | C |
| ATOM | 4033 | HB2  | ASP | 260 | 57.485 | 52.753 | 66.516 | 1.00 | 0.00 | H |
| ATOM | 4034 | HB3  | ASP | 260 | 56.461 | 53.645 | 65.373 | 1.00 | 0.00 | H |
| ATOM | 4035 | CG   | ASP | 260 | 55.393 | 52.266 | 66.563 | 1.00 | 0.00 | C |
| ATOM | 4036 | OD1  | ASP | 260 | 54.465 | 51.819 | 65.931 | 1.00 | 0.00 | O |
| ATOM | 4037 | OD2  | ASP | 260 | 55.368 | 52.413 | 67.761 | 1.00 | 0.00 | O |
| ATOM | 4038 | C    | ASP | 260 | 58.157 | 52.286 | 63.822 | 1.00 | 0.00 | C |
| ATOM | 4039 | O    | ASP | 260 | 58.660 | 53.339 | 64.257 | 1.00 | 0.00 | O |
| ATOM | 4040 | N    | MET | 261 | 58.476 | 51.676 | 62.706 | 1.00 | 0.00 | N |
| ATOM | 4041 | H    | MET | 261 | 57.987 | 50.839 | 62.421 | 1.00 | 0.00 | H |
| ATOM | 4042 | CA   | MET | 261 | 59.498 | 52.211 | 61.839 | 1.00 | 0.00 | C |
| ATOM | 4043 | HA   | MET | 261 | 59.895 | 53.142 | 62.243 | 1.00 | 0.00 | H |
| ATOM | 4044 | CB   | MET | 261 | 60.657 | 51.219 | 61.760 | 1.00 | 0.00 | C |
| ATOM | 4045 | HB2  | MET | 261 | 60.258 | 50.214 | 61.606 | 1.00 | 0.00 | H |
| ATOM | 4046 | HB3  | MET | 261 | 61.261 | 51.475 | 60.889 | 1.00 | 0.00 | H |
| ATOM | 4047 | CG   | MET | 261 | 61.571 | 51.220 | 62.977 | 1.00 | 0.00 | C |
| ATOM | 4048 | HG2  | MET | 261 | 62.121 | 52.161 | 63.006 | 1.00 | 0.00 | H |

ATOM 4049 HG3 MET 261 60.967 51.151 63.881 1.00 0.00 H  
ATOM 4050 SD MET 261 62.743 49.849 62.968 1.00 0.00 S  
ATOM 4051 CE MET 261 63.596 50.144 61.422 1.00 0.00 C  
ATOM 4052 HE1 MET 261 64.454 49.475 61.350 1.00 0.00 H  
ATOM 4053 HE2 MET 261 62.924 49.945 60.588 1.00 0.00 H  
ATOM 4054 HE3 MET 261 63.938 51.178 61.383 1.00 0.00 H  
ATOM 4055 C MET 261 58.997 52.549 60.434 1.00 0.00 C  
ATOM 4056 O MET 261 58.064 51.805 59.974 1.00 0.00 O  
ATOM 4057 OXT MET 261 59.583 53.439 59.788 1.00 0.00 O  
TER 4057 MET 261  
HETATM 4058 ZN ZN A 262 47.057 32.618 47.950 1.00 0.00 ZN  
END
